# Supplementary material
Source: publisher figshare collection journal article supplement (https://acs.figshare.com/ndownloader/files/27341520)
Supplement: Supplementary file 1 [file 27341520]

## Sheet: 1st iTRAQ results
Supplementary Table 2(a). The list of identified proteins of 1st iTRAQ experiment.
Accession	Protein	MW [kDa]	pI	Scores	#Peptides	SC [%]	RMS90 [ppm]	Median(CKD/N)	#(CKD/N)	CV [%](CKD/N)	Median(UC/N)	#(UC/N)	CV [%](UC/N)	Median(UC/CKD)	#(UC/CKD)	CV [%](UC/CKD)
1433B_HUMAN	14-3-3 protein beta/alpha	28.1	4.6	780.3	15	48.0	12.37	0.831169	84	43.96	1.21774	85	54.62	1.35795	84	74.75
1433E_HUMAN	14-3-3 protein epsilon	29.2	4.5	677.3	13	41.6	12.37	0.857143	60	44.2	1.41129	64	44.74	1.51136	61	58.73
1433F_HUMAN	14-3-3 protein eta	28.2	4.6	350.8	8	21.1	11.94	0.87013	46	45.28	1.34677	47	54.38	1.43182	46	80.27
1433G_HUMAN	14-3-3 protein gamma	28.3	4.7	512.6	10	25.9	11.57	0.805195	58	44.09	1.16935	58	57.76	1.31818	58	74.76
1433S_HUMAN	14-3-3 protein sigma	27.8	4.5	398.8	8	22.6	11.61	0.753247	51	57.54	1.15323	52	70.15	1.40909	52	75.53
1433T_HUMAN	14-3-3 protein theta	27.7	4.5	413	10	25.7	12.90	0.818182	53	42.73	1.20968	56	59.01	1.30682	55	79.21
1433Z_HUMAN	14-3-3 protein zeta/delta	27.7	4.6	863.4	16	55.5	12.07	0.831169	83	51.83	1.25806	86	66.74	1.33523	88	62.26
1B57_HUMAN	HLA class I histocompatibility antigen, B-57 alpha chain	40.2	5.9	150	3	9.9	318.91	1.33766	9	24.35	1.45161	9	8.46	0.988636	9	29.59
1C05_HUMAN	HLA class I histocompatibility antigen, Cw-5 alpha chain	40.9	7.8	76.6	2	5.5	10.45	0.922078	4	16.38	0.854839	4	133.96	0.857955	4	105.8
2AAA_HUMAN	Serine/threonine-protein phosphatase 2A 65 kDa regulatory subunit A alpha isoform	65.3	4.9	142.9	2	5.4	16.84	0.662338	10	69.3	0.91129	10	54.06	1.25568	10	56.46
4F2_HUMAN	4F2 cell-surface antigen heavy chain	68.0	4.7	421	10	19.2	9.54	0.584416	30	60.23	0.596774	29	49.88	0.977273	30	52.05
6PGD_HUMAN	6-phosphogluconate dehydrogenase, decarboxylating	53.1	7.0	437.2	9	19.9	12.51	0.948052	26	31.31	1.33065	26	67.54	1.27841	26	69.21
6PGL_HUMAN	6-phosphogluconolactonase	27.5	5.7	720.8	12	58.5	7.81	0.675325	58	55.55	1.07258	59	24.78	1.48295	59	51.81
8ODP_HUMAN	7,8-dihydro-8-oxoguanine triphosphatase	22.5	5.0	321.2	5	34.5	10.76	0.87013	26	36.18	1.29839	26	26.83	1.375	26	28.79
A16A1_HUMAN	Aldehyde dehydrogenase family 16 member A1	85.1	6.4	60.2	2	3.1	27.20	0.779221	2	28.1	1.16129	2	15.96	1.35227	2	11.75
A1AG1_HUMAN	Alpha-1-acid glycoprotein 1	23.5	4.8	1004.3	18	53.2	12.15	1.75325	115	55.63	1.47581	120	95.77	0.767045	116	59.53
A1AG2_HUMAN	Alpha-1-acid glycoprotein 2	23.6	4.9	620.7	14	46.3	10.19	1.8961	45	145.26	1.20161	45	103.18	0.613636	44	83.39
A1AT_HUMAN	Alpha-1-antitrypsin	46.7	5.3	6178.9	112	74.9	18.44	2.84416	2570	45.08	1.41935	2578	69.29	0.488636	2668	48.32
A1ATR_HUMAN	Putative alpha-1-antitrypsin-related protein	47.9	8.6	195.5	4	3.3	14.05	2.63636	28	48.82	1.6371	27	50.85	0.602273	28	19.84
A1BG_HUMAN	Alpha-1B-glycoprotein	54.2	5.5	1784.1	29	47.7	17.10	2.61039	522	70.4	1.25	514	60.89	0.426136	629	33.5
A2AP_HUMAN	Alpha-2-antiplasmin	54.5	5.9	527.1	7	22.6	11.29	1.66234	31	30.53	1.22581	31	47.05	0.704545	32	41.55
A2GL_HUMAN	Leucine-rich alpha-2-glycoprotein	38.2	6.5	1528.5	28	66.3	12.75	1.5974	211	42.47	2.08871	218	59.21	1.22727	263	40.42
A2MG_HUMAN	Alpha-2-macroglobulin	163.2	6.0	6373.9	113	58.5	12.92	4.16883	787	93.21	3.65323	793	108.79	0.857955	913	34.79
A2ML1_HUMAN	Alpha-2-macroglobulin-like protein 1	161.0	5.4	687.7	12	11.4	14.49	0.584416	40	216.59	0.395161	40	130.96	0.625	40	50.89
A4_HUMAN	Amyloid beta A4 protein	86.9	4.6	148.5	3	4.0	12.12	0.662338	8	114.43	0.774194	8	58.15	1.0625	8	42.19
AACS_HUMAN	Acetoacetyl-CoA synthetase	75.1	5.8	33.2	1	1.6	31.43	0.142857	3	21.08	0.629032	3	1.58	3.96023	3	22.62
AACT_HUMAN	Alpha-1-antichymotrypsin	47.6	5.2	3376.2	58	62.6	14.02	2.22078	501	43.27	1.5	495	57.78	0.630682	528	46.32
AATC_HUMAN	Aspartate aminotransferase, cytoplasmic	46.2	6.6	625.8	12	42.9	11.37	0.701299	31	49.21	0.612903	31	36.78	0.801136	31	29.03
ABCA1_HUMAN	ATP-binding cassette sub-family A member 1	254.1	6.4	30.6	1	0.3	16.07	2.27273	3	1.59	3.16129	3	3.93	1.27273	3	2.36
ABCAD_HUMAN	ATP-binding cassette sub-family A member 13	575.8	6.0	112.2	4	0.7	524.13	2.22078	11	135.83	3.58871	11	132.41	1.76705	10	29.08
ABCC8_HUMAN	ATP-binding cassette sub-family C member 8	176.9	8.9	83.8	3	0.5	412.27	2.44156	5	57.41	3.37903	5	119.4	1.26136	5	42.71
ABCG2_HUMAN	ATP-binding cassette sub-family G member 2	72.3	9.6	68.6	2	2.6	680.32	2.62338	4	28.96	0.919355	4	51.77	0.318182	4	21.04
ABHEB_HUMAN	Alpha/beta hydrolase domain-containing protein 14B	22.3	5.9	382.3	8	33.3	10.06	1.77922	49	88.8	1.35484	49	70.73	0.698864	49	86
ABP1_HUMAN	Amiloride-sensitive amine oxidase [copper-containing]	85.3	6.6	170.4	4	6.7	20.25	0.493506	9	28.24	0.491935	9	41.78	0.903409	9	20.99
ABRAL_HUMAN	Costars family protein ABRACL	9.1	5.8	129	2	16.0	11.57	1.35065	5	61.94	2.44355	5	23.27	1.64773	5	50.03
ACACB_HUMAN	Acetyl-CoA carboxylase 2	276.4	6.0	50.7	2	0.6	61.64	1.75325	2	34.8	1.55645	2	4.73	0.818182	2	29.71
ACBP_HUMAN	Acyl-CoA-binding protein	10.0	6.2	170	4	48.3	103.37	0.597403	17	48.86	0.58871	17	18.33	0.903409	17	51.97
ACE_HUMAN	Angiotensin-converting enzyme	149.6	5.9	595.2	14	13.6	148.35	0.493506	46	82.05	0.669355	48	59.28	1.15909	46	88.79
ACE2_HUMAN	Angiotensin-converting enzyme 2	92.4	5.3	609.4	12	18.4	11.51	0.857143	45	44.39	0.903226	46	39.11	0.9375	46	45.12
ACOC_HUMAN	Cytoplasmic aconitate hydratase	98.3	6.2	137	4	6.0	39.25	0.857143	3	66.39	0.540323	3	31.24	0.585227	3	35.08
ACPH_HUMAN	Acylamino-acid-releasing enzyme	81.2	5.2	298.4	5	8.7	8.88	0.896104	12	25.12	1.03226	12	8.86	1.04545	12	28.88
ACPM_HUMAN	Acyl carrier protein, mitochondrial	17.4	4.6	41	1	3.8	15.28	0.805195	3	8.64	1.44355	3	7.46	1.63636	3	14.52
ACSF4_HUMAN	Acyl-CoA synthetase family member 4	122.5	7.0	34.8	1	0.7	17.82	1.87013	9	19.85	1.87097	9	52.93	0.914773	9	42.79
ACSL1_HUMAN	Long-chain-fatty-acid--CoA ligase 1	77.9	7.0	76.6	2	4.3	8.15	0.597403	3	44.93	0.959677	5	47.14	1.23864	3	11.07
ACSM1_HUMAN	Acyl-coenzyme A synthetase ACSM1, mitochondrial	65.2	9.4	26.4	1	2.4	13.59	2.62338	2	0.35	0.637097	2	4.48	0.221591	2	4.13
ACTB_HUMAN	Actin, cytoplasmic 1	41.7	5.2	2196.6	38	54.1	12.59	0.792208	224	50.69	0.959677	225	38.35	1.07955	219	48.51
ACTC_HUMAN	Actin, alpha cardiac muscle 1	42.0	5.1	1264.1	25	33.4	11.75	0.753247	160	52.97	1.03226	154	38.09	1.19886	153	41.12
ACTN1_HUMAN	Alpha-actinin-1	103.0	5.1	1346.7	26	32.1	13.37	1.24675	93	46.35	1.27419	91	38.48	0.880682	96	40.38
ACTN4_HUMAN	Alpha-actinin-4	104.8	5.2	2463.6	44	56.0	12.60	0.948052	167	50.19	1.1371	161	40.24	1.05682	163	33.73
ACTZ_HUMAN	Alpha-centractin	42.6	6.2	67	1	4.3	246.93	1.01299	4	17.94	0.879032	4	23.33	0.801136	4	30.38
ACY1_HUMAN	Aminoacylase-1	45.9	5.7	423.1	10	35.3	12.34	0.532468	23	73.57	0.612903	27	39.76	1.07955	23	56.07
ADA_HUMAN	Adenosine deaminase	40.7	5.6	57.3	2	4.1	23.02	0.818182	5	23.86	0.879032	5	131.2	0.988636	5	89.76
ADAL_HUMAN	Adenosine deaminase-like protein	40.2	5.9	25.3	1	2.0	1121.89	2.45455	2	2.92	2.94355	2	4.42	1.09659	2	1.49
ADDA_HUMAN	Alpha-adducin	80.9	5.5	61.3	1	2.4	298.54	0.714286	2	21.05	0.58871	2	13.3	0.75	2	7.6
ADDG_HUMAN	Gamma-adducin	79.1	5.9	53.4	2	1.8	335.61	9.09091	3	79.22	4.44355	3	62.44	0.448864	3	12.47
ADEC1_HUMAN	ADAM DEC1	52.7	7.3	33.4	1	1.5	38.50	1	3	13.68	4.45968	3	1.31	4.10227	3	12.59
ADIPO_HUMAN	Adiponectin	26.4	5.4	243.4	4	22.1	19.48	1.77922	14	32.47	1.49194	14	77.15	0.767045	14	72.56
ADT2_HUMAN	ADP/ATP translocase 2	32.8	10.2	72.5	1	4.0	13.71	0.519481	6	21.94	1.06452	6	16.9	1.86364	6	15.03
AFAD_HUMAN	Afadin	206.7	6.0	69.5	2	1.2	871.58	2.81818	3	81.24	2.83065	3	63.29	0.920455	3	180.31
AFAM_HUMAN	Afamin	69.0	5.6	1682.6	32	38.9	13.32	2.84416	177	56.65	1.1371	173	60.84	0.369318	180	31.01
AGA11_HUMAN	Arf-GAP with GTPase, ANK repeat and PH domain-containing protein 11	60.5	8.9	51.2	1	1.1	49.32	0.142857	4	17.76	0.217742	4	10.3	1.45455	4	10.97
AGAL_HUMAN	Alpha-galactosidase A	48.7	5.2	217.6	4	11.0	13.19	0.61039	9	42.68	1.1371	9	14.95	1.69318	9	34.24
AGM1_HUMAN	Phosphoacetylglucosamine mutase	59.8	5.8	58.1	1	1.8	15.25	0.948052	2	13.57	1.65323	2	14.69	1.59659	2	1.11
AGPD1_HUMAN	Hydroxylysine kinase	41.9	6.4	52.8	2	4.0	306.24	0.883117	2	14.94	0.282258	2	32.12	0.295455	2	16.59
AGR2_HUMAN	Anterior gradient protein 2 homolog	20.0	9.5	322.1	6	43.4	10.99	1.46753	49	38.92	2.45161	48	45.83	1.45455	52	50.47
AGRIN_HUMAN	Agrin	217.1	6.0	345.2	7	5.7	10.56	1.06494	13	123.64	1.33065	13	53.74	1.13636	13	91.2
AHNK_HUMAN	Neuroblast differentiation-associated protein AHNAK	628.7	5.7	60.9	2	0.3	887.09	1.7013	3	31.84	1.84677	3	40.39	0.994318	3	8.53
AHSA1_HUMAN	Activator of 90 kDa heat shock protein ATPase homolog 1	38.3	5.3	105.6	3	11.5	552.71	1.64935	3	76.63	1.16129	3	22.57	0.647727	3	58.38
AK1A1_HUMAN	Alcohol dehydrogenase [NADP(+)]	36.5	6.4	328.4	6	21.5	13.62	0.506494	27	36.97	0.758065	27	21.61	1.40909	26	24.48
AK1BA_HUMAN	Aldo-keto reductase family 1 member B10	36.0	8.7	330.2	6	20.6	17.36	0.688312	11	46.43	0.854839	11	32.03	1.14205	11	40.78
AK1BF_HUMAN	Aldo-keto reductase family 1 member B15	39.4	6.0	125.6	3	8.7	15.91	0.532468	9	27.49	0.725806	9	14.95	1.23295	9	37.03
AK1C3_HUMAN	Aldo-keto reductase family 1 member C3	36.8	9.0	194.1	5	22.9	15.16	1.05195	8	8.54	1.01613	10	25.7	0.994318	9	49.48
AKAP4_HUMAN	A-kinase anchor protein 4	94.4	6.6	313.5	6	9.3	14.04	1.35065	23	63.91	0.693548	28	48.73	0.5	24	49.85
AKAP9_HUMAN	A-kinase anchor protein 9	453.4	4.8	119.1	2	0.3	41.80	0.987013	3	233.58	0.782258	3	31.58	0.727273	3	148.97
AL1A1_HUMAN	Retinal dehydrogenase 1	54.8	6.3	287.8	7	14.4	7.83	0.493506	18	53.15	0.741935	18	37.7	1.36364	18	50.85
AL5AP_HUMAN	Arachidonate 5-lipoxygenase-activating protein	18.1	9.3	52.7	1	8.1	8.30	1.19481	6	42.29	1.14516	6	24.73	0.880682	6	47.62
AL9A1_HUMAN	4-trimethylaminobutyraldehyde dehydrogenase	53.8	5.6	159.9	3	5.7	10.10	0.441558	8	17.23	1.1129	9	97.99	1.81818	9	62.82
ALBU_HUMAN	Serum albumin	69.3	5.9	12611.7	238	90.1	12.74	1.97403	8445	50.28	0.830645	8335	52.03	0.397727	8768	49.27
ALDOA_HUMAN	Fructose-bisphosphate aldolase A	39.4	9.2	683.2	12	41.5	12.42	0.896104	39	36.19	0.758065	40	32.8	0.789773	40	54
ALDOB_HUMAN	Fructose-bisphosphate aldolase B	39.4	9.0	944.8	16	42.6	133.31	0.532468	86	60.79	0.604839	83	39.66	1.03409	82	39.45
ALS_HUMAN	Insulin-like growth factor-binding protein complex acid labile subunit	66.0	6.4	358.4	7	16.9	12.93	1.14286	26	38.65	1.70161	26	23.84	1.34659	26	32.45
AMBP_HUMAN	Protein AMBP	39.0	5.9	2012.7	33	45.7	10.31	1.46753	589	56.07	1.87097	586	57.18	1.125	754	48.17
AMD_HUMAN	Peptidyl-glycine alpha-amidating monooxygenase	108.3	6.0	42	1	3.0	18.77	0.428571	2	34.62	0.483871	2	15.01	1.03977	2	51.57
AMER2_HUMAN	APC membrane recruitment protein 2	69.5	6.6	31.2	1	1.0	16.57	0.922078	7	16.94	2.6371	7	12.2	2.60795	7	11.99
AMPE_HUMAN	Glutamyl aminopeptidase	109.2	5.2	1403.7	31	30.7	10.80	0.896104	114	37.61	1.45161	125	28.16	1.50568	116	49.24
AMPL_HUMAN	Cytosol aminopeptidase	56.1	9.0	150	3	7.3	276.17	1.31169	6	66.33	0.91129	6	14.95	0.636364	6	83.34
AMPN_HUMAN	Aminopeptidase N	109.5	5.2	3836.4	64	46.2	12.20	0.428571	496	56.6	0.637097	521	34.02	1.32386	497	54.57
AMY1_HUMAN	Alpha-amylase 1	57.7	6.5	2157.9	39	60.9	14.51	0.350649	351	80.42	0.524194	354	45.81	1.40341	349	52.77
AMY2B_HUMAN	Alpha-amylase 2B	57.7	6.7	2390.7	43	67.9	45.29	0.350649	364	82.54	0.508065	364	47.09	1.34659	357	55.09
AMYP_HUMAN	Pancreatic alpha-amylase	57.7	6.7	2443.7	44	61.6	35.66	0.350649	387	84.65	0.516129	398	47.66	1.375	375	57.02
AN30B_HUMAN	Ankyrin repeat domain-containing protein 30B	157.9	6.0	86.1	3	1.2	846.24	1.41558	9	16.11	1.33871	9	15.31	0.863636	9	15.98
ANAG_HUMAN	Alpha-N-acetylglucosaminidase	82.2	6.2	1604.8	28	44.8	10.66	0.493506	205	51.04	0.637097	204	26.45	1.19318	205	47.64
ANGL2_HUMAN	Angiopoietin-related protein 2	57.1	7.8	405.5	9	19.5	10.80	0.415584	22	32.23	1.25806	22	32.51	2.38068	24	63.02
ANGT_HUMAN	Angiotensinogen	53.1	5.9	1659.7	26	32.8	11.57	1.38961	270	37.45	1.84677	283	64.11	1.21591	279	53.39
ANK1_HUMAN	Ankyrin-1	206.1	5.6	64.5	1	1.4	16.82	0.74026	3	17.86	1.08065	3	2.75	1.32955	3	19.78
ANK3_HUMAN	Ankyrin-3	480.1	6.1	115.9	3	0.6	412.92	3.01299	5	56.8	1.64516	5	19.98	0.5	5	51.81
ANR11_HUMAN	Ankyrin repeat domain-containing protein 11	297.7	6.7	55.1	1	0.3	31.98	1.83117	5	21.34	1.25	5	22.2	0.625	5	10.05
ANR32_HUMAN	Ankyrin repeat domain-containing protein 32	121.0	9.5	74.4	2	0.7	952.48	2.32468	16	27.79	0.870968	16	40.44	0.340909	16	19.03
ANR44_HUMAN	Serine/threonine-protein phosphatase 6 regulatory ankyrin repeat subunit B	107.5	5.8	83.7	2	0.5	44.75	1.25974	2	20.84	0.282258	2	23.93	0.204545	2	2.98
ANR62_HUMAN	Ankyrin repeat domain-containing protein 62	106.4	6.2	70.2	2	1.9	412.36	0.636364	3	10.01	0.233871	3	47.71	0.340909	3	39.06
ANT3_HUMAN	Antithrombin-III	52.6	6.3	2297.4	46	55.4	12.82	2.76623	300	46.88	1.57258	297	64.17	0.522727	311	47.05
ANTR1_HUMAN	Anthrax toxin receptor 1	62.7	8.6	345.8	7	10.8	25.94	0.844156	17	18.6	0.983871	22	87.88	1.14205	19	93.91
ANX10_HUMAN	Annexin A10	37.3	5.0	64.8	1	7.1	14.20	1.03896	2	3.79	1.10484	2	0.29	0.965909	2	3.5
ANX11_HUMAN	Annexin A11	54.4	8.5	395.7	9	19.2	9.28	0.428571	23	43.28	0.685484	24	44.01	1.40909	23	32.39
ANXA1_HUMAN	Annexin A1	38.7	6.7	1064.3	18	50.0	13.11	0.402597	98	56.43	0.314516	95	62.7	0.698864	95	21.89
ANXA2_HUMAN	Annexin A2	38.6	8.5	1225.3	25	63.7	10.53	0.363636	82	75.55	0.395161	84	65.05	1.03409	81	50.84
ANXA3_HUMAN	Annexin A3	36.4	5.5	651.2	13	41.8	12.78	1	29	29.93	1.30645	30	40.12	1.1875	29	37.48
ANXA4_HUMAN	Annexin A4	35.9	5.8	706.2	15	46.4	10.58	0.402597	49	56.74	0.790323	49	47.92	1.82386	49	48.46
ANXA5_HUMAN	Annexin A5	35.9	4.8	812	15	42.2	10.64	0.337662	76	47.28	0.508065	77	43.85	1.40909	78	59.35
ANXA6_HUMAN	Annexin A6	75.8	5.3	748.7	15	27.0	9.13	0.688312	39	42.36	0.790323	39	55.46	1.05114	39	45.23
ANXA7_HUMAN	Annexin A7	52.7	5.4	96.8	2	4.1	10.14	0.519481	4	37.32	0.669355	4	38.73	1.19318	4	7.18
AP1B1_HUMAN	AP-1 complex subunit beta-1	104.6	4.8	103.4	2	3.4	261.40	0.623377	8	56.16	0.903226	10	28.67	1.30682	8	53.48
AP2B1_HUMAN	AP-2 complex subunit beta	104.5	5.1	111.9	3	2.8	319.90	1.68831	7	146.07	1.37097	7	61.11	0.744318	7	58.98
AP2E_HUMAN	Transcription factor AP-2-epsilon	46.2	9.5	33.1	1	1.6	9.29	1.31169	5	15.26	1.83871	5	10.75	1.27841	5	13.01
APAF_HUMAN	Apoptotic protease-activating factor 1	141.7	5.9	60.5	2	1.3	304.54	0.480519	6	300.71	0.741935	6	65.77	1.42045	6	116.35
API5_HUMAN	Apoptosis inhibitor 5	59.0	7.7	58.4	2	3.4	705.18	0.961039	2	178.61	1.22581	2	63.02	1.15909	2	68.29
APOA_HUMAN	Apolipoprotein(a)	501.0	5.5	50.6	1	0.2	4.37	0.350649	8	43.09	0.83871	8	11.76	2.17045	8	53.39
APOA1_HUMAN	Apolipoprotein A-I	30.8	5.5	2430.2	45	76.4	10.33	2.46753	327	47.64	3.25806	329	95.19	1.25	332	71.37
APOA2_HUMAN	Apolipoprotein A-II	11.2	7.1	441.9	8	69.0	9.91	1.33766	45	20.4	2.66129	46	72.63	1.75568	51	82.63
APOA4_HUMAN	Apolipoprotein A-IV	45.4	5.2	1677.4	32	64.9	11.12	2.83117	165	48.09	2.18548	165	64.26	0.727273	164	38.29
APOB_HUMAN	Apolipoprotein B-100	515.3	6.6	3990.7	79	21.8	11.86	1.36364	200	50.96	3.68548	210	99.07	2.54545	220	68.51
APOC1_HUMAN	Apolipoprotein C-I	9.3	9.3	76.4	1	10.8	9.43	2.19481	4	10.37	4.25	4	16.23	1.77273	4	10.14
APOC3_HUMAN	Apolipoprotein C-III	10.8	5.1	192.6	4	34.3	11.88	1.01299	10	27.51	1.37097	10	39.98	1.23864	10	18.6
APOD_HUMAN	Apolipoprotein D	21.3	4.9	804.6	13	38.1	12.77	1.20779	123	44.45	2.87903	122	48.68	2.18182	123	40.69
APOE_HUMAN	Apolipoprotein E	36.1	5.5	338.2	6	24.9	11.11	1.12987	18	52.97	1.37097	19	23.31	1.03977	17	33.95
APOH_HUMAN	Beta-2-glycoprotein 1	38.3	9.5	338.6	7	23.5	15.56	1.11688	46	76.73	1.29839	49	77.11	1.19886	45	48.89
APOL1_HUMAN	Apolipoprotein L1	43.9	5.5	113.9	2	7.8	16.15	1.7013	2	14.85	0.75	2	47.12	0.397727	2	30.69
APOM_HUMAN	Apolipoprotein M	21.2	5.6	142.4	3	30.9	7.32	1.93506	8	14.85	0.814516	8	46.85	0.4375	9	73.64
AQP1_HUMAN	Aquaporin-1	28.5	7.8	82.2	1	7.4	8.32	0.61039	8	83.09	0.612903	8	55.57	0.926136	8	24.09
AQP2_HUMAN	Aquaporin-2	28.8	6.5	55.9	1	3.7	12.67	0.298701	2	0.16	0.314516	2	1.83	0.948864	2	1.68
AR13B_HUMAN	ADP-ribosylation factor-like protein 13B	48.6	6.2	27	1	1.6	59.11	1.94805	2	9.42	0.709677	2	55.89	0.335227	2	44.77
ARF3_HUMAN	ADP-ribosylation factor 3	20.6	7.7	337.6	5	34.3	12.30	0.649351	27	46.23	0.596774	27	91.24	0.835227	27	48.49
ARF5_HUMAN	ADP-ribosylation factor 5	20.5	6.4	210.3	4	23.9	14.45	0.714286	19	48.03	0.806452	19	68.86	1.02841	19	32.65
ARGAL_HUMAN	Rho guanine nucleotide exchange factor 10-like protein	140.3	5.5	26.6	1	1.0	3.34	13.3377	4	7.11	3.87903	4	2.8	0.267045	4	4.42
ARHGH_HUMAN	Rho guanine nucleotide exchange factor 17	221.5	5.9	91.6	3	1.1	895.42	1.50649	13	42.71	0.733871	13	34.3	0.443182	13	51.28
ARIP4_HUMAN	Helicase ARIP4	162.7	5.7	79.7	3	1.3	1076.85	0.883117	3	70.58	0.725806	2	0.66	0.852273	2	86.01
ARK72_HUMAN	Aflatoxin B1 aldehyde reductase member 2	39.6	6.8	117.8	2	9.5	11.54	0.519481	4	8.58	0.637097	4	7.7	1.13636	4	4.89
ARK73_HUMAN	Aflatoxin B1 aldehyde reductase member 3	37.2	6.8	170	3	12.1	12.52	0.857143	14	45.16	0.709677	13	23.39	0.840909	14	31.09
ARL8A_HUMAN	ADP-ribosylation factor-like protein 8A	21.4	8.9	59.4	2	15.1	8.17	0.649351	2	4.65	1.02419	2	114.38	1.45455	2	106.06
ARMC2_HUMAN	Armadillo repeat-containing protein 2	96.8	9.5	54.7	1	2.0	389.31	1.55844	2	13.12	3.24194	2	0.01	1.90909	2	13.13
ARP2_HUMAN	Actin-related protein 2	44.7	6.3	58	1	3.0	10.42	1.02597	2	10.28	1.40323	2	0.95	1.24432	2	11.24
ARPC2_HUMAN	Actin-related protein 2/3 complex subunit 2	34.3	7.0	134.3	3	10.3	5.16	1.84416	4	12.66	2.00806	4	35.11	0.994318	4	23.06
ARPC3_HUMAN	Actin-related protein 2/3 complex subunit 3	20.5	9.5	44.1	1	6.2	5.98	1.49351	4	10.36	0.741935	4	23.44	0.454545	4	14.08
ARPC4_HUMAN	Actin-related protein 2/3 complex subunit 4	19.7	9.4	55.5	1	4.8	5.22	0.74026	3	25.62	0.951613	3	8.23	1.17045	3	24.35
ARRD3_HUMAN	Arrestin domain-containing protein 3	46.4	6.2	27.1	1	1.7	3.94	2.33766	3	6.46	0.653226	3	3.76	0.255682	3	8.25
ARSA_HUMAN	Arylsulfatase A	53.6	5.6	812.7	15	31.8	12.02	0.662338	72	49.57	0.846774	70	43.37	1.07386	72	38.34
ARSF_HUMAN	Arylsulfatase F	65.9	6.9	52.8	1	1.7	13.51	0.298701	2	5.9	0.33871	2	10.46	1.0625	2	16.43
ASAH1_HUMAN	Acid ceramidase	44.6	8.6	1263.8	24	48.9	10.36	0.727273	145	31.99	0.75	145	36.95	0.943182	146	38.38
ASC_HUMAN	Apoptosis-associated speck-like protein containing a CARD	21.6	5.9	113.9	2	14.4	257.74	2.85714	4	18.26	2.21774	4	45.05	0.710227	4	40.88
ASGL1_HUMAN	Isoaspartyl peptidase/L-asparaginase	32.0	5.8	60.8	2	5.5	30.79	1.44156	2	45.28	1.17742	2	37.45	0.744318	2	6.97
ASGR2_HUMAN	Asialoglycoprotein receptor 2	35.1	5.8	125.9	2	9.6	13.34	1.18182	3	2.31	1.41935	7	26.91	1.44886	3	3.93
ASM3A_HUMAN	Acid sphingomyelinase-like phosphodiesterase 3a	51.2	5.9	111.8	3	9.7	264.15	1.03896	5	17.15	0.879032	5	39.02	0.772727	5	26
ASPG_HUMAN	N(4)-(beta-N-acetylglucosaminyl)-L-asparaginase	37.2	5.8	75.4	1	3.5	15.36	0.61039	9	16.21	0.580645	9	23.84	0.869318	9	15.43
ASPM_HUMAN	Abnormal spindle-like microcephaly-associated protein	409.5	11.2	120.9	1	0.2	922.12	3.41558	6	22.48	1.66129	6	16.5	0.443182	6	8.3
ASSY_HUMAN	Argininosuccinate synthase	46.5	8.9	126.8	4	8.7	11.91	0.558442	13	29.98	0.540323	13	13.57	0.880682	13	38.61
AT1A1_HUMAN	Sodium/potassium-transporting ATPase subunit alpha-1	112.8	5.2	447.9	8	9.8	10.44	0.493506	26	37.15	0.66129	26	25.72	1.19318	25	22.89
AT1B1_HUMAN	Sodium/potassium-transporting ATPase subunit beta-1	35.0	9.4	56.2	1	4.6	13.61	0.493506	5	17.21	0.564516	5	2.45	1.0625	5	17.65
ATD3A_HUMAN	ATPase family AAA domain-containing protein 3A	71.3	9.7	25.7	1	1.3	6.77	13.5325	2	39.06	10.629	2	34.74	0.715909	2	3.92
ATNG_HUMAN	Sodium/potassium-transporting ATPase subunit gamma	7.3	9.2	56.5	1	21.2	9.69	0.480519	4	11.34	0.483871	4	12.34	0.914773	4	2.25
ATPA_HUMAN	ATP synthase subunit alpha, mitochondrial	59.7	9.6	183.1	4	12.3	18.09	0.753247	11	63.15	0.83871	11	93.82	1.18182	11	23.8
ATPB_HUMAN	ATP synthase subunit beta, mitochondrial	56.5	5.1	355.9	6	18.3	11.48	0.987013	23	38.11	1.45161	23	36.78	1.34091	23	49.8
ATPD_HUMAN	ATP synthase subunit delta, mitochondrial	17.5	5.2	53	1	8.3	15.97	2.79221	2	1.12	3.05645	2	2.03	1	2	3.16
ATR_HUMAN	Serine/threonine-protein kinase ATR	301.2	7.3	76.8	3	1.3	258.81	1.35065	8	70.33	0.298387	8	25.39	0.198864	8	51.25
ATRN_HUMAN	Attractin	158.4	7.9	510	11	6.5	11.48	1.36364	28	20.33	0.709677	28	32.89	0.477273	28	26.46
ATS1_HUMAN	A disintegrin and metalloproteinase with thrombospondin motifs 1	105.3	6.4	138	2	5.3	9.52	0.857143	9	43.61	1.33871	10	33.74	1.40909	10	37.65
ATS5_HUMAN	A disintegrin and metalloproteinase with thrombospondin motifs 5	101.7	10.2	60.3	1	0.9	894.17	2.32468	4	3.13	1.40323	4	32.25	0.551136	4	35.47
ATX2_HUMAN	Ataxin-2	140.2	10.2	54.7	1	0.5	752.06	0.714286	3	15.92	2.32258	3	12.04	2.96023	3	4.23
AURKA_HUMAN	Aurora kinase A	45.8	10.1	27.3	1	3.5	645.78	0.155844	5	23.7	0.322581	5	5.56	1.97727	5	22.18
B2MG_HUMAN	Beta-2-microglobulin	13.7	6.1	889.7	15	63.0	82.11	1.62338	182	45.03	3.16129	191	135.87	2.03409	215	107.57
B3AT_HUMAN	Band 3 anion transport protein	101.7	4.9	424.4	9	13.2	11.72	1.50649	29	34.68	4.79839	29	79.39	2.65909	32	71.79
B3GN1_HUMAN	N-acetyllactosaminide beta-1,3-N-acetylglucosaminyltransferase	47.1	6.9	149.4	4	17.6	11.24	0.818182	11	31.37	0.91129	11	21.28	1.02273	11	31.61
B4GT1_HUMAN	Beta-1,4-galactosyltransferase 1	43.9	9.6	262.5	5	14.8	9.80	0.805195	18	33.53	1.37903	18	42.28	1.38636	18	40.24
BAF_HUMAN	Barrier-to-autointegration factor	10.1	5.8	99.1	2	18.0	16.80	0.324675	5	37.95	0.443548	5	80.57	1.25	5	145.68
BASP1_HUMAN	Brain acid soluble protein 1	22.7	4.5	400.4	6	30.4	9.94	0.285714	16	60.07	0.193548	16	57.94	0.619318	16	52.32
BAZ1A_HUMAN	Bromodomain adjacent to zinc finger domain protein 1A	178.6	6.2	82.7	2	0.8	25.04	1.19481	2	61.38	4.84677	2	71.04	3.72727	2	7.39
BAZ1B_HUMAN	Tyrosine-protein kinase BAZ1B	170.8	9.4	54.1	2	1.4	32.51	0.584416	2	154.92	0.298387	2	4.67	0.465909	2	143.98
BBS7_HUMAN	Bardet-Biedl syndrome 7 protein	80.3	5.6	67.2	1	1.1	1.56	0.454545	3	13.91	1.92742	3	0.76	3.86364	3	13.98
BCAM_HUMAN	Basal cell adhesion molecule	67.4	5.5	497.5	9	18.0	7.79	0.61039	19	61.82	0.717742	19	40.65	1.07386	19	42.55
BCD1_HUMAN	Box C/D snoRNA protein 1	53.9	5.5	26.7	1	2.1	10.13	3.48052	3	72.36	2.69355	3	101.55	0.710227	3	25.18
BGAL_HUMAN	Beta-galactosidase	76.0	6.1	816.6	16	30.1	10.28	0.532468	69	25.11	0.419355	71	40.47	0.715909	71	28.95
BGH3_HUMAN	Transforming growth factor-beta-induced protein ig-h3	74.6	8.6	275.4	6	11.7	12.41	2	15	33.09	1.41129	16	40.32	0.676136	18	39.66
BGLR_HUMAN	Beta-glucuronidase	74.7	6.6	861.7	18	32.7	14.70	0.571429	82	60.93	0.798387	86	32.26	1.26136	87	49.54
BHMT1_HUMAN	Betaine--homocysteine S-methyltransferase 1	45.0	6.7	327.7	7	20.0	8.80	0.428571	23	71.12	0.604839	24	47.96	1.15909	24	82.61
BICR1_HUMAN	Bicaudal D-related protein 1	64.8	4.8	40.6	1	1.7	18.97	0.987013	4	6.05	0.58871	4	5.1	0.545455	4	5.12
BID_HUMAN	BH3-interacting domain death agonist	22.0	5.1	417.4	6	41.0	14.86	0.532468	30	47.62	0.83871	30	28.69	1.34091	29	36.57
BIG1_HUMAN	Brefeldin A-inhibited guanine nucleotide-exchange protein 1	208.6	5.5	80.9	2	1.7	774.40	1.36364	2	13.35	1.09677	2	77.72	0.732955	2	60
BIRC3_HUMAN	Baculoviral IAP repeat-containing protein 3	68.3	5.7	29.2	1	3.1	360.66	1.18182	4	63.59	0.887097	11	61.11	0.471591	4	27.93
BLVRB_HUMAN	Flavin reductase (NADPH)	22.1	7.9	272.4	6	38.3	353.09	1.23377	20	126.18	1.41129	19	14.33	1.07955	20	108
BOD1_HUMAN	Biorientation of chromosomes in cell division protein 1	19.2	5.9	54.1	2	4.9	28.78	3	2	38.42	4.25806	2	130.94	1.29545	2	69.57
BPI_HUMAN	Bactericidal permeability-increasing protein	53.9	9.9	62.7	2	6.2	14.32	2.44156	2	35.87	1.95968	2	52.61	0.738636	2	14.72
BPIB1_HUMAN	BPI fold-containing family B member 1	52.4	6.9	93.6	3	9.7	204.99	0.87013	3	20.49	1.41935	3	2.21	1.48864	3	21.24
BRAF_HUMAN	Serine/threonine-protein kinase B-raf	84.4	7.9	33	1	1.2	31.64	1.09091	6	10.76	1.47581	6	17.85	1.23295	6	8.05
BRDT_HUMAN	Bromodomain testis-specific protein	107.9	9.7	28.2	1	0.8	9.69	2	6	16.24	5.17742	6	31.75	2.375	6	17.21
BROX_HUMAN	BRO1 domain-containing protein BROX	46.4	8.5	371.5	7	26.5	13.10	0.363636	18	63.95	0.467742	18	64.21	1.26136	17	38.53
BST1_HUMAN	ADP-ribosyl cyclase 2	35.7	9.1	159.9	4	13.8	12.09	1.33766	12	41.31	1.18548	11	24.01	0.676136	12	47.3
BT2A1_HUMAN	Butyrophilin subfamily 2 member A1	59.6	6.1	240.1	5	5.3	11.51	0.415584	20	36.97	0.612903	20	17.19	1.38068	20	38.45
BTD_HUMAN	Biotinidase	61.1	5.8	1125.8	18	26.7	16.05	1.19481	152	28.32	0.806452	162	41.99	0.625	153	32.53
C1QC_HUMAN	Complement C1q subcomponent subunit C	25.8	9.4	74.1	2	8.6	4.93	0.584416	6	54.94	2.06452	6	8.64	3.19318	6	53.85
C1QR1_HUMAN	Complement component C1q receptor	68.5	5.2	87.6	2	4.1	19.23	1.36364	3	41.84	1.24194	3	34.35	0.835227	3	19.24
C1R_HUMAN	Complement C1r subcomponent	80.1	5.8	145.4	3	7.4	12.35	0.441558	24	72.81	0.677419	24	90.47	1.39205	24	36.95
C1RL_HUMAN	Complement C1r subcomponent-like protein	53.5	6.9	610.1	9	19.9	9.63	0.779221	70	87.03	0.733871	73	78.73	0.857955	69	59.4
C1S_HUMAN	Complement C1s subcomponent	76.6	4.7	324.4	8	13.2	139.84	0.935065	18	103.24	1.29032	18	49.09	1.27273	18	71.28
C4BPA_HUMAN	C4b-binding protein alpha chain	67.0	7.9	103	3	6.7	29.43	0.441558	12	196.3	1.20161	12	141.04	2.50568	12	27.83
CA123_HUMAN	UPF0587 protein C1orf123	18.0	4.8	88.2	2	20.6	15.00	1.72727	4	17.36	1.43548	4	7.39	0.755682	4	23.08
CA196_HUMAN	Putative uncharacterized protein C1orf196	14.2	9.1	32.1	1	11.2	9.21	1.71429	6	23.54	0.467742	6	21.18	0.25	6	24.75
CAB39_HUMAN	Calcium-binding protein 39	39.8	6.5	140.4	4	10.9	566.40	1.12987	11	130.45	0.645161	11	43.3	0.522727	11	69.08
CAB45_HUMAN	45 kDa calcium-binding protein	41.8	4.6	27.3	1	1.9	614.01	0.584416	3	7.19	0.830645	3	14.62	1.28409	3	8.05
CABYR_HUMAN	Calcium-binding tyrosine phosphorylation-regulated protein	52.7	4.4	31.4	1	1.2	1000.44	2.23377	10	26.64	1.25806	10	25.09	0.517045	10	14.54
CAC1S_HUMAN	Voltage-dependent L-type calcium channel subunit alpha-1S	212.2	6.2	33.8	1	0.5	9.97	1.50649	3	8.62	3.27419	3	6.58	1.98295	3	2.05
CAD11_HUMAN	Cadherin-11	87.9	4.6	687.5	12	21.0	11.02	0.805195	50	38.17	1.1129	49	43.46	1.27273	49	44.01
CAD13_HUMAN	Cadherin-13	78.2	4.7	789.7	13	19.4	10.43	1	87	48.46	1.16935	88	48.08	1.09659	89	31.18
CAD15_HUMAN	Cadherin-15	88.9	4.7	233.5	6	10.0	11.43	0.454545	10	80.92	0.637097	10	69.76	1.27841	10	42.98
CAD16_HUMAN	Cadherin-16	89.9	4.7	58.5	1	1.6	12.59	0.688312	3	20.91	0.758065	3	6.86	1.00568	3	14.76
CAD19_HUMAN	Cadherin-19	86.9	4.5	63.2	1	1.3	14.47	0.467532	2	38.11	0.564516	2	9.13	1.09091	2	28.25
CADH1_HUMAN	Cadherin-1	97.4	4.4	1344	23	29.6	10.63	0.935065	127	37.49	1.45968	127	36.52	1.45455	128	37.28
CADH2_HUMAN	Cadherin-2	99.7	4.5	572.1	10	16.6	102.92	0.74026	75	49.06	0.758065	79	39.22	0.954545	73	35.01
CADH3_HUMAN	Cadherin-3	91.4	4.5	98.4	2	3.0	11.54	0.701299	7	27.77	1.54032	7	19.46	2.00568	7	19.04
CADH5_HUMAN	Cadherin-5	87.5	5.1	336.9	8	9.2	12.23	1.14286	22	42.36	1.15323	21	47.65	0.903409	21	21.66
CADH6_HUMAN	Cadherin-6	88.3	4.6	460.8	9	12.0	8.20	0.571429	23	41.28	0.717742	24	29.69	1.15341	23	23.69
CADM1_HUMAN	Cell adhesion molecule 1	48.5	4.8	107.7	2	4.8	13.76	0.454545	5	14.03	0.733871	5	11.9	1.47727	5	7.4
CADM3_HUMAN	Cell adhesion molecule 3	43.3	5.7	251.2	5	16.6	9.00	1.44156	16	32.4	2.28226	16	38.6	1.44886	16	31.09
CADM4_HUMAN	Cell adhesion molecule 4	42.8	5.9	322.9	6	14.9	12.71	0.38961	32	32.31	0.653226	31	19.62	1.47159	32	36.37
CAH1_HUMAN	Carbonic anhydrase 1	28.9	6.7	1180.3	20	68.2	14.75	1.55844	184	41.62	3.75806	189	79.29	2.24432	190	52.28
CAH2_HUMAN	Carbonic anhydrase 2	29.2	7.0	715.6	14	58.1	13.19	0.441558	72	77.88	0.951613	75	23.35	2	72	79.77
CAH4_HUMAN	Carbonic anhydrase 4	35.0	8.8	26.5	1	3.8	5.70	1.01299	2	0.04	0.725806	2	0.62	0.653409	2	0.57
CALB1_HUMAN	Calbindin	30.0	4.6	214.2	4	21.1	6.83	0.545455	10	47.64	0.75	9	9.08	1.34659	10	42.26
CALCA_HUMAN	Calcitonin gene-related peptide 1	13.9	10.4	51	1	7.8	14.47	0.181818	2	8.6	0.443548	2	2.62	2.21591	2	5.98
CALL3_HUMAN	Calmodulin-like protein 3	16.9	4.1	207	4	31.5	8.41	0.350649	12	37.67	0.370968	12	31.48	0.954545	12	23.6
CALM_HUMAN	Calmodulin	16.8	3.9	485	10	74.5	7.32	0.766234	23	38.43	1.22581	23	27.35	1.44886	24	34.99
CALR_HUMAN	Calreticulin	48.1	4.1	881.8	16	52.5	11.74	1.7013	73	26.34	1.58065	73	30.03	0.846591	76	24.3
CALX_HUMAN	Calnexin	67.5	4.3	486.4	11	22.0	12.38	1.41558	30	60.84	1.99194	30	42.36	1.28977	30	67.59
CAMP_HUMAN	Cathelicidin antimicrobial peptide	19.3	10.3	51.4	1	5.3	12.58	1.23377	17	38.49	2.35484	17	26.23	1.75568	17	25.12
CAN1_HUMAN	Calpain-1 catalytic subunit	81.8	5.4	141.7	3	5.5	14.24	0.636364	7	51.53	0.572581	7	27.18	0.8125	7	24.6
CAN10_HUMAN	Calpain-10	74.9	9.2	28	1	1.6	637.76	1.46753	3	115.94	0.887097	3	459.9	0.551136	3	101.33
CAN12_HUMAN	Calpain-12	81.0	5.9	132.4	4	1.9	620.60	1.19481	27	141.47	0.33871	27	250.88	0.255682	27	64.58
CAN2_HUMAN	Calpain-2 catalytic subunit	79.9	4.7	140.9	2	2.1	15.09	0.233766	4	12.97	0.346774	4	12.81	1.38636	4	22.26
CAN7_HUMAN	Calpain-7	92.6	8.3	44.2	1	1.4	15.33	0.597403	2	11.74	0.580645	2	7.46	0.886364	2	4.25
CAND1_HUMAN	Cullin-associated NEDD8-dissociated protein 1	136.3	5.4	89.5	2	2.7	6.79	1.07792	7	27.22	1.12097	7	47.48	0.948864	7	32.43
CAP1_HUMAN	Adenylyl cyclase-associated protein 1	51.9	9.1	541.8	12	29.3	13.52	1.49351	26	30.47	1.51613	26	22.83	0.903409	30	36.34
CAP7_HUMAN	Azurocidin	26.9	11.9	69.7	1	5.2	8.48	3.94805	4	23.04	2.83065	4	14.7	0.653409	4	20.08
CAPG_HUMAN	Macrophage-capping protein	38.5	5.8	287.5	6	21.0	11.41	0.844156	18	57.89	0.685484	18	60.19	0.744318	18	40.1
CAPZB_HUMAN	F-actin-capping protein subunit beta	31.3	5.2	106.3	2	7.6	13.66	0.961039	6	17.54	0.903226	6	22.46	0.863636	6	24.8
CASC4_HUMAN	Protein CASC4	48.8	5.5	28.2	1	2.8	5.31	1.23377	3	46.46	0.491935	3	49.82	0.363636	3	5.49
CATA_HUMAN	Catalase	59.7	7.0	871.9	17	43.5	12.62	1.33766	44	51.06	3.19355	44	72.63	2.17045	52	50.25
CATB_HUMAN	Cathepsin B	37.8	5.9	322.5	7	19.5	82.53	0.831169	29	32.79	1.09677	29	42.84	1.21023	29	48.26
CATC_HUMAN	Dipeptidyl peptidase 1	51.8	6.6	626.6	13	25.3	10.90	0.805195	77	40.48	1.03226	78	52.84	1.15341	78	51.71
CATD_HUMAN	Cathepsin D	44.5	6.1	1269.4	26	52.9	13.98	0.714286	167	43.89	0.919355	168	29.47	1.20455	168	36.56
CATG_HUMAN	Cathepsin G	28.8	12.1	63.7	2	7.1	5.84	0.649351	5	20.2	0.693548	5	9.98	0.971591	5	30.34
CATH_HUMAN	Pro-cathepsin H	37.4	9.3	268	6	16.4	170.30	1.15584	21	18.77	1.67742	21	38.04	1.34091	21	29.8
CATIN_HUMAN	Cactin	88.6	9.6	25.3	1	0.9	1301.81	2.42857	3	6.66	0.677419	3	7.53	0.255682	3	9.94
CATL1_HUMAN	Cathepsin L1	37.5	5.2	349.5	6	18.3	8.88	1	21	26.49	1.37097	21	24.34	1.25568	21	35.64
CATS_HUMAN	Cathepsin S	37.5	9.4	45.9	1	3.3	10.48	1.32468	3	3.17	1.31452	3	2.92	0.903409	3	5.59
CATZ_HUMAN	Cathepsin Z	33.8	6.9	206.7	5	18.2	12.11	1.41558	33	35.74	1.45161	33	42.61	0.931818	33	32.15
CAZA1_HUMAN	F-actin-capping protein subunit alpha-1	32.9	5.4	115.4	2	11.2	199.09	0.727273	5	112.93	0.709677	4	167.97	0.676136	4	38.83
CAZA2_HUMAN	F-actin-capping protein subunit alpha-2	32.9	5.5	139.9	3	17.5	16.23	0.519481	6	75.98	0.540323	5	118.13	0.801136	5	42.75
CBG_HUMAN	Corticosteroid-binding globulin	45.1	5.6	1181.9	19	37.3	12.85	1.67532	222	29.88	0.967742	223	32.52	0.522727	217	19.09
CBPB2_HUMAN	Carboxypeptidase B2	48.4	8.5	60	2	3.3	12.56	1.11688	6	23.43	1.64516	6	15.48	1.35227	6	13.34
CBPE_HUMAN	Carboxypeptidase E	53.1	4.9	333	7	15.5	377.11	0.623377	28	131.84	0.733871	28	92	1.07386	28	58.52
CBPM_HUMAN	Carboxypeptidase M	50.5	7.1	924.9	17	30.9	10.74	0.350649	65	61.66	0.427419	63	30.37	1.15909	65	39.17
CBPN_HUMAN	Carboxypeptidase N catalytic chain	52.3	7.0	150.5	3	11.6	163.65	1.46753	4	109.33	1.04032	4	125.03	0.647727	4	20.99
CBPQ_HUMAN	Carboxypeptidase Q	51.9	5.8	733.2	12	29.4	11.06	0.701299	71	26.75	0.774194	69	33.15	0.971591	70	29.95
CBR1_HUMAN	Carbonyl reductase [NADPH] 1	30.4	9.5	122.7	3	14.1	6.18	0.402597	6	22.58	0.870968	6	27.35	1.96591	6	37.67
CBX3_HUMAN	Chromobox protein homolog 3	20.8	5.1	77.1	1	6.0	10.24	4.27273	2	6	3.03226	2	11.47	0.647727	2	5.44
CC168_HUMAN	Coiled-coil domain-containing protein 168	277.8	10.0	54.6	2	0.8	450.19	1.64935	2	8.88	1.35484	2	124.96	0.75	2	108.35
CC172_HUMAN	Coiled-coil domain-containing protein 172	31.0	4.9	51.6	2	2.3	863.02	8.7013	3	142.94	3	3	54.52	0.318182	3	59.46
CC175_HUMAN	Coiled-coil domain-containing protein 175	97.4	5.7	67.6	2	1.7	788.71	7.48052	7	122.1	2.54032	7	19.85	0.3125	7	107.97
CC180_HUMAN	Coiled-coil domain-containing protein 180	191.0	5.7	83.9	3	1.2	374.15	5.19481	4	80.88	1.57258	4	76.29	0.278409	4	101.9
CCD63_HUMAN	Coiled-coil domain-containing protein 63	66.2	9.6	90.5	2	3.2	454.32	1.90909	4	37.6	1.54032	4	9.78	0.738636	4	43.41
CCD65_HUMAN	Coiled-coil domain-containing protein 65	57.3	7.1	86.2	2	3.5	401.05	0.87013	3	29.19	0.733871	3	5.92	0.767045	3	23.73
CCD69_HUMAN	Coiled-coil domain-containing protein 69	34.8	5.5	45.4	1	2.7	31.68	1.22078	4	7.28	2.16129	4	18.53	1.61932	4	13.23
CCD73_HUMAN	Coiled-coil domain-containing protein 73	124.1	5.3	52.5	2	2.0	62.13	1.05195	2	42.32	1.33065	2	3.71	1.15909	2	46.56
CCDC8_HUMAN	Coiled-coil domain-containing protein 8	59.3	9.4	26.3	1	1.9	26.66	0.298701	2	6.24	0.322581	2	8.84	1	2	2.6
CD021_HUMAN	Uncharacterized protein C4orf21	119.3	4.8	31.1	1	0.6	56.93	2.64935	2	5.91	0.983871	2	1.44	0.340909	2	4.46
CD14_HUMAN	Monocyte differentiation antigen CD14	40.1	5.8	1165.2	20	54.1	12.12	0.753247	230	45.05	1.43548	272	65.2	1.65341	244	60.22
CD166_HUMAN	CD166 antigen	65.1	5.9	208	5	10.6	13.02	1.06494	11	26.23	0.927419	11	28.92	0.795455	11	32.7
CD248_HUMAN	Endosialin	80.8	5.1	268.4	7	7.8	10.41	0.753247	33	50.86	0.790323	33	40.69	0.960227	33	59.2
CD276_HUMAN	CD276 antigen	57.2	4.6	59.6	1	3.4	22.87	0.402597	8	24.31	0.379032	8	15.95	0.863636	8	22.67
CD302_HUMAN	CD302 antigen	26.2	4.3	75.9	1	8.2	11.12	2.42857	4	18.1	2.51613	4	6.31	0.948864	4	19.09
CD38_HUMAN	ADP-ribosyl cyclase 1	34.3	9.2	48	1	4.3	18.67	0.415584	5	60.64	0.41129	5	14.13	0.926136	5	46.93
CD44_HUMAN	CD44 antigen	81.5	5.0	317.7	6	7.4	17.36	0.402597	30	82.51	0.427419	29	62.54	1.03409	28	27.82
CD59_HUMAN	CD59 glycoprotein	14.2	6.1	63.4	2	15.6	15.60	1.16883	8	21.13	1.28226	8	42.29	1.00568	8	21.81
CD5L_HUMAN	CD5 antigen-like	38.1	5.2	27.6	1	2.0	7.10	1.51948	2	11.01	2.75806	2	7.88	1.65909	2	3.11
CD7_HUMAN	T-cell antigen CD7	25.4	7.8	33.1	1	9.2	10.50	0.688312	2	12.57	1.65323	2	0.7	2.22159	2	11.86
CD81_HUMAN	CD81 antigen	25.8	5.0	54.8	1	8.5	9.87	0.896104	2	1.97	1.12097	2	3.06	1.13636	2	1.09
CD9_HUMAN	CD9 antigen	25.4	7.7	101.1	2	7.5	9.16	0.298701	12	29.83	0.362903	12	39.52	1.14205	12	26.23
CDC16_HUMAN	Cell division cycle protein 16 homolog	71.6	5.5	34.7	1	1.6	568.68	1.22078	11	46.91	0.620968	11	52.63	0.465909	11	10.59
CDC42_HUMAN	Cell division control protein 42 homolog	21.2	6.2	153.6	3	20.4	13.00	0.779221	11	27.7	0.725806	11	31.3	0.846591	11	36.86
CDHR2_HUMAN	Cadherin-related family member 2	141.5	4.2	601.3	11	11.5	11.13	0.961039	45	36.47	0.959677	45	37.96	0.931818	44	23.3
CDHR5_HUMAN	Cadherin-related family member 5	88.2	4.7	289.9	6	10.5	13.42	0.324675	27	52.63	0.467742	26	34.53	1.31818	26	47.38
CE152_HUMAN	Centrosomal protein of 152 kDa	189.0	5.2	52.6	2	1.3	486.07	0.649351	2	49.6	0.532258	2	10.35	0.75	2	37.83
CE85L_HUMAN	Centrosomal protein of 85 kDa-like	91.8	5.9	56.7	2	1.6	1097.87	0.922078	3	46.49	0.580645	3	82.45	0.573864	3	30.12
CEL_HUMAN	Bile salt-activated lipase	79.3	5.0	637.2	12	20.3	13.03	0.441558	33	51.18	1.04839	33	32.32	2.19318	33	35.43
CELR2_HUMAN	Cadherin EGF LAG seven-pass G-type receptor 2	317.3	5.0	35.2	1	0.3	970.29	2.12987	19	28.86	0.685484	20	26.6	0.301136	19	28.97
CENPE_HUMAN	Centromere-associated protein E	316.2	5.4	119	3	0.5	649.53	1.49351	5	51.38	2.18548	4	158.48	1.45455	4	90.59
CENPF_HUMAN	Centromere protein F	367.5	4.9	161.2	2	0.4	26.16	1.93506	8	49.1	7.95161	8	64.38	3.76705	8	17.62
CENPP_HUMAN	Centromere protein P	33.1	5.9	29.7	1	3.5	22.47	0.415584	2	56.22	0.282258	2	15.82	0.613636	2	76.86
CEP44_HUMAN	Centrosomal protein of 44 kDa	44.1	5.0	83.2	2	4.9	767.10	2.1039	2	6.69	1.48387	2	63.1	0.647727	2	54.75
CERU_HUMAN	Ceruloplasmin	122.1	5.4	6389.1	121	56.3	15.80	2.46753	1063	52.03	1.30645	1068	70.42	0.505682	1137	42.07
CETP_HUMAN	Cholesteryl ester transfer protein	54.7	5.7	555.5	9	20.1	9.47	1.5974	37	33.44	1.81452	37	40.26	1.00568	37	43.38
CFAB_HUMAN	Complement factor B	85.5	6.7	1719.8	33	36.1	11.73	0.974026	132	39.67	2.17742	138	50.95	1.96591	140	57.38
CFAD_HUMAN	Complement factor D	27.0	9.1	322.2	5	26.5	18.42	1.11688	20	32.62	0.862903	20	45.12	0.704545	22	27.98
CFAH_HUMAN	Complement factor H	139.0	6.2	308.6	7	7.3	11.96	1.12987	16	47.89	2.08871	16	45.5	1.68182	16	42.64
CFAI_HUMAN	Complement factor I	65.7	9.0	378.3	6	12.5	12.91	0.948052	19	42.21	2.76613	23	39.42	2.34659	21	50.33
CG061_HUMAN	Uncharacterized protein C7orf61	23.8	11.2	30.9	1	2.9	35.63	2.57143	2	18.64	1.16129	2	38.65	0.414773	2	19
CH046_HUMAN	Uncharacterized protein C8orf46	22.6	10.7	30.5	1	3.4	21.35	0.207792	2	36.31	1.04839	2	10.7	4.55682	2	48.38
CH10_HUMAN	10 kDa heat shock protein, mitochondrial	10.9	9.4	130.1	2	25.5	11.53	1.45455	2	25.56	1.59677	2	18.53	1	2	45.68
CH3L1_HUMAN	Chitinase-3-like protein 1	42.6	9.4	143	3	8.4	6.51	1.49351	6	20.25	1.62903	6	22.08	0.994318	6	24.31
CH60_HUMAN	60 kDa heat shock protein, mitochondrial	61.0	5.6	117.8	2	4.4	11.62	1.58442	6	54.06	0.959677	6	105.27	0.556818	6	44.89
CHIT1_HUMAN	Chitotriosidase-1	51.6	6.7	190	2	9.0	13.60	2.64935	8	62.09	1.69355	8	27.99	0.642045	10	42.14
CHL1_HUMAN	Neural cell adhesion molecule L1-like protein	135.0	5.4	46.2	1	1.0	5.62	0.623377	6	35.01	0.846774	6	22.42	1.22727	6	29.4
CHLE_HUMAN	Cholinesterase	68.4	7.8	249.4	5	13.1	15.79	2.33766	16	58.81	1.28226	16	63.85	0.505682	17	30.1
CHM1B_HUMAN	Charged multivesicular body protein 1b	22.1	9.0	192.6	5	18.1	11.10	0.493506	15	41.88	0.419355	15	18.17	0.767045	15	35.9
CHM2A_HUMAN	Charged multivesicular body protein 2a	25.1	5.7	182.5	4	20.3	11.33	0.688312	12	58.19	0.66129	12	41.67	0.869318	12	37.28
CHM2B_HUMAN	Charged multivesicular body protein 2b	23.9	9.5	168.9	4	16.9	12.38	0.454545	5	25.96	0.532258	5	48.84	1.0625	5	46.87
CHMP5_HUMAN	Charged multivesicular body protein 5	24.6	4.5	150.8	3	14.2	5.47	0.415584	6	45.4	0.443548	6	47.85	0.988636	6	6.81
CHMP7_HUMAN	Charged multivesicular body protein 7	50.9	5.1	25.4	1	2.6	712.68	0.480519	4	8.24	0.33871	4	16.51	0.630682	4	13.46
CHSP1_HUMAN	Calcium-regulated heat stable protein 1	15.9	9.5	57.4	1	10.9	17.91	0.831169	3	7.75	0.572581	3	6.25	0.630682	3	2.91
CHSS1_HUMAN	Chondroitin sulfate synthase 1	91.7	9.9	30.5	1	0.9	29.70	0.844156	3	9.9	2.55645	3	14.68	2.78977	3	7.83
CHSTE_HUMAN	Carbohydrate sulfotransferase 14	43.0	10.2	26.4	1	2.1	819.21	2.67532	5	10.43	1.41935	5	20.41	0.482955	5	14.04
CILP1_HUMAN	Cartilage intermediate layer protein 1	132.5	9.7	123.7	3	3.8	12.82	0.766234	10	35.24	0.637097	10	23.91	0.767045	10	18.51
CILP2_HUMAN	Cartilage intermediate layer protein 2	126.2	9.8	128.1	3	4.1	9.54	0.779221	8	82.28	1.07258	8	27.3	1.25568	8	75.49
CJ062_HUMAN	Uncharacterized protein C10orf62	25.1	7.3	26.5	1	3.6	28.26	0.376623	2	18.05	0.306452	2	2.82	0.732955	2	15.17
CK054_HUMAN	Ester hydrolase C11orf54	35.1	6.3	285.2	6	19.4	11.38	0.519481	20	60.27	0.540323	19	37.24	1.01705	20	37.32
CK070_HUMAN	Uncharacterized protein C11orf70	30.8	6.4	27.8	1	4.9	568.54	1.63636	2	30.41	0.983871	2	18.54	0.545455	2	11.4
CLCA1_HUMAN	Calcium-activated chloride channel regulator 1	100.2	5.9	1190.4	21	23.0	9.17	1.32468	66	45.18	1.59677	75	67.17	1.06818	70	74.35
CLCA2_HUMAN	Calcium-activated chloride channel regulator 2	103.9	6.6	60.8	2	1.8	48.47	1.94805	5	33.46	2.37097	5	15.02	1.11932	5	19.48
CLCA4_HUMAN	Calcium-activated chloride channel regulator 4	101.2	5.2	175.8	4	5.0	12.60	3.15584	9	216.58	1.69355	11	23.51	0.517045	10	167.61
CLH1_HUMAN	Clathrin heavy chain 1	191.5	5.4	385	8	8.3	14.42	0.584416	11	44.64	0.774194	11	36.2	1.20455	11	69.92
CLIC1_HUMAN	Chloride intracellular channel protein 1	26.9	4.9	260.1	6	21.6	9.76	0.545455	19	48.84	0.677419	19	28.68	1.14205	19	36.11
CLIC4_HUMAN	Chloride intracellular channel protein 4	28.8	5.3	171.7	4	15.8	13.84	0.467532	11	17.28	0.540323	11	17.98	1.04545	11	26.91
CLIC6_HUMAN	Chloride intracellular channel protein 6	73.0	4.1	61.3	2	2.4	8.25	0.948052	3	57.38	0.459677	3	6.57	0.448864	3	50.93
CLM1_HUMAN	CMRF35-like molecule 1	32.3	5.4	68.5	1	3.8	10.14	0.818182	2	0.46	1.48387	2	2.28	1.64773	2	2.74
CLM2_HUMAN	CMRF35-like molecule 2	22.9	9.3	104.1	2	9.3	9.38	0.454545	16	24.37	0.693548	15	14.27	1.43182	16	27.27
CLMP_HUMAN	CXADR-like membrane protein	41.3	9.0	124.6	3	11.5	10.75	0.87013	14	14.51	1.35484	14	14.82	1.42045	14	25.38
CLN5_HUMAN	Ceroid-lipofuscinosis neuronal protein 5	41.5	7.7	86.9	2	5.0	326.70	1	4	22.18	0.959677	4	18.06	0.886364	4	15.92
CLSPN_HUMAN	Claspin	151.0	4.6	80.7	1	1.1	27.58	1.75325	3	6.49	1.97581	3	14.75	1.02841	3	11.68
CLU_HUMAN	Clustered mitochondria protein homolog	146.6	5.7	54.1	2	0.9	896.68	2.38961	4	97.88	1.70968	4	33.59	0.653409	4	52.8
CLUS_HUMAN	Clusterin	52.5	5.9	1145.4	22	33.2	132.03	1.16883	97	38.09	1.79032	100	61.49	1.41477	99	62.31
CMBL_HUMAN	Carboxymethylenebutenolidase homolog	28.0	6.9	334.8	6	29.0	11.43	0.597403	35	43.52	0.604839	37	42.41	0.914773	35	24.11
CMGA_HUMAN	Chromogranin-A	50.7	4.4	30.2	1	2.0	6.85	1.46753	4	7.4	1.30645	4	13.83	0.8125	4	16.9
CN37_HUMAN	2',3'-cyclic-nucleotide 3'-phosphodiesterase	47.5	9.8	70.7	2	3.8	10.92	0.675325	2	22.96	0.508065	2	47.29	0.681818	2	22.54
CNDP1_HUMAN	Beta-Ala-His dipeptidase	56.7	5.0	841.5	15	35.9	11.52	4.42857	67	60.02	2.14516	67	95.34	0.517045	69	50.89
CNDP2_HUMAN	Cytosolic non-specific dipeptidase	52.8	5.6	184	4	14.3	8.61	0.727273	8	20.78	0.491935	8	40.13	0.619318	8	42.6
CNO6L_HUMAN	CCR4-NOT transcription complex subunit 6-like	63.0	6.3	56	2	3.1	45.31	1.36364	3	105.92	0.25	3	87.18	0.164773	3	46.98
CNTFR_HUMAN	Ciliary neurotrophic factor receptor subunit alpha	40.6	6.3	397	8	21.8	19.60	0.506494	21	63.7	0.645161	24	36.79	1.11364	21	46.45
CNTN1_HUMAN	Contactin-1	113.2	5.5	422.9	9	11.3	11.38	0.493506	23	26.93	0.58871	23	21.95	1.07955	24	26.37
CO056_HUMAN	Putative uncharacterized protein C15orf56	17.0	12.8	86.2	2	8.7	23.93	2.24675	3	20.6	1.12097	3	14.21	0.454545	3	22.56
CO1A1_HUMAN	Collagen alpha-1(I) chain	138.9	5.5	98.9	2	1.0	17.43	2.06494	17	35.16	1.3871	17	45.36	0.613636	17	26.04
CO1A2_HUMAN	Collagen alpha-2(I) chain	129.2	9.7	145.8	3	2.9	14.53	1.1039	4	22.14	0.725806	4	40.36	0.602273	4	20.73
CO2_HUMAN	Complement C2	83.2	7.9	655.8	13	19.1	17.80	1.16883	42	36.79	1.49194	42	44.61	1.15909	43	38.84
CO3_HUMAN	Complement C3	187.0	6.0	8258.3	152	71.3	11.15	1.28571	736	40.03	2.02419	741	54.97	1.43182	771	52.57
CO3A1_HUMAN	Collagen alpha-1(III) chain	138.5	6.2	82.5	1	0.8	12.68	1.06494	4	7.23	0.370968	4	16.24	0.318182	4	12.15
CO4A_HUMAN	Complement C4-A	192.7	6.7	4307.5	75	44.1	11.76	1.1039	430	36.93	1.69355	443	59.24	1.42045	440	48.51
CO4B_HUMAN	Complement C4-B	192.6	7.0	4493.7	77	46.3	11.82	1.12987	424	36.74	1.70161	437	59.92	1.39205	436	51.06
CO5_HUMAN	Complement C5	188.2	6.1	502.9	11	9.5	11.70	1.76623	32	59.68	2.62097	33	68.67	1.39205	36	64.05
CO6_HUMAN	Complement component C6	104.7	6.4	110.2	2	2.1	11.44	1.02597	4	23.32	2.6129	4	17.25	2.32955	4	35.82
CO6A1_HUMAN	Collagen alpha-1(VI) chain	108.5	5.1	1581	27	26.7	11.78	0.350649	179	65.23	0.491935	180	31.48	1.30114	175	42.97
CO6A3_HUMAN	Collagen alpha-3(VI) chain	343.5	6.3	1077.6	19	9.0	12.30	1	70	53.63	1.23387	72	59.72	1.08523	69	58.45
CO7_HUMAN	Complement component C7	93.5	6.1	448.9	9	13.0	7.47	1.2987	23	36.87	1.6371	24	57.62	1.09091	24	35.51
CO8A_HUMAN	Complement component C8 alpha chain	65.1	6.1	175.1	4	7.2	12.09	1.4026	8	26.73	1.5	8	36.43	0.982955	8	46.15
CO8G_HUMAN	Complement component C8 gamma chain	22.3	9.4	183	3	25.7	13.16	0.935065	12	82.85	1.12903	12	111.2	1.10795	12	21.92
CO9_HUMAN	Complement component C9	63.1	5.3	780.7	14	26.7	12.16	1.63636	56	30.4	1.55645	57	40.85	0.869318	57	29.39
COASY_HUMAN	Bifunctional coenzyme A synthase	62.3	6.5	64.1	1	2.8	7.67	1.1039	3	25.25	1.51613	3	34.52	1.25568	3	21.51
COCA1_HUMAN	Collagen alpha-1(XII) chain	332.9	5.3	201.4	4	1.4	12.44	0.792208	14	41.3	1.07258	14	24.3	1.23864	14	49.63
COCH_HUMAN	Cochlin	59.4	9.1	192.6	4	6.0	201.99	1.2987	16	37.85	1.46774	16	37.76	1.03409	16	18.07
COE2_HUMAN	Transcription factor COE2	62.6	9.9	29.9	1	1.4	53.37	2.15584	2	3.43	1.59677	2	3.25	0.676136	2	0.17
COEA1_HUMAN	Collagen alpha-1(XIV) chain	193.4	5.0	67.2	2	1.3	340.61	0.727273	2	51.84	2.16129	2	89.49	2.73864	2	195.68
COF1_HUMAN	Cofilin-1	18.5	9.1	484.1	9	56.0	10.56	0.922078	19	51.78	0.991935	21	43.03	0.931818	21	37.82
COFA1_HUMAN	Collagen alpha-1(XV) chain	141.6	4.8	751.3	14	11.5	22.27	0.480519	74	70.84	0.685484	87	46.93	1.38636	74	55.08
COIA1_HUMAN	Collagen alpha-1(XVIII) chain	178.1	5.6	269.6	6	7.0	14.43	0.376623	15	116.04	0.435484	18	53.53	0.897727	14	57.35
COL12_HUMAN	Collectin-12	81.5	5.4	249.8	5	6.6	7.63	1.58442	32	26.68	2.58871	32	51.15	1.49432	32	31.39
COMP_HUMAN	Cartilage oligomeric matrix protein	82.8	4.2	102.8	2	2.5	11.21	0.441558	7	24.86	0.395161	7	16.17	0.8125	7	11.19
COPB_HUMAN	Coatomer subunit beta	107.1	5.7	113	3	3.1	438.81	0.506494	7	251.44	0.733871	7	57.39	1.3125	7	109.2
COPE_HUMAN	Coatomer subunit epsilon	34.5	4.8	28.4	1	1.9	854.82	4.02597	5	36.48	0.564516	5	40.14	0.125	5	20.77
COR1A_HUMAN	Coronin-1A	51.0	6.3	84.4	1	3.5	11.57	6.11688	4	25.66	3.70968	4	18.05	0.556818	4	7.62
COTL1_HUMAN	Coactosin-like protein	15.9	5.4	425.1	9	44.4	15.91	1.48052	61	33.79	1.79032	63	53.43	1.11364	64	36.42
CP089_HUMAN	UPF0764 protein C16orf89	45.4	5.8	169.2	3	9.0	13.54	0.324675	11	40.81	0.508065	11	17.95	1.44886	11	44.11
CP096_HUMAN	Putative uncharacterized protein C16orf96	125.0	6.6	25.2	1	0.9	716.37	1.94805	3	15.63	3.33871	3	10.77	1.56818	3	18.45
CP4X1_HUMAN	Cytochrome P450 4X1	58.8	9.5	58.7	2	2.6	841.90	2.64935	7	72.29	1.14516	7	117.4	0.392045	7	32.08
CPLX1_HUMAN	Complexin-1	15.0	4.8	27.3	1	4.5	5.49	3.96104	13	10.5	1.69355	13	7.46	0.397727	12	5.5
CPN2_HUMAN	Carboxypeptidase N subunit 2	60.5	5.6	729.2	13	27.7	10.65	2.23377	73	53.93	2.15323	75	71.5	0.943182	84	41.45
CPNE1_HUMAN	Copine-1	59.0	5.4	54.5	2	2.2	1028.22	0.597403	4	85.31	0.983871	4	100.19	1.51136	4	27.39
CPNE3_HUMAN	Copine-3	60.1	5.5	194.4	4	7.8	8.60	0.818182	9	17.59	0.685484	9	18.34	0.761364	9	16.18
CPNS1_HUMAN	Calpain small subunit 1	28.3	4.9	82.8	2	13.8	13.97	1.4026	5	55.13	0.991935	5	55.57	0.653409	5	49.06
CPPED_HUMAN	Calcineurin-like phosphoesterase domain-containing protein 1	35.5	5.8	98.7	3	11.1	6.97	1.02597	5	23.36	0.854839	5	31.47	0.767045	5	27.19
CPVL_HUMAN	Probable serine carboxypeptidase CPVL	54.1	5.3	351.8	9	18.9	12.62	0.558442	36	49.07	0.870968	36	54.04	1.40909	36	30.05
CQ047_HUMAN	Uncharacterized protein C17orf47	63.1	9.9	44.6	1	2.1	8.58	1.24675	4	16.04	1.04839	4	20.48	0.761364	4	5.75
CQ085_HUMAN	Uncharacterized protein C17orf85	70.5	5.4	25.5	1	1.1	65.86	0.558442	2	4.81	0.637097	2	3.76	1.02841	2	1.04
CR1_HUMAN	Complement receptor type 1	223.5	6.6	134.2	2	1.2	12.70	0.298701	5	15.48	0.443548	5	14.32	1.34091	5	3.47
CRAC1_HUMAN	Cartilage acidic protein 1	71.4	4.8	82	2	2.7	8.74	1.12987	4	24.64	1.08871	4	3.58	0.880682	4	21.52
CRHBP_HUMAN	Corticotropin-releasing factor-binding protein	36.1	6.1	91.9	2	8.1	221.34	1.28571	5	53.86	3.08871	5	64.37	2.19886	5	12.22
CRIS1_HUMAN	Cysteine-rich secretory protein 1	28.5	5.5	207	3	16.9	11.00	1.15584	12	75.06	1.33065	12	64.6	1.04545	12	35.3
CRNN_HUMAN	Cornulin	53.5	5.7	576.4	8	29.3	14.31	0.246753	71	59	0.153226	66	62.54	0.5625	64	42.82
CRP_HUMAN	C-reactive protein	25.0	5.3	252.4	5	19.2	9.52	0.857143	19	49.51	3.82258	19	57.38	4.05114	19	54
CRYAB_HUMAN	Alpha-crystallin B chain	20.1	6.9	87.4	2	10.9	17.11	0.532468	3	21.32	1.04839	3	34.84	1.79545	3	50.39
CRYL1_HUMAN	Lambda-crystallin homolog	35.4	5.8	129.5	3	10.7	11.93	0.675325	7	19.21	0.798387	7	20.4	1.09659	7	17.77
CRYM_HUMAN	Thiomorpholine-carboxylate dehydrogenase	33.8	4.9	104.9	2	15.9	10.51	0.805195	2	33.67	0.629032	2	35.23	0.710227	2	1.44
CS010_HUMAN	UPF0556 protein C19orf10	18.8	6.2	384.8	8	30.6	10.57	1.64935	26	22.94	2.57258	26	34.08	1.41477	27	26.07
CS066_HUMAN	UPF0515 protein C19orf66	33.1	7.1	29	1	3.1	68.36	3.84416	2	6.7	2.53226	2	1.02	0.602273	2	5.68
CS077_HUMAN	Transmembrane protein C19orf77	15.0	5.1	48.7	1	7.7	8.45	0.207792	4	11.95	0.516129	4	3	2.21591	4	13.89
CSF1_HUMAN	Macrophage colony-stimulating factor 1	60.1	5.0	497.6	9	10.6	9.07	0.766234	35	73.91	1.04839	35	40.51	1.24432	35	51.66
CSF1R_HUMAN	Macrophage colony-stimulating factor 1 receptor	107.9	5.9	43.7	1	1.7	10.64	1.94805	2	16.09	1.17742	2	18.95	0.556818	2	2.79
CSPG4_HUMAN	Chondroitin sulfate proteoglycan 4	250.4	5.2	373.8	8	4.3	10.87	0.376623	21	49.39	0.604839	21	34.18	1.53977	20	32.5
CSPP1_HUMAN	Centrosome and spindle pole-associated protein 1	145.4	6.4	33.1	1	0.9	34.09	0.584416	2	24.6	0.572581	2	14	0.886364	2	10.34
CT062_HUMAN	Uncharacterized protein C20orf62	19.5	6.3	27.7	1	8.2	440.24	4.01299	7	39.25	1.07258	7	32.71	0.244318	7	22.29
CTL2_HUMAN	Choline transporter-like protein 2	80.1	9.8	65.7	2	2.4	316.44	0.519481	2	14.95	0.33871	2	10.83	0.596591	2	26.1
CTL4_HUMAN	Choline transporter-like protein 4	79.2	9.8	31.6	1	2.0	6.89	0.194805	3	3.51	0.282258	3	14.33	1.27841	3	17.44
CTR9_HUMAN	RNA polymerase-associated protein CTR9 homolog	133.4	6.3	28	1	1.3	31.71	0.571429	4	13.33	4.65323	4	7.11	7.44886	4	17.77
CUBN_HUMAN	Cubilin	398.5	5.0	2026	43	15.7	14.38	0.662338	162	54.69	0.774194	159	40.67	1.09091	159	38.88
CUTA_HUMAN	Protein CutA	19.1	5.3	273.3	5	40.8	10.90	0.883117	20	46.55	0.870968	20	39.39	0.977273	19	35.9
CYBP_HUMAN	Calcyclin-binding protein	26.2	9.0	110.8	2	11.4	12.05	1.83117	13	97.71	3.75806	13	159.09	1.88068	13	34.74
CYBR1_HUMAN	Cytochrome b reductase 1	31.6	9.5	58.9	1	4.2	14.25	0.818182	2	8.52	0.959677	2	0.23	1.06818	2	8.29
CYC_HUMAN	Cytochrome c	11.7	10.1	186.8	4	41.9	215.20	1.03896	13	62.61	1.55645	13	58	1.375	13	45.06
CYTB_HUMAN	Cystatin-B	11.1	7.9	397	9	74.5	14.07	0.428571	34	21.38	0.564516	33	27.71	1.16477	33	30.97
CYTC_HUMAN	Cystatin-C	15.8	9.9	518.6	9	42.5	13.83	1.03896	56	41.59	1.32258	57	66.57	1.1875	58	53.94
CYTM_HUMAN	Cystatin-M	16.5	9.5	364.5	5	27.5	7.25	1.53247	29	74.22	1.56452	30	87.23	1.10795	37	59.68
CYTM1_HUMAN	Cysteine-rich and transmembrane domain-containing protein 1	10.6	4.0	54.3	1	10.3	10.11	0.818182	3	19.12	0.830645	3	23.34	0.926136	3	7.44
CYTS_HUMAN	Cystatin-S	16.2	4.8	139	3	26.2	16.26	0.506494	12	35.04	0.653226	12	27.24	1.17614	12	15.78
DAG1_HUMAN	Dystroglycan	97.4	9.4	436.7	8	11.5	9.11	0.922078	25	26.53	1.24194	24	34.95	1.17614	25	35.7
DCUP_HUMAN	Uroporphyrinogen decarboxylase	40.8	5.7	66.5	1	6.0	13.99	1.61039	4	29.97	1.12097	4	31.55	0.636364	4	35.77
DCXR_HUMAN	L-xylulose reductase	25.9	9.7	219.8	4	23.0	12.08	0.38961	16	56.63	0.387097	16	52.64	0.903409	16	43.94
DDAH1_HUMAN	N(G),N(G)-dimethylarginine dimethylaminohydrolase 1	31.1	5.5	59.3	1	5.6	21.81	1.01299	2	0.48	1.24194	2	2.46	1.11932	2	1.98
DDAH2_HUMAN	N(G),N(G)-dimethylarginine dimethylaminohydrolase 2	29.6	5.6	103.5	2	9.1	15.40	0.987013	5	37.86	0.741935	5	79.76	0.693182	5	37.69
DDC_HUMAN	Aromatic-L-amino-acid decarboxylase	53.9	6.9	168.3	3	7.5	17.63	0.454545	10	73.99	0.629032	10	37.42	1.25568	10	45.66
DDR1_HUMAN	Epithelial discoidin domain-containing receptor 1	101.1	6.4	297.9	8	9.3	356.47	0.480519	15	54.41	0.637097	15	32.72	1.21591	15	37.48
DDR2_HUMAN	Discoidin domain-containing receptor 2	96.7	5.1	140.9	3	5.3	15.20	0.844156	8	28.61	1.23387	8	32.73	1.34091	8	39.23
DDX25_HUMAN	ATP-dependent RNA helicase DDX25	54.7	5.9	43.4	1	2.5	15.94	2.97403	8	34.56	1.27419	8	41.71	0.392045	8	18.55
DDX43_HUMAN	Probable ATP-dependent RNA helicase DDX43	72.8	9.6	90.6	3	2.6	14.00	2.63636	5	26.37	1.29839	5	10.72	0.448864	5	17.77
DDX60_HUMAN	Probable ATP-dependent RNA helicase DDX60	197.7	8.2	61	2	1.3	592.87	2.77922	2	67.25	2.01613	2	53.24	0.664773	2	11.17
DEF5_HUMAN	Defensin-5	10.1	10.0	111.4	2	36.2	13.79	1.74026	5	50.97	1.23387	5	71.2	0.653409	5	81.4
DEF6_HUMAN	Defensin-6	11.0	5.1	107.1	2	30.0	8.31	0.857143	6	94.43	1.25	6	88.86	1.32386	6	9.87
DERM_HUMAN	Dermatopontin	24.0	4.5	211.8	4	20.4	9.67	0.883117	28	30.78	1.46774	29	50.21	1.47159	29	54.82
DESP_HUMAN	Desmoplakin	331.6	6.4	133.7	4	0.9	10.54	1.45455	9	108.79	0.766129	9	54.79	0.482955	9	146.63
DEST_HUMAN	Destrin	18.5	9.2	93.4	2	14.5	429.02	0.675325	5	82.2	0.653226	5	13.67	0.880682	5	65.27
DGKD_HUMAN	Diacylglycerol kinase delta	134.4	8.7	26.9	1	0.5	19.89	2.77922	3	28.43	3.78226	3	32.05	1.24432	3	15.3
DHAK_HUMAN	Bifunctional ATP-dependent dihydroxyacetone kinase/FAD-AMP lyase (cyclizing)	58.9	7.9	290.4	5	15.0	13.85	0.792208	12	36.02	0.741935	12	54.72	0.852273	12	36.96
DHSO_HUMAN	Sorbitol dehydrogenase	38.3	9.3	185.5	4	14.8	13.17	0.532468	9	28.29	0.459677	9	33.63	0.789773	9	28.75
DHX15_HUMAN	Putative pre-mRNA-splicing factor ATP-dependent RNA helicase DHX15	90.9	7.4	28.6	1	1.5	33.87	0.519481	4	26.64	1.18548	4	61.29	2.06818	4	36.34
DHX9_HUMAN	ATP-dependent RNA helicase A	140.9	6.4	55.5	1	0.7	8.40	2.28571	9	49.13	2.3629	9	67.23	0.948864	9	34.38
DIAC_HUMAN	Di-N-acetylchitobiase	43.7	6.2	708.9	12	30.6	13.43	0.74026	99	34.47	0.822581	96	29.34	0.960227	97	38.82
DIAP3_HUMAN	Protein diaphanous homolog 3	136.8	6.7	76.8	2	1.3	687.68	0.87013	2	110.33	0.919355	2	57.15	0.960227	2	37.28
DIRA2_HUMAN	GTP-binding protein Di-Ras2	22.5	9.8	59.6	1	5.5	19.39	1.87013	3	22.88	2.46774	3	12.09	1.21023	3	11.99
DIXC1_HUMAN	Dixin	77.4	5.8	29.2	1	1.0	22.55	0.935065	2	2.85	0.322581	2	8.36	0.318182	2	11.23
DJB14_HUMAN	DnaJ homolog subfamily B member 14	42.5	9.5	60.8	1	2.4	51.25	0.935065	2	9.43	6.41129	2	11.94	6.27841	2	2.49
DJC14_HUMAN	DnaJ homolog subfamily C member 14	78.5	9.4	79.2	3	2.4	513.86	1.74026	3	311.17	1.70161	3	177.41	0.897727	3	152.18
DKK3_HUMAN	Dickkopf-related protein 3	38.4	4.4	118.2	2	7.7	10.29	1.24675	6	19.55	2.12097	6	28.32	1.55682	6	9.8
DLDH_HUMAN	Dihydrolipoyl dehydrogenase, mitochondrial	54.1	8.9	180.8	3	3.7	285.76	0.558442	5	16.17	0.419355	5	20.95	0.6875	5	25.4
DLGP5_HUMAN	Disks large-associated protein 5	95.1	9.8	57.4	2	1.2	26.56	1.12987	3	12.77	0.790323	3	13.15	0.647727	3	2.03
DMBT1_HUMAN	Deleted in malignant brain tumors 1 protein	260.6	5.1	269.4	5	2.1	7.84	1.02597	15	42.1	1.58065	15	50.51	1.51705	14	24.62
DNAS1_HUMAN	Deoxyribonuclease-1	31.4	4.6	621.2	14	33.7	9.16	0.311688	68	73.3	0.395161	66	32.54	1.23295	67	46.36
DNS2A_HUMAN	Deoxyribonuclease-2-alpha	39.6	9.2	27.6	1	1.9	12.68	0.558442	4	5.4	0.895161	4	4.64	1.46023	4	3.67
DNSL1_HUMAN	Deoxyribonuclease-1-like 1	33.9	5.4	111.6	2	15.2	233.08	0.727273	3	42.49	0.467742	4	19.44	0.619318	3	28.98
DOP2_HUMAN	Protein dopey-2	258.1	5.9	104.7	3	1.2	8.17	0.402597	5	262.69	0.596774	6	408.16	1.90341	5	56.45
DOPD_HUMAN	D-dopachrome decarboxylase	12.7	7.8	154.6	3	26.3	9.56	0.623377	16	13.36	0.927419	17	21.34	1.33523	16	17.18
DPEP1_HUMAN	Dipeptidase 1	45.6	5.7	764.1	14	34.8	11.46	0.285714	62	68.83	0.379032	66	48.91	1.07386	62	48.98
DPP2_HUMAN	Dipeptidyl peptidase 2	54.3	5.9	473.4	10	28.9	11.47	1.03896	26	33.9	1.1129	27	34.58	0.988636	26	41.67
DPP3_HUMAN	Dipeptidyl peptidase 3	82.5	4.9	174.3	3	8.7	48.62	0.571429	6	49.78	0.66129	6	30.96	1.0625	6	41.94
DPP4_HUMAN	Dipeptidyl peptidase 4	88.2	5.6	1580.4	30	35.2	15.50	0.584416	156	35.01	0.677419	163	44.15	1.13636	157	29.74
DPYD_HUMAN	Dihydropyrimidine dehydrogenase [NADP(+)]	111.3	7.0	63.8	2	1.7	377.51	3.80519	4	45.87	2.3629	4	75.09	0.568182	4	23.97
DQA2_HUMAN	HLA class II histocompatibility antigen, DQ alpha 2 chain	28.0	4.6	38.3	1	4.7	4.85	0.155844	4	26.73	0.193548	4	29.17	1.10795	4	23.98
DSC1_HUMAN	Desmocollin-1	99.9	5.1	48	1	1.5	12.69	0.662338	3	0.88	0.516129	3	8.39	0.704545	3	8.85
DSC2_HUMAN	Desmocollin-2	99.9	5.1	749.7	13	16.6	12.48	0.714286	85	63.36	0.862903	85	57.86	1.10227	84	35.24
DSC3_HUMAN	Desmocollin-3	99.9	5.7	26.6	1	1.0	9.63	0.792208	2	16.1	0.637097	2	9.79	0.738636	2	6.24
DSG1_HUMAN	Desmoglein-1	113.7	4.8	192.1	4	7.3	9.93	0.675325	9	75.28	0.774194	9	62.37	1.04545	9	19.24
DSG2_HUMAN	Desmoglein-2	122.2	5.0	475.7	9	8.8	9.50	1.18182	30	15.94	1.21774	32	27.59	0.909091	32	35.31
DYH12_HUMAN	Dynein heavy chain 12, axonemal	356.7	5.8	52.1	2	0.5	48.17	0.87013	2	62.69	1	2	746.19	1.04545	2	260.93
DYH17_HUMAN	Dynein heavy chain 17, axonemal	511.5	5.5	107.7	2	0.4	26.07	2.1039	3	78.73	1.62097	3	60.69	0.704545	3	13.65
DYH6_HUMAN	Dynein heavy chain 6, axonemal	475.7	5.6	136.7	4	0.6	10.20	1.25974	10	120.75	1.44355	10	42.33	1.05114	10	63
DYH7_HUMAN	Dynein heavy chain 7, axonemal	460.9	5.6	52.5	2	0.6	554.02	1.22078	2	64.74	0.927419	2	26.43	0.698864	2	34.11
DYH8_HUMAN	Dynein heavy chain 8, axonemal	514.3	5.9	140.6	2	0.5	48.15	1	2	25.12	5.02419	2	180.71	4.625	2	122.45
DYH9_HUMAN	Dynein heavy chain 9, axonemal	511.6	5.6	80.4	3	0.7	748.45	2.49351	4	854.99	0.854839	4	606.06	0.3125	4	63.25
DYHC1_HUMAN	Cytoplasmic dynein 1 heavy chain 1	532.1	6.0	123.3	2	0.7	7.53	0.467532	3	36.42	0.556452	5	41.4	1.36364	3	44.34
DYHC2_HUMAN	Cytoplasmic dynein 2 heavy chain 1	492.3	6.1	80.1	2	0.3	1085.24	0.909091	2	69.68	0.564516	2	20.66	0.573864	2	44.46
DYR1A_HUMAN	Dual specificity tyrosine-phosphorylation-regulated kinase 1A	85.5	9.5	51	2	1.8	21.35	0.961039	2	30.23	4.66129	2	34.12	4.4375	2	3.61
DYST_HUMAN	Dystonin	860.1	5.0	68	2	0.3	526.92	1.35065	4	45.13	0.75	4	44.43	0.505682	4	26.21
E2AK2_HUMAN	Interferon-induced, double-stranded RNA-activated protein kinase	62.1	9.3	25.6	1	2.4	58.74	0.142857	3	2.47	0.193548	3	7.94	1.1875	3	6.94
E2F7_HUMAN	Transcription factor E2F7	99.8	9.0	58	2	1.6	20.93	0.896104	3	92.97	3.29839	3	33.51	3.36364	3	117.14
ECH1_HUMAN	Delta(3,5)-Delta(2,4)-dienoyl-CoA isomerase, mitochondrial	35.8	9.2	69.3	1	6.7	15.09	0.974026	9	24.72	0.943548	9	19.16	0.892045	9	26.38
ECHD1_HUMAN	Ethylmalonyl-CoA decarboxylase	33.7	9.2	48.4	1	3.3	4.52	1.63636	4	21.86	20.7581	4	32.79	11.642	4	55.35
ECM1_HUMAN	Extracellular matrix protein 1	60.6	6.3	178.3	4	8.7	11.82	1.35065	13	46.67	1.91129	12	24.23	1.19318	13	31.69
EF1A1_HUMAN	Elongation factor 1-alpha 1	50.1	9.7	567.1	11	27.7	17.05	0.324675	33	31.41	0.508065	34	20.68	1.38636	34	37.47
EF1G_HUMAN	Elongation factor 1-gamma	50.1	6.3	225.2	4	17.6	11.06	0.896104	7	15.6	0.846774	7	12.93	0.875	7	17.23
EF2_HUMAN	Elongation factor 2	95.3	6.4	376.8	7	10.5	13.21	0.662338	19	42.99	0.790323	20	34.99	1.08523	19	51.99
EFC14_HUMAN	EF-hand calcium-binding domain-containing protein 14	55.0	5.9	45.6	1	4.2	11.56	1.12987	3	18.98	1.58065	3	4.28	1.28409	3	16.02
EFCB3_HUMAN	EF-hand calcium-binding domain-containing protein 3	50.1	10.0	27.8	1	2.5	827.42	2.18182	4	3.75	5.12097	4	11.85	2.14205	4	13.77
EFHD2_HUMAN	EF-hand domain-containing protein D2	26.7	5.0	88	1	5.0	10.23	1.76623	2	10.13	1.77419	2	4.14	0.920455	2	5.97
EFNA1_HUMAN	Ephrin-A1	23.8	6.4	52.8	1	3.9	12.40	0.38961	4	6.04	0.604839	4	2.56	1.39773	4	3.75
EFNB1_HUMAN	Ephrin-B1	38.0	9.8	224.4	5	14.5	10.12	1.03896	14	37.99	1.73387	13	18.72	1.4375	14	24.39
EFR3B_HUMAN	Protein EFR3 homolog B	92.4	6.3	26.6	1	0.9	63.90	0.922078	3	53.71	2.87097	3	18.38	2.84091	3	70.3
EGF_HUMAN	Pro-epidermal growth factor	133.9	5.5	1253.7	26	21.0	11.47	0.415584	130	52.95	0.66129	133	27.47	1.44886	130	57.81
EGFL6_HUMAN	Epidermal growth factor-like protein 6	61.3	9.7	28.8	1	1.1	1035.98	1.06494	2	2.71	3.35484	2	27.17	2.89773	2	24.33
EHBP1_HUMAN	EH domain-binding protein 1	139.9	5.1	103.7	2	1.2	10.01	0.220779	7	44.79	0.604839	7	30.65	2.46591	7	15.41
EHD1_HUMAN	EH domain-containing protein 1	60.6	6.4	253.9	5	9.9	12.74	0.441558	12	41.57	0.701613	13	35.32	1.21591	13	64.04
EIF3A_HUMAN	Eukaryotic translation initiation factor 3 subunit A	166.5	6.4	51	1	0.4	30.14	0.480519	2	5.96	0.612903	2	4.73	1.16477	2	10.72
ELNE_HUMAN	Neutrophil elastase	28.5	12.2	45.8	1	3.7	6.01	3.19481	7	29.46	2.62903	7	31.65	0.755682	7	9.93
EMAL6_HUMAN	Echinoderm microtubule-associated protein-like 6	217.8	7.3	27.2	1	0.6	724.27	4.81818	2	8.1	1.62097	2	9.77	0.306818	2	1.67
ENDD1_HUMAN	Endonuclease domain-containing 1 protein	55.0	5.4	724.3	13	34.6	11.63	0.753247	60	52.35	1.03226	61	43.12	1.32955	62	34.29
ENOA_HUMAN	Alpha-enolase	47.1	7.7	1110	18	52.1	48.11	0.74026	106	62.15	0.733871	111	42.42	0.954545	104	47.34
ENOG_HUMAN	Gamma-enolase	47.2	4.8	235.8	3	6.9	7.15	0.584416	8	10.16	1.12903	9	57.2	1.41477	9	30.13
ENOPH_HUMAN	Enolase-phosphatase E1	28.9	4.5	87.3	2	13.0	15.64	1.09091	3	0.31	1.19355	3	8.46	1.00568	3	8.48
ENPL_HUMAN	Endoplasmin	92.4	4.6	636.9	11	13.4	13.92	0.922078	30	46.82	1.51613	31	47.82	1.53409	30	55.6
ENPP3_HUMAN	Ectonucleotide pyrophosphatase/phosphodiesterase family member 3	100.1	6.1	114.2	2	3.4	325.73	0.831169	5	31.6	0.653226	5	15.65	0.721591	5	24.49
ENPP4_HUMAN	Bis(5'-adenosyl)-triphosphatase ENPP4	51.6	5.7	92	2	4.9	5.45	0.883117	6	14.65	0.975806	6	7.9	1.01136	6	12.37
ENPP6_HUMAN	Ectonucleotide pyrophosphatase/phosphodiesterase family member 6	50.2	8.9	93	2	6.6	6.94	1	5	61.58	1.23387	5	23.68	1.13068	5	36.92
EP3B_HUMAN	Epididymal secretory protein E3-beta	17.6	6.6	109.6	3	18.4	14.23	1.44156	8	25.28	1.08065	8	48.2	0.6875	8	26.47
EPAS1_HUMAN	Endothelial PAS domain-containing protein 1	96.4	5.8	26.3	1	0.9	21.43	0.896104	2	15.73	1.14516	2	21.09	1.17045	2	5.23
EPCR_HUMAN	Endothelial protein C receptor	26.7	6.9	426.5	7	20.6	5.37	0.402597	55	84.12	0.532258	58	39.36	1.32386	55	42.46
EPHA4_HUMAN	Ephrin type-A receptor 4	109.8	6.2	122.6	3	5.3	7.77	1.32468	6	18.66	1.1371	6	21.35	0.789773	6	18.38
EPHA7_HUMAN	Ephrin type-A receptor 7	112.0	5.5	176.1	3	5.1	6.81	0.584416	6	9.26	0.741935	6	8.01	1.16477	6	13.34
EPHB2_HUMAN	Ephrin type-B receptor 2	117.4	6.1	58.4	1	1.7	12.11	0.753247	3	10.25	0.870968	3	3.46	1.0625	3	8.33
EPHB4_HUMAN	Ephrin type-B receptor 4	108.2	6.5	198.3	5	6.4	13.34	0.714286	17	33.68	1.15323	18	21.21	1.48864	17	23.32
EPIPL_HUMAN	Epiplakin	555.3	5.3	293.3	5	1.7	19.64	1.4026	8	58.33	1.24194	9	64.37	0.875	8	31.62
ERAP1_HUMAN	Endoplasmic reticulum aminopeptidase 1	107.2	6.0	130	3	5.3	12.87	1.72727	5	76.52	1.72581	5	10.16	0.9375	6	73.7
ERCC1_HUMAN	DNA excision repair protein ERCC-1	32.5	5.9	30.9	1	2.0	22.76	0.025974	2	28.48	0.177419	2	0.24	6.39205	2	28.74
ERD22_HUMAN	ER lumen protein retaining receptor 2	24.4	9.4	43.8	1	4.7	6.26	0.103896	3	62.75	0.354839	4	17.1	3.14205	3	89.16
ERP44_HUMAN	Endoplasmic reticulum resident protein 44	46.9	5.0	140.6	4	8.1	9.40	1.18182	8	15.92	1.73387	8	11.09	1.34091	8	22.76
ESAM_HUMAN	Endothelial cell-selective adhesion molecule	41.2	10.2	70.3	1	4.4	284.62	1.28571	9	26.29	1.12903	9	35.56	0.801136	9	39.8
EST2_HUMAN	Cocaine esterase	61.8	5.7	280.4	7	20.0	12.36	1.28571	12	40.34	1.12097	12	46.62	0.795455	12	25.88
EST5A_HUMAN	Carboxylesterase 5A	63.9	6.0	61.4	1	2.3	16.82	1.35065	3	51.9	0.548387	4	136.64	0.5625	3	57.45
ETFD_HUMAN	Electron transfer flavoprotein-ubiquinone oxidoreductase, mitochondrial	68.5	7.9	32	1	1.3	736.46	4.1039	3	9	2.62903	3	7.96	0.585227	3	3.69
EZRI_HUMAN	Ezrin	69.4	5.9	1299	27	39.2	9.74	0.519481	116	31.76	0.653226	115	27.04	1.17614	115	41.29
F10A1_HUMAN	Hsc70-interacting protein	41.3	5.0	96.8	1	2.7	6.37	0.480519	2	1.17	0.798387	2	2.96	1.52273	2	4.13
F13B_HUMAN	Coagulation factor XIII B chain	75.5	6.0	116.9	2	5.4	18.63	1.05195	4	26.11	1.26613	4	59.8	1.10227	4	43.2
F151A_HUMAN	Protein FAM151A	64.0	6.2	321.6	7	17.4	10.92	0.792208	14	48.98	0.701613	17	34.88	0.767045	14	26.46
F16P1_HUMAN	Fructose-1,6-bisphosphatase 1	36.8	6.7	479.3	8	29.6	9.81	0.597403	34	40.88	0.774194	32	22.6	1.11364	34	42.75
F186A_HUMAN	Protein FAM186A	262.6	9.2	59.6	2	1.0	240.42	1.18182	5	151.26	0.370968	5	235.48	0.289773	5	30.86
F194B_HUMAN	Protein FAM194B	81.6	4.6	31.1	1	2.2	298.29	3.4026	2	6.64	0.475806	2	73.94	0.125	2	65.06
F208B_HUMAN	Protein FAM208B	268.7	5.5	83.3	2	0.5	1045.07	0.831169	2	527.75	0.604839	2	165.98	0.664773	2	77.15
FA12_HUMAN	Coagulation factor XII	67.7	9.4	220	5	7.2	17.91	0.857143	21	35.24	1.72581	21	68.99	1.82955	21	82.32
FA46C_HUMAN	Protein FAM46C	44.9	5.4	84.7	2	4.1	33.32	0.883117	5	19.05	0.419355	5	29.68	0.4375	5	39.47
FA49B_HUMAN	Protein FAM49B	36.7	5.7	140	3	12.7	14.92	1.33766	8	38.54	1.75806	8	58.38	1.19886	8	41.62
FA5_HUMAN	Coagulation factor V	251.5	5.6	42	1	0.6	42.49	4.63636	5	74.89	2	5	44.1	0.380682	6	30.31
FA63B_HUMAN	Protein FAM63B	67.1	4.3	183.6	5	3.7	226.11	1.1039	19	34.45	0.362903	20	48.56	0.323864	20	55.04
FA9_HUMAN	Coagulation factor IX	51.7	5.2	82.6	2	6.3	10.78	1.53247	3	31.86	1.3629	3	8.6	0.8125	3	41.25
FAAA_HUMAN	Fumarylacetoacetase	46.3	6.5	221.2	4	15.3	11.53	0.688312	15	32.2	0.677419	15	45.76	0.903409	15	48.99
FABP4_HUMAN	Fatty acid-binding protein, adipocyte	14.7	7.5	138.2	3	36.4	17.69	1.8961	6	124.64	2.5	6	88.4	1.21023	6	40.27
FABP5_HUMAN	Fatty acid-binding protein, epidermal	15.2	7.5	154	4	16.3	7.75	0.38961	16	20.79	0.266129	16	83.87	0.619318	16	71.78
FABP6_HUMAN	Gastrotropin	14.4	6.4	518.8	10	84.4	12.14	1.46753	30	49.82	2.03226	32	69.12	1.3125	30	46.72
FABPH_HUMAN	Fatty acid-binding protein, heart	14.8	6.4	303.7	7	45.9	8.64	1.02597	18	34.42	1.49194	18	41.23	1.32955	18	16.66
FABPI_HUMAN	Fatty acid-binding protein, intestinal	15.2	7.5	59.8	1	8.3	10.60	3.88312	3	14.85	3.6129	3	15.09	0.852273	3	0.3
FABPL_HUMAN	Fatty acid-binding protein, liver	14.2	7.5	398.1	7	59.1	255.66	2.19481	27	28.77	1.50806	27	25.16	0.619318	33	30.46
FACR2_HUMAN	Fatty acyl-CoA reductase 2	59.4	10.0	53.2	2	3.5	16.21	1.20779	3	14.92	1.33065	3	20.89	1	3	36.65
FAM3B_HUMAN	Protein FAM3B	26.0	9.7	88.5	2	8.1	10.62	0.688312	7	26.17	0.75	7	25.85	0.982955	7	7.7
FAM3C_HUMAN	Protein FAM3C	24.7	9.4	721.7	12	45.8	14.65	1.68831	77	47.56	1.98387	79	66.41	1.09659	78	63.86
FAS_HUMAN	Fatty acid synthase	273.3	6.0	351	6	4.5	114.80	0.324675	14	69.63	0.419355	19	32.96	1.05682	16	59.62
FAT4_HUMAN	Protocadherin Fat 4	542.4	4.6	102.6	2	0.8	29.38	0.857143	3	13.08	0.919355	3	42.91	0.982955	3	45.35
FBF1_HUMAN	Fas-binding factor 1	125.4	6.6	110.8	3	1.6	43.60	1.63636	9	34.36	2.90323	9	73.51	1.61932	9	44.98
FBLN1_HUMAN	Fibulin-1	77.2	4.9	274.7	6	12.4	11.77	1.41558	17	44.1	2.27419	20	56.41	1.59091	17	80.45
FBLN2_HUMAN	Fibulin-2	126.5	4.6	32	1	1.1	7.58	1.36364	2	8.93	1.03226	2	3.41	0.693182	2	12.36
FBLN3_HUMAN	EGF-containing fibulin-like extracellular matrix protein 1	54.6	4.8	610.3	10	18.3	14.23	1.46753	67	47.4	1.87097	77	56.62	1.09091	81	51.75
FBLN5_HUMAN	Fibulin-5	50.1	4.4	82	2	5.6	12.29	0.649351	6	22.13	0.935484	6	46.59	1.31818	6	23.93
FBN1_HUMAN	Fibrillin-1	312.0	4.7	59.2	2	0.6	12.21	0.857143	3	7.96	1	3	4.67	1.06818	3	11.49
FBN2_HUMAN	Fibrillin-2	314.6	4.6	25.2	1	0.3	20.15	1.4026	2	0.54	0.951613	2	0.51	0.625	2	1.05
FBX50_HUMAN	F-box only protein 50	30.8	6.2	40.2	1	4.0	5.98	0.753247	2	9.08	0.451613	2	13.65	0.545455	2	4.53
FCG3A_HUMAN	Low affinity immunoglobulin gamma Fc region receptor III-A	29.1	9.1	168.4	5	14.6	12.02	0.402597	14	33.04	0.556452	15	27.02	1.44886	15	49.08
FCG3B_HUMAN	Low affinity immunoglobulin gamma Fc region receptor III-B	26.2	6.3	160.2	4	15.0	11.90	0.623377	9	45.05	0.733871	9	20.26	1.09091	9	52.3
FCGBP_HUMAN	IgGFc-binding protein	571.6	5.0	2031.3	34	7.8	13.47	0.74026	192	42.3	0.806452	197	38.76	0.977273	193	45.47
FCL_HUMAN	GDP-L-fucose synthase	35.9	6.1	56	1	3.4	9.99	0.493506	4	28.17	0.854839	4	21.62	1.57386	4	10.78
FCN2_HUMAN	Ficolin-2	34.0	6.4	249.7	5	20.1	10.89	0.636364	19	40.97	1.75	19	32.69	2.51136	19	51.57
FCN3_HUMAN	Ficolin-3	32.9	6.2	148.6	3	11.0	13.13	1.50649	8	30.98	2.45968	8	33.27	1.48864	8	29.88
FES_HUMAN	Tyrosine-protein kinase Fes/Fps	93.4	6.3	26.7	1	1.0	987.71	2.06494	11	40.28	2.47581	11	43.36	1.09659	11	11.88
FETUA_HUMAN	Alpha-2-HS-glycoprotein	39.3	5.4	1218.1	20	41.1	13.25	1.71429	159	54.88	1.65323	158	85.16	0.994318	181	47.99
FETUB_HUMAN	Fetuin-B	42.0	6.6	259.7	6	13.9	7.57	1.71429	18	35.04	1.37097	18	61.11	0.664773	23	49.45
FFAR2_HUMAN	Free fatty acid receptor 2	37.1	10.3	32.3	1	1.8	4.52	5.44156	2	1.47	5.16129	2	0.83	0.869318	2	2.3
FGFR2_HUMAN	Fibroblast growth factor receptor 2	92.0	5.5	71.5	2	2.4	532.29	0.714286	4	77.41	0.870968	4	18.86	1.10795	4	54.05
FGL2_HUMAN	Fibroleukin	50.2	7.7	133.4	4	10.7	22.05	0.636364	11	49.72	1.17742	11	73.25	1.70455	11	65.66
FHR2_HUMAN	Complement factor H-related protein 2	30.6	6.0	82.6	1	4.1	10.41	1.01299	8	14.45	1.53226	8	10.78	1.38636	8	21.43
FIBA_HUMAN	Fibrinogen alpha chain	94.9	5.6	2468	45	42.1	9.88	0.857143	261	65.43	3.12097	285	137.11	3.41477	265	144.33
FIBB_HUMAN	Fibrinogen beta chain	55.9	9.3	2514.4	45	55.8	13.18	1.02597	220	73.25	4.25	224	116.47	3.93182	236	129.17
FIBG_HUMAN	Fibrinogen gamma chain	51.5	5.3	2105.8	43	49.9	12.04	1.11688	286	57.23	4.94355	292	118.77	3.90341	288	108.2
FIGL1_HUMAN	Fidgetin-like protein 1	74.0	9.0	81.7	2	3.1	24.61	0.584416	4	108.2	0.516129	4	18.87	0.806818	4	81.24
FINC_HUMAN	Fibronectin	262.5	5.4	3277	58	33.1	12.34	0.818182	331	58.49	1.56452	350	48.86	1.69318	340	72.34
FKB1A_HUMAN	Peptidyl-prolyl cis-trans isomerase FKBP1A	11.9	9.1	163.7	2	25.0	9.14	1.63636	6	17.29	1.26613	6	26.87	0.710227	6	23.21
FLNA_HUMAN	Filamin-A	280.6	5.7	650.5	15	6.4	14.86	0.701299	37	68.25	1.12903	37	70.35	1.44886	36	73.47
FLNB_HUMAN	Filamin-B	278.0	5.4	900.4	19	9.7	19.88	0.961039	47	78.34	1.20968	48	60.26	1.14773	47	66.02
FLNC_HUMAN	Filamin-C	290.8	5.6	533.4	10	4.6	10.45	0.675325	33	52.44	1.08065	33	41.02	1.47727	33	64.99
FLOT2_HUMAN	Flotillin-2	47.0	5.0	64.9	2	6.1	37.17	0.480519	2	87.33	0.467742	2	93.44	0.897727	2	3.94
FLRT2_HUMAN	Leucine-rich repeat transmembrane protein FLRT2	74.0	8.9	121.2	3	6.1	17.48	0.415584	4	9.13	0.5	4	26.81	1.09659	4	31.2
FMNL_HUMAN	Formin-like protein 1	121.8	5.4	52.2	2	1.4	507.06	1.15584	2	110.28	1.08871	2	59.08	0.863636	2	35.54
FMO3_HUMAN	Dimethylaniline monooxygenase [N-oxide-forming] 3	60.0	8.9	92	2	3.6	626.19	0.974026	2	69.87	0.467742	2	106.57	0.4375	2	24.41
FMOD_HUMAN	Fibromodulin	43.2	5.6	86.2	2	5.6	5.70	0.311688	6	33.54	0.508065	6	9.56	1.5	6	30.38
FOLR1_HUMAN	Folate receptor alpha	29.8	9.6	36.7	1	3.1	2.46	0.168831	4	34.08	0.491935	4	0.91	2.60795	4	34.09
FPPS_HUMAN	Farnesyl pyrophosphate synthase	48.2	5.8	29.8	1	2.9	14.45	0.818182	2	2.2	0.935484	2	27.16	1.04545	2	24.85
FREM2_HUMAN	FRAS1-related extracellular matrix protein 2	350.9	4.8	160.8	2	1.2	198.23	0.545455	6	19.94	0.604839	6	41.16	1.01705	6	31.97
FRIH_HUMAN	Ferritin heavy chain	21.2	5.2	292.9	6	27.9	14.92	0.792208	16	12.58	1.32258	16	34.31	1.47727	17	39.24
FRIL_HUMAN	Ferritin light chain	20.0	5.4	507.9	11	52.0	11.68	1.4026	60	33.46	2.05645	62	79.99	1.42614	63	63.74
FRM4B_HUMAN	FERM domain-containing protein 4B	118.0	9.4	118.8	4	1.9	11.44	0.402597	7	161.59	0.709677	7	71.2	1.63068	7	66.14
FSBP_HUMAN	Fibrinogen silencer-binding protein	34.7	6.7	51.1	2	5.0	436.99	0.363636	3	18.14	0.491935	3	7.25	1.25	3	12.31
FSHR_HUMAN	Follicle-stimulating hormone receptor	78.2	6.9	27.5	1	1.3	718.09	3.24675	2	1.48	4.14516	2	0.51	1.17045	2	1.98
FSIP2_HUMAN	Fibrous sheath-interacting protein 2	780.1	6.3	142.9	4	0.4	794.27	0.935065	3	102.18	1.37097	3	65.25	1.33523	3	38.07
FSTL1_HUMAN	Follistatin-related protein 1	35.0	5.3	51.4	1	2.6	9.29	0.246753	3	33.02	0.629032	3	7.38	2.30114	3	33.92
FUCO_HUMAN	Tissue alpha-L-fucosidase	53.7	6.4	497.3	9	28.1	69.34	0.857143	34	44.28	0.790323	35	37.87	0.806818	36	34
FUCO2_HUMAN	Plasma alpha-L-fucosidase	54.0	5.8	409.8	8	19.1	10.67	1.18182	44	34.95	1.14516	44	21.37	0.914773	43	35.58
FXR2_HUMAN	Fragile X mental retardation syndrome-related protein 2	74.2	5.9	56	2	1.8	51.95	1.15584	3	56.51	0.306452	3	68.22	0.244318	3	13.28
G3P_HUMAN	Glyceraldehyde-3-phosphate dehydrogenase	36.0	9.3	975.4	17	53.7	16.61	0.545455	68	41.61	0.612903	75	46.62	1.01136	66	46.98
G6PD_HUMAN	Glucose-6-phosphate 1-dehydrogenase	59.2	6.4	73.7	2	5.0	8.58	0.714286	3	81.99	0.846774	3	56.33	1.08523	3	74.3
G6PI_HUMAN	Glucose-6-phosphate isomerase	63.1	9.1	796.2	14	32.6	11.66	0.727273	63	68.15	0.879032	65	44.4	1.03409	63	56.54
GABR1_HUMAN	Gamma-aminobutyric acid type B receptor subunit 1	108.3	9.3	59.7	2	1.4	686.13	1.96104	4	75.25	3.96774	4	59.34	1.84659	4	12.85
GALC_HUMAN	Galactocerebrosidase	77.0	6.2	60.2	1	2.8	16.98	0.441558	2	20.83	0.629032	3	119.02	1.10795	2	112.3
GALE_HUMAN	UDP-glucose 4-epimerase	38.3	6.3	190.3	3	10.1	8.57	0.805195	3	28.84	0.620968	3	33.64	0.704545	3	45.73
GALM_HUMAN	Aldose 1-epimerase	37.7	6.2	163.8	3	12.0	9.12	0.584416	7	17.96	0.709677	7	10.46	1.10227	7	10.94
GALNS_HUMAN	N-acetylgalactosamine-6-sulfatase	58.0	6.3	192	5	9.8	17.08	0.493506	18	36.08	0.717742	18	32.18	1.32955	18	32.65
GALT8_HUMAN	Probable polypeptide N-acetylgalactosaminyltransferase 8	72.8	9.7	91.4	3	3.6	454.46	1.11688	3	74.6	1.43548	3	49.05	1.17614	3	106.97
GANAB_HUMAN	Neutral alpha-glucosidase AB	106.8	5.7	176.3	4	7.0	15.61	0.532468	5	77.58	0.693548	6	47.12	1.34659	5	48.81
GAS6_HUMAN	Growth arrest-specific protein 6	79.6	5.8	135.6	2	3.3	12.57	0.350649	8	59.9	0.330645	8	40.92	0.869318	8	94.27
GBB2_HUMAN	Guanine nucleotide-binding protein G(I)/G(S)/G(T) subunit beta-2	37.3	5.6	27.3	1	3.2	20.86	0.324675	3	5.19	0.516129	3	4.88	1.44318	3	8.82
GBLP_HUMAN	Guanine nucleotide-binding protein subunit beta-2-like 1	35.1	8.9	32.5	1	2.8	7.16	1.14286	2	0.36	1.17742	2	7.57	0.948864	2	7.2
GBP1_HUMAN	Interferon-induced guanylate-binding protein 1	67.9	5.9	68.2	2	2.9	14.70	3.68831	2	138.82	1.72581	2	11.38	0.426136	2	165.85
GBP6_HUMAN	Guanylate-binding protein 6	72.4	6.0	51.4	2	2.4	17.77	1.16883	3	43.79	1.33871	3	21.62	1.05114	3	37.47
GBRR1_HUMAN	Gamma-aminobutyric acid receptor subunit rho-1	55.8	9.2	29	1	1.5	1039.92	2.90909	4	6.22	0.83871	4	15.5	0.261364	4	11.38
GCC2_HUMAN	GRIP and coiled-coil domain-containing protein 2	195.8	5.0	50.8	2	1.4	628.20	1.19481	2	78.93	0.346774	2	111.41	0.267045	2	342.04
GCN1L_HUMAN	Translational activator GCN1	292.6	7.6	85.5	3	1.2	241.26	0.987013	3	20.84	1.19355	3	162.11	1.11364	3	185.45
GDF15_HUMAN	Growth/differentiation factor 15	34.1	11.5	174.5	3	13.3	12.66	0.831169	16	36.71	1.98387	15	13.26	2.30114	15	29.96
GDIB_HUMAN	Rab GDP dissociation inhibitor beta	50.6	6.1	543.5	10	25.6	10.04	0.558442	51	50.27	0.685484	54	33.4	1.14205	50	44.57
GDIR1_HUMAN	Rho GDP-dissociation inhibitor 1	23.2	4.9	131.1	3	18.6	12.44	0.935065	12	14.95	0.879032	12	18.49	0.857955	12	27.12
GDIR2_HUMAN	Rho GDP-dissociation inhibitor 2	23.0	4.9	437.5	11	61.7	13.86	2.66234	25	28.65	2.03226	25	33.39	0.698864	25	24.19
GELS_HUMAN	Gelsolin	85.6	5.9	2557	48	47.3	11.08	1.93506	321	48.57	2.47581	325	66.99	1.1875	342	55.83
GFPT1_HUMAN	Glutamine--fructose-6-phosphate aminotransferase [isomerizing] 1	78.8	6.7	71.4	1	2.4	7.63	0.597403	2	4.85	0.66129	2	5.52	1.01705	2	0.66
GFRP_HUMAN	GTP cyclohydrolase 1 feedback regulatory protein	9.7	6.1	188.4	4	66.7	11.05	0.493506	14	24.31	0.814516	14	23.59	1.51705	14	21.59
GG2L5_HUMAN	Putative golgin subfamily A member 2-like protein 5	12.0	5.4	33.3	1	8.2	711.48	0.792208	3	22.91	0.870968	3	9.64	1.01705	3	25.24
GGACT_HUMAN	Gamma-glutamylaminecyclotransferase	17.3	6.4	111.2	2	24.8	161.92	0.545455	8	36.83	0.806452	13	44.91	1.55682	8	51.13
GGH_HUMAN	Gamma-glutamyl hydrolase	35.9	6.8	979.2	18	45.6	10.82	0.662338	103	35.06	0.927419	104	37.85	1.19318	107	37.61
GGT1_HUMAN	Gamma-glutamyltranspeptidase 1	61.4	6.7	497.9	10	23.6	10.14	0.376623	41	46.25	0.459677	42	27.24	1.125	41	39.83
GGT6_HUMAN	Gamma-glutamyltransferase 6	50.5	5.6	176.3	4	10.8	9.08	0.61039	12	74.38	0.741935	12	25.02	1.11932	12	74.9
GILT_HUMAN	Gamma-interferon-inducible lysosomal thiol reductase	27.9	4.6	130	3	4.4	5.64	0.493506	17	59.86	1.21774	17	16.33	2.27273	17	72.34
GIMA8_HUMAN	GTPase IMAP family member 8	74.8	9.5	31.9	1	0.9	1036.46	1.16883	5	6.59	0.919355	5	21.86	0.721591	5	15.24
GINM1_HUMAN	Glycoprotein integral membrane protein 1	36.8	4.7	86.2	1	3.0	10.24	0.376623	2	2.6	0.548387	2	6.13	1.32955	2	3.52
GLCM_HUMAN	Glucosylceramidase	59.7	7.9	57.1	2	6.9	12.08	1.51948	2	8.15	1.28226	2	33.29	0.772727	2	24.65
GLRX1_HUMAN	Glutaredoxin-1	11.8	9.7	171.5	4	43.4	11.39	1.74026	15	47.39	2.29839	15	53.32	1.13636	19	29.82
GLU2B_HUMAN	Glucosidase 2 subunit beta	59.4	4.2	265.5	6	14.4	10.23	1.01299	13	25.72	0.91129	13	40.23	0.823864	13	26.27
GLYC_HUMAN	Serine hydroxymethyltransferase, cytosolic	53.0	8.6	44.6	1	4.1	21.31	0.714286	2	7.21	0.524194	2	8.26	0.676136	2	1.05
GLYG_HUMAN	Glycogenin-1	39.4	5.2	51.7	1	2.9	16.71	1.25974	4	23.48	1.50806	4	27.23	1.09659	4	6.97
GMFB_HUMAN	Glia maturation factor beta	16.7	5.1	84.3	2	13.4	8.29	1.42857	4	18.99	1.97581	4	44.84	1.26136	4	32.32
GMFG_HUMAN	Glia maturation factor gamma	16.8	5.0	146.9	3	18.3	11.89	2.15584	10	30.93	2.22581	10	33.95	0.948864	10	12.97
GMPPA_HUMAN	Mannose-1-phosphate guanyltransferase alpha	46.3	6.8	38.5	1	3.8	18.38	0.467532	2	8.54	0.516129	2	24.73	1.02841	2	15.94
GNA11_HUMAN	Guanine nucleotide-binding protein subunit alpha-11	42.1	5.4	140.8	2	9.5	8.46	0.311688	4	203.13	0.346774	8	68.3	0.869318	4	86.14
GNA12_HUMAN	Guanine nucleotide-binding protein subunit alpha-12	44.3	10.4	119.4	1	2.9	8.25	0.532468	3	26.56	0.435484	3	2.99	0.732955	3	29.25
GNA13_HUMAN	Guanine nucleotide-binding protein subunit alpha-13	44.0	9.1	125	2	5.6	7.64	0.454545	5	30.25	0.459677	5	9.89	0.926136	5	37.44
GNAI1_HUMAN	Guanine nucleotide-binding protein G(i) subunit alpha-1	40.3	5.6	306.5	5	17.2	9.23	0.285714	10	69.21	0.354839	12	50.75	1.14773	10	37.92
GNAI2_HUMAN	Guanine nucleotide-binding protein G(i) subunit alpha-2	40.4	5.2	348.2	5	19.2	13.14	0.38961	16	43.25	0.491935	17	38.68	1.02841	17	35.78
GNAI3_HUMAN	Guanine nucleotide-binding protein G(k) subunit alpha	40.5	5.4	202.5	3	11.0	8.72	0.311688	7	78.56	0.370968	8	35.24	1.05114	7	45.34
GNAS1_HUMAN	Guanine nucleotide-binding protein G(s) subunit alpha isoforms XLas	111.0	4.8	185.4	3	3.1	9.92	0.584416	6	46.29	0.596774	6	47.47	0.931818	6	32.8
GNS_HUMAN	N-acetylglucosamine-6-sulfatase	62.0	9.4	781.4	16	29.7	12.02	1.15584	105	29.39	1.08871	106	41.59	0.869318	105	24.94
GOLM1_HUMAN	Golgi membrane protein 1	45.3	4.8	378.3	9	21.4	8.45	0.428571	23	67.94	0.419355	23	44.74	0.892045	23	40.71
GP112_HUMAN	Probable G-protein coupled receptor 112	333.2	5.8	55.1	2	0.6	13.98	2.28571	3	27.96	1.85484	3	50.93	0.744318	3	21.59
GP155_HUMAN	Integral membrane protein GPR155	96.9	6.5	36.5	1	1.0	13.72	0.298701	2	5.14	0.685484	2	6.87	2.09091	2	1.72
GP158_HUMAN	Probable G-protein coupled receptor 158	135.4	9.4	54.5	2	1.3	327.73	2.37662	3	10.3	4.04032	3	20.53	1.55682	3	29.97
GP180_HUMAN	Integral membrane protein GPR180	49.4	7.2	151.1	3	5.9	9.82	0.493506	5	62.16	0.709677	6	45.22	1.49432	5	106.77
GP1BA_HUMAN	Platelet glycoprotein Ib alpha chain	68.9	6.2	140.5	3	5.3	213.37	1.23377	15	16.55	1.44355	15	14.99	1.07386	15	24.07
GPC1_HUMAN	Glypican-1	61.6	7.8	292.7	6	13.1	8.90	0.675325	14	118.67	0.685484	14	39.64	0.931818	14	64.07
GPC3_HUMAN	Glypican-3	65.5	5.9	30.8	1	1.6	23.16	0.493506	2	13.65	0.596774	2	10.83	1.10795	2	2.79
GPC5B_HUMAN	G-protein coupled receptor family C group 5 member B	44.8	9.6	113	2	6.0	10.24	0.571429	8	36.89	0.467742	8	59.54	0.755682	8	46.66
GPC5C_HUMAN	G-protein coupled receptor family C group 5 member C	48.2	9.6	424.5	7	22.9	7.42	0.324675	16	45.9	0.330645	16	38.27	0.9375	16	21.01
GPC6_HUMAN	Glypican-6	62.7	5.2	32.1	1	1.1	58.50	3.87013	3	10.07	40.9435	3	17.53	9.67614	3	25.55
GPDA_HUMAN	Glycerol-3-phosphate dehydrogenase [NAD(+)], cytoplasmic	37.5	5.8	123.9	3	9.7	502.54	0.623377	8	33.89	0.620968	8	53.05	0.903409	8	31.14
GPNMB_HUMAN	Transmembrane glycoprotein NMB	63.9	6.2	34.7	1	1.6	13.85	0.493506	2	6.17	0.822581	2	0.4	1.52273	2	5.76
GPVI_HUMAN	Platelet glycoprotein VI	36.8	10.1	59.6	1	5.0	362.11	0.831169	7	21.93	0.725806	7	24.87	0.801136	7	12.03
GPX3_HUMAN	Glutathione peroxidase 3	25.6	9.1	329.8	8	28.3	13.05	1.66234	70	11.64	0.701613	71	22.65	0.386364	72	26.49
GRAN_HUMAN	Grancalcin	24.0	4.9	130.9	2	9.7	11.27	1.24675	7	19.75	1.3629	7	23.93	1	7	43.61
GRB2_HUMAN	Growth factor receptor-bound protein 2	25.2	5.9	158	3	13.8	528.21	1.77922	6	27.23	1.90323	6	25.29	0.977273	6	36.29
GRDN_HUMAN	Girdin	215.9	5.8	62.5	1	0.7	4.41	1.37662	3	6.59	1.62097	3	0.76	1.07386	3	5.83
GRHPR_HUMAN	Glyoxylate reductase/hydroxypyruvate reductase	35.6	7.9	47.4	1	4.9	7.00	0.467532	2	43.52	0.41129	2	2.41	0.806818	2	46.28
GRIA3_HUMAN	Glutamate receptor 3	101.1	9.3	58.8	2	1.1	771.32	2.48052	2	1.11	0.693548	2	2.34	0.255682	2	3.45
GRP75_HUMAN	Stress-70 protein, mitochondrial	73.6	5.8	214.4	5	7.2	454.20	1.07792	13	93.6	1.16935	15	62.4	1.03977	16	48.33
GRP78_HUMAN	78 kDa glucose-regulated protein	72.3	4.9	1047.8	19	35.9	13.02	0.883117	72	48.28	0.919355	72	49.5	0.954545	72	33.15
GRPE2_HUMAN	GrpE protein homolog 2, mitochondrial	25.4	9.0	28.3	1	4.9	489.43	3.62338	2	14	1.19355	2	16.32	0.301136	2	2.28
GSH1_HUMAN	Glutamate--cysteine ligase catalytic subunit	72.7	5.7	25.6	1	1.6	745.56	0.779221	2	8.47	1.99194	2	2.21	2.34659	2	6.25
GSHB_HUMAN	Glutathione synthetase	52.4	5.6	152.4	2	5.7	11.29	0.792208	5	26.26	0.725806	5	42.92	0.840909	5	27.82
GSHR_HUMAN	Glutathione reductase, mitochondrial	56.2	9.6	158.2	4	12.8	10.63	0.636364	8	17.54	0.669355	8	10.85	0.948864	8	20.21
GSTA1_HUMAN	Glutathione S-transferase A1	25.6	9.4	522.2	11	40.1	10.43	0.38961	53	56.22	0.564516	53	35.94	1.35227	53	41.82
GSTM3_HUMAN	Glutathione S-transferase Mu 3	26.5	5.2	343	7	28.9	8.65	0.376623	11	44.31	0.475806	11	46.22	1.15341	11	25.21
GSTO1_HUMAN	Glutathione S-transferase omega-1	27.5	6.3	210.9	4	12.9	12.93	0.909091	14	37.95	1.08871	14	23.57	1.16477	15	28.66
GSTP1_HUMAN	Glutathione S-transferase P	23.3	5.3	483.4	10	48.6	9.83	0.675325	45	32.86	0.895161	44	32.24	1.19318	48	26.63
GTR5_HUMAN	Solute carrier family 2, facilitated glucose transporter member 5	54.9	5.7	128.4	3	5.2	9.22	0.272727	14	42.84	0.346774	16	20.99	1.18182	14	28.89
GUC2A_HUMAN	Guanylin	12.4	4.4	121.1	3	18.3	13.88	2.75325	9	40.1	3.70161	9	50.04	1.23295	9	24.41
GUC2B_HUMAN	Guanylate cyclase activator 2B	12.1	6.1	185.4	3	18.8	6.47	2.62338	20	57.93	2.8629	20	76.99	0.994318	20	28.11
GVIN1_HUMAN	Interferon-induced very large GTPase 1	278.9	6.1	151.2	3	1.1	11.29	0.363636	4	95.19	1.60484	7	120.78	2.97727	4	42.4
H2A1H_HUMAN	Histone H2A type 1-H	13.9	11.3	107.4	2	21.9	14.17	0.961039	8	42.09	1.37903	8	40.29	1.30682	8	46.25
H2A2B_HUMAN	Histone H2A type 2-B	14.0	11.3	105.1	2	24.6	13.98	1.19481	4	21.52	1.42742	5	37.57	0.982955	5	47.63
H2AB1_HUMAN	Histone H2A-Bbd type 1	12.7	11.4	44.6	1	13.9	11.09	3.4026	2	30.1	1.39516	2	14.75	0.375	2	46.37
H2AY_HUMAN	Core histone macro-H2A.1	39.6	10.3	99.1	3	5.1	45.50	1.79221	7	34.52	1.04839	7	29.25	0.534091	7	43.85
H2B1A_HUMAN	Histone H2B type 1-A	14.2	10.8	304.9	5	40.2	14.39	1.24675	28	48.99	1.3871	28	38.42	0.982955	29	73.65
H2B1K_HUMAN	Histone H2B type 1-K	13.9	10.8	306.7	5	41.3	14.31	1.15584	34	46.07	1.66935	33	32.45	1.27841	34	58.31
H33_HUMAN	Histone H3.3	15.3	11.9	95.2	3	14.0	12.33	1.16883	8	19.59	2.17742	8	14.34	1.71023	8	22.97
H4_HUMAN	Histone H4	11.4	11.8	443.2	8	50.5	16.39	1.28571	43	30.11	1.84677	43	38.43	1.3125	43	46.16
HABP2_HUMAN	Hyaluronan-binding protein 2	62.6	6.1	92	2	2.7	13.42	1.03896	4	32.28	2.62903	4	7.92	2.31818	4	38.31
HAVR2_HUMAN	Hepatitis A virus cellular receptor 2	33.4	5.4	223.4	6	11.6	10.33	0.727273	20	22.12	0.895161	21	74.69	1.08523	21	52.61
HBA_HUMAN	Hemoglobin subunit alpha	15.2	9.4	1908.5	30	95.1	16.58	1.25974	324	72.78	3.54032	354	204.4	2.92614	367	166.09
HBB_HUMAN	Hemoglobin subunit beta	16.0	6.9	2489.4	39	96.6	13.48	1.11688	659	54.74	3.87097	678	114.2	3.91477	787	136.48
HBD_HUMAN	Hemoglobin subunit delta	16.0	9.1	1605.1	25	92.5	13.70	1.03896	461	51.94	3.99194	472	117.81	4.25568	540	137.65
HBG1_HUMAN	Hemoglobin subunit gamma-1	16.1	6.8	742.2	13	83.0	8.10	1.07792	131	59.03	4.19355	138	136.78	4.49432	165	168.45
HCD2_HUMAN	3-hydroxyacyl-CoA dehydrogenase type-2	26.9	9.1	57.8	1	7.7	13.04	0.584416	2	46.42	1.02419	3	33.82	1.28977	2	33.58
HD_HUMAN	Huntingtin	347.4	5.8	35	1	0.3	7.26	1.22078	7	14.11	3.20968	7	26.35	2.39773	7	29.88
HDHD2_HUMAN	Haloacid dehalogenase-like hydrolase domain-containing protein 2	28.5	5.8	85.6	2	16.2	19.73	0.311688	3	43.44	0.290323	3	35.47	0.835227	3	40.27
HEBP1_HUMAN	Heme-binding protein 1	21.1	5.6	67.9	1	9.0	10.06	0.701299	5	33.8	0.532258	5	72.69	0.693182	5	48.89
HEBP2_HUMAN	Heme-binding protein 2	22.9	4.4	169.2	3	17.6	13.67	1.18182	13	22.17	0.879032	14	22.09	0.727273	14	27.01
HECD1_HUMAN	E3 ubiquitin-protein ligase HECTD1	289.2	5.1	58.6	1	0.4	39.61	0.636364	2	6.15	0.717742	2	14.98	1.03409	2	8.78
HEMO_HUMAN	Hemopexin	51.6	6.6	1988.3	38	54.5	11.50	1.31169	357	40.36	1.96774	368	87.48	1.35795	371	64.81
HEP2_HUMAN	Heparin cofactor 2	57.0	6.4	646.7	15	34.7	10.81	1.15584	39	41.55	2.40323	41	39.5	1.86932	39	49.33
HERC2_HUMAN	E3 ubiquitin-protein ligase HERC2	526.9	5.8	84	3	0.4	9.96	3.62338	9	44.63	2.32258	9	44.19	0.585227	9	72.91
HEXA_HUMAN	Beta-hexosaminidase subunit alpha	60.7	4.9	921.4	19	26.7	11.84	0.675325	69	33.62	0.862903	69	31.38	1.18182	69	32.78
HEXB_HUMAN	Beta-hexosaminidase subunit beta	63.1	6.3	982.7	18	33.6	12.78	0.753247	75	43.37	0.935484	76	30.1	1.09091	76	33.65
HEYL_HUMAN	Hairy/enhancer-of-split related with YRPW motif-like protein	35.1	11.4	34.3	1	3.0	799.15	1.05195	3	2.22	0.637097	3	14.64	0.551136	3	14.97
HGD_HUMAN	Homogentisate 1,2-dioxygenase	49.9	6.6	94.5	2	8.3	5.35	0.766234	6	45.86	1.21774	6	90.65	1.44886	6	64.91
HGFA_HUMAN	Hepatocyte growth factor activator	70.6	7.3	211.4	4	8.1	10.26	3.18182	12	50.29	2.03226	12	30.57	0.585227	12	33.01
HINT1_HUMAN	Histidine triad nucleotide-binding protein 1	13.8	6.5	35.2	1	5.6	13.18	0.298701	4	14.45	0.532258	4	5.65	1.625	4	14.18
HKDC1_HUMAN	Putative hexokinase HKDC1	102.5	6.9	89	3	2.2	42.77	1.85714	24	55.94	1.12097	24	80.15	0.551136	24	35.89
HMCN1_HUMAN	Hemicentin-1	613.0	6.1	354.4	5	1.0	15.20	0.558442	54	43.24	0.717742	52	33.54	1.23295	54	47.54
HMDH_HUMAN	3-hydroxy-3-methylglutaryl-coenzyme A reductase	97.4	6.3	31.6	1	1.4	60.97	2.85714	2	2.33	2.16935	2	2.4	0.693182	2	0.08
HMMR_HUMAN	Hyaluronan mediated motility receptor	84.0	5.6	64.6	1	1.2	11.55	1.5974	4	6.14	0.629032	4	13.98	0.357955	4	7.91
HNRDL_HUMAN	Heterogeneous nuclear ribonucleoprotein D-like	46.4	10.0	98.2	3	5.2	397.77	1.28571	5	40.14	1.91935	5	97.43	1.36364	5	136.59
HNRPF_HUMAN	Heterogeneous nuclear ribonucleoprotein F	45.6	5.3	73.7	2	8.0	18.78	1.19481	4	34.21	0.612903	4	58.74	0.471591	4	24.62
HNRPK_HUMAN	Heterogeneous nuclear ribonucleoprotein K	50.9	5.3	107.2	2	5.0	10.21	1.31169	5	13.47	1.91935	5	18.59	1.33523	5	16.41
HNRPL_HUMAN	Heterogeneous nuclear ribonucleoprotein L	64.1	9.2	42	1	5.9	14.08	1.5974	2	28.43	2.22581	2	43.74	1.27273	2	14.03
HNRPU_HUMAN	Heterogeneous nuclear ribonucleoprotein U	90.5	5.7	27.3	1	1.5	3.85	3.37662	2	3.42	4.87097	2	5	1.31818	2	1.58
HPPD_HUMAN	4-hydroxyphenylpyruvate dioxygenase	44.9	6.6	136.7	3	12.5	14.98	1.02597	12	28.81	0.741935	12	24.81	0.664773	12	31.35
HPRT_HUMAN	Hypoxanthine-guanine phosphoribosyltransferase	24.6	6.2	157.3	3	15.1	8.42	0.766234	9	58.62	0.887097	9	29.83	1.0625	9	36.13
HPT_HUMAN	Haptoglobin	45.2	6.1	2536.5	47	45.8	13.50	4.67532	484	101.1	4	485	134.83	0.818182	486	44.73
HPTR_HUMAN	Haptoglobin-related protein	39.0	6.7	1663.5	26	27.0	13.30	4.44156	285	103.54	3.99194	283	124.35	0.8125	281	42.73
HRG_HUMAN	Histidine-rich glycoprotein	59.5	7.2	487.5	10	24.6	11.66	0.909091	43	48.71	2.53226	45	37.11	2.39205	44	66.6
HS71L_HUMAN	Heat shock 70 kDa protein 1-like	70.3	5.7	734.1	15	23.9	9.17	0.883117	59	43.82	0.758065	59	37.01	0.778409	59	36.23
HS90A_HUMAN	Heat shock protein HSP 90-alpha	84.6	4.8	881.7	15	22.4	13.29	0.727273	50	42.65	0.959677	48	27.27	1.16477	49	34.88
HS90B_HUMAN	Heat shock protein HSP 90-beta	83.2	4.8	803.5	14	21.4	11.90	0.675325	43	40.26	0.919355	43	33.38	1.23864	44	48.6
HSB11_HUMAN	Heat shock protein beta-11	16.3	4.8	165.4	3	35.4	15.41	0.948052	7	31.69	1.8629	7	17.26	1.79545	7	26.77
HSP71_HUMAN	Heat shock 70 kDa protein 1A/1B	70.0	5.4	1157.4	23	41.3	9.81	0.883117	87	40.37	0.741935	87	35.05	0.784091	86	34.24
HSP7C_HUMAN	Heat shock cognate 71 kDa protein	70.9	5.2	1434.3	27	44.7	11.07	0.649351	111	38.57	0.709677	113	43.93	0.954545	113	31.57
HSPB1_HUMAN	Heat shock protein beta-1	22.8	6.0	177.9	4	43.4	9.91	0.623377	12	47.15	0.653226	11	52.31	0.943182	11	51.4
HV102_HUMAN	Ig heavy chain V-I region HG3	12.9	9.8	49.9	1	9.4	9.88	2.36364	3	9.14	2.56452	3	9.92	0.994318	3	2.9
HV103_HUMAN	Ig heavy chain V-I region V35	13.0	10.1	89.6	2	23.1	6.39	1.16883	14	21.19	1.55645	14	23.4	1.22159	14	22.44
HV208_HUMAN	Ig heavy chain V-II region SESS	16.3	7.5	57.3	2	8.2	13.40	0.831169	9	56.32	1.62903	9	14.88	1.77841	9	55.55
HV209_HUMAN	Ig heavy chain V-II region ARH-77	16.2	9.3	78.2	1	6.2	8.19	0.961039	13	19.65	1.5	13	31.41	1.42614	13	45.48
HV301_HUMAN	Ig heavy chain V-III region TRO	13.5	10.2	49.8	1	8.2	7.68	1.02597	4	3.63	0.701613	4	7.39	0.625	4	7.46
HV302_HUMAN	Ig heavy chain V-III region WEA	12.2	9.5	144.6	3	36.0	7.72	1.58442	13	38.23	1.52419	13	33.47	0.875	13	14.43
HV305_HUMAN	Ig heavy chain V-III region BRO	13.2	7.0	184.3	3	34.2	95.38	1.42857	28	40.25	0.887097	28	82.81	0.568182	28	40.22
HV306_HUMAN	Ig heavy chain V-III region BUT	12.4	10.0	269.2	7	35.7	7.25	1.75325	24	26.49	1.32258	24	38.78	0.693182	24	27.46
HV307_HUMAN	Ig heavy chain V-III region CAM	13.7	10.1	427.3	8	36.9	8.88	1.5974	34	47	1.01613	34	51.86	0.579545	34	20
HV308_HUMAN	Ig heavy chain V-III region GA	13.2	10.3	76.6	1	15.6	20.61	1.88312	4	3.4	1.26613	4	7.45	0.613636	4	8.07
HV310_HUMAN	Ig heavy chain V-III region HIL	13.6	9.9	54.2	1	13.2	61.18	1.57143	5	22.14	1.3629	5	18.55	0.795455	5	21.47
HV312_HUMAN	Ig heavy chain V-III region BUR	13.0	10.2	38.2	1	6.7	16.19	1.51948	2	1.14	1.42742	2	3.52	0.863636	2	4.66
HV318_HUMAN	Ig heavy chain V-III region TUR	12.4	10.6	139.4	2	26.7	7.77	1.32468	14	22.11	1.16129	14	21.65	0.801136	14	17.08
HV319_HUMAN	Ig heavy chain V-III region JON	12.6	10.2	86.8	2	16.5	22.30	0.883117	10	48.06	0.782258	10	42.69	0.806818	10	26.93
HV320_HUMAN	Ig heavy chain V-III region GAL	12.7	9.6	327.4	6	34.5	9.15	1.25974	32	23.95	0.935484	32	29.78	0.676136	32	18.39
HXK1_HUMAN	Hexokinase-1	102.4	6.4	76	2	2.2	10.66	0.844156	4	42.8	1.34677	5	46.56	1.50568	4	70.18
HXK3_HUMAN	Hexokinase-3	99.0	5.1	65.8	2	3.5	10.18	1.45455	4	49.72	1.25806	4	86.16	0.789773	4	28.56
HYES_HUMAN	Bifunctional epoxide hydrolase 2	62.6	5.9	61.7	2	3.1	9.60	0.207792	4	53.59	0.379032	4	42.14	1.65909	4	30.67
HYI_HUMAN	Putative hydroxypyruvate isomerase	30.4	5.2	30.4	1	4.0	16.33	1.46753	4	15.55	18.0968	4	10.71	11.2386	4	20.79
HYOU1_HUMAN	Hypoxia up-regulated protein 1	111.3	5.0	151.4	2	4.0	12.29	1.98701	7	15.11	1.87097	7	15.8	0.835227	8	14.98
I10R2_HUMAN	Interleukin-10 receptor subunit beta	37.0	4.9	61.5	1	3.4	7.87	0.480519	4	11.39	0.75	4	4.08	1.4375	4	14.3
I18BP_HUMAN	Interleukin-18-binding protein	21.1	8.0	92	2	10.3	5.83	0.636364	11	45.55	0.701613	11	45.91	1.01705	11	27.35
IAH1_HUMAN	Isoamyl acetate-hydrolyzing esterase 1 homolog	27.6	5.0	90.6	2	10.9	47.89	1.93506	11	73.91	0.887097	11	50.2	0.420455	11	112.05
IBP2_HUMAN	Insulin-like growth factor-binding protein 2	34.8	8.9	84	2	9.8	5.15	0.935065	5	32.66	1	5	53.25	0.971591	5	47.46
IBP6_HUMAN	Insulin-like growth factor-binding protein 6	25.3	9.8	138.7	2	10.4	16.45	1.64935	7	51.29	2.12903	7	38.31	1.18182	7	28.17
IBP7_HUMAN	Insulin-like growth factor-binding protein 7	29.1	9.6	175	3	9.9	12.98	0.298701	11	30.48	0.887097	11	39.27	2.75	11	47.52
IC1_HUMAN	Plasma protease C1 inhibitor	55.1	6.1	2072.9	37	34.8	13.12	0.701299	261	41.34	0.991935	264	40.31	1.3125	262	50.22
ICAM2_HUMAN	Intercellular adhesion molecule 2	30.6	7.9	191.3	3	14.9	11.60	0.584416	8	53.76	0.629032	8	28.98	0.982955	8	28.91
ICOSL_HUMAN	ICOS ligand	33.3	5.0	227.8	4	11.9	22.21	0.415584	30	37.99	0.556452	30	60.74	1.25	30	45.04
IDH3A_HUMAN	Isocitrate dehydrogenase [NAD] subunit alpha, mitochondrial	39.6	6.5	105.4	3	2.7	23.07	3.06494	32	74.17	2.29839	32	61.71	0.664773	30	11.72
IDHC_HUMAN	Isocitrate dehydrogenase [NADP] cytoplasmic	46.6	6.6	592.1	10	29.2	9.78	0.402597	41	50.55	0.403226	41	47.19	0.914773	41	36.65
IDHP_HUMAN	Isocitrate dehydrogenase [NADP], mitochondrial	50.9	9.6	68.2	2	4.0	12.26	0.545455	2	17.93	1.04839	2	19.24	1.74432	2	1.27
IDS_HUMAN	Iduronate 2-sulfatase	61.8	5.1	85.4	2	6.9	203.31	0.623377	5	18.94	0.379032	5	39.63	0.5625	5	58.28
IF122_HUMAN	Intraflagellar transport protein 122 homolog	141.7	6.1	29.3	1	0.6	46.94	3.20779	2	6.08	1.80645	2	2.49	0.517045	2	3.59
IF172_HUMAN	Intraflagellar transport protein 172 homolog	197.5	5.7	63.2	2	1.1	377.27	1.75325	4	83.63	1.51613	4	160.87	0.789773	4	544.68
IF4A1_HUMAN	Eukaryotic initiation factor 4A-I	46.1	5.2	41.4	1	3.7	11.91	0.623377	2	19.36	0.540323	2	15.44	0.795455	2	3.83
IF4E_HUMAN	Eukaryotic translation initiation factor 4E	25.1	5.8	47.4	1	3.2	15.36	0.675325	3	32.94	0.540323	3	7.55	0.732955	3	25.06
IF4G2_HUMAN	Eukaryotic translation initiation factor 4 gamma 2	102.3	6.8	93.9	3	2.2	14.46	1.19481	5	55.2	2.41129	5	61.07	1.84091	5	7.47
IF4G3_HUMAN	Eukaryotic translation initiation factor 4 gamma 3	176.5	5.1	97.6	2	0.8	51.70	2.90909	7	92.59	0.927419	7	70.97	0.289773	7	47.12
IF5A1_HUMAN	Eukaryotic translation initiation factor 5A-1	16.8	4.9	161.7	3	15.6	19.94	0.558442	9	74.09	0.758065	9	44.36	1.25	9	51.28
IF6_HUMAN	Eukaryotic translation initiation factor 6	26.6	4.4	197.6	4	27.3	14.76	0.727273	5	32.97	0.75	7	60.15	0.829545	5	77.32
IFFO2_HUMAN	Intermediate filament family orphan 2	57.3	4.7	32	1	1.5	10.05	0.233766	4	38.27	0.346774	4	13.87	1.34659	4	26.91
IFNW1_HUMAN	Interferon omega-1	22.3	10.1	36.1	1	5.6	25.83	1.58442	4	5.83	1.23387	4	13.79	0.715909	4	13.02
IGHA1_HUMAN	Ig alpha-1 chain C region	37.6	6.1	1577.9	26	54.4	15.05	1.2987	494	45.28	0.975806	503	54.25	0.710227	508	26.39
IGHA2_HUMAN	Ig alpha-2 chain C region	36.5	5.7	1263.7	21	43.5	15.67	1.35065	331	40.62	1.00806	339	44.87	0.704545	347	30.39
IGHG1_HUMAN	Ig gamma-1 chain C region	36.1	9.4	1621.6	27	57.0	114.80	1.36364	464	59.56	1.41935	466	62.32	0.960227	472	36.61
IGHG2_HUMAN	Ig gamma-2 chain C region	35.9	8.8	1125.2	20	47.9	86.43	1.88312	344	51.21	1.29032	346	52.47	0.625	353	41.34
IGHG3_HUMAN	Ig gamma-3 chain C region	41.3	9.4	977.9	18	37.7	127.03	1.83117	281	44.21	1.54839	283	58.95	0.784091	291	53.34
IGHG4_HUMAN	Ig gamma-4 chain C region	35.9	7.8	1288.6	25	75.8	173.06	1.80519	259	51.15	1.6129	260	49.74	0.806818	265	37.06
IGHM_HUMAN	Ig mu chain C region	49.3	6.4	1331.3	24	38.5	11.78	1.2987	278	39.3	2.21774	290	61.47	1.625	289	52.14
IGJ_HUMAN	Immunoglobulin J chain	18.1	5.0	471.3	8	34.0	12.30	0.87013	60	51.91	1.21774	60	45.26	1.20455	60	39.94
IGKC_HUMAN	Ig kappa chain C region	11.6	5.5	2024.7	27	90.6	17.74	1.45455	1507	50.51	1.94355	1544	69.98	1.25	1651	50.4
IGLL1_HUMAN	Immunoglobulin lambda-like polypeptide 1	22.9	11.1	281.8	5	15.5	172.09	1.11688	35	68.27	0.798387	35	55.43	0.676136	38	45.28
IGLL5_HUMAN	Immunoglobulin lambda-like polypeptide 5	23.0	10.0	1646.8	25	51.4	12.73	1.48052	453	67.16	1.34677	454	83.46	0.857955	463	30.36
IGS10_HUMAN	Immunoglobulin superfamily member 10	290.7	9.9	33.2	1	0.3	766.90	2.14286	4	12.01	10.9435	4	11.25	4.68182	4	7.61
IGSF8_HUMAN	Immunoglobulin superfamily member 8	65.0	9.1	246.9	4	7.0	12.60	0.935065	53	25.37	1.22581	51	20.97	1.15341	53	21.08
IL17D_HUMAN	Interleukin-17D	21.9	10.3	27.1	1	5.9	34.62	0.766234	5	24.29	2.28226	5	9.29	2.73864	5	19.03
IL1AP_HUMAN	Interleukin-1 receptor accessory protein	65.4	9.2	125.3	2	3.7	7.01	1.67532	10	25.18	1.32258	10	20.39	0.721591	10	18.81
IL1RA_HUMAN	Interleukin-1 receptor antagonist protein	20.0	5.8	199.9	3	19.8	25.91	0.441558	9	21.4	0.459677	9	23.64	0.965909	9	23.44
IL6RB_HUMAN	Interleukin-6 receptor subunit beta	103.5	5.6	160.4	4	5.0	14.09	0.376623	13	25.32	0.508065	13	29.09	1.22159	13	22.07
ILEU_HUMAN	Leukocyte elastase inhibitor	42.7	5.9	480.3	9	24.5	9.54	1.14286	30	34.46	1.15323	31	33.92	0.960227	31	47.01
ILK_HUMAN	Integrin-linked protein kinase	51.4	9.3	118.2	4	2.9	126.30	2.16883	17	134.14	0.540323	17	154.64	0.227273	17	22.59
IMB1_HUMAN	Importin subunit beta-1	97.1	4.5	126.4	3	6.6	16.16	1.09091	7	61.87	1.3871	7	46.8	0.920455	6	42.43
INAR2_HUMAN	Interferon alpha/beta receptor 2	57.7	4.2	113.4	3	3.7	468.45	0.987013	10	31.05	1.41129	10	66.37	1.30114	10	37.89
INVO_HUMAN	Involucrin	68.4	4.5	173.9	4	9.1	13.74	0.623377	6	71.31	0.346774	6	50.84	0.517045	6	30.47
IPMK_HUMAN	Inositol polyphosphate multikinase	47.2	7.9	28.7	1	2.4	411.63	3.42857	3	27.74	2.1129	3	50.87	0.5625	3	21.1
IPO9_HUMAN	Importin-9	115.9	4.6	26.6	1	0.8	36.69	0.480519	2	2.67	0.395161	2	8.25	0.75	2	5.57
IPSP_HUMAN	Plasma serine protease inhibitor	45.6	9.8	1103.1	18	46.6	9.57	0.311688	146	55.82	0.548387	148	20.62	1.55682	148	53.78
IPYR_HUMAN	Inorganic pyrophosphatase	32.6	5.5	98.7	2	8.0	11.29	1.16883	4	32.56	0.83871	4	20.85	0.693182	5	49.1
IPYR2_HUMAN	Inorganic pyrophosphatase 2, mitochondrial	37.9	7.8	75.1	2	11.4	38.19	1.15584	3	44	1.34677	3	42.28	1.06818	3	2.47
IQEC2_HUMAN	IQ motif and SEC7 domain-containing protein 2	161.6	9.5	28.4	1	0.6	755.39	1	3	6.43	1.3871	3	5.39	1.26136	3	8.03
IQGA1_HUMAN	Ras GTPase-activating-like protein IQGAP1	189.1	6.1	424.5	8	8.1	17.39	1.1039	21	63.49	0.991935	21	52.37	0.835227	22	37.08
IRF7_HUMAN	Interferon regulatory factor 7	54.2	5.9	52.8	1	1.8	787.84	1.44156	4	6.91	1.6371	4	14.8	1.03977	4	10.89
ISK1_HUMAN	Pancreatic secretory trypsin inhibitor	8.5	9.2	60.1	1	10.1	15.64	2.46753	3	8.7	5.1129	3	8.04	1.89205	3	1.22
ISLR_HUMAN	Immunoglobulin superfamily containing leucine-rich repeat protein	46.0	4.9	293.8	4	12.4	12.14	1.05195	16	41.53	2.02419	16	20.25	1.75568	16	41.5
ISOC2_HUMAN	Isochorismatase domain-containing protein 2, mitochondrial	22.3	9.2	81	1	12.7	19.90	1.67532	2	0.81	0.645161	3	23.49	0.426136	3	22.41
IST1_HUMAN	IST1 homolog	39.7	5.1	585.8	11	25.3	12.15	0.506494	29	51.03	0.5	32	31.69	0.954545	28	37.73
ITAM_HUMAN	Integrin alpha-M	127.1	7.0	69.2	1	0.9	9.04	1.97403	3	28.69	2.53226	3	32.92	1.17045	3	10.6
ITIH1_HUMAN	Inter-alpha-trypsin inhibitor heavy chain H1	101.3	6.3	1084.5	19	25.9	12.28	1.31169	92	42.99	2.1371	93	50.62	1.5	92	35.1
ITIH2_HUMAN	Inter-alpha-trypsin inhibitor heavy chain H2	106.4	6.4	1953.2	36	39.9	12.58	3.38961	232	59.02	1.90323	228	50.94	0.539773	234	30.24
ITIH3_HUMAN	Inter-alpha-trypsin inhibitor heavy chain H3	99.8	5.4	680.1	14	18.8	172.68	2.42857	55	45.67	1.80645	55	54.53	0.681818	63	31.27
ITIH4_HUMAN	Inter-alpha-trypsin inhibitor heavy chain H4	103.3	6.5	2495.3	43	39.0	13.42	1.03896	468	60.56	1.71774	492	68.91	1.47727	475	72.18
ITLN1_HUMAN	Intelectin-1	34.9	5.6	263.3	5	19.2	12.49	0.662338	17	42.61	0.798387	17	47.22	1.22727	16	38.9
ITM2B_HUMAN	Integral membrane protein 2B	30.3	4.9	117	2	7.5	9.03	0.298701	8	17.55	0.395161	8	15.99	1.22727	8	21.03
ITPR3_HUMAN	Inositol 1,4,5-trisphosphate receptor type 3	303.9	6.0	85.2	3	0.9	303.68	3.96104	3	124.4	1.33065	3	58.57	0.306818	3	156.7
IV4F8_HUMAN	Putative V-set and immunoglobulin domain-containing-like protein IGHV4OR15-8	13.6	10.3	64.4	2	10.6	8.18	0.857143	2	17.86	1.28226	2	22.07	1.375	2	4.09
JAM1_HUMAN	Junctional adhesion molecule A	32.6	9.1	107.5	3	15.4	6.54	0.493506	7	89.33	1.00806	7	38.77	1.85795	7	45.05
JAM3_HUMAN	Junctional adhesion molecule C	35.0	8.8	125.5	3	8.1	11.57	1.37662	7	9.93	1.69355	7	8.56	1.13068	7	9.25
JIP4_HUMAN	C-Jun-amino-terminal kinase-interacting protein 4	146.1	4.9	86	1	1.3	12.59	0.285714	2	19.09	0.435484	2	7.11	1.40909	2	11.86
JKIP1_HUMAN	Janus kinase and microtubule-interacting protein 1	73.2	5.8	48.2	1	1.9	16.47	0.571429	4	6.43	0.645161	4	9.29	1.03977	4	10.69
JPH1_HUMAN	Junctophilin-1	71.6	9.9	53	2	2.9	453.46	0.714286	3	92.59	0.556452	3	18	0.710227	3	68.12
K0100_HUMAN	UPF0378 protein KIAA0100	253.5	6.7	62.8	2	0.6	6.72	0.688312	8	313.88	1.07258	8	57.65	1.42045	8	135.04
K1107_HUMAN	Uncharacterized protein KIAA1107	155.6	5.8	29	1	0.6	734.01	0.298701	3	8.62	0.274194	3	2.28	0.857955	3	7.68
K1C10_HUMAN	Keratin, type I cytoskeletal 10	58.8	5.0	1995.4	30	49.3	71.22	1.18182	100	53.36	1.59677	101	66.75	1.30682	106	47.57
K1C13_HUMAN	Keratin, type I cytoskeletal 13	49.6	4.8	1254.8	24	41.9	8.21	0.272727	114	122.17	0.354839	111	87.67	1.15909	110	71.46
K1C14_HUMAN	Keratin, type I cytoskeletal 14	51.5	4.9	647.6	11	18.4	8.62	0.714286	49	98.39	0.943548	49	122.96	1.31818	49	95.04
K1C16_HUMAN	Keratin, type I cytoskeletal 16	51.2	4.8	596.2	10	15.9	8.75	0.649351	49	95.96	0.887097	49	115.19	1.35795	49	94.04
K1C18_HUMAN	Keratin, type I cytoskeletal 18	48.0	5.2	702	14	38.4	78.30	1.09091	51	51.05	1.8629	53	51.75	1.42614	54	70.57
K1C19_HUMAN	Keratin, type I cytoskeletal 19	44.1	4.9	1397.1	25	59.8	11.44	1.14286	114	56.3	1.79032	119	91.81	1.46591	120	79.7
K1C20_HUMAN	Keratin, type I cytoskeletal 20	48.5	5.4	949.2	18	39.4	11.37	1.45455	100	85.96	1.84677	97	71.67	1.07386	99	62.71
K1C23_HUMAN	Keratin, type I cytoskeletal 23	48.1	6.1	117.6	2	4.0	15.02	0.311688	4	166.88	0.725806	4	179.72	2.11364	4	23.56
K1C9_HUMAN	Keratin, type I cytoskeletal 9	62.0	5.0	1410.8	23	49.1	8.94	1.63636	59	51.54	1.55645	59	55.42	0.875	59	31.97
K22E_HUMAN	Keratin, type II cytoskeletal 2 epidermal	65.4	8.9	2055.3	31	53.8	8.96	0.727273	111	92.73	0.854839	111	86.57	1.08523	110	52.6
K2C1_HUMAN	Keratin, type II cytoskeletal 1	66.0	8.8	2648.2	42	50.5	9.67	0.857143	172	45.23	1.15323	173	47.72	1.1875	178	40.67
K2C4_HUMAN	Keratin, type II cytoskeletal 4	57.2	6.2	1135.2	22	38.8	9.10	0.246753	78	99.63	0.354839	76	76.89	1.23864	78	92.34
K2C5_HUMAN	Keratin, type II cytoskeletal 5	62.3	8.6	1160.7	25	28.6	8.24	0.350649	99	82.97	0.524194	97	58.45	1.23295	98	59.95
K2C6A_HUMAN	Keratin, type II cytoskeletal 6A	60.0	8.9	1416.8	28	40.1	8.19	0.298701	115	79.1	0.395161	115	67.58	1.16477	115	51.12
K2C7_HUMAN	Keratin, type II cytoskeletal 7	51.4	5.3	946.4	19	33.3	8.79	0.714286	65	110.69	2.01613	65	144.16	2.55114	67	76.83
K2C78_HUMAN	Keratin, type II cytoskeletal 78	56.8	5.7	95.4	3	4.2	7.23	0.428571	11	39.81	0.693548	11	34.33	1.48295	11	59.18
K2C8_HUMAN	Keratin, type II cytoskeletal 8	53.7	5.4	1911.4	36	53.4	10.07	0.883117	160	79.31	1.6129	163	101.11	1.71023	171	69.7
K2C80_HUMAN	Keratin, type II cytoskeletal 80	50.5	5.4	200.7	1	2.4	9.15	0.246753	4	24.58	1.71774	4	3.56	6.38636	4	24.04
K6PL_HUMAN	6-phosphofructokinase, liver type	85.0	7.9	64.4	1	2.2	15.07	1.5974	3	15.41	1.60484	3	3.24	0.920455	3	18.7
KAD1_HUMAN	Adenylate kinase isoenzyme 1	21.6	9.4	97.1	2	12.4	14.61	0.649351	5	16.1	1.19355	5	13.43	1.68182	5	14.58
KAD7_HUMAN	Adenylate kinase 7	82.6	4.5	32.4	1	1.0	15.80	3.19481	2	18.65	3.14516	2	12.81	0.903409	2	5.73
KAIN_HUMAN	Kallistatin	48.5	8.0	441.1	9	26.7	18.20	0.753247	36	57.68	0.935484	39	51.35	1.11364	36	30.99
KAPCA_HUMAN	cAMP-dependent protein kinase catalytic subunit alpha	40.6	9.4	104.8	2	5.1	578.03	0.493506	4	106.21	0.604839	4	18.45	1.125	4	79.67
KAT2B_HUMAN	Histone acetyltransferase KAT2B	93.0	9.8	64.5	1	1.2	640.28	2.15584	2	40.02	5.12903	2	33.05	2.18182	2	6.35
KAT6B_HUMAN	Histone acetyltransferase KAT6B	231.2	5.6	56.5	2	0.6	1137.59	1.25974	3	67.99	0.354839	3	93.81	0.255682	3	35.12
KBTB4_HUMAN	Kelch repeat and BTB domain-containing protein 4	58.1	5.3	27.6	1	1.5	914.80	1.90909	4	33.59	19.7419	4	26.85	9.46591	4	18.8
KCMA1_HUMAN	Calcium-activated potassium channel subunit alpha-1	137.5	6.7	107.8	2	1.8	493.28	1.33766	3	56.69	0.806452	3	51.72	0.551136	3	5.35
KCNA5_HUMAN	Potassium voltage-gated channel subfamily A member 5	67.2	5.6	31.9	1	1.1	982.34	1.88312	4	7.17	1.5	4	13.05	0.727273	4	10.18
KCNKI_HUMAN	Potassium channel subfamily K member 18	43.6	6.7	27.8	1	3.6	33.61	1.63636	2	4.12	0.758065	2	18.56	0.426136	2	22.81
KCRB_HUMAN	Creatine kinase B-type	42.6	5.2	567.8	12	41.7	9.02	0.311688	40	74.08	0.379032	40	62.91	1.08523	40	38.78
KCRU_HUMAN	Creatine kinase U-type, mitochondrial	47.0	9.4	220.7	4	9.1	12.55	0.831169	10	162.34	0.887097	10	106.04	0.982955	10	76.93
KCY_HUMAN	UMP-CMP kinase	22.2	5.3	238.8	5	33.2	13.49	0.636364	15	32.68	0.580645	15	20.3	0.829545	15	33.03
KDM1A_HUMAN	Lysine-specific histone demethylase 1A	92.8	6.1	62.2	2	1.5	33.06	1	5	5.52	1.3871	5	39.41	1.26136	5	44.86
KDM5A_HUMAN	Lysine-specific demethylase 5A	192.0	6.1	209.7	7	2.3	239.78	1.50649	38	68.37	0.717742	36	32.83	0.448864	37	64.77
KHK_HUMAN	Ketohexokinase	32.7	5.6	46	1	4.0	20.10	0.545455	3	29.36	0.653226	3	10.53	1.10227	3	19.44
KIF11_HUMAN	Kinesin-like protein KIF11	119.1	5.4	26	1	0.6	47.50	2.03896	2	0.07	1.76613	2	4.07	0.795455	2	3.99
KIF17_HUMAN	Kinesin-like protein KIF17	115.0	5.3	32.9	1	0.9	14.91	1.88312	2	2.2	4.37903	2	22.71	2.11932	2	20.43
KIFA3_HUMAN	Kinesin-associated protein 3	91.1	4.8	78.7	3	2.8	566.04	4.11688	3	53.27	2.66129	3	42.63	0.590909	3	109.83
KIRR1_HUMAN	Kin of IRRE-like protein 1	83.5	5.4	97.9	2	2.6	31.03	0.584416	3	44.03	0.693548	3	39.56	1.09091	3	4.13
KLHL1_HUMAN	Kelch-like protein 1	82.6	5.9	28.5	1	0.9	1127.06	1.71429	7	36.49	0.66129	7	37.32	0.352273	7	14.11
KLK1_HUMAN	Kallikrein-1	28.9	4.5	458.5	8	29.8	8.94	0.233766	43	115.04	0.75	43	87	3.02841	43	57.9
KLK3_HUMAN	Prostate-specific antigen	28.7	9.0	470.8	9	36.8	11.04	0.207792	56	123.38	0.580645	58	35.34	2.76705	55	76.5
KLKB1_HUMAN	Plasma kallikrein	71.3	9.7	138	2	3.9	11.73	0.753247	4	21.13	2.45968	4	74.59	2.98864	4	100.22
KNG1_HUMAN	Kininogen-1	71.9	6.4	2423	42	29.3	9.90	0.571429	373	78.34	0.903226	379	86.58	1.43182	370	54.75
KPYM_HUMAN	Pyruvate kinase isozymes M1/M2	57.9	9.0	932.8	21	45.2	9.48	0.727273	52	52.18	1.01613	50	36.44	1.26705	52	46.45
KRT85_HUMAN	Keratin, type II cuticular Hb5	55.8	6.3	183.8	4	3.7	43.20	1.02597	25	90.34	0.798387	25	27.84	0.710227	25	69.72
KTN1_HUMAN	Kinectin	156.2	5.4	28.9	1	1.5	71.91	2.16883	2	21.13	4.12097	2	1.52	1.74432	2	19.57
KV101_HUMAN	Ig kappa chain V-I region AG	12.0	5.6	344	5	41.7	61.42	1.32468	70	30.27	1.89516	70	31.29	1.34659	68	24.67
KV102_HUMAN	Ig kappa chain V-I region AU	11.9	5.0	234.6	3	31.5	13.94	1.2987	71	26.26	1.85484	71	39.53	1.3125	71	29.19
KV103_HUMAN	Ig kappa chain V-I region Bi	12.0	5.1	37.9	1	11.1	501.06	1.03896	4	11.34	1.23387	4	1.72	1.07955	4	9.82
KV104_HUMAN	Ig kappa chain V-I region CAR	11.7	0.0	269.6	4	38.3	150.24	1.33766	85	27.17	1.70161	85	30.6	1.19886	85	20.24
KV105_HUMAN	Ig kappa chain V-I region DEE	11.7	16.4	729	11	50.9	57.49	1.31169	89	29.85	1.87097	90	37.72	1.29545	90	23.72
KV106_HUMAN	Ig kappa chain V-I region EU	11.8	9.2	346.8	6	48.1	182.00	1.35065	72	28.06	1.67742	73	43.54	1.13636	71	30.08
KV107_HUMAN	Ig kappa chain V-I region Gal	11.8	9.6	274	5	50.9	105.21	1.33766	70	28.39	1.98387	70	33.51	1.35227	70	22.16
KV108_HUMAN	Ig kappa chain V-I region Hau	11.7	9.6	228.4	3	33.3	97.00	1.31169	65	26.07	1.89516	65	33.8	1.34659	64	22.9
KV109_HUMAN	Ig kappa chain V-I region HK101 (Fragment)	12.8	9.5	163.7	3	29.9	135.05	1.28571	16	28.9	1.78226	17	28.95	1.46023	16	22.89
KV110_HUMAN	Ig kappa chain V-I region HK102 (Fragment)	12.8	6.9	126.3	2	17.9	127.75	1.28571	36	34.63	1.33065	39	32.38	0.971591	37	28.24
KV111_HUMAN	Ig kappa chain V-I region Ka	11.9	9.5	43.2	1	14.8	6.68	1.22078	7	17.35	1.44355	7	13.9	1.08523	7	27.16
KV112_HUMAN	Ig kappa chain V-I region Kue	12.1	9.4	117.8	3	13.9	13.23	1.20779	6	82.97	1.91935	6	68.72	1.46023	6	35.5
KV113_HUMAN	Ig kappa chain V-I region Lay	11.8	9.2	193.8	4	31.5	8.49	1.45455	25	30.68	2.02419	24	31.99	1.22159	25	36.64
KV114_HUMAN	Ig kappa chain V-I region OU	11.8	10.6	292.4	5	34.3	120.17	1.32468	66	25.85	1.95968	66	30.26	1.35795	66	22.13
KV116_HUMAN	Ig kappa chain V-I region Roy	11.8	5.0	340.5	7	53.7	13.85	1.31169	78	29.46	1.99194	79	31.01	1.375	77	28.64
KV118_HUMAN	Ig kappa chain V-I region WEA	11.8	9.6	263.5	4	31.5	60.05	1.32468	73	26.56	2.08065	73	36.38	1.4375	73	25.77
KV119_HUMAN	Ig kappa chain V-I region Wes	11.6	7.8	227.5	3	31.5	14.00	1.66234	18	31.85	2.30645	17	25.33	1.34659	18	17.53
KV120_HUMAN	Ig kappa chain V-I region Mev	11.9	7.0	296.9	4	33.0	11.22	1.20779	30	24.67	1.83871	30	32.15	1.38636	30	29.1
KV122_HUMAN	Ig kappa chain V-I region BAN	11.8	9.4	80.1	1	16.7	123.58	0.948052	15	39.08	1.3629	15	34.17	1.32386	15	54.89
KV123_HUMAN	Ig kappa chain V-I region Walker	14.1	0.0	136.2	2	28.7	202.83	1.07792	29	45.97	1.71774	29	43.1	1.48864	28	18.69
KV124_HUMAN	Ig kappa chain V-I region Daudi	14.2	10.0	71.9	2	28.7	426.65	1.84416	3	60.19	3.20968	3	45.62	1.59659	3	14.81
KV202_HUMAN	Ig kappa chain V-II region FR	12.6	9.1	81.5	2	37.2	156.34	1.37662	8	11	1.54032	8	44.67	1.02273	8	34.44
KV204_HUMAN	Ig kappa chain V-II region TEW	12.3	5.6	356.6	4	35.4	15.74	1.22078	75	42.59	1.64516	75	46.34	1.19318	81	34.25
KV205_HUMAN	Ig kappa chain V-II region GM607 (Fragment)	12.7	7.6	375.8	5	35.9	18.49	1.20779	77	39.41	1.53226	78	53.07	1.14773	78	42.15
KV206_HUMAN	Ig kappa chain V-II region RPMI 6410	14.7	10.0	389	5	51.1	17.22	1.14286	87	39.33	1.46774	89	50.95	1.17614	88	37.39
KV301_HUMAN	Ig kappa chain V-III region B6	11.6	0.0	502.3	8	58.3	13.69	1.16883	99	41.19	1.44355	100	53.34	1.14773	101	30.42
KV302_HUMAN	Ig kappa chain V-III region SIE	11.8	9.5	675.4	10	66.1	13.00	1.28571	193	30.47	1.55645	198	43.92	1.18182	195	30.92
KV303_HUMAN	Ig kappa chain V-III region NG9 (Fragment)	10.7	7.1	331.7	5	54.0	9.03	1.36364	50	25.14	1.55645	55	33.91	1.125	53	29.71
KV304_HUMAN	Ig kappa chain V-III region Ti	11.8	9.6	556	9	66.1	12.78	1.25974	177	32.23	1.66935	179	43.22	1.27273	177	29.16
KV306_HUMAN	Ig kappa chain V-III region POM	11.9	9.6	159.9	4	24.8	6.12	1.88312	19	24.35	1.83871	19	42.75	0.892045	19	27.95
KV307_HUMAN	Ig kappa chain V-III region GOL	11.8	0.0	551.9	9	66.1	14.04	1.32468	154	39.56	1.62903	155	42.22	1.17045	155	34.82
KV309_HUMAN	Ig kappa chain V-III region VG (Fragment)	12.6	4.7	153.2	3	26.1	8.48	1.5974	25	18.89	1.46774	26	12.33	0.840909	25	22.75
KV310_HUMAN	Ig kappa chain V-III region VH (Fragment)	12.7	5.6	181.6	5	48.3	4.96	1.50649	24	33.82	1.78226	25	46.36	1.15341	26	33.41
KV311_HUMAN	Ig kappa chain V-III region IARC/BL41	14.1	7.1	198.7	2	24.2	14.91	1.12987	41	36.51	2.23387	40	55.64	1.74432	41	35.74
KV312_HUMAN	Ig kappa chain V-III region HAH	14.1	9.1	554.2	8	50.4	13.02	1.25974	143	35.53	1.54032	147	44.37	1.19318	143	31.28
KV401_HUMAN	Ig kappa chain V-IV region (Fragment)	13.4	4.9	413.8	11	34.7	8.90	1.18182	94	33.44	1.85484	91	42.2	1.42614	94	41.08
KV402_HUMAN	Ig kappa chain V-IV region Len	12.6	9.0	462.6	10	52.6	8.86	1.20779	124	36.16	1.73387	120	37.66	1.26136	131	40.82
KV405_HUMAN	Ig kappa chain V-IV region STH (Fragment)	12.1	9.1	175.2	4	35.8	14.07	1.2987	21	22.09	1.85484	21	38.77	1.30682	21	35.95
LAC2_HUMAN	Ig lambda-2 chain C regions	11.3	7.7	1629.4	23	96.2	12.37	1.35065	481	57.4	1.31452	490	70.47	0.897727	494	32.71
LAC3_HUMAN	Ig lambda-3 chain C regions	11.2	7.7	1482.1	21	93.4	12.23	1.36364	472	55.45	1.33065	480	69.07	0.903409	484	32.37
LAC7_HUMAN	Ig lambda-7 chain C region	11.3	9.5	1074.6	17	82.1	10.95	1.33766	339	49.91	1.33065	344	49.34	0.892045	347	26.65
LACB2_HUMAN	Beta-lactamase-like protein 2	32.8	6.3	71.6	1	6.9	20.42	1	2	8.37	1.1129	2	16.36	1.02273	2	7.91
LAIR1_HUMAN	Leukocyte-associated immunoglobulin-like receptor 1	31.4	5.3	107.8	2	9.1	8.87	0.935065	5	13.49	1.41935	5	21.19	1.38636	5	16.6
LAMA4_HUMAN	Laminin subunit alpha-4	202.4	5.9	56.5	2	0.4	20.51	1.45455	2	11.96	1.47581	2	12.8	0.926136	2	0.83
LAMB2_HUMAN	Laminin subunit beta-2	195.9	6.1	42.4	1	0.7	7.20	0.935065	4	16.01	1	4	8.32	0.988636	4	19.51
LAMC1_HUMAN	Laminin subunit gamma-1	177.5	4.9	86.7	2	1.1	28.89	0.636364	4	172.12	0.556452	4	15.45	0.801136	4	151.61
LAMP1_HUMAN	Lysosome-associated membrane glycoprotein 1	44.9	9.9	136.6	3	7.7	13.55	0.831169	13	35.21	0.766129	13	28.98	0.840909	13	36.57
LAT2_HUMAN	Large neutral amino acids transporter small subunit 2	58.3	5.6	27.7	1	1.9	14.06	1.50649	2	9.68	0.540323	2	2.1	0.323864	2	7.57
LAYN_HUMAN	Layilin	43.1	4.7	64	2	6.8	18.28	0.805195	3	13.25	0.75	3	42.14	0.852273	3	28.17
LBP_HUMAN	Lipopolysaccharide-binding protein	53.3	6.2	392.5	7	18.9	10.30	1.44156	31	37.38	2.58065	32	56.05	1.61932	34	80.47
LCAT_HUMAN	Phosphatidylcholine-sterol acyltransferase	49.5	5.7	583.8	10	31.4	7.99	1.18182	32	29.13	0.822581	31	24.38	0.625	33	12.37
LCN1_HUMAN	Lipocalin-1	19.2	5.3	231.3	5	35.2	15.50	1.53247	14	60.39	1.5	14	45.89	0.903409	17	14.64
LDHA_HUMAN	L-lactate dehydrogenase A chain	36.7	9.3	773.3	13	38.9	12.38	0.857143	75	45.54	1.21774	81	54.3	1.30682	76	61.43
LDHB_HUMAN	L-lactate dehydrogenase B chain	36.6	5.7	885.5	15	40.7	9.17	0.558442	55	49.1	0.870968	55	45.83	1.44318	53	42.73
LEG1_HUMAN	Galectin-1	14.7	5.2	85.8	2	11.9	11.54	1.48052	7	35.74	1.91129	7	10.49	1.18182	7	25.62
LEG3_HUMAN	Galectin-3	26.1	9.1	361	8	26.0	11.82	0.662338	34	41.06	0.822581	33	24.47	1.16477	34	39.58
LEG4_HUMAN	Galectin-4	35.9	9.7	618.6	12	38.1	15.30	1.20779	46	61.39	1.15323	46	90.33	0.909091	45	56.78
LEG9_HUMAN	Galectin-9	39.5	10.2	177.5	3	12.1	221.10	0.441558	10	27.71	0.419355	10	34.89	0.892045	10	34.34
LFA3_HUMAN	Lymphocyte function-associated antigen 3	28.1	6.3	38.6	1	4.0	13.10	0.584416	4	7.46	0.798387	4	11.43	1.23864	4	5.11
LFG3_HUMAN	Protein lifeguard 3	34.6	8.6	58.8	1	4.5	7.99	0.571429	2	0.41	0.629032	2	0.6	1	2	1
LG3BP_HUMAN	Galectin-3-binding protein	65.3	5.0	1434.6	27	31.5	11.25	0.363636	176	57.97	0.629032	180	30.97	1.5625	175	47.87
LGUL_HUMAN	Lactoylglutathione lyase	20.8	5.0	161.3	3	24.5	13.40	0.376623	12	32.98	0.556452	12	29.31	1.375	12	22.32
LIPB2_HUMAN	Liprin-beta-2	98.5	5.9	79.3	3	3.9	297.86	1.32468	3	61.65	0.701613	3	68.93	0.482955	3	5.9
LIPK_HUMAN	Lipase member K	45.5	9.0	64.9	1	2.5	546.99	1.84416	4	38.03	0.758065	4	58.64	0.380682	4	77.12
LIRA5_HUMAN	Leukocyte immunoglobulin-like receptor subfamily A member 5	32.7	6.6	116.6	3	17.4	15.50	0.558442	8	52.57	0.854839	9	26.26	1.39205	8	44.99
LKHA4_HUMAN	Leukotriene A-4 hydrolase	69.2	5.8	347.1	8	17.0	14.53	0.74026	17	59.83	0.725806	17	68.63	0.903409	17	27.45
LMAN2_HUMAN	Vesicular integral-membrane protein VIP36	40.2	6.5	1937.7	37	56.5	13.28	0.532468	220	52.08	0.903226	222	72.29	1.51136	218	76.08
LMNA_HUMAN	Prelamin-A/C	74.1	6.6	521.6	10	16.1	10.71	1.15584	29	67.37	1.39516	28	48.95	1.17045	29	60.72
LMNB1_HUMAN	Lamin-B1	66.4	5.0	26.8	1	1.0	11.36	0.883117	2	2.48	1.27419	2	22.19	1.32386	2	24.77
LONF3_HUMAN	LON peptidase N-terminal domain and RING finger protein 3	84.4	7.3	29.6	1	1.3	10.94	1.85714	2	1.77	1.08871	2	11.81	0.534091	2	13.6
LPHN1_HUMAN	Latrophilin-1	162.6	6.2	240.1	5	3.3	5.01	0.285714	17	102.19	0.41129	16	33.32	1.44318	17	75.71
LPHN2_HUMAN	Latrophilin-2	163.2	6.0	35.4	1	0.7	6.49	0.324675	2	8.17	0.612903	2	1.34	1.6875	2	9.52
LPPL_HUMAN	Eosinophil lysophospholipase	16.4	7.7	244	5	39.4	15.34	2.09091	31	57.14	1.66129	31	62.46	0.738636	32	22.19
LRC15_HUMAN	Leucine-rich repeat-containing protein 15	64.3	6.3	30.9	1	1.5	6.63	0.818182	2	17.03	0.66129	2	9.51	0.744318	2	7.43
LRC19_HUMAN	Leucine-rich repeat-containing protein 19	42.3	4.9	72.2	1	4.3	13.46	0.922078	4	10.73	0.943548	4	13.14	0.931818	4	3.38
LRC25_HUMAN	Leucine-rich repeat-containing protein 25	33.2	4.7	46.4	1	3.9	10.66	0.545455	2	4.83	0.790323	2	14.99	1.30682	2	10.11
LRP2_HUMAN	Low-density lipoprotein receptor-related protein 2	521.6	4.8	3415	66	16.2	11.56	0.532468	282	51.22	0.725806	288	41.41	1.25568	279	46.69
LRRC7_HUMAN	Leucine-rich repeat-containing protein 7	172.5	6.4	54.4	1	0.4	10.37	0.545455	2	47.09	3.85484	2	29.99	6.45455	2	15.5
LUM_HUMAN	Lumican	38.4	6.2	951.4	17	38.5	12.58	1.66234	142	31.11	1.53226	142	36.82	0.846591	141	23.17
LUZP1_HUMAN	Leucine zipper protein 1	120.2	9.4	72.2	2	1.2	38.22	2.06494	4	17.97	2.23387	4	46.41	0.994318	4	42.68
LV001_HUMAN	Ig lambda chain V region 4A	12.4	7.5	129.8	2	15.4	13.79	1.53247	9	15.24	1.6129	9	13.76	0.960227	9	5.25
LV102_HUMAN	Ig lambda chain V-I region HA	11.9	9.7	215.1	4	25.9	17.48	1.77922	22	55.03	1.66129	22	57.99	0.835227	21	17.36
LV103_HUMAN	Ig lambda chain V-I region NEW	11.4	9.1	108.3	3	26.1	24.53	1.80519	16	40.78	2.37097	16	29.14	1.13068	15	14.38
LV104_HUMAN	Ig lambda chain V-I region NIG-64	11.4	4.5	92	2	14.4	13.31	1.77922	16	18.94	2.1129	16	12.14	1.07955	16	21.09
LV105_HUMAN	Ig lambda chain V-I region NEWM	10.9	10.1	154.6	4	25.2	20.44	0.818182	11	74.11	1.46774	11	41.76	1.63068	11	44.85
LV106_HUMAN	Ig lambda chain V-I region WAH	11.7	6.9	244	5	26.6	11.83	1.8961	25	52.52	1.60484	25	67.98	0.772727	25	37.9
LV204_HUMAN	Ig lambda chain V-II region TRO	11.6	9.4	64.6	1	7.2	4.37	3.53247	3	13.25	1.91129	3	10.89	0.494318	3	2.55
LV205_HUMAN	Ig lambda chain V-II region BUR	11.5	8.9	118.6	2	10.1	14.84	1.45455	8	18.25	1.14516	9	63.7	0.880682	9	10.02
LV207_HUMAN	Ig lambda chain V-II region BO	11.8	5.6	27	1	9.9	7.25	1.85714	2	8.21	1.06452	2	11.03	0.522727	2	2.8
LV209_HUMAN	Ig lambda chain V-II region WIN	11.7	9.3	52	1	7.2	31.09	1.61039	10	9.1	2.04839	10	11.09	1.15909	10	11.81
LV211_HUMAN	Ig lambda chain V-II region NIG-84	11.6	7.5	33.8	1	14.3	9.63	1.2987	5	57.18	1.87097	5	17.99	1.31818	5	45.63
LV301_HUMAN	Ig lambda chain V-III region SH	11.4	6.1	34.9	1	9.3	5.54	1.80519	7	30.04	1.28226	7	18.37	0.647727	7	38.21
LV302_HUMAN	Ig lambda chain V-III region LOI	11.9	4.8	373	6	37.8	8.86	1.64935	26	31.56	1.83065	25	35.88	0.971591	26	26.82
LV403_HUMAN	Ig lambda chain V-IV region Hil	11.5	6.9	97.1	2	17.8	150.34	0.792208	11	67.6	0.629032	10	87.61	0.681818	10	26.51
LV501_HUMAN	Ig lambda chain V-V region DEL	11.3	5.0	76.6	1	14.8	6.27	1.84416	6	38.57	2.30645	6	39.11	1.14205	6	27.5
LV601_HUMAN	Ig lambda chain V-VI region AR	11.9	4.5	83.3	2	14.3	66.66	0.974026	2	15.04	0.419355	3	84	0.636364	2	45.13
LV604_HUMAN	Ig lambda chain V-VI region WLT	12.0	4.5	114.6	1	18.0	121.52	0.831169	28	58.39	1.01613	28	58.81	1.11364	28	31.81
LY6H_HUMAN	Lymphocyte antigen 6H	14.7	7.9	131.3	2	12.1	271.41	1.49351	3	13.52	0.733871	3	26.37	0.448864	3	30.91
LY75_HUMAN	Lymphocyte antigen 75	198.2	6.2	87.7	2	1.3	426.76	0.779221	4	95.29	0.653226	4	41.95	0.767045	4	58.36
LYAG_HUMAN	Lysosomal alpha-glucosidase	105.3	5.6	2014.7	39	38.8	10.18	0.441558	219	75.97	0.362903	227	87.47	0.772727	214	55.41
LYNX1_HUMAN	Ly-6/neurotoxin-like protein 1	14.0	6.3	66.4	1	9.9	8.27	1.49351	4	16.29	2.54032	4	6.24	1.5625	4	10.68
LYPA1_HUMAN	Acyl-protein thioesterase 1	24.7	6.3	56.2	1	4.8	15.22	0.519481	2	0.39	0.669355	2	0.1	1.17614	2	0.29
LYPA2_HUMAN	Acyl-protein thioesterase 2	24.7	6.9	74.4	1	11.3	18.88	0.844156	2	6.32	0.508065	3	17.02	0.607955	2	0.29
LYSC_HUMAN	Lysozyme C	16.5	10.6	126.5	2	16.2	13.05	1.54545	21	39.7	1.07258	21	32.21	0.613636	22	32.11
LYSM1_HUMAN	LysM and putative peptidoglycan-binding domain-containing protein 1	25.0	9.3	60.1	2	12.3	224.85	0.805195	3	18.93	0.774194	3	73.34	0.875	3	56.52
LYST_HUMAN	Lysosomal-trafficking regulator	428.9	6.2	29.5	1	0.2	19.09	2.61039	2	8.77	2.07258	2	11.67	0.727273	2	2.87
LYVE1_HUMAN	Lymphatic vessel endothelial hyaluronic acid receptor 1	35.2	9.5	406.3	8	14.6	13.63	1.49351	31	31.03	2.00806	31	47.87	1.22727	31	34.62
M4K4_HUMAN	Mitogen-activated protein kinase kinase kinase kinase 4	142.0	7.2	68.7	2	1.5	658.19	1.44156	5	34.47	0.967742	5	35.28	0.607955	5	68.22
MA1A1_HUMAN	Mannosyl-oligosaccharide 1,2-alpha-mannosidase IA	72.9	6.0	515.2	10	16.1	11.37	0.532468	41	51.75	0.814516	39	30.23	1.39205	41	50.69
MA2A1_HUMAN	Alpha-mannosidase 2	131.1	7.5	84.2	2	2.2	18.34	1.06494	8	35.2	0.798387	8	46.72	0.681818	8	14.6
MA2B1_HUMAN	Lysosomal alpha-mannosidase	113.7	6.9	228.2	5	7.1	16.62	0.948052	8	34.35	1.5	10	31.23	1.33523	8	33.51
MA2B2_HUMAN	Epididymis-specific alpha-mannosidase	113.9	6.8	808.9	14	18.9	15.01	0.558442	47	34.21	0.645161	48	46.79	1.00568	49	38.75
MA7D1_HUMAN	MAP7 domain-containing protein 1	92.8	10.8	57.4	2	1.2	6.54	2.46753	3	69.41	6.90323	3	11.09	2.56818	3	68.86
MA7D2_HUMAN	MAP7 domain-containing protein 2	81.9	9.6	59.9	2	2.7	49.60	2.53247	6	32.7	2.48387	6	82.66	0.897727	6	47.26
MAAT1_HUMAN	Protein MAATS1	71.0	7.9	58.1	2	2.7	11.23	0.805195	11	44.64	10.8226	11	125.12	16.8409	10	56.96
MACF1_HUMAN	Microtubule-actin cross-linking factor 1, isoforms 1/2/3/5	837.8	5.2	62.9	2	0.1	14.72	0.948052	9	46.77	4.64516	9	27.73	4.47727	9	70.13
MADCA_HUMAN	Mucosal addressin cell adhesion molecule 1	40.1	4.9	114.7	2	6.3	14.49	0.675325	6	19.34	0.645161	6	17.86	0.875	6	25.62
MAGE1_HUMAN	Melanoma-associated antigen E1	103.2	5.1	25.8	1	0.7	964.06	1.07792	2	15.43	0.387097	2	33.57	0.329545	2	17.48
MAGE2_HUMAN	Melanoma-associated antigen E2	60.3	4.9	25.8	1	1.3	1009.17	0.376623	2	92.81	3.90323	2	7.02	9.34091	2	82.14
MANBA_HUMAN	Beta-mannosidase	100.8	5.2	291.6	6	7.3	8.64	0.597403	17	29.92	0.790323	17	9.19	1.22159	17	28.19
MARCS_HUMAN	Myristoylated alanine-rich C-kinase substrate	31.5	4.3	52.6	1	5.7	6.82	0.818182	2	9.45	0.443548	2	4.03	0.494318	2	5.4
MASP2_HUMAN	Mannan-binding lectin serine protease 2	75.7	5.3	673.8	12	13.0	9.55	0.480519	152	67.17	0.604839	152	107.66	1.125	152	70.24
MATN4_HUMAN	Matrilin-4	68.4	5.7	198.6	2	4.8	18.15	0.428571	42	56.67	0.83871	50	32.73	1.72727	40	57.1
MCCA_HUMAN	Methylcrotonoyl-CoA carboxylase subunit alpha, mitochondrial	80.4	8.5	28.7	1	1.1	830.32	0.961039	2	0.57	0.548387	2	4.5	0.522727	2	3.93
MCCB_HUMAN	Methylcrotonoyl-CoA carboxylase beta chain, mitochondrial	61.3	8.5	25.9	1	2.0	509.07	1.53247	2	7.93	0.556452	2	7.6	0.335227	2	0.33
MCM3A_HUMAN	80 kDa MCM3-associated protein	218.3	6.0	30.1	1	0.5	837.46	1.96104	3	1.37	0.725806	3	4.09	0.340909	3	4.09
MCM8_HUMAN	DNA helicase MCM8	93.6	8.7	85.9	3	1.9	455.76	1.77922	5	282.2	0.322581	5	244.88	0.164773	5	41.65
MCTS1_HUMAN	Malignant T-cell-amplified sequence 1	20.5	9.7	42	1	11.0	11.65	1.55844	2	4.21	1.25	2	27.42	0.732955	2	31.9
MDHC_HUMAN	Malate dehydrogenase, cytoplasmic	36.4	7.7	212.3	5	21.0	125.17	0.506494	12	28.47	0.427419	12	31.47	0.772727	12	30.36
MDHM_HUMAN	Malate dehydrogenase, mitochondrial	35.5	9.8	273.8	4	18.3	14.73	1.05195	17	41.31	1.66935	17	31.3	1.45455	17	29.06
MDR1_HUMAN	Multidrug resistance protein 1	141.4	9.6	96.9	2	1.2	5.53	0.441558	3	23.77	0.540323	3	4.96	1.125	3	25.86
MED1_HUMAN	Mediator of RNA polymerase II transcription subunit 1	168.4	9.5	54.4	2	0.8	498.47	1.42857	4	52.08	1.78226	4	139.15	1.13636	4	59.6
MEGF8_HUMAN	Multiple epidermal growth factor-like domains protein 8	302.9	6.5	270.4	5	3.5	11.24	0.454545	15	29.04	0.580645	15	22.92	1.19318	15	43.8
MEP1A_HUMAN	Meprin A subunit alpha	84.4	5.3	348.6	7	12.6	13.95	1.06494	22	55.63	2.45968	22	71.9	1.98295	23	61.23
METK2_HUMAN	S-adenosylmethionine synthase isoform type-2	43.6	6.0	90.4	2	3.5	12.04	0.142857	5	91.27	0.298387	5	52.78	1.85227	5	41.27
MFAP4_HUMAN	Microfibril-associated glycoprotein 4	28.6	5.3	112.6	2	9.4	14.12	0.714286	8	51.57	0.572581	8	20.58	0.732955	8	55.04
MFAP5_HUMAN	Microfibrillar-associated protein 5	19.6	5.6	28.9	1	3.5	21.33	5.83117	2	20.21	2.27419	2	8.36	0.357955	2	11.7
MGA_HUMAN	Maltase-glucoamylase, intestinal	209.7	5.2	2161.3	47	26.7	12.81	0.519481	219	51.65	0.580645	215	60.61	0.994318	213	49.3
MGAP_HUMAN	MAX gene-associated protein	331.6	6.3	80.4	2	0.2	444.39	1.44156	5	58.69	0.830645	5	40.55	0.528409	5	17.38
MGLL_HUMAN	Monoglyceride lipase	33.2	6.5	25.4	1	2.3	1061.36	3.96104	4	6.17	1.97581	4	4.67	0.454545	4	2.02
MGST3_HUMAN	Microsomal glutathione S-transferase 3	16.5	10.1	65.5	1	8.6	6.01	0.246753	3	5.02	0.629032	3	32.93	2.3125	3	35.03
MICA2_HUMAN	Protein-methionine sulfoxide oxidase MICAL2	126.6	9.7	56.1	1	1.0	710.91	1.16883	2	0.22	3.64516	2	3.35	2.86364	2	3.56
MICA3_HUMAN	Protein-methionine sulfoxide oxidase MICAL3	224.2	5.3	52.8	1	0.3	1125.79	0.779221	3	2.23	0.395161	3	2.17	0.465909	3	0.07
MIEN1_HUMAN	Migration and invasion enhancer 1	12.4	4.2	179.3	4	32.2	285.46	0.350649	12	49.69	0.741935	12	26.55	1.96591	12	44.54
MIME_HUMAN	Mimecan	33.9	5.3	108	2	8.4	10.94	1.36364	11	63.82	3.20161	11	38.5	2.15341	11	49.8
MINP1_HUMAN	Multiple inositol polyphosphate phosphatase 1	55.0	8.9	74.4	2	3.3	6.67	0.766234	7	45.6	0.927419	7	41.66	1.10795	7	46.02
MITD1_HUMAN	MIT domain-containing protein 1	29.3	9.0	87.2	2	10.0	560.54	1.5974	4	45.83	1.45161	4	9.19	0.829545	4	51.8
MK04_HUMAN	Mitogen-activated protein kinase 4	65.9	5.1	32.9	1	1.4	14.93	0.402597	4	16.37	0.298387	4	32.13	0.664773	4	41.99
MK14_HUMAN	Mitogen-activated protein kinase 14	41.3	5.4	52.8	1	5.6	10.52	2.22078	3	16.35	0.604839	3	15.29	0.25	3	9.82
ML12B_HUMAN	Myosin regulatory light chain 12B	19.8	4.5	100.7	3	17.4	9.86	1.14286	8	27.89	1.37903	8	18.51	1.10227	8	34.77
MLEC_HUMAN	Malectin	32.2	5.2	119.2	3	9.9	12.13	0.987013	4	9.34	1.5	4	36.58	1.39773	4	28.42
MLH1_HUMAN	DNA mismatch repair protein Mlh1	84.5	5.4	40	1	1.2	77.30	0.727273	6	69.64	0.653226	6	13.68	0.823864	6	64.19
MLL2_HUMAN	Histone-lysine N-methyltransferase MLL2	593.0	5.3	54.2	2	0.3	969.57	1.71429	3	42.06	1.42742	3	29.53	0.755682	3	12.49
MMP1_HUMAN	Interstitial collagenase	54.0	6.5	100.8	2	5.1	14.09	0.714286	3	135.39	3.67742	3	224.7	3.58523	6	183.1
MMP20_HUMAN	Matrix metalloproteinase-20	54.4	9.4	27.2	1	1.9	13.51	0.584416	5	7.18	2.04032	5	11.57	3.1875	5	17.68
MMP7_HUMAN	Matrilysin	29.7	8.8	163.7	3	7.5	6.22	0.467532	9	71.63	1.93548	9	26.27	3.77841	9	97.46
MMP8_HUMAN	Neutrophil collagenase	53.4	6.4	204.1	4	12.8	18.36	1.96104	12	86.82	2.22581	12	63.41	1.03409	12	44.23
MMP9_HUMAN	Matrix metalloproteinase-9	78.4	5.6	436.9	9	16.1	8.88	3.1039	31	53.88	3.54839	32	47.62	1.10227	32	27.67
MMRN2_HUMAN	Multimerin-2	104.3	5.5	449.2	6	7.7	11.51	0.441558	34	30.04	0.66129	35	24.76	1.28977	36	44.76
MMSA_HUMAN	Methylmalonate-semialdehyde dehydrogenase [acylating], mitochondrial	57.8	9.5	30.4	1	0.9	10.05	0.246753	16	24.47	0.508065	16	17.23	1.77841	15	13.05
MOC2A_HUMAN	Molybdopterin synthase sulfur carrier subunit	9.7	4.5	51.8	1	12.5	7.58	1.05195	3	9.93	1.05645	3	9.47	0.920455	3	6.26
MOES_HUMAN	Moesin	67.8	6.0	1024.4	23	29.6	11.07	0.766234	83	49.08	0.846774	82	53.99	1.03977	82	43.08
MPCP_HUMAN	Phosphate carrier protein, mitochondrial	40.1	10.1	65.5	1	3.3	6.09	0.220779	4	7.59	0.629032	4	8.49	2.65341	4	14.48
MPP10_HUMAN	U3 small nucleolar ribonucleoprotein protein MPP10	78.8	4.6	55.2	2	2.1	61.72	1.03896	10	27.24	1.74194	10	16.96	1.52841	10	35.51
MPP2_HUMAN	MAGUK p55 subfamily member 2	64.5	6.3	29.3	1	1.2	976.94	0.480519	3	9.56	0.653226	3	11.38	1.25568	3	15.96
MPP8_HUMAN	M-phase phosphoprotein 8	97.1	5.7	40.7	1	0.7	7.28	1.81818	4	26.37	14.5403	4	16.74	7.33523	4	30.51
MRC2_HUMAN	C-type mannose receptor 2	166.6	5.5	74.4	1	0.9	12.29	0.766234	5	20.83	0.766129	5	23.07	0.920455	5	17.46
MRCKB_HUMAN	Serine/threonine-protein kinase MRCK beta	194.2	5.9	129.6	4	2.2	14.35	1.33766	7	106.22	4.37097	7	202.05	2.99432	7	139.99
MRO2B_HUMAN	Maestro heat-like repeat-containing protein family member 2B	180.7	5.9	25.9	1	0.5	2.63	0.935065	6	12.71	3.12903	6	21.59	3.05682	6	32.22
MROH7_HUMAN	Maestro heat-like repeat-containing protein family member 7	145.6	6.5	55.8	2	0.5	266.62	2.27273	14	10.09	0.564516	14	17.94	0.227273	14	16.62
MRRP1_HUMAN	Mitochondrial ribonuclease P protein 1	47.3	10.0	60	2	3.0	611.50	0.337662	5	149.83	1.15323	5	14.89	3.09091	5	121.35
MSH3_HUMAN	DNA mismatch repair protein Msh3	127.3	9.0	58.1	2	1.1	338.25	2.63636	10	11.69	1.41935	10	22.71	0.517045	9	4.63
MSH6_HUMAN	DNA mismatch repair protein Msh6	152.7	6.5	30.5	1	0.5	19.09	0.415584	6	26.5	1.89516	6	6.78	4.11932	6	24.61
MSLN_HUMAN	Mesothelin	68.9	6.0	498.1	10	17.5	12.97	1.74026	31	33.73	2.01613	31	33.16	1.02273	31	29.49
MSMB_HUMAN	Beta-microseminoprotein	12.9	5.2	71.6	2	5.3	9.96	0.220779	7	59.12	0.258065	7	68.29	1.07955	7	12.97
MST1L_HUMAN	Putative macrophage stimulating 1-like protein	79.6	9.6	35.3	1	2.1	22.41	0.779221	2	18.13	1.03226	2	2.74	1.21591	2	15.33
MTER2_HUMAN	mTERF domain-containing protein 2	43.9	4.5	29.8	1	1.8	790.65	2.97403	9	21.25	1.51613	9	17.78	0.465909	9	11
MTPN_HUMAN	Myotrophin	12.9	5.2	86.9	2	18.6	15.31	1.50649	8	26.29	1.91935	8	55.97	1.15909	8	30.24
MUC1_HUMAN	Mucin-1	122.0	7.0	238.1	5	4.0	183.34	0.649351	12	58.72	0.548387	12	39.92	0.767045	12	25.2
MUC13_HUMAN	Mucin-13	54.5	4.8	40.1	1	3.3	23.30	0.948052	2	56.23	1.15323	2	49.29	1.11364	2	5.78
MUC18_HUMAN	Cell surface glycoprotein MUC18	71.6	5.5	724.4	14	22.9	11.95	0.831169	49	51.72	0.846774	48	51.27	0.897727	47	50.62
MUC2_HUMAN	Mucin-2	540.0	5.4	534.5	14	2.5	10.11	1.16883	37	49.98	1.35484	36	71.39	1.07386	37	65.72
MUC5B_HUMAN	Mucin-5B	596.0	6.2	183.4	4	0.7	301.70	0.623377	14	111.58	0.508065	14	53.04	0.744318	14	144.99
MUC6_HUMAN	Mucin-6	256.9	7.5	404.5	9	4.5	153.55	1.49351	31	90.43	1.23387	31	59.21	0.727273	31	51.83
MXRA5_HUMAN	Matrix-remodeling-associated protein 5	312.0	9.3	100.3	3	1.2	311.73	0.636364	4	49.03	0.943548	4	95.99	1.34659	4	78.17
MXRA8_HUMAN	Matrix-remodeling-associated protein 8	49.1	6.8	530.4	11	25.8	13.68	0.376623	50	69.27	0.612903	50	33.68	1.47159	50	75.27
MY18B_HUMAN	Unconventional myosin-XVIIIb	285.0	6.5	83.9	3	0.9	147.99	1.01299	6	92.75	0.233871	6	149.54	0.210227	6	37.61
MYBB_HUMAN	Myb-related protein B	78.7	6.4	29.4	1	0.9	7.99	1.2987	4	13.79	0.741935	4	11.78	0.517045	4	3.81
MYCBP_HUMAN	C-Myc-binding protein	12.0	5.6	64.4	2	12.6	55.89	2.16883	10	31.86	0.895161	10	21.29	0.375	10	21.18
MYG_HUMAN	Myoglobin	17.2	7.9	385	7	49.4	15.91	5.93506	26	60.69	2.00806	26	59.3	0.3125	26	22.46
MYH10_HUMAN	Myosin-10	228.9	5.3	278.2	5	3.2	14.73	0.779221	17	33.58	0.943548	17	44.36	1.11932	17	57.31
MYH11_HUMAN	Myosin-11	227.2	5.3	288.7	7	3.9	9.91	1	16	20.62	1.1129	16	57.62	1.01705	16	59.14
MYH14_HUMAN	Myosin-14	227.7	5.4	158.2	4	1.8	12.11	1.11688	12	9.88	1.12903	12	32.79	0.926136	12	36.24
MYH3_HUMAN	Myosin-3	223.8	5.5	53.1	1	0.8	34.63	1.02597	2	2.48	0.403226	2	11.01	0.363636	2	8.51
MYH9_HUMAN	Myosin-9	226.4	5.4	1805.1	36	22.1	12.90	0.948052	99	56.87	1.14516	99	53.59	1.09091	102	50.97
MYL6_HUMAN	Myosin light polypeptide 6	16.9	4.4	144.8	3	24.5	6.58	0.974026	8	40.9	1.08065	8	43.17	1.01705	8	27.63
MYLK_HUMAN	Myosin light chain kinase, smooth muscle	210.6	5.8	36	1	0.6	16.59	2.12987	4	2.13	1.79032	4	11.13	0.772727	4	13.1
MYO15_HUMAN	Unconventional myosin-XV	395.0	9.8	30.5	1	0.6	5.09	1.09091	6	41.21	0.733871	6	11.44	0.613636	6	30.24
MYO1D_HUMAN	Unconventional myosin-Id	116.1	10.0	101.4	2	2.7	8.59	0.753247	4	29.45	0.556452	4	40.89	0.744318	5	33
MYO5A_HUMAN	Unconventional myosin-Va	215.3	9.4	84.3	2	0.7	9.21	3.80519	8	44.97	1.94355	8	13.46	0.465909	8	32.31
MYO5C_HUMAN	Unconventional myosin-Vc	202.7	8.4	105.1	4	2.5	591.45	0.883117	4	129.44	0.387097	4	219.81	0.403409	4	103.51
MYO7B_HUMAN	Unconventional myosin-VIIb	241.4	9.5	55.3	2	0.6	790.92	2.07792	2	2.22	1.22581	2	3.95	0.539773	2	6.17
MYOC_HUMAN	Myocilin	56.9	5.3	466.7	10	19.4	11.63	1.57143	34	25.11	2.28226	34	46.36	1.31818	35	34
MYOF_HUMAN	Myoferlin	234.6	5.8	62	2	0.8	672.98	0.714286	2	2.23	0.475806	2	48.39	0.602273	2	51.02
MYOM2_HUMAN	Myomesin-2	164.8	5.8	32.6	1	0.8	733.09	3.07792	2	37.48	1.12903	2	7.82	0.335227	2	29.03
MYOZ1_HUMAN	Myozenin-1	31.7	9.3	26.4	1	2.0	39.73	1.38961	2	3.47	1.48387	2	0.55	0.971591	2	2.92
MZB1_HUMAN	Marginal zone B- and B1-cell-specific protein	20.7	5.3	66	1	6.3	17.54	1.19481	3	13.34	1.91129	3	9.99	1.47159	3	22.67
NADC_HUMAN	Nicotinate-nucleotide pyrophosphorylase [carboxylating]	30.8	5.8	212	4	12.1	9.87	1.35065	12	40.97	0.91129	12	31.7	0.619318	12	32.89
NAGAB_HUMAN	Alpha-N-acetylgalactosaminidase	46.5	4.8	272.1	5	14.4	13.72	0.688312	19	32.11	0.830645	19	60.28	1.10795	19	36.47
NAPSA_HUMAN	Napsin-A	45.4	6.2	250.6	5	13.3	9.60	0.480519	28	72.49	0.701613	28	79.46	1.33523	28	53.31
NAR3_HUMAN	Ecto-ADP-ribosyltransferase 3	43.9	5.7	345.8	8	22.4	12.13	2.12987	24	35.88	2.49194	24	53.32	1.05114	26	30.49
NASP_HUMAN	Nuclear autoantigenic sperm protein	85.2	4.1	25.3	1	1.3	74.57	3.06494	2	2.57	2.20968	2	0.98	0.659091	2	3.55
NCAM1_HUMAN	Neural cell adhesion molecule 1	94.5	4.6	141	2	2.9	9.95	1.02597	11	30.69	1.20968	11	20.89	1.07386	11	14.63
NCOAT_HUMAN	Bifunctional protein NCOAT	102.8	4.7	28.1	1	1.0	51.25	1.48052	4	30.84	3.40323	4	1.33	2.10795	4	30.74
NDRG1_HUMAN	Protein NDRG1	42.8	5.4	285.5	5	19.8	11.61	0.363636	15	69.44	0.540323	17	63.43	1.25	15	23.44
NDUV1_HUMAN	NADH dehydrogenase [ubiquinone] flavoprotein 1, mitochondrial	50.8	9.5	57.2	2	3.0	14.82	0.766234	2	13.32	1.45161	2	61.77	1.71591	2	79.68
NEDD1_HUMAN	Protein NEDD1	71.9	9.1	29.2	1	1.4	13.38	1.20779	9	13.68	1.93548	9	25.52	1.47159	9	23.67
NEGR1_HUMAN	Neuronal growth regulator 1	38.7	5.8	167.2	3	14.4	9.06	0.714286	20	32.68	0.83871	20	17.54	1.07386	20	23.03
NEK11_HUMAN	Serine/threonine-protein kinase Nek11	74.1	4.9	30.5	1	3.1	74.34	6.97403	2	148.91	4.04032	2	166.55	0.528409	2	7.15
NEO1_HUMAN	Neogenin	159.9	6.1	454	9	7.5	11.44	0.428571	27	49.24	0.564516	26	23.15	1.15341	27	48.13
NEP_HUMAN	Neprilysin	85.5	5.4	1453	29	48.4	12.23	0.311688	124	66.57	0.427419	124	46.82	1.26705	124	39.33
NEUR1_HUMAN	Sialidase-1	45.4	5.5	71	2	4.6	15.12	0.662338	6	35.48	1.01613	6	28.55	1.39773	6	11.06
NEUS_HUMAN	Neuroserpin	46.4	4.7	240.3	5	14.1	13.08	0.597403	14	40.83	0.629032	14	43.76	0.971591	14	48.48
NFH_HUMAN	Neurofilament heavy polypeptide	112.4	5.9	80.5	3	2.6	26.21	2.49351	5	89.43	1.02419	5	120.68	0.375	5	117.4
NFM_HUMAN	Neurofilament medium polypeptide	102.4	4.7	51.6	2	1.9	13.47	3.77922	3	76.91	4.89516	3	29.64	1.18182	3	92.73
NGAL_HUMAN	Neutrophil gelatinase-associated lipocalin	22.6	9.6	96.7	2	12.1	6.77	1.05195	18	27.98	1.14516	19	24.16	1.01705	18	14.32
NGBR_HUMAN	Nogo-B receptor	33.2	9.9	30.2	1	2.4	11.50	1.27273	2	0.76	1.18548	2	3.9	0.852273	2	3.14
NHLC3_HUMAN	NHL repeat-containing protein 3	38.3	6.0	223	5	17.3	16.17	0.636364	18	17.9	0.903226	18	21.51	1.29545	18	22.57
NHRF1_HUMAN	Na(+)/H(+) exchange regulatory cofactor NHE-RF1	38.8	5.5	203.6	4	17.0	265.76	0.766234	10	51.61	0.862903	10	23.84	1.03409	10	28.01
NID1_HUMAN	Nidogen-1	136.3	5.0	1152.3	22	20.9	97.63	0.779221	132	45.27	0.927419	159	53.52	1.08523	135	60.2
NID2_HUMAN	Nidogen-2	151.2	5.0	36.2	1	0.8	16.13	1.87013	4	15.16	1.8871	4	12.03	0.920455	4	4.78
NP1L2_HUMAN	Nucleosome assembly protein 1-like 2	52.5	4.2	58.3	2	2.6	28.64	2.7013	6	39.32	1	6	87.53	0.335227	6	40.06
NPC2_HUMAN	Epididymal secretory protein E1	16.6	9.0	193.8	5	25.8	14.30	0.896104	11	28.17	1.52419	12	32.83	1.51705	12	41.23
NPHN_HUMAN	Nephrin	134.7	5.3	27.3	1	1.4	397.33	1.75325	3	6.07	1.50806	3	3.81	0.784091	3	8.44
NPL4_HUMAN	Nuclear protein localization protein 4 homolog	68.1	5.9	26.8	1	1.3	45.23	1.92208	2	13.63	1.41129	2	20.1	0.670455	2	6.34
NQO1_HUMAN	NAD(P)H dehydrogenase [quinone] 1	30.8	9.4	64.7	1	3.6	1.58	2.14286	3	29.61	1.29839	3	10.29	0.556818	3	18.96
NQO2_HUMAN	Ribosyldihydronicotinamide dehydrogenase [quinone]	25.9	5.9	36.6	1	4.8	19.20	0.948052	2	5.54	0.741935	2	7.57	0.715909	2	2.02
NRP1_HUMAN	Neuropilin-1	103.1	5.5	71	1	1.7	221.11	0.727273	5	12.16	1.29032	5	8.27	1.61364	5	11.1
NSA2_HUMAN	Ribosome biogenesis protein NSA2 homolog	30.0	10.8	59.4	2	10.8	482.12	1.55844	4	83.4	0.653226	4	100.51	0.386364	4	11.78
NSF1C_HUMAN	NSFL1 cofactor p47	40.5	4.9	64.5	1	3.2	336.21	1.03896	4	12.08	2.43548	4	11.04	2.14205	4	18.76
NTF2_HUMAN	Nuclear transport factor 2	14.5	5.0	271.5	5	44.9	10.12	0.285714	31	48.97	0.564516	31	22.89	1.85795	31	35.2
NTRK2_HUMAN	BDNF/NT-3 growth factors receptor	91.9	6.0	28.8	1	1.3	5.99	1.7013	2	3.57	2.12903	2	0.61	1.14773	2	4.18
NUCB1_HUMAN	Nucleobindin-1	53.8	5.0	564	10	29.9	9.88	0.623377	23	55.97	0.814516	23	22.02	1.26705	22	42.75
NUDT5_HUMAN	ADP-sugar pyrophosphatase	24.3	4.7	78	2	4.1	16.55	0.844156	2	5.83	0.887097	2	3.4	0.960227	2	2.42
NUDT6_HUMAN	Nucleoside diphosphate-linked moiety X motif 6	35.7	9.1	59.4	1	3.8	2.57	1.12987	4	16.33	1.99194	4	10.21	1.61364	4	20.02
NUP53_HUMAN	Nucleoporin NUP53	34.8	9.7	26	1	2.1	873.14	2.96104	2	25	1.37097	2	7.99	0.420455	2	33.49
NUP98_HUMAN	Nuclear pore complex protein Nup98-Nup96	197.5	6.0	57.9	1	0.3	50.52	2.58442	8	9.93	1.47581	8	12.33	0.522727	8	4.7
OAS1_HUMAN	2'-5'-oligoadenylate synthase 1	46.0	9.4	90.7	3	2.8	345.64	3.15584	38	328.23	0.677419	38	531.9	0.193182	37	45.72
OBSCN_HUMAN	Obscurin	867.9	5.6	130.5	4	0.3	444.73	2.77922	19	66.8	3.68548	19	54.42	1.21023	19	25.22
ODO2_HUMAN	Dihydrolipoyllysine-residue succinyltransferase component of 2-oxoglutarate dehydrogenase complex, mitochondrial	48.7	9.9	176.8	3	7.1	11.30	0.506494	17	38.94	0.822581	17	20.04	1.47159	17	29.45
ODP2_HUMAN	Dihydrolipoyllysine-residue acetyltransferase component of pyruvate dehydrogenase complex, mitochondrial	69.0	8.9	81.7	1	2.6	7.66	0.311688	2	1.21	0.830645	2	9.11	2.40341	2	7.89
OGDHL_HUMAN	2-oxoglutarate dehydrogenase-like, mitochondrial	114.4	6.2	51	2	1.0	10.44	0.402597	2	17.27	0.91129	2	45.38	2.08523	2	66.37
OGFD3_HUMAN	2-oxoglutarate and iron-dependent oxygenase domain-containing protein 3	35.6	9.2	117.6	2	11.9	21.87	0.519481	4	24.52	0.604839	4	11.57	1.0625	4	27.13
OLA1_HUMAN	Obg-like ATPase 1	44.7	8.6	75.9	1	3.8	4.82	0.636364	3	18.05	0.774194	3	21.71	1.11364	3	27.64
OLFM4_HUMAN	Olfactomedin-4	57.2	5.4	1991.6	31	41.4	10.47	0.675325	130	39.43	0.91129	134	34.29	1.21023	133	45.75
OLR1_HUMAN	Oxidized low-density lipoprotein receptor 1	30.9	7.8	94.4	2	7.7	20.70	0.74026	4	18.05	0.66129	5	24.25	0.75	4	28.15
OPCM_HUMAN	Opioid-binding protein/cell adhesion molecule	38.0	6.6	114	2	6.1	13.71	0.441558	5	22.49	0.653226	5	25.36	1.36364	5	9.66
OSBL8_HUMAN	Oxysterol-binding protein-related protein 8	101.1	6.5	54	2	1.7	941.45	0.831169	2	10.74	1.22581	2	32.24	1.34659	2	44.11
OSCAR_HUMAN	Osteoclast-associated immunoglobulin-like receptor	30.5	6.1	127.7	3	10.6	13.08	0.467532	12	15.91	0.362903	13	48.98	0.823864	12	13.66
OSTF1_HUMAN	Osteoclast-stimulating factor 1	23.8	5.3	59.4	1	5.6	1.72	1.25974	2	10.2	1.24194	2	2.54	0.903409	2	7.65
OSTP_HUMAN	Osteopontin	35.4	4.2	281.7	5	26.8	13.07	0.285714	21	79.83	0.209677	21	61.54	0.664773	21	45.94
OTC_HUMAN	Ornithine carbamoyltransferase, mitochondrial	39.9	9.4	45.3	1	6.5	23.98	1.58442	3	12.48	0.725806	3	24.31	0.420455	3	18.28
OXSR1_HUMAN	Serine/threonine-protein kinase OSR1	58.0	6.0	106.5	1	4.2	7.00	0.87013	2	1.61	0.540323	2	51.1	0.568182	2	49.19
P2RX2_HUMAN	P2X purinoceptor 2	51.7	9.3	26.1	1	1.5	71.40	10.6364	4	17.49	4.70968	4	15.72	0.403409	4	2.53
P3IP1_HUMAN	Phosphoinositide-3-kinase-interacting protein 1	28.2	4.8	42.6	1	4.2	9.29	0.467532	4	21.37	0.467742	4	13.72	0.914773	4	13.25
P85B_HUMAN	Phosphatidylinositol 3-kinase regulatory subunit beta	81.5	6.0	32.1	1	1.2	24.64	3.14286	2	1.41	2.74194	2	9.8	0.801136	2	11.23
PA1B2_HUMAN	Platelet-activating factor acetylhydrolase IB subunit beta	25.6	5.5	35.8	1	3.9	5.10	0.415584	3	17.35	0.669355	3	25.26	1.47727	3	33.98
PACE1_HUMAN	Protein-associating with the carboxyl-terminal domain of ezrin	82.8	4.8	26.6	1	2.3	366.77	0.415584	4	10.62	0.395161	4	9.34	0.886364	4	5
PAEP_HUMAN	Glycodelin	20.6	5.3	177.4	3	16.7	15.95	1.01299	9	59.51	0.516129	8	98	0.465909	8	32.39
PAG15_HUMAN	Group XV phospholipase A2	46.6	6.3	357.1	7	22.3	12.94	0.792208	16	61.42	1.06452	16	50.47	1.22159	16	41.27
PAPOB_HUMAN	Poly(A) polymerase beta	71.6	6.0	28.5	1	2.0	374.89	0.506494	3	2.26	0.177419	3	6.74	0.323864	3	4.96
PAPP2_HUMAN	Pappalysin-2	198.4	5.2	726.8	14	9.4	13.53	1.19481	51	25.3	1.00806	52	50.1	0.789773	52	29.07
PARK7_HUMAN	Protein DJ-1	19.9	6.4	187.3	5	21.2	92.99	0.974026	14	28.48	0.508065	14	83.98	0.477273	14	66.05
PB1_HUMAN	Protein polybromo-1	192.8	6.5	54.8	2	1.0	595.96	0.753247	2	85.02	0.5	2	84.73	0.607955	2	0.19
PBLD_HUMAN	Phenazine biosynthesis-like domain-containing protein	31.8	6.1	126	4	16.0	13.29	0.532468	8	51.62	0.419355	8	110.63	0.715909	8	54.24
PCDGK_HUMAN	Protocadherin gamma-C3	101.0	4.9	339.4	5	8.0	15.00	0.662338	30	41.38	0.725806	32	36.76	0.977273	30	45.48
PCDH1_HUMAN	Protocadherin-1	114.7	4.8	346.9	7	8.2	10.27	0.727273	16	46.74	0.879032	16	49.48	1.17045	15	15.55
PCKGC_HUMAN	Phosphoenolpyruvate carboxykinase, cytosolic [GTP]	69.1	5.8	77.6	1	2.4	20.51	0.441558	4	12.42	0.33871	4	7.75	0.693182	4	7.27
PCNT_HUMAN	Pericentrin	377.8	5.3	92.7	1	0.2	20.00	1.37662	2	47.5	0.5	2	11.22	0.329545	2	61.06
PCOC1_HUMAN	Procollagen C-endopeptidase enhancer 1	47.9	8.7	321.8	5	9.1	7.63	1.41558	12	24.01	2.20968	12	26.51	1.42045	12	31.2
PCP_HUMAN	Lysosomal Pro-X carboxypeptidase	55.8	6.9	574.4	10	27.8	54.64	0.506494	39	55.18	0.862903	46	32.4	1.53409	39	51.42
PCYOX_HUMAN	Prenylcysteine oxidase 1	56.6	5.8	158.7	3	8.7	12.20	0.272727	6	43.11	0.508065	6	21.04	1.66477	6	51.37
PDC6I_HUMAN	Programmed cell death 6-interacting protein	96.0	6.1	575.5	12	15.4	9.84	0.428571	35	33.32	0.491935	33	17.91	1.13636	34	23
PDCD5_HUMAN	Programmed cell death protein 5	14.3	5.7	27	1	5.6	1007.96	2.55844	2	8.61	2.23387	2	2.88	0.801136	2	11.51
PDCD6_HUMAN	Programmed cell death protein 6	21.9	5.0	56.9	2	8.9	7.53	0.623377	3	32.39	0.580645	3	10.52	0.846591	3	37.08
PDCL2_HUMAN	Phosducin-like protein 2	28.1	4.6	27.9	1	5.0	3.39	0.194805	2	4.58	0.290323	2	4.1	1.375	2	0.47
PDIA1_HUMAN	Protein disulfide-isomerase	57.1	4.6	939.8	19	35.8	13.03	1.11688	54	33.11	1.33871	55	50.57	1.09091	56	33.16
PDIA3_HUMAN	Protein disulfide-isomerase A3	56.7	5.9	599	12	26.7	13.20	1.45455	31	32.64	1.47581	32	37.22	0.897727	32	38.16
PDIA4_HUMAN	Protein disulfide-isomerase A4	72.9	4.8	194.2	4	4.8	9.62	1.18182	9	18.98	1.53226	9	29.65	1.1875	9	40.76
PDIA6_HUMAN	Protein disulfide-isomerase A6	48.1	4.8	132.2	3	8.9	11.06	0.896104	8	36.63	1.19355	8	30.84	1.23295	8	17.18
PDXK_HUMAN	Pyridoxal kinase	35.1	5.7	78.3	2	12.8	19.50	0.584416	4	93.32	0.612903	4	23.47	0.960227	4	62.6
PDXL2_HUMAN	Podocalyxin-like protein 2	65.0	4.1	72.2	1	2.3	11.18	0.519481	7	35.75	0.677419	7	43.44	1.18182	7	50.51
PDZ1I_HUMAN	PDZK1-interacting protein 1	12.2	4.6	50.2	1	9.6	14.70	0.493506	2	14.24	2.32258	2	9.46	4.29545	2	23.94
PDZ1P_HUMAN	Putative PDZ domain-containing protein 1P	44.0	5.3	207.5	4	12.2	9.19	0.779221	10	20.25	0.862903	10	23.81	1.00568	10	23.13
PEAK1_HUMAN	Pseudopodium-enriched atypical kinase 1	193.0	6.5	52.1	2	1.0	701.26	0.194805	5	154.3	0.217742	5	187.01	1.00568	5	19.92
PEBP1_HUMAN	Phosphatidylethanolamine-binding protein 1	21.0	7.8	707.8	12	69.0	9.20	0.597403	63	40.4	0.596774	63	34.78	0.9375	63	34.84
PEBP4_HUMAN	Phosphatidylethanolamine-binding protein 4	25.7	6.1	420.6	6	44.1	13.95	1.05195	24	36.16	0.887097	25	55.74	0.744318	25	46.44
PEDF_HUMAN	Pigment epithelium-derived factor	46.3	6.0	1063.8	18	44.0	11.48	1.61039	77	25.97	1.33065	76	30.57	0.772727	78	24.92
PEPA3_HUMAN	Pepsin A-3	41.9	4.1	322.8	8	8.8	10.35	0.467532	64	68.66	0.846774	61	48.97	1.47159	64	90.21
PEPC_HUMAN	Gastricsin	42.4	4.2	110.9	3	6.7	12.10	1.23377	21	51.07	1.57258	21	75.55	1.09091	20	21.79
PEPD_HUMAN	Xaa-Pro dipeptidase	54.5	5.6	304.9	7	18.9	10.92	1.14286	21	24.08	0.983871	21	23.53	0.755682	20	15.06
PEPL_HUMAN	Periplakin	204.6	5.4	105.4	3	1.7	17.52	0.337662	4	154.2	0.379032	4	54.63	1.25568	4	41.2
PERE_HUMAN	Eosinophil peroxidase	81.0	11.5	208.5	5	6.3	14.15	2.14286	12	32.02	2.04032	12	67.22	0.869318	12	59.36
PERM_HUMAN	Myeloperoxidase	83.8	10.1	1021.2	19	31.4	10.95	3.72727	72	55.04	2.62097	72	51.91	0.647727	79	25.82
PGAM1_HUMAN	Phosphoglycerate mutase 1	28.8	6.8	290.7	5	29.1	8.56	2.19481	27	312.01	1.62097	27	135.62	0.676136	27	69.28
PGBM_HUMAN	Basement membrane-specific heparan sulfate proteoglycan core protein	468.5	6.1	2315.3	37	8.5	12.48	1.14286	451	65.7	1.22581	453	71.78	0.994318	454	56.17
PGCA_HUMAN	Aggrecan core protein	250.0	4.0	30	1	0.4	6.35	0.623377	2	1.89	1	2	2.42	1.47159	2	4.31
PGFRA_HUMAN	Platelet-derived growth factor receptor alpha	122.6	4.9	60.4	1	1.1	14.18	1.01299	3	46.3	0.709677	3	27.98	0.642045	3	17.22
PGFRB_HUMAN	Platelet-derived growth factor receptor beta	123.9	4.7	195.1	4	4.5	10.31	0.675325	11	25.55	0.782258	11	30.79	1.05682	11	40.06
PGK1_HUMAN	Phosphoglycerate kinase 1	44.6	9.2	517.2	11	31.7	12.08	0.675325	32	49.48	0.822581	32	71.52	1.125	32	53.77
PGM2L_HUMAN	Glucose 1,6-bisphosphate synthase	70.4	7.0	30.8	1	1.1	20.07	0.896104	3	1.24	4.87097	3	2.41	4.98295	3	1.32
PGRP1_HUMAN	Peptidoglycan recognition protein 1	21.7	10.0	462	8	34.7	112.50	1	92	35.11	1.19355	92	30.68	1.05682	92	36.64
PGRP2_HUMAN	N-acetylmuramoyl-L-alanine amidase	62.2	8.0	1311.8	21	47.9	62.14	2.32468	71	57.75	1.76613	72	79.01	0.698864	82	45.48
PGS1_HUMAN	Biglycan	41.6	7.9	209.8	5	14.4	12.52	0.506494	8	32.38	0.564516	8	36.17	1.01136	8	28.29
PH4H_HUMAN	Phenylalanine-4-hydroxylase	51.8	6.2	28.4	1	2.2	64.24	2.06494	4	7.91	0.854839	4	8.66	0.380682	4	3.79
PHAR1_HUMAN	Phosphatase and actin regulator 1	66.3	6.5	26.1	1	1.2	27.81	1.1039	2	2.26	3.64516	2	6.65	3.02841	2	4.39
PHF3_HUMAN	PHD finger protein 3	229.3	6.5	59.4	2	0.8	36.29	4.7013	7	33.73	1.73387	7	29.68	0.335227	7	43.02
PHLB2_HUMAN	Pleckstrin homology-like domain family B member 2	142.1	7.2	83.6	2	0.6	38.03	1.1039	3	40.99	3.83065	3	29.11	3.16477	3	19.9
PHLD_HUMAN	Phosphatidylinositol-glycan-specific phospholipase D	92.3	5.9	279.6	6	8.5	12.96	3.51948	11	28.97	2.1129	11	29.68	0.545455	13	25.1
PHS_HUMAN	Pterin-4-alpha-carbinolamine dehydratase	12.0	6.3	41.1	1	12.5	405.98	0.402597	5	25.57	0.33871	5	14.67	0.755682	5	30.85
PI16_HUMAN	Peptidase inhibitor 16	49.4	5.1	528.7	10	19.4	14.47	0.883117	70	19.91	1.21774	71	39.23	1.31818	73	29.01
PIBF1_HUMAN	Progesterone-induced-blocking factor 1	89.7	5.7	86.5	2	2.6	17.01	1.79221	5	24.9	2.91935	5	67.71	1.48864	5	40.36
PIGR_HUMAN	Polymeric immunoglobulin receptor	83.2	5.5	1896.7	35	42.0	9.06	0.857143	271	58.8	1.05645	270	67.54	1.10227	272	47.34
PIP_HUMAN	Prolactin-inducible protein	16.6	9.3	482.9	9	49.3	8.70	0.636364	39	60.39	0.637097	40	53.24	0.9375	41	35.5
PITH1_HUMAN	PITH domain-containing protein 1	24.2	5.4	103.3	2	9.5	12.95	0.818182	3	43.32	1.24194	3	10.04	1.375	3	38.07
PK3C3_HUMAN	Phosphatidylinositol 3-kinase catalytic subunit type 3	101.5	6.4	94.6	3	2.3	833.24	0.298701	4	122.07	0.548387	4	112.5	1.70455	4	21.07
PK3CG_HUMAN	Phosphatidylinositol 4,5-bisphosphate 3-kinase catalytic subunit gamma isoform	126.4	7.5	57.2	2	1.5	412.27	0.857143	5	88.22	0.701613	5	50.07	0.75	5	186.89
PKHH1_HUMAN	Pleckstrin homology domain-containing family H member 1	151.1	9.0	30.1	1	0.7	25.61	0.220779	2	3.25	0.330645	2	5.96	1.32386	2	2.71
PLA2R_HUMAN	Secretory phospholipase A2 receptor	168.5	5.7	79.6	2	1.4	25.74	3.25974	3	61.1	1.70161	3	52.46	0.477273	3	47.31
PLAK_HUMAN	Junction plakoglobin	81.7	5.7	89.9	3	6.3	227.00	0.441558	3	52.54	0.733871	5	34.8	1.46023	3	44.43
PLBL2_HUMAN	Putative phospholipase B-like 2	65.4	6.4	348.1	7	14.1	11.91	0.714286	35	22.57	0.903226	34	23.97	1.11932	35	24.27
PLCB1_HUMAN	1-phosphatidylinositol 4,5-bisphosphate phosphodiesterase beta-1	138.5	5.8	59.5	1	1.5	54.28	0.532468	3	12.76	0.766129	3	7.06	1.32955	3	17.21
PLCH1_HUMAN	1-phosphatidylinositol 4,5-bisphosphate phosphodiesterase eta-1	189.1	8.7	141.7	5	2.2	325.96	1.07792	7	100.67	0.66129	7	66.29	0.5625	7	41.87
PLCH2_HUMAN	1-phosphatidylinositol 4,5-bisphosphate phosphodiesterase eta-2	154.6	9.0	34.9	1	1.8	275.35	0.116883	2	8.25	0.0645161	2	4.85	0.517045	2	3.39
PLCL2_HUMAN	Inactive phospholipase C-like protein 2	125.8	6.5	64.4	2	2.1	66.27	3.37662	7	74.8	1.79032	7	14.05	0.482955	7	86.58
PLD3_HUMAN	Phospholipase D3	54.7	6.0	194.8	4	14.1	13.25	0.727273	11	63.12	1.45968	11	81.1	1.82955	11	87.47
PLD5_HUMAN	Inactive phospholipase D5	61.3	9.7	25.2	1	1.3	982.76	4.84416	3	7.53	4.32258	3	4.7	0.818182	3	11.91
PLDX1_HUMAN	Plexin domain-containing protein 1	55.7	5.4	110.7	2	6.6	256.57	0.61039	4	16.37	0.403226	4	28.42	0.602273	4	44.27
PLEC_HUMAN	Plectin	531.5	5.7	551.5	12	2.7	11.05	1.19481	16	35.06	1.18548	16	51.19	0.909091	16	32.53
PLIN4_HUMAN	Perilipin-4	134.3	9.7	27.3	1	0.8	850.28	0.688312	9	120.46	0.653226	9	131.49	0.863636	9	15.21
PLMN_HUMAN	Plasminogen	90.5	7.3	605.2	12	15.1	12.22	2.53247	90	39.62	2.18548	90	44.17	0.744318	92	36.38
PLSI_HUMAN	Plastin-1	70.2	5.2	535.2	10	21.5	11.32	1.76623	34	67.29	1.60484	35	75.68	0.903409	34	55.16
PLSL_HUMAN	Plastin-2	70.2	5.2	1786.5	38	60.3	11.95	1.96104	126	57.6	1.5	127	53.11	0.721591	133	31.38
PLST_HUMAN	Plastin-3	70.8	5.3	280.4	6	7.9	11.73	1.2987	25	62.02	1.26613	25	68.03	0.892045	25	39.11
PLTP_HUMAN	Phospholipid transfer protein	54.7	6.6	101	2	6.3	9.21	1.12987	4	27.82	1.20161	4	61.81	0.971591	4	40.01
PNPH_HUMAN	Purine nucleoside phosphorylase	32.1	6.5	525.2	10	43.6	14.68	0.74026	32	49.43	0.927419	32	38.91	1.15909	32	49.99
PO2F3_HUMAN	POU domain, class 2, transcription factor 3	47.4	9.6	118.5	3	4.6	460.87	2.55844	6	47.93	0.758065	6	40.32	0.267045	6	18.41
PODXL_HUMAN	Podocalyxin	58.6	5.2	100.5	2	3.8	11.62	0.337662	8	25.76	0.403226	8	14	1.10227	8	13.9
PON1_HUMAN	Serum paraoxonase/arylesterase 1	39.7	5.0	495.8	10	40.8	14.01	2.87013	32	62.5	2.90323	32	66.39	0.892045	36	21.73
POSTN_HUMAN	Periostin	93.3	7.8	54.6	1	1.7	13.17	0.415584	2	79.49	2.1371	2	15.89	4.72727	2	58.42
PP1G_HUMAN	Serine/threonine-protein phosphatase PP1-gamma catalytic subunit	37.0	6.1	52.2	1	5.3	7.59	1.22078	4	18.91	1.28226	4	15.32	0.965909	4	9.23
PP2BB_HUMAN	Serine/threonine-protein phosphatase 2B catalytic subunit beta isoform	59.0	5.5	60.6	2	2.5	11.53	0.87013	10	13.02	3.47581	11	29.05	3.94318	10	17.79
PPAL_HUMAN	Lysosomal acid phosphatase	48.3	6.3	290.3	6	14.7	8.80	0.38961	35	39.74	0.612903	35	31.79	1.40341	34	22.2
PPAP_HUMAN	Prostatic acid phosphatase	44.5	5.8	1452.7	29	38.1	111.01	0.155844	244	108.19	0.233871	242	60.71	1.36932	239	74.44
PPBI_HUMAN	Intestinal-type alkaline phosphatase	56.8	5.5	257.5	5	15.0	12.45	0.623377	13	66.26	0.741935	13	107.09	1.09659	13	36.34
PPC1A_HUMAN	Phosphatidate phosphatase PPAPDC1A	30.4	9.6	27.9	1	2.6	21.90	1.61039	3	61.87	0.903226	3	24.04	0.511364	3	36.82
PPGB_HUMAN	Lysosomal protective protein	54.4	6.2	609.4	13	21.0	12.70	0.766234	58	44.56	1.02419	58	41.26	1.22159	58	40.78
PPIA_HUMAN	Peptidyl-prolyl cis-trans isomerase A	18.0	9.0	522.7	10	67.9	10.52	0.545455	45	35.11	1.01613	47	46.49	1.67045	46	46.19
PPIB_HUMAN	Peptidyl-prolyl cis-trans isomerase B	23.7	9.9	330.4	7	31.0	169.95	0.584416	23	50.19	1.14516	23	32.62	1.80114	23	48.8
PPIC_HUMAN	Peptidyl-prolyl cis-trans isomerase C	22.7	9.3	77.8	2	7.5	10.85	0.402597	7	28.21	0.798387	7	4.89	1.78977	7	27.41
PPM1G_HUMAN	Protein phosphatase 1G	59.2	4.1	27.6	1	2.4	18.91	0.727273	3	13.75	0.233871	3	39.19	0.295455	3	24.49
PPT1_HUMAN	Palmitoyl-protein thioesterase 1	34.2	6.1	193.5	3	15.4	8.65	0.688312	9	31.02	1.00806	9	35.77	1.33523	9	19.32
PPT2_HUMAN	Lysosomal thioesterase PPT2	34.2	5.9	52.4	1	4.6	25.62	0.467532	2	28.88	0.596774	2	6.54	1.15909	2	22.02
PR40B_HUMAN	Pre-mRNA-processing factor 40 homolog B	99.3	6.4	62.2	2	3.4	719.23	5.36364	5	206.56	1.37903	5	180.71	0.232955	5	23.35
PRAX_HUMAN	Periaxin	154.8	7.8	56.1	1	0.3	6.63	0.558442	2	26.26	1.52419	2	4.43	2.49432	2	21.64
PRDX1_HUMAN	Peroxiredoxin-1	22.1	9.2	546.5	10	46.2	10.59	0.675325	66	46.28	0.935484	66	31.85	1.26136	66	40.52
PRDX2_HUMAN	Peroxiredoxin-2	21.9	5.6	428.3	9	40.4	9.55	1	86	50.34	2.06452	87	46.53	1.90341	87	75.85
PRDX3_HUMAN	Thioredoxin-dependent peroxide reductase, mitochondrial	27.7	8.9	85.1	2	8.6	291.85	1.19481	9	49.17	1.6371	9	65.82	1.25	9	26.13
PRDX5_HUMAN	Peroxiredoxin-5, mitochondrial	22.1	9.9	143	3	18.2	9.53	1.15584	10	18.36	1.25	10	24.83	0.988636	10	17.96
PRDX6_HUMAN	Peroxiredoxin-6	25.0	6.0	371.7	7	31.7	20.64	0.376623	24	42.88	0.717742	28	21.44	1.73295	24	47.03
PREX1_HUMAN	Phosphatidylinositol 3,4,5-trisphosphate-dependent Rac exchanger 1 protein	186.1	6.0	36.8	1	0.5	62.97	0.61039	3	27.94	1.12903	3	16.81	1.68182	3	37.01
PRG2_HUMAN	Bone marrow proteoglycan	25.2	6.4	121.7	3	18.5	7.14	1.19481	8	31.3	1.40323	8	30.55	1.06818	8	35.02
PRLR_HUMAN	Prolactin receptor	69.5	5.1	73.4	1	1.9	2.20	1.28571	2	4.87	10.9032	2	21.22	7.76705	2	16.22
PROF1_HUMAN	Profilin-1	15.0	9.4	654	11	62.9	199.57	2.19481	111	41.29	1.87097	112	46.09	0.795455	111	17.59
PROF2_HUMAN	Profilin-2	15.0	7.5	52.7	1	5.7	13.66	0.701299	3	6.52	0.91129	3	3.31	1.1875	3	8.95
PROM1_HUMAN	Prominin-1	97.1	7.2	602.9	11	18.3	9.88	0.467532	42	47.67	0.5	41	30.11	0.965909	41	33.27
PROS_HUMAN	Vitamin K-dependent protein S	75.1	5.4	144.7	4	7.8	7.37	1.72727	6	13.76	1.72581	6	27.06	0.943182	7	25.72
PROZ_HUMAN	Vitamin K-dependent protein Z	44.7	5.6	490.9	10	24.2	12.14	0.428571	59	47.1	0.556452	60	55.17	1.14773	59	57.66
PRPS1_HUMAN	Ribose-phosphate pyrophosphokinase 1	34.8	6.6	93.1	3	5.7	143.95	0.987013	8	10.74	0.290323	8	75.29	0.272727	8	68.5
PRPS2_HUMAN	Ribose-phosphate pyrophosphokinase 2	34.7	6.2	58.5	2	5.0	9.59	2.28571	3	127.86	2.59677	3	120.39	1.03977	3	3.81
PRS8_HUMAN	26S protease regulatory subunit 8	45.6	7.8	82.4	2	2.5	863.73	1.28571	4	83.79	0.669355	4	93.09	0.471591	4	10
PRSS8_HUMAN	Prostasin	36.4	5.5	245	4	9.6	6.24	0.714286	14	58.08	0.814516	21	31.39	1.07386	14	44.22
PRTG_HUMAN	Protogenin	127.0	7.9	27	1	1.1	590.34	5.42857	4	9.95	3.66935	4	12.28	0.619318	4	17.32
PRTN3_HUMAN	Myeloblastin	27.8	10.3	178.5	4	20.7	8.82	2.81818	20	57.01	2.1371	20	45.59	0.693182	20	38.05
PSA_HUMAN	Puromycin-sensitive aminopeptidase	103.2	5.4	103.6	3	6.0	10.26	1.24675	4	32.77	1.20968	4	23.96	0.892045	4	35.21
PSA1_HUMAN	Proteasome subunit alpha type-1	29.5	6.2	91.1	2	10.6	321.20	0.87013	4	40.48	0.669355	4	36.47	0.704545	4	13.46
PSA2_HUMAN	Proteasome subunit alpha type-2	25.9	7.7	303.6	4	23.1	9.21	1.06494	12	19.22	1.23387	13	28.72	1.01705	12	35.22
PSA3_HUMAN	Proteasome subunit alpha type-3	28.4	5.1	128.8	2	9.4	16.79	0.753247	6	26.91	0.91129	6	39.14	1.10795	6	21.47
PSA5_HUMAN	Proteasome subunit alpha type-5	26.4	4.6	200.9	4	18.7	9.70	0.662338	8	43.67	0.975806	8	40.53	1.36364	8	44.82
PSA6_HUMAN	Proteasome subunit alpha type-6	27.4	6.4	147.2	2	10.2	7.97	0.714286	6	25.04	0.943548	6	17.05	1.19886	6	13.63
PSA7_HUMAN	Proteasome subunit alpha type-7	27.9	9.3	79.8	2	6.5	8.02	1.03896	3	10.46	1.16129	3	12.69	1.01705	3	20.65
PSB1_HUMAN	Proteasome subunit beta type-1	26.5	9.1	197.6	5	20.7	10.15	1.03896	11	20.99	1.07258	11	27.38	0.988636	10	16.73
PSB2_HUMAN	Proteasome subunit beta type-2	22.8	6.6	78.1	2	10.4	8.23	0.844156	8	27.38	1.07258	8	33.92	1.16477	8	52.53
PSB3_HUMAN	Proteasome subunit beta type-3	22.9	6.2	173.4	2	8.8	4.33	0.961039	8	27.44	0.895161	7	19.16	0.9375	7	18.46
PSB5_HUMAN	Proteasome subunit beta type-5	28.5	6.5	32.7	1	3.0	7.45	0.883117	2	1.24	0.822581	2	1.26	0.852273	2	0.01
PSB6_HUMAN	Proteasome subunit beta type-6	25.3	4.7	50	1	4.2	6.17	0.623377	4	7.99	0.709677	4	9.74	1.03409	4	16.23
PSB7_HUMAN	Proteasome subunit beta type-7	29.9	8.8	101.9	2	7.2	9.62	0.883117	3	13.73	1.01613	3	38.63	1.05682	3	25.03
PSCA_HUMAN	Prostate stem cell antigen	12.9	4.9	60.8	1	8.1	10.95	0.220779	5	69.2	0.467742	5	14.56	1.92614	5	52.87
PSD12_HUMAN	26S proteasome non-ATPase regulatory subunit 12	52.9	8.5	86.2	2	4.2	61.11	0.779221	5	17.7	0.830645	5	16.28	0.977273	5	34.35
PSD7_HUMAN	26S proteasome non-ATPase regulatory subunit 7	37.0	6.3	43.4	1	5.2	275.06	0.779221	3	18.71	0.604839	3	4.79	0.710227	3	21.03
PSMD1_HUMAN	26S proteasome non-ATPase regulatory subunit 1	105.8	5.1	67.2	2	1.7	14.67	0.662338	2	24.97	0.967742	2	11.47	1.34659	2	13.22
PSMD2_HUMAN	26S proteasome non-ATPase regulatory subunit 2	100.1	4.9	65.5	2	3.1	9.96	0.233766	3	107.99	0.274194	3	77.41	1.05682	3	19.99
PSME1_HUMAN	Proteasome activator complex subunit 1	28.7	5.7	252.5	5	22.5	16.25	0.844156	10	51	1.12903	10	35.16	1.23295	10	32.6
PSME2_HUMAN	Proteasome activator complex subunit 2	27.4	5.4	161.4	3	18.8	18.16	0.857143	10	44.91	1.42742	10	54.67	1.5	11	43.14
PSME4_HUMAN	Proteasome activator complex subunit 4	211.2	6.5	61.6	1	0.9	17.96	1.81818	9	22.46	0.75	9	16.06	0.375	9	18.47
PTBP1_HUMAN	Polypyrimidine tract-binding protein 1	57.2	9.8	87.5	2	4.7	11.89	0.961039	14	50.61	1.39516	14	17.35	1.32386	14	59.11
PTBP3_HUMAN	Polypyrimidine tract-binding protein 3	59.7	9.7	33.8	1	1.4	55.04	0.974026	3	3.94	0.620968	3	7.95	0.579545	3	7.8
PTER_HUMAN	Phosphotriesterase-related protein	39.0	6.1	87.5	2	8.6	9.47	0.636364	4	40.69	1.20968	4	21.21	1.71591	4	56.71
PTGDS_HUMAN	Prostaglandin-H2 D-isomerase	21.0	8.9	1656.3	30	51.1	10.45	1.33766	271	40.29	1.60484	289	66.44	1.15341	285	40.07
PTGR1_HUMAN	Prostaglandin reductase 1	35.8	9.2	425.5	6	24.9	9.57	0.805195	20	44.18	0.645161	19	24.65	0.767045	20	26.84
PTN21_HUMAN	Tyrosine-protein phosphatase non-receptor type 21	133.2	8.7	53.7	2	2.3	864.80	0.896104	3	60.85	0.774194	3	51.15	0.784091	3	8.5
PTPRG_HUMAN	Receptor-type tyrosine-protein phosphatase gamma	161.9	6.0	399	8	6.8	16.64	0.974026	30	34.49	1.23387	34	59.08	1.1875	31	49.43
PTPRJ_HUMAN	Receptor-type tyrosine-protein phosphatase eta	145.9	5.3	70.1	1	1.0	15.14	0.857143	3	10.44	0.564516	3	7.19	0.602273	3	15.8
PTPRS_HUMAN	Receptor-type tyrosine-protein phosphatase S	216.9	6.0	49.7	1	0.7	387.82	0.441558	3	8.76	0.612903	3	1.1	1.27841	3	9.19
PVR_HUMAN	Poliovirus receptor	45.3	6.1	128.8	3	7.9	8.52	0.61039	6	34.01	0.491935	6	35.84	0.738636	6	36.23
PVRL1_HUMAN	Poliovirus receptor-related protein 1	57.1	5.7	93.1	2	4.6	8.65	0.597403	6	61.25	0.725806	6	24.83	1.09659	6	34.97
PVRL2_HUMAN	Poliovirus receptor-related protein 2	57.7	4.6	321.9	7	12.6	7.83	0.792208	24	37.95	1.25	24	43.15	1.44886	25	38.75
PVRL3_HUMAN	Poliovirus receptor-related protein 3	61.0	5.8	33	1	4.9	12.51	2.02597	3	35.13	0.943548	3	18.58	0.426136	3	20.46
PVRL4_HUMAN	Poliovirus receptor-related protein 4	55.4	5.1	282.1	4	10.6	15.30	0.428571	20	28.64	0.709677	20	22.05	1.59091	19	24.65
PXDC2_HUMAN	Plexin domain-containing protein 2	59.5	6.0	171.3	4	11.3	7.40	1.33766	9	25.59	0.653226	9	22.36	0.443182	9	22.93
PYGB_HUMAN	Glycogen phosphorylase, brain form	96.6	6.4	50.3	1	2.0	6.00	1.37662	3	43.01	0.830645	3	20.45	0.551136	3	25.42
PZP_HUMAN	Pregnancy zone protein	163.8	5.9	824.1	15	9.4	68.12	4.51948	123	101.94	3.44355	123	131.76	0.681818	137	42.53
QN1_HUMAN	Protein QN1 homolog	161.8	5.2	53.8	2	1.1	521.96	0.376623	2	46.16	0.612903	2	0.67	1.50568	2	45.39
QOR_HUMAN	Quinone oxidoreductase	35.2	9.2	139.5	3	15.5	19.82	0.987013	7	25.9	1.08871	7	19.19	1.00568	7	30.36
QPCT_HUMAN	Glutaminyl-peptide cyclotransferase	40.9	6.1	800.1	13	44.9	11.14	0.480519	58	79.43	1.04032	61	30.07	1.95455	58	93.3
QSOX1_HUMAN	Sulfhydryl oxidase 1	82.5	9.9	371.2	7	10.7	12.77	0.636364	24	48.86	0.991935	25	42.08	1.30682	24	41.06
R3HD2_HUMAN	R3H domain-containing protein 2	106.9	9.6	81.2	3	2.5	743.04	1.19481	6	15.17	0.943548	6	41.53	0.721591	6	29.42
R4RL2_HUMAN	Reticulon-4 receptor-like 2	46.1	9.0	70.6	2	4.0	4.95	0.324675	8	30.19	0.443548	8	14.14	1.23864	8	25.88
RAB10_HUMAN	Ras-related protein Rab-10	22.5	9.4	307.5	5	27.5	12.70	0.441558	24	57.78	0.572581	24	21.08	1.19886	24	43.74
RAB13_HUMAN	Ras-related protein Rab-13	22.8	10.0	128.2	3	12.8	11.36	0.571429	12	50.82	0.564516	11	31.35	0.954545	11	27.3
RAB14_HUMAN	Ras-related protein Rab-14	23.9	5.8	99.9	2	8.8	11.66	0.337662	6	47.89	0.629032	6	22.15	1.67045	6	28.92
RAB1A_HUMAN	Ras-related protein Rab-1A	22.7	5.9	371.1	7	34.1	10.44	0.571429	26	40.66	0.741935	26	26.65	1.19318	26	34.51
RAB1B_HUMAN	Ras-related protein Rab-1B	22.2	5.4	351.1	7	38.8	10.01	0.61039	27	46.61	0.75	27	24.52	1.13068	27	43.1
RAB35_HUMAN	Ras-related protein Rab-35	23.0	9.4	147.7	3	14.9	11.50	0.584416	11	42.72	0.645161	11	20.86	1.01705	11	37.97
RAB3B_HUMAN	Ras-related protein Rab-3B	24.7	4.7	242	4	21.9	7.39	0.311688	12	11.48	0.508065	12	23.8	1.46591	12	23.16
RAB3D_HUMAN	Ras-related protein Rab-3D	24.3	4.6	209.4	4	19.2	7.61	0.350649	10	13.55	0.483871	10	24.07	1.26705	10	24.71
RAB5C_HUMAN	Ras-related protein Rab-5C	23.5	9.5	125.2	3	9.7	5.71	0.480519	7	57.09	0.443548	7	21.07	0.846591	7	38.9
RAB7A_HUMAN	Ras-related protein Rab-7a	23.5	7.2	37.6	1	6.8	12.36	1.77922	2	0.08	1.21774	2	3.19	0.625	2	3.28
RABL6_HUMAN	Rab-like protein 6	79.5	5.0	55.7	2	3.3	16.88	0.974026	2	84.22	0.862903	2	49.34	0.8125	2	27.02
RABP2_HUMAN	Cellular retinoic acid-binding protein 2	15.7	5.2	26.8	1	6.5	8.31	0.844156	2	3.93	1.12903	2	0.06	1.22727	2	3.99
RAC1_HUMAN	Ras-related C3 botulinum toxin substrate 1	21.4	9.7	187.5	4	21.4	13.97	0.61039	12	55.66	0.782258	12	54.44	1.18182	12	47.74
RAC2_HUMAN	Ras-related C3 botulinum toxin substrate 2	21.4	8.9	255.9	5	21.9	14.69	1.06494	14	39.03	1.12903	14	36.75	0.965909	14	49.83
RAD26_HUMAN	Putative DNA repair and recombination protein RAD26-like	81.0	10.0	28.6	1	1.4	714.64	0.207792	13	19.95	0.362903	13	8.95	1.625	13	15.04
RAD50_HUMAN	DNA repair protein RAD50	153.8	6.5	87.5	3	2.5	19.06	0.363636	6	177.49	0.580645	6	73.58	1.48864	6	108.01
RADI_HUMAN	Radixin	68.5	6.0	403	9	11.0	11.31	0.571429	43	22.13	0.645161	41	25.48	1.0625	42	34.83
RALB_HUMAN	Ras-related protein Ral-B	23.4	6.3	68.6	2	8.7	8.14	0.987013	5	70.55	0.5	5	18.4	0.465909	5	53.19
RAN_HUMAN	GTP-binding nuclear protein Ran	24.4	7.8	66.8	2	13.4	14.65	1.38961	2	3.6	1.35484	2	6.64	0.892045	2	10.26
RAP1A_HUMAN	Ras-related protein Rap-1A	21.0	7.2	329.8	6	34.8	9.34	0.558442	24	52.19	0.620968	23	23.78	0.982955	24	44.74
RARA_HUMAN	Retinoic acid receptor alpha	50.7	9.3	55.6	1	1.3	19.03	2.27273	2	11.2	0.846774	2	17.84	0.340909	2	6.54
RB_HUMAN	Retinoblastoma-associated protein	106.1	8.9	111.6	3	2.7	13.34	2.93506	21	46.06	2.68548	20	17.12	0.75	21	12.26
RB11A_HUMAN	Ras-related protein Rab-11A	24.4	6.1	182.2	4	21.8	350.14	0.467532	14	31.08	0.774194	14	39.89	1.50568	14	39.93
RB27B_HUMAN	Ras-related protein Rab-27B	24.6	5.2	120.3	2	8.7	7.28	0.12987	8	21.09	0.241935	8	17.23	1.66477	8	13.51
RB33B_HUMAN	Ras-related protein Rab-33B	25.7	6.9	75.3	2	10.9	338.99	0.337662	3	6.36	0.564516	3	33.66	1.52273	3	28.12
RBGPR_HUMAN	Rab3 GTPase-activating protein non-catalytic subunit	155.9	5.3	82.2	2	1.3	38.52	0.87013	2	49.5	0.467742	2	84.84	0.494318	2	27.31
RBP2_HUMAN	E3 SUMO-protein ligase RanBP2	358.0	5.8	32.6	1	0.4	776.39	4.35065	2	25.48	1.08065	2	10.48	0.215909	4	26.36
RD23A_HUMAN	UV excision repair protein RAD23 homolog A	39.6	4.4	105.1	2	10.5	13.05	1.24675	3	47.51	1.41935	3	5.77	1.04545	3	49.84
RD23B_HUMAN	UV excision repair protein RAD23 homolog B	43.1	4.6	248.9	5	14.2	7.56	1.09091	14	17.96	1.25806	16	37.36	1.08523	15	28.35
REG1A_HUMAN	Lithostathine-1-alpha	18.7	5.6	166.3	2	22.9	15.17	1.2987	11	35.87	1.83871	11	22.41	1.26136	12	20.2
REG3A_HUMAN	Regenerating islet-derived protein 3-alpha	19.4	9.0	246.6	4	32.0	14.03	1.20779	30	53.35	1.55645	31	80.43	1.19886	30	35.5
REG4_HUMAN	Regenerating islet-derived protein 4	18.2	10.2	234.8	3	25.9	16.11	0.987013	32	81.56	0.935484	34	64.09	0.886364	34	36.98
RET2_HUMAN	Retinol-binding protein 2	15.7	5.1	106.3	2	14.2	15.43	4.83117	5	15.92	5.5	5	13.74	1.04545	5	5.8
RET4_HUMAN	Retinol-binding protein 4	23.0	5.7	1586.2	29	78.6	14.42	2.24675	271	47	3.59677	272	83.42	1.42045	354	44.12
RET5_HUMAN	Retinol-binding protein 5	15.9	6.1	46.1	1	6.7	12.53	0.597403	2	8.46	0.717742	2	3.85	1.10795	2	12.34
RETN_HUMAN	Resistin	11.4	7.7	55.1	1	10.2	14.71	0.792208	17	15.94	1.16935	17	19.11	1.34659	17	21.31
RHCG_HUMAN	Ammonium transporter Rh type C	53.1	5.9	27.3	1	1.5	2.50	0.272727	3	5.06	0.274194	3	0.55	0.914773	3	5.37
RHG01_HUMAN	Rho GTPase-activating protein 1	50.4	5.8	79.2	2	5.7	14.80	0.87013	6	48.34	0.806452	6	45.38	0.846591	6	44.28
RHG21_HUMAN	Rho GTPase-activating protein 21	217.2	8.6	31.1	1	0.4	26.67	2.22078	3	15.25	24.2097	3	8.75	10.2898	4	9.63
RHOA_HUMAN	Transforming protein RhoA	21.8	5.8	166	4	31.6	9.02	0.649351	8	69.75	0.66129	9	12.04	0.9375	8	63.47
RIC3_HUMAN	Protein RIC-3	41.1	4.9	27.2	1	1.4	5.94	7.38961	2	21.95	5.23387	2	29.81	0.647727	2	7.5
RIF1_HUMAN	Telomere-associated protein RIF1	274.3	5.3	57.6	2	0.9	43.75	0.675325	3	41.94	1.34677	3	9.67	1.80682	3	51.94
RINI_HUMAN	Ribonuclease inhibitor	49.9	4.6	191.7	4	12.1	14.33	1.02597	7	40.4	0.822581	7	48.37	0.732955	7	38.76
RISC_HUMAN	Retinoid-inducible serine carboxypeptidase	50.8	5.5	217.1	4	10.6	12.27	0.623377	20	42.12	0.766129	20	17.86	1.10795	20	55.32
RL18A_HUMAN	60S ribosomal protein L18a	20.7	11.7	30	1	5.1	21.09	1.1039	2	5.32	1.21774	2	9.72	1.01705	2	4.38
RL1D1_HUMAN	Ribosomal L1 domain-containing protein 1	54.9	10.7	31.8	1	3.3	68.86	3.27273	2	15.39	1.17742	2	2.72	0.329545	2	18.17
RL40_HUMAN	Ubiquitin-60S ribosomal protein L40	14.7	10.7	180.2	3	24.2	12.46	0.74026	25	51.7	0.798387	25	22.06	1.01705	24	31.71
RL6_HUMAN	60S ribosomal protein L6	32.7	11.1	81.7	2	11.1	7.20	0.363636	2	41.96	0.580645	5	48.2	1.49432	2	50.45
RLA0_HUMAN	60S acidic ribosomal protein P0	34.3	5.6	57.5	2	6.0	56.64	1.05195	2	106.84	1.12903	2	31.28	0.977273	2	61.6
RLA1_HUMAN	60S acidic ribosomal protein P1	11.5	4.0	66.4	1	14.0	8.74	1	5	35.41	0.91129	5	22.75	0.835227	5	22.95
RLA2_HUMAN	60S acidic ribosomal protein P2	11.7	4.2	102.3	1	16.5	15.90	0.883117	8	41.15	1.02419	8	44.15	1.05682	8	56.84
RN167_HUMAN	E3 ubiquitin-protein ligase RNF167	38.3	5.3	60.3	2	2.0	739.02	1.31169	6	54.06	0.951613	6	51.35	0.659091	6	11.11
RNAS2_HUMAN	Non-secretory ribonuclease	18.3	10.6	129.7	3	10.6	20.93	0.441558	16	126.13	0.516129	16	120.16	1.15341	17	49.76
RNBP6_HUMAN	Ran-binding protein 6	124.6	4.7	52.8	1	0.7	10.56	2.18182	8	9.59	0.991935	8	8.3	0.414773	8	6.12
RNT2_HUMAN	Ribonuclease T2	29.5	6.8	428.5	9	24.6	9.93	0.974026	32	32.01	2.62903	33	78.48	2.47159	32	55.57
ROBO4_HUMAN	Roundabout homolog 4	107.4	6.2	799.6	16	16.7	18.40	0.441558	57	56.55	0.693548	65	30.67	1.42614	57	51.7
ROR1_HUMAN	Tyrosine-protein kinase transmembrane receptor ROR1	104.2	6.8	88.8	2	2.1	5.49	1.09091	5	16.09	0.790323	5	8.64	0.670455	5	20.62
RPAP3_HUMAN	RNA polymerase II-associated protein 3	75.7	6.5	111.5	4	2.7	725.31	1.28571	29	39.04	0.83871	29	96.56	0.596591	29	86.49
RPTOR_HUMAN	Regulatory-associated protein of mTOR	148.9	6.5	81	3	1.6	466.80	0.922078	3	72.5	0.766129	3	39.45	0.755682	3	27.59
RRAGA_HUMAN	Ras-related GTP-binding protein A	36.5	8.8	98.6	3	5.1	13.18	3.18182	16	45.72	1.39516	16	25.44	0.414773	17	35.22
RRAS2_HUMAN	Ras-related protein R-Ras2	23.4	5.7	70.8	2	13.2	10.55	0.532468	2	17.4	0.524194	2	11.85	0.897727	2	5.47
RRBP1_HUMAN	Ribosome-binding protein 1	152.4	9.3	107.8	3	1.8	21.52	7.09091	5	792.77	6.3871	5	561.59	0.823864	5	38.43
RRP12_HUMAN	RRP12-like protein	143.6	9.8	28	1	0.5	3.92	2.64935	3	5.06	0.854839	3	9.45	0.295455	3	6.68
RRP5_HUMAN	Protein RRP5 homolog	208.6	9.6	108.1	3	1.2	939.36	0.857143	11	54.4	6.94355	11	154.14	7.40909	11	156.65
RS15_HUMAN	40S ribosomal protein S15	17.0	10.8	26.8	1	3.4	12.99	1.11688	2	2.61	1.3871	2	0.32	1.14205	2	2.93
RS4Y2_HUMAN	40S ribosomal protein S4, Y isoform 2	29.3	10.9	26	1	2.3	14.86	3.14286	3	5.25	4.27419	3	10.07	1.24432	3	8.64
RSSA_HUMAN	40S ribosomal protein SA	32.8	4.6	166.3	2	12.9	8.71	0.649351	5	23.81	0.870968	5	33.24	1.23864	5	33.06
RUSD2_HUMAN	RNA pseudouridylate synthase domain-containing protein 2	61.3	6.8	31.2	1	1.8	23.63	6.96104	3	10.16	3.3871	3	9.3	0.443182	3	8.82
RUVB2_HUMAN	RuvB-like 2	51.1	5.4	25.5	1	4.3	270.48	0.324675	2	9.66	0.209677	2	9.43	0.596591	2	19.23
RUXE_HUMAN	Small nuclear ribonucleoprotein E	10.8	10.0	40.3	1	12.0	7.73	1.11688	4	49.27	1.40323	4	34.79	1.14205	4	28.07
RWDD3_HUMAN	RWD domain-containing protein 3	30.5	5.8	53.5	2	6.4	512.23	1.09091	2	87.98	0.733871	2	10.92	0.613636	2	105.69
S100P_HUMAN	Protein S100-P	10.4	4.6	112.1	2	15.8	6.61	1.57143	14	18.97	1.45968	14	28.36	0.852273	14	33.93
S10A1_HUMAN	Protein S100-A1	10.5	4.2	46.5	1	7.4	8.18	0.662338	4	14.8	1.70968	4	11.58	2.36932	4	7.22
S10A2_HUMAN	Protein S100-A2	11.1	4.5	58.5	2	27.6	536.66	1.28571	2	18.26	0.725806	2	116.4	0.517045	2	86.04
S10A4_HUMAN	Protein S100-A4	11.7	5.8	154.3	3	26.7	11.54	1.24675	10	54.92	0.967742	10	59.88	0.704545	10	7.46
S10A6_HUMAN	Protein S100-A6	10.2	5.2	171.8	4	26.7	13.22	1.03896	24	30.67	1.46774	24	18.06	1.36364	24	35.47
S10A7_HUMAN	Protein S100-A7	11.5	6.4	307.8	6	41.6	15.28	0.597403	25	34.74	0.225806	25	49.82	0.346591	25	41.82
S10A8_HUMAN	Protein S100-A8	10.8	6.6	573.4	14	65.6	12.97	1	74	26.06	0.733871	72	43.19	0.710227	74	32.17
S10A9_HUMAN	Protein S100-A9	13.2	5.7	1136.3	17	85.1	14.12	1.2987	192	45.77	1.01613	197	46.05	0.681818	191	34.07
S10AA_HUMAN	Protein S100-A10	11.2	7.7	155.5	4	40.2	16.17	0.753247	12	46.47	0.959677	12	69.93	1.16477	12	33.6
S10AB_HUMAN	Protein S100-A11	11.7	7.5	242.9	5	42.9	10.01	0.792208	15	49.85	0.612903	15	35.18	0.698864	15	32.09
S10AC_HUMAN	Protein S100-A12	10.6	5.8	163.4	3	38.0	16.42	5.05195	22	70.3	2.70968	23	89.81	0.494318	27	18.9
S12A1_HUMAN	Solute carrier family 12 member 1	121.4	7.8	864.6	22	24.4	11.14	0.246753	64	63.63	0.274194	67	60.6	1.02273	64	42.66
S12A3_HUMAN	Solute carrier family 12 member 3	113.1	9.0	512.9	11	14.5	149.34	0.272727	44	84.09	0.274194	45	66.66	0.903409	44	35.88
S13A3_HUMAN	Solute carrier family 13 member 3	66.8	9.5	57.9	1	2.5	12.02	0.974026	2	66.61	0.524194	2	52.06	0.488636	2	11.66
S14L3_HUMAN	SEC14-like protein 3	46.0	5.7	33	1	2.5	54.95	1.94805	2	1.46	0.83871	2	5.56	0.392045	2	4.1
S14L5_HUMAN	SEC14-like protein 5	78.9	6.1	28.6	1	1.0	32.64	0.909091	2	4.33	4.66129	2	12.59	4.67614	2	8.22
S22A8_HUMAN	Solute carrier family 22 member 8	59.8	9.9	83.5	2	3.7	13.30	0.324675	3	5.55	0.330645	3	10.56	0.914773	3	8.6
S23A1_HUMAN	Solute carrier family 23 member 1	64.8	6.2	33	1	1.7	7.09	0.506494	2	22.92	0.491935	2	24.29	0.880682	2	1.32
S35G4_HUMAN	Solute carrier family 35 member G4	35.4	6.8	31.7	1	2.7	15.73	0.987013	2	0.27	0.540323	2	17.5	0.494318	2	17.77
S36A2_HUMAN	Proton-coupled amino acid transporter 2	53.2	9.3	246.2	4	8.5	13.68	0.532468	21	88.59	0.693548	21	79.24	1.19886	21	24.15
S45A3_HUMAN	Solute carrier family 45 member 3	59.3	8.7	28.5	1	1.4	949.69	1.46753	4	5.22	0.717742	4	4.21	0.443182	4	5.79
S4A4_HUMAN	Electrogenic sodium bicarbonate cotransporter 1	121.4	6.4	111.1	2	3.3	11.69	0.220779	5	25.31	0.266129	5	15.28	1.09659	5	16.84
SAA4_HUMAN	Serum amyloid A-4 protein	14.7	9.8	133.1	3	26.9	14.27	1.23377	9	14	1.97581	9	43.52	1.46023	9	30.25
SAAL1_HUMAN	Protein SAAL1	53.5	4.2	26.4	1	1.5	41.87	1.8961	4	6.27	2.12097	4	5.94	1.02273	4	9.18
SAC2_HUMAN	Phosphatidylinositide phosphatase SAC2	128.3	6.6	113.2	2	1.1	7.53	3.09091	11	93.92	2.04032	11	193.55	0.602273	11	49.7
SACS_HUMAN	Sacsin	520.8	6.7	52.8	2	0.3	799.82	1.22078	3	39.82	0.556452	3	34.08	0.414773	3	6.29
SAE1_HUMAN	SUMO-activating enzyme subunit 1	38.4	5.0	33.3	1	2.3	17.81	4.02597	4	14.67	1.8629	4	9.77	0.420455	4	5.49
SAHH_HUMAN	Adenosylhomocysteinase	47.7	5.9	178.5	5	12.0	11.49	0.519481	14	35.88	0.564516	14	34.44	0.982955	14	29.91
SAM50_HUMAN	Sorting and assembly machinery component 50 homolog	51.9	6.5	78.1	2	4.5	7.36	0.376623	3	46.3	0.524194	3	39.04	1.25568	3	8.28
SAM9L_HUMAN	Sterile alpha motif domain-containing protein 9-like	184.4	9.0	87.5	1	0.4	56.43	2.11688	2	7.69	2.16129	2	7.3	0.931818	2	0.39
SAMP_HUMAN	Serum amyloid P-component	25.4	6.1	329.1	7	28.7	8.69	0.584416	22	46.19	1.04032	22	47.7	1.64205	22	43.66
SAP_HUMAN	Proactivator polypeptide	58.1	4.9	2349.8	39	13.9	49.66	0.428571	228	46.95	0.362903	228	67.57	0.75	222	46.33
SAP3_HUMAN	Ganglioside GM2 activator	20.8	5.0	393.5	8	30.6	10.96	1.66234	59	20.73	2.94355	57	46.57	1.59659	62	44.31
SBNO2_HUMAN	Protein strawberry notch homolog 2	150.2	6.1	27.6	1	0.5	1053.56	0.207792	3	19.57	0.491935	3	18.28	2.13068	3	23.66
SBP1_HUMAN	Selenium-binding protein 1	52.4	5.9	743.5	13	33.5	12.72	0.597403	47	50.78	0.862903	47	56.78	1.3125	47	44.15
SC5A1_HUMAN	Sodium/glucose cotransporter 1	73.4	8.8	115	2	4.5	8.11	0.506494	5	111.32	0.782258	7	48.46	1.51705	5	69.42
SC5A2_HUMAN	Sodium/glucose cotransporter 2	72.8	8.6	37	1	2.2	6.32	0.571429	2	227.85	0.330645	2	2.68	0.528409	2	218.25
SC5A8_HUMAN	Sodium-coupled monocarboxylate transporter 1	66.5	8.8	49.4	1	2.1	5.95	0.402597	4	25.28	0.572581	4	13.87	1.28409	4	17.14
SC5AA_HUMAN	Sodium/glucose cotransporter 5	64.3	8.7	64	1	2.5	6.18	0.155844	4	7.1	0.379032	4	18.89	2.19318	4	21.15
SCML2_HUMAN	Sex comb on midleg-like protein 2	77.2	9.6	53.4	2	1.6	666.43	0.961039	2	1.4	0.733871	2	11.72	0.704545	2	10.31
SCRB2_HUMAN	Lysosome membrane protein 2	54.3	4.9	79.6	1	4.0	313.21	0.805195	2	8.14	0.879032	6	32.75	1.125	2	9.67
SCTM1_HUMAN	Secreted and transmembrane protein 1	27.0	7.9	661.2	10	21.0	13.93	0.87013	203	50.76	1.07258	220	50.28	1.11364	209	51.99
SCYL2_HUMAN	SCY1-like protein 2	103.6	9.2	71.7	2	2.0	15.57	1.20779	6	8.23	0.991935	6	59.5	0.755682	6	52.7
SDCB1_HUMAN	Syntenin-1	32.4	7.9	340.6	7	31.2	15.42	0.805195	39	90.18	0.620968	51	43.14	0.676136	43	47.12
SDK1_HUMAN	Protein sidekick-1	242.0	6.0	70.1	2	0.7	6.60	0.441558	6	23.26	0.677419	6	13.46	1.40909	6	23.58
SDPR_HUMAN	Serum deprivation-response protein	47.1	5.0	28.4	1	1.9	836.21	2.19481	4	13.87	0.879032	4	6.61	0.363636	4	10.54
SE1L1_HUMAN	Protein sel-1 homolog 1	88.7	5.1	51.8	2	2.1	26.51	3.36364	13	36.43	1.76613	12	37.6	0.420455	13	45.44
SE6L2_HUMAN	Seizure 6-like protein 2	97.5	4.7	38.3	1	3.5	158.34	0.415584	3	50.35	0.435484	3	3.05	0.971591	3	50.57
SEM3D_HUMAN	Semaphorin-3D	89.6	8.8	77.9	1	0.8	10.25	0.220779	4	35.86	0.354839	4	13.77	1.50568	4	24.57
SEM4B_HUMAN	Semaphorin-4B	92.1	6.6	115.9	2	3.7	16.72	1.1039	3	19.91	1.1371	3	20.09	0.943182	3	0.17
SEMG1_HUMAN	Semenogelin-1	52.1	9.7	896.4	17	40.9	13.66	1.50649	65	55.93	1.09677	63	64.56	0.659091	67	45.87
SEMG2_HUMAN	Semenogelin-2	65.4	9.6	1440.5	25	46.4	15.59	1.1039	81	43.95	0.645161	81	42.64	0.528409	84	51.62
SEN2_HUMAN	tRNA-splicing endonuclease subunit Sen2	53.2	8.9	27	1	1.7	808.16	1.92208	7	31.76	0.870968	7	16.81	0.414773	7	28.6
SEPR_HUMAN	Seprase	87.7	6.2	60.7	2	2.1	498.67	1.06494	2	73.88	1.5	2	86.83	1.28977	2	8.98
SEPT8_HUMAN	Septin-8	55.7	5.9	52.7	2	3.1	430.54	1.93506	4	19.56	0.91129	4	7.77	0.431818	4	12.79
SERC_HUMAN	Phosphoserine aminotransferase	40.4	8.7	43.3	1	3.2	15.39	0.636364	2	15.47	1.04032	2	0.58	1.47727	2	16.06
SET_HUMAN	Protein SET	33.5	4.1	41.5	1	3.4	459.75	0.961039	2	0.15	1.75	2	11.25	1.66477	2	11.4
SF3A3_HUMAN	Splicing factor 3A subunit 3	58.8	5.1	37	1	2.2	6.12	1.54545	4	16.31	9.68548	4	14.14	5.73295	4	15.97
SFRP1_HUMAN	Secreted frizzled-related protein 1	35.4	10.1	108.5	2	9.2	7.24	1.44156	3	30.79	1.04839	3	12.84	0.670455	3	19.04
SH3L1_HUMAN	SH3 domain-binding glutamic acid-rich-like protein	12.8	5.1	345.2	5	51.8	9.82	2.02597	32	59.74	2.58065	32	78.54	1.16477	32	43.33
SH3L3_HUMAN	SH3 domain-binding glutamic acid-rich-like protein 3	10.4	4.7	427.8	8	66.7	6.10	1.25974	46	23.65	1.65323	45	65.43	1.16477	45	51.43
SH3R2_HUMAN	Putative E3 ubiquitin-protein ligase SH3RF2	79.3	10.9	26	1	0.8	24.45	1.49351	4	22.57	2.15323	4	23.15	1.31818	4	1.04
SHAN1_HUMAN	SH3 and multiple ankyrin repeat domains protein 1	224.8	9.0	63.9	2	0.8	7.14	0.987013	10	61.72	1.72581	10	48.01	1.60227	10	24.87
SHBG_HUMAN	Sex hormone-binding globulin	43.8	6.2	342.2	6	25.4	10.68	1.72727	19	95.98	1.23387	19	81.14	0.619318	26	37.14
SHSA5_HUMAN	Protein shisa-5	25.6	6.4	35.6	1	2.9	5.15	1.14286	3	7.7	1.01613	3	3.59	0.8125	3	6.07
SI1L1_HUMAN	Signal-induced proliferation-associated 1-like protein 1	199.9	9.1	91.6	3	1.4	181.60	1.93506	4	44.7	2.15323	4	124.28	1.01705	4	98.84
SIA7A_HUMAN	Alpha-N-acetylgalactosaminide alpha-2,6-sialyltransferase 1	68.5	10.5	28.8	1	1.2	46.00	0.233766	3	12.39	0.645161	3	6.14	2.5	3	6.57
SIAE_HUMAN	Sialate O-acetylesterase	58.3	7.1	945	17	41.7	15.41	0.74026	70	46.24	1.07258	76	42.11	1.34659	70	60.96
SIAT1_HUMAN	Beta-galactoside alpha-2,6-sialyltransferase 1	46.6	9.8	26.1	1	1.7	67.84	1.7013	2	6.83	2.50806	2	8.05	1.34659	2	1.21
SIRB1_HUMAN	Signal-regulatory protein beta-1	43.2	6.1	415.7	9	17.6	9.02	0.74026	21	31.02	0.879032	21	21.72	1.16477	21	28.85
SIRBL_HUMAN	Signal-regulatory protein beta-1 isoform 3	43.3	8.8	176.2	4	8.8	4.96	0.844156	11	32.89	0.822581	11	13.79	0.892045	11	43.64
SIVA_HUMAN	Apoptosis regulatory protein Siva	18.7	9.5	30.6	1	4.6	34.95	2.44156	3	26.69	8.24194	3	13.45	3.08523	3	13.73
SKIL_HUMAN	Ski-like protein	76.9	6.8	62.7	1	1.2	14.76	4.31169	2	2.45	2.15323	2	3	0.454545	2	5.46
SKOR2_HUMAN	SKI family transcriptional corepressor 2	104.2	6.0	32.8	1	0.8	15.45	6.28571	4	3.08	4.01613	4	4.38	0.585227	4	6.24
SL9A2_HUMAN	Sodium/hydrogen exchanger 2	91.5	9.8	26.8	1	0.9	74.98	1.93506	2	5	26.4194	2	2.54	12.4943	2	7.55
SLAF5_HUMAN	SLAM family member 5	38.8	6.7	193.1	4	17.4	16.37	0.467532	13	30.7	0.725806	13	19.83	1.42614	13	26.57
SLC31_HUMAN	Neutral and basic amino acid transport protein rBAT	78.8	5.6	101.8	2	5.7	14.34	0.571429	6	31.46	1.10484	6	25.54	1.76705	6	15.69
SLIK1_HUMAN	SLIT and NTRK-like protein 1	77.7	6.0	89.1	2	2.9	10.89	1.76623	3	18.81	3.37903	3	3.45	1.75	3	18.63
SLIK4_HUMAN	SLIT and NTRK-like protein 4	94.3	8.9	72.2	1	1.7	7.71	1.06494	2	12	2.27419	2	2.43	1.96023	2	9.56
SLIK6_HUMAN	SLIT and NTRK-like protein 6	95.0	6.1	83.5	2	2.7	28.81	1.25974	4	87.54	0.508065	4	27.42	0.369318	4	79.23
SLIT1_HUMAN	Slit homolog 1 protein	167.8	6.1	35.1	1	0.6	21.06	1.06494	2	39.45	1.45968	2	77.3	1.25568	2	31.12
SLN14_HUMAN	Schlafen family member 14	103.8	9.5	26	1	0.8	1098.29	6.50649	4	39.62	8.19355	4	35.47	1.15341	4	4.06
SMC6_HUMAN	Structural maintenance of chromosomes protein 6	126.2	6.6	62.5	2	1.6	742.80	1.03896	8	46.75	1.23387	8	59.97	1.08523	8	72.93
SMO_HUMAN	Smoothened homolog	86.3	9.8	25.6	1	1.0	4.49	0.337662	2	12.2	0.282258	2	6.16	0.75	2	6.01
SMR3B_HUMAN	Submaxillary gland androgen-regulated protein 3B	8.2	10.2	36.5	1	39.2	8.42	1.27273	2	33.24	0.951613	2	37.94	0.710227	3	5.88
SN12L_HUMAN	Schlafen family member 12-like	70.5	9.2	33.8	1	3.5	426.37	0.506494	6	27.66	1.16935	7	48.35	1.9375	6	62.12
SNAA_HUMAN	Alpha-soluble NSF attachment protein	33.2	5.1	50.9	1	3.7	6.27	0.597403	3	45.12	0.491935	3	9.51	0.75	3	40.7
SODC_HUMAN	Superoxide dismutase [Cu-Zn]	15.9	5.7	335.7	7	62.3	14.14	2.93506	46	51.25	1.67742	46	121.96	0.539773	46	91.52
SODE_HUMAN	Extracellular superoxide dismutase [Cu-Zn]	25.8	6.2	112.9	2	10.0	6.41	0.818182	9	39.41	0.935484	9	9.16	1.05114	9	33.54
SODM_HUMAN	Superoxide dismutase [Mn], mitochondrial	24.7	9.1	197.7	3	18.9	13.05	2.23377	13	71.91	2.25	13	65.01	0.875	14	28.99
SORCN_HUMAN	Sorcin	21.7	5.2	160	4	20.2	10.63	0.779221	9	32.74	0.975806	9	42	1.14773	9	17.61
SORL_HUMAN	Sortilin-related receptor	248.3	5.2	86	2	1.2	15.66	0.337662	3	55.68	0.556452	3	3.13	1.53409	3	53.34
SOS1_HUMAN	Son of sevenless homolog 1	152.4	6.4	30	1	0.8	664.29	2.05195	5	17.11	0.701613	5	11.57	0.3125	5	8.15
SP100_HUMAN	Nuclear autoantigen Sp-100	100.4	9.4	33	1	0.9	3.96	4.02597	2	10.83	2.39516	2	19.79	0.545455	2	8.82
SP16H_HUMAN	FACT complex subunit SPT16	119.8	5.4	83	2	1.5	30.20	0.883117	2	56.29	0.806452	2	11.21	0.840909	2	43.11
SPB13_HUMAN	Serpin B13	44.2	5.4	206.8	3	7.4	17.65	0.285714	14	36.3	0.217742	14	41.51	0.6875	14	31.35
SPB3_HUMAN	Serpin B3	44.5	6.4	1354.6	24	63.8	10.20	0.233766	89	58.74	0.225806	90	70.17	0.875	88	42.01
SPB5_HUMAN	Serpin B5	42.1	5.7	34.9	1	1.9	15.35	1.15584	3	18.2	1.05645	3	4.1	0.840909	3	14.09
SPB6_HUMAN	Serpin B6	42.6	5.0	282.3	6	24.2	10.25	1	13	36.56	0.806452	13	36.5	0.806818	12	26.65
SPG16_HUMAN	Sperm-associated antigen 16 protein	70.8	5.9	58	2	3.0	66.80	2.37662	7	41.56	1.26613	7	41.09	0.488636	7	13.49
SPHM_HUMAN	N-sulphoglucosamine sulphohydrolase	56.7	6.5	499	11	30.5	15.40	0.662338	17	41.8	1.40323	21	40.02	1.73295	18	89.51
SPI2_HUMAN	Serpin I2	46.1	4.9	90.9	2	3.7	13.95	1.71429	6	198.89	1.22581	6	46.71	0.653409	6	169.6
SPIT1_HUMAN	Kunitz-type protease inhibitor 1	58.4	5.9	66.7	2	3.0	37.02	0.818182	4	141.25	1.10484	4	36.01	1.23295	4	80.42
SPRL1_HUMAN	SPARC-like protein 1	75.2	4.6	214.2	4	5.9	13.39	0.441558	15	38.99	0.604839	15	22.94	1.23864	15	50.76
SPRR3_HUMAN	Small proline-rich protein 3	18.1	9.9	288.6	7	37.3	126.36	0.324675	16	63.3	0.193548	16	74.58	0.539773	15	14.03
SPRTN_HUMAN	SprT-like domain-containing protein Spartan	55.1	9.2	26.4	1	2.5	795.01	5.77922	4	26.53	4.23387	4	44.47	0.602273	5	31.71
SPS2_HUMAN	Selenide, water dikinase 2	47.3	5.6	74.5	2	1.6	1047.86	1.23377	9	24.27	1.10484	9	29.78	0.818182	9	6.99
SPTB1_HUMAN	Spectrin beta chain, erythrocytic	246.3	5.0	198.6	4	2.5	17.71	1.5974	10	50.87	2.47581	10	94.01	1.40909	10	82.55
SPTB2_HUMAN	Spectrin beta chain, non-erythrocytic 1	274.4	5.3	429.5	11	4.9	389.12	1.02597	29	60.89	0.645161	31	85.59	0.602273	30	80.03
SPTCS_HUMAN	Spatacsin	278.7	5.6	52.8	2	0.7	19.02	1.96104	3	78.12	1.95161	3	62.99	0.914773	3	11.49
SPTN1_HUMAN	Spectrin alpha chain, non-erythrocytic 1	284.4	5.1	705.1	15	7.9	12.67	1.37662	24	44.79	1.29839	25	79.16	0.931818	26	68.55
SPTN4_HUMAN	Spectrin beta chain, non-erythrocytic 4	288.8	5.7	72.8	2	0.7	14.97	1.4026	5	29.6	1.29839	5	22.22	0.846591	5	14.7
SPXN1_HUMAN	Sperm protein associated with the nucleus on the X chromosome N1	8.3	5.7	50.8	2	30.6	543.17	1.75325	3	11.34	0.91129	3	36.61	0.477273	3	24.59
SRC8_HUMAN	Src substrate cortactin	61.5	5.1	32.6	1	2.2	7.56	1.1039	4	5.33	2.45161	4	4.01	2.02273	4	5.19
SRCN1_HUMAN	SRC kinase signaling inhibitor 1	112.4	9.8	27.7	1	0.8	78.72	1.71429	2	15.42	2.51613	2	52.94	1.34659	2	35.41
SRRM1_HUMAN	Serine/arginine repetitive matrix protein 1	102.3	12.3	71.3	2	1.4	874.83	0.402597	2	69.94	0.427419	2	119.47	0.988636	2	31.83
SRRM2_HUMAN	Serine/arginine repetitive matrix protein 2	299.4	12.6	55.2	2	0.6	665.94	0.636364	3	144.69	1.19355	3	177.04	1.71023	3	24.01
ST14_HUMAN	Suppressor of tumorigenicity 14 protein	94.7	6.1	87.4	2	4.8	18.28	0.727273	5	19.58	0.790323	5	48.49	1	5	41.45
ST1A1_HUMAN	Sulfotransferase 1A1	34.1	6.2	71.4	2	10.2	8.21	1.07792	2	32.38	0.637097	2	55.56	0.539773	2	20.49
STAG1_HUMAN	Cohesin subunit SA-1	144.3	5.3	90.6	2	1.3	972.20	1.55844	3	24.29	3.62903	3	10.57	2.125	3	21.09
STAR9_HUMAN	StAR-related lipid transfer protein 9	516.0	5.9	54.7	2	0.5	969.88	1.37662	2	58.38	0.637097	2	10.05	0.420455	2	46.37
STMN1_HUMAN	Stathmin	17.3	5.7	138.6	4	22.8	15.25	1.37662	8	87.37	1.25806	8	46.61	0.835227	8	49.7
STOM_HUMAN	Erythrocyte band 7 integral membrane protein	31.7	8.9	392.5	7	26.0	8.53	0.623377	15	27.01	0.887097	14	15.26	1.39205	15	28.43
STXB2_HUMAN	Syntaxin-binding protein 2	66.4	6.1	56.4	1	3.0	9.51	0.454545	2	51.22	0.516129	2	15.96	1.03977	2	33.28
SUIS_HUMAN	Sucrase-isomaltase, intestinal	209.3	5.3	570	12	8.1	8.12	0.506494	42	102	0.548387	44	172.5	0.9375	45	70.9
SUMF2_HUMAN	Sulfatase-modifying factor 2	33.8	8.9	27.2	1	2.0	973.65	1.48052	8	12.73	0.669355	8	30.29	0.414773	8	27.35
SUOX_HUMAN	Sulfite oxidase, mitochondrial	60.2	5.7	62.2	1	4.6	23.57	0.415584	6	32.48	0.419355	6	28.62	0.920455	6	35.28
SUSD2_HUMAN	Sushi domain-containing protein 2	90.1	5.8	146.6	4	7.9	15.84	0.428571	9	62.67	0.58871	9	22.93	1.26705	9	39.83
SV421_HUMAN	Histone-lysine N-methyltransferase SUV420H1	99.1	9.8	25.5	1	1.0	955.39	0.701299	4	13.94	0.935484	4	9.39	1.22159	4	4.83
SYAC_HUMAN	Alanine--tRNA ligase, cytoplasmic	106.7	5.2	59.3	2	1.7	521.41	1.42857	3	134.93	1.00806	3	18.88	0.647727	3	100.64
SYCE1_HUMAN	Synaptonemal complex central element protein 1	39.7	5.9	38	1	2.0	1075.81	3.72727	5	7.23	7.46774	5	5.31	1.82955	5	10.26
SYMC_HUMAN	Methionine--tRNA ligase, cytoplasmic	101.1	5.8	25.9	1	0.7	77.93	0.883117	2	8.53	0.33871	2	2.32	0.352273	2	6.2
SYMPK_HUMAN	Symplekin	141.1	5.8	63.8	2	1.0	14.83	4.7013	8	29.07	1.71774	8	33.13	0.335227	8	41.86
SYNC_HUMAN	Asparagine--tRNA ligase, cytoplasmic	62.9	5.9	64.1	1	1.5	5.74	0.207792	3	19.92	0.5	3	13.42	2.13636	3	32.99
SYNE2_HUMAN	Nesprin-2	795.9	5.1	138.1	3	0.6	494.05	1.41558	4	67.13	1.71774	4	83.43	1.11364	4	57.7
SYPL1_HUMAN	Synaptophysin-like protein 1	28.5	9.5	64.6	1	4.2	5.13	0.233766	8	41.38	0.612903	8	11.03	2.42045	8	34.1
SYT16_HUMAN	Synaptotagmin-16	72.2	5.3	53.5	2	1.1	1102.85	0.415584	4	133.57	0.483871	4	57.98	1.0625	4	50.74
SYT4_HUMAN	Synaptotagmin-4	47.9	9.5	25.8	1	1.6	40.66	0.337662	3	1.99	0.540323	3	7.81	1.46591	3	5.83
SYWC_HUMAN	Tryptophan--tRNA ligase, cytoplasmic	53.1	5.8	88.6	2	7.9	11.60	1.27273	3	14.92	2.79032	4	71.91	2.90909	3	21.48
TADBP_HUMAN	TAR DNA-binding protein 43	44.7	5.8	62.3	1	5.8	267.90	0.831169	3	14.28	1.01613	3	10.71	1.125	3	4.27
TAF3_HUMAN	Transcription initiation factor TFIID subunit 3	103.5	9.8	55.9	2	1.8	929.61	2.94805	2	36.51	0.967742	2	26.05	0.301136	2	9.78
TAF7_HUMAN	Transcription initiation factor TFIID subunit 7	40.2	4.9	78.9	2	2.9	294.37	4.44156	5	5.8	2.40323	5	26.75	0.494318	5	23.09
TAF7L_HUMAN	Transcription initiation factor TFIID subunit 7-like	52.6	4.4	84	3	1.5	487.58	4.35065	10	42.18	1.60484	10	75.94	0.335227	10	47.66
TAGAP_HUMAN	T-cell activation Rho GTPase-activating protein	80.7	6.0	26.9	1	1.1	20.39	0.558442	2	2.32	0.895161	2	0.12	1.45455	2	2.44
TAGL_HUMAN	Transgelin	22.6	9.4	91.9	2	9.5	345.09	0.961039	6	27.38	0.620968	6	55.08	0.585227	6	41.3
TAGL2_HUMAN	Transgelin-2	22.4	9.3	320	6	30.2	9.45	1.09091	17	54.8	1.25806	17	50.08	1.05682	17	20.97
TALD3_HUMAN	Protein TALPID3	169.2	5.3	29	1	0.6	49.03	1.88312	2	8.66	1.6129	2	8.3	0.778409	2	0.36
TALDO_HUMAN	Transaldolase	37.5	6.4	572.7	10	26.1	9.32	1.93506	31	21.52	1.10484	32	32.46	0.522727	31	21.06
TB182_HUMAN	182 kDa tankyrase-1-binding protein	181.7	4.6	114.6	2	0.5	724.79	2.55844	5	40.85	1.67742	5	55.9	0.602273	5	13.45
TBA1A_HUMAN	Tubulin alpha-1A chain	50.1	4.8	523	10	27.7	15.01	0.792208	30	46.23	1.01613	31	27.49	1.14773	29	29.81
TBA1C_HUMAN	Tubulin alpha-1C chain	49.9	4.8	539.8	10	27.8	14.56	0.636364	34	63.02	0.951613	34	28.66	1.30114	33	41.07
TBB2A_HUMAN	Tubulin beta-2A chain	49.9	4.6	646.3	13	33.3	10.72	0.532468	46	90.65	0.75	45	32.1	1.38068	45	68.9
TBB4B_HUMAN	Tubulin beta-4B chain	49.8	4.6	710.1	14	35.3	10.71	0.506494	57	79.85	0.814516	57	43.89	1.49432	56	60.77
TBB5_HUMAN	Tubulin beta chain	49.6	4.6	677.6	14	35.4	10.52	0.480519	50	80.47	0.766129	50	37.24	1.48864	48	45.1
TBCA_HUMAN	Tubulin-specific chaperone A	12.8	5.1	72.2	2	17.6	14.08	0.792208	2	19.19	0.91129	2	8.88	1.04545	2	28.43
TBPL1_HUMAN	TATA box-binding protein-like protein 1	20.9	10.5	31.1	1	3.8	1006.24	2.46753	3	33.65	1	3	20.87	0.369318	3	12.51
TCFL5_HUMAN	Transcription factor-like 5 protein	52.7	6.5	30.5	1	1.4	1074.72	2.4026	3	13.41	0.935484	3	15.39	0.357955	3	2.57
TCO2_HUMAN	Transcobalamin-2	47.5	6.6	159.3	2	10.1	16.07	0.883117	2	42.92	0.959677	3	26.43	0.9375	2	11.04
TCPB_HUMAN	T-complex protein 1 subunit beta	57.5	6.0	56.7	2	6.7	262.78	1.25974	3	21.1	0.685484	3	31.6	0.494318	3	53.8
TCPD_HUMAN	T-complex protein 1 subunit delta	57.9	9.0	78.8	1	2.4	20.46	0.597403	4	57.75	1.46774	4	22.41	2.25568	4	63.85
TCPQ_HUMAN	T-complex protein 1 subunit theta	59.6	5.3	39.5	1	1.8	17.80	0.87013	2	5.67	0.919355	2	4.06	0.971591	2	1.61
TCPZ_HUMAN	T-complex protein 1 subunit zeta	58.0	6.2	140.9	3	5.8	7.95	0.350649	7	109.68	0.540323	7	12.51	1.41477	7	91.07
TEFF1_HUMAN	Tomoregulin-1	40.9	6.3	31.5	1	1.8	10.82	0.402597	7	30.34	0.540323	7	6.71	1.22159	7	29.18
TENA_HUMAN	Tenascin	240.7	4.6	314.7	7	6.4	10.72	0.961039	14	60.42	1.1371	13	16.61	1.02273	14	73.27
TENS3_HUMAN	Tensin-3	155.2	6.4	25.1	1	0.4	65.83	4.41558	2	8.52	1.62097	2	7.75	0.335227	2	0.77
TENX_HUMAN	Tenascin-X	464.0	5.1	486.2	11	3.2	7.75	0.584416	23	28.44	0.830645	30	60.44	1.48295	22	48.31
TERA_HUMAN	Transitional endoplasmic reticulum ATPase	89.3	5.0	277.4	6	9.9	6.78	0.597403	18	84.1	0.83871	18	55.05	1.36932	17	35.16
TET2_HUMAN	Methylcytosine dioxygenase TET2	223.7	9.1	25.9	1	0.5	25.72	1.83117	3	9.76	0.733871	3	5.22	0.363636	3	6.25
TETN_HUMAN	Tetranectin	22.5	5.4	333.2	7	24.3	8.31	0.376623	31	49.87	0.596774	31	51.62	1.30682	32	61.91
TEX9_HUMAN	Testis-expressed sequence 9 protein	44.8	6.2	107.8	3	4.6	21.39	0.597403	13	54.45	5.95161	13	364.81	9.06818	13	186.76
TF3C4_HUMAN	General transcription factor 3C polypeptide 4	91.9	6.2	95.2	3	2.2	52.51	1.45455	9	52.54	1.34677	9	42.29	0.846591	9	101.42
TFR1_HUMAN	Transferrin receptor protein 1	84.8	6.2	88	2	3.0	15.83	1.88312	4	28.88	2.04839	4	34.16	1	4	10.27
TGM4_HUMAN	Protein-glutamine gamma-glutamyltransferase 4	77.1	6.3	42.7	1	1.0	5.46	2.22078	4	21.07	2.31452	4	22.02	0.954545	4	3.89
TGM7_HUMAN	Protein-glutamine gamma-glutamyltransferase Z	79.9	6.6	30.3	1	0.8	20.10	1.44156	4	30.8	10.629	4	31.87	6.77273	4	12.44
TGS1_HUMAN	Trimethylguanosine synthase	96.6	4.7	53.1	2	2.7	732.76	0.61039	2	41.01	0.725806	2	22.59	1.09091	2	17.24
THBG_HUMAN	Thyroxine-binding globulin	46.3	5.9	1707.5	28	57.3	12.77	1.31169	282	29.13	0.887097	286	38.4	0.607955	289	35.03
THIL_HUMAN	Acetyl-CoA acetyltransferase, mitochondrial	45.2	9.6	65	1	4.0	12.51	0.987013	4	59.12	0.879032	4	22.73	0.818182	4	52.81
THIO_HUMAN	Thioredoxin	11.7	4.7	65.6	2	23.8	12.48	0.87013	2	75.86	0.91129	2	71.99	0.954545	2	2.81
THRB_HUMAN	Prothrombin	70.0	5.6	667.7	10	21.2	13.39	2.18182	44	35.7	2.12903	42	44.8	1.01705	47	53.25
THTM_HUMAN	3-mercaptopyruvate sulfurtransferase	33.2	6.1	102.3	2	7.4	8.27	1.06494	4	28.44	0.669355	5	30.69	0.659091	4	20.15
THY1_HUMAN	Thy-1 membrane glycoprotein	17.9	9.8	188.1	3	24.2	18.77	0.779221	14	26.96	0.951613	14	32.87	1.11932	14	21.02
TIG1_HUMAN	Retinoic acid receptor responder protein 1	33.3	9.5	121.8	3	7.1	4.06	0.545455	10	38.31	0.741935	10	16.05	1.23864	10	30.29
TIMP1_HUMAN	Metalloproteinase inhibitor 1	23.2	9.8	133.2	3	17.9	17.89	1.5974	11	24.73	1.40323	11	29.82	0.806818	11	23.67
TITIN_HUMAN	Titin	3813.7	6.0	285.8	9	0.3	37.73	1.01299	23	71.64	1.3871	23	131.76	1.40909	22	52.97
TKT_HUMAN	Transketolase	67.8	8.5	908.7	17	37.7	13.55	1.37662	43	53.8	1.43548	43	52.57	0.948864	46	47.86
TLN1_HUMAN	Talin-1	269.6	5.7	540.9	9	5.8	15.01	1.27273	27	57.95	1.6371	29	64.88	1.15909	30	70.42
TM14C_HUMAN	Transmembrane protein 14C	11.6	10.2	59	1	15.2	20.47	0.792208	3	51.91	1.40323	3	25.09	1.63068	3	63.64
TM241_HUMAN	Transmembrane protein 241	32.6	10.0	51.7	2	5.4	323.61	1.98701	5	15.23	1.02419	5	9.35	0.471591	5	10.49
TM256_HUMAN	Transmembrane protein 256	11.7	9.9	346.3	8	30.1	126.10	0.428571	15	78.06	0.5	15	52.44	1.05114	15	45.55
TMC1_HUMAN	Transmembrane channel-like protein 1	87.7	6.2	58.9	2	1.6	11.23	0.74026	10	37.42	13.6694	10	73.66	14.392	11	80.8
TMED7_HUMAN	Transmembrane emp24 domain-containing protein 7	25.2	6.5	80.3	2	5.4	14.99	0.961039	2	2.46	1.08065	2	11.34	1.02273	2	8.87
TMF1_HUMAN	TATA element modulatory factor	122.8	4.7	57.6	2	0.5	12.29	1.8961	3	19.37	6.04839	3	60.78	2.92614	3	38.9
TMPS2_HUMAN	Transmembrane protease serine 2	53.8	9.2	69.8	2	4.9	20.68	1.87013	5	7.62	1.56452	5	76.71	0.767045	5	67.69
TMPS5_HUMAN	Transmembrane protease serine 5	49.5	6.3	32.6	1	2.4	874.64	2.25974	8	19.99	0.927419	8	15.52	0.375	8	21.73
TMX3_HUMAN	Protein disulfide-isomerase TMX3	51.8	4.6	51.2	2	3.5	24.91	0.532468	3	171.39	0.895161	3	59.66	1.53409	3	69.41
TNF12_HUMAN	Tumor necrosis factor ligand superfamily member 12	27.2	10.3	42.2	1	5.6	9.11	0.337662	2	4.39	0.604839	2	3.45	1.625	2	0.94
TOIP1_HUMAN	Torsin-1A-interacting protein 1	66.2	8.9	39.7	1	2.1	7.47	1.19481	2	21.59	1.71774	2	1.71	1.3125	2	23.37
TOM1_HUMAN	Target of Myb protein 1	53.8	4.4	57.3	1	2.6	9.11	0.363636	5	66.36	0.451613	5	32.25	1.125	5	48.81
TPIS_HUMAN	Triosephosphate isomerase	30.8	5.6	978.3	15	58.4	10.91	0.766234	97	40.18	0.830645	95	27.37	1.04545	95	33.51
TPM3_HUMAN	Tropomyosin alpha-3 chain	32.8	4.5	324.5	9	25.0	10.57	1.48052	25	27	1.70968	24	42.74	0.994318	25	45.14
TPM3L_HUMAN	Putative tropomyosin alpha-3 chain-like protein	26.3	4.3	123.9	3	12.6	322.80	1.83117	5	37.42	1.79032	5	108.53	0.897727	5	56.09
TPM4_HUMAN	Tropomyosin alpha-4 chain	28.5	4.5	339.6	9	30.2	9.50	1.12987	19	38.57	1.44355	19	64.22	1.25568	18	33.73
TPP1_HUMAN	Tripeptidyl-peptidase 1	61.2	6.0	557.5	9	21.0	16.50	0.844156	40	35.58	1.1129	51	35.04	1.28977	41	38.56
TPR_HUMAN	Nucleoprotein TPR	267.1	4.8	121.7	4	1.1	866.24	1.71429	4	120.99	2.33065	4	135.25	1.24432	4	81.49
TR19L_HUMAN	Tumor necrosis factor receptor superfamily member 19L	46.1	10.2	78.9	2	2.6	3.97	0.675325	9	39.21	0.862903	9	92.08	1.39773	8	13.44
TRBM_HUMAN	Thrombomodulin	60.3	4.6	109.4	1	3.5	254.37	0.948052	14	87.3	0.774194	19	28.34	0.6875	14	70.67
TRFE_HUMAN	Serotransferrin	77.0	7.0	9323.6	175	75.5	14.22	3.09091	2939	64.18	1.32258	2933	60.54	0.409091	3110	41.83
TRFL_HUMAN	Lactotransferrin	78.1	9.6	1728.1	30	38.2	12.24	1.54545	191	50.45	2.43548	199	86.93	1.47727	206	69.12
TRFM_HUMAN	Melanotransferrin	80.2	5.5	273.2	5	9.3	14.39	0.896104	18	258.22	0.717742	18	85.18	0.732955	18	89.95
TRHDE_HUMAN	Thyrotropin-releasing hormone-degrading ectoenzyme	116.9	6.5	47.6	1	1.6	13.64	0.792208	2	5.26	0.814516	2	24.68	0.9375	2	30.24
TRI36_HUMAN	E3 ubiquitin-protein ligase TRIM36	83.0	5.7	29.4	1	1.4	757.75	0.961039	8	32.8	0.774194	8	14.85	0.738636	8	36.56
TRIPB_HUMAN	Thyroid receptor-interacting protein 11	227.4	5.1	118.1	2	0.9	549.61	1.75325	2	15.4	0.927419	2	41.07	0.488636	2	24.53
TRPM2_HUMAN	Transient receptor potential cation channel subfamily M member 2	171.1	7.6	53.1	2	0.9	581.89	0.467532	2	30.23	0.403226	2	136.41	0.801136	2	83.82
TRPM8_HUMAN	Transient receptor potential cation channel subfamily M member 8	127.6	7.0	55.1	2	0.7	30.84	0.597403	4	51.62	1.22581	4	17.39	1.89205	4	32.53
TRXR1_HUMAN	Thioredoxin reductase 1, cytoplasmic	70.9	7.8	37.7	1	3.5	12.72	0.61039	2	12.86	0.419355	2	11.34	0.619318	2	24.47
TRXR3_HUMAN	Thioredoxin reductase 3	70.7	9.1	42.5	1	1.4	26.63	11.2468	3	57.23	2.91935	3	3.09	0.238636	3	53.86
TRY1_HUMAN	Trypsin-1	26.5	6.1	104.3	2	11.3	9.45	1.48052	17	43.02	0.790323	16	36.39	0.528409	17	10.03
TRY2_HUMAN	Trypsin-2	26.5	4.6	436.2	8	32.0	7.29	1.55844	35	60.93	2.45968	35	61.71	1.44886	35	50.5
TRY3_HUMAN	Trypsin-3	32.5	8.8	217.4	4	9.9	7.77	1.75325	15	30.35	3.00806	15	70.15	1.57386	15	64.9
TS101_HUMAN	Tumor susceptibility gene 101 protein	43.9	6.0	154.1	3	10.5	13.56	0.545455	9	48	0.508065	9	37.78	0.863636	9	18.78
TSC1_HUMAN	Hamartin	129.7	6.0	63.9	2	1.5	31.30	2.02597	3	37.68	1.30645	3	118.46	0.590909	3	62.26
TSN1_HUMAN	Tetraspanin-1	26.3	5.0	43.5	1	5.4	9.20	2.53247	4	8.67	3.8629	4	11.49	1.39773	4	11.39
TSN14_HUMAN	Tetraspanin-14	30.7	6.5	28.5	1	3.0	8.82	4.64935	4	8.61	37.6129	4	11.88	7.40909	4	7.72
TSN8_HUMAN	Tetraspanin-8	26.0	5.4	64.1	1	4.2	4.92	2.32468	2	7.32	1.47581	2	3.49	0.579545	2	3.82
TSP4_HUMAN	Thrombospondin-4	105.8	4.3	71.4	1	1.2	16.97	0.922078	4	12.2	1.23387	4	18.13	1.23295	4	23.9
TTC18_HUMAN	Tetratricopeptide repeat protein 18	125.6	5.5	26.4	1	2.0	385.54	0.454545	3	9	0.387097	3	2.77	0.772727	3	11.37
TTC37_HUMAN	Tetratricopeptide repeat protein 37	175.4	8.1	83.8	3	1.3	20.49	1.05195	3	47.57	1.3871	3	45.24	1.20455	3	98.44
TTC7A_HUMAN	Tetratricopeptide repeat protein 7A	96.1	6.0	102.2	2	1.2	291.11	0.961039	4	59.31	0.403226	4	106.2	0.380682	4	36.34
TTHY_HUMAN	Transthyretin	15.9	5.4	2664.9	39	73.5	12.22	1.61039	316	39.62	1.25806	318	60.36	0.732955	357	46.92
TTL13_HUMAN	Tubulin polyglutamylase TTLL13	93.6	10.0	26.6	1	0.6	13.27	0.714286	7	14.52	2.05645	7	15.95	2.64773	7	16.87
TTLL6_HUMAN	Tubulin polyglutamylase TTLL6	96.3	9.8	64.9	2	0.9	13.36	1.24675	5	31.12	9.8871	5	47.96	7.25	5	33.2
TTLL7_HUMAN	Tubulin polyglutamylase TTLL7	102.9	10.0	59.4	2	0.8	16.71	2.67532	5	26.82	1.55645	5	28.57	0.534091	5	22.78
TTYH3_HUMAN	Protein tweety homolog 3	57.5	5.1	47.4	1	2.7	13.40	0.519481	2	11.52	0.685484	2	16.56	1.19318	2	28.48
TWSG1_HUMAN	Twisted gastrulation protein homolog 1	25.0	5.1	49	1	6.7	3.75	1.12987	6	67.94	1.10484	6	21.4	0.892045	6	44.05
TX101_HUMAN	Testis-expressed sequence 101 protein	26.6	4.8	51.6	1	5.6	7.18	0.714286	4	43.16	0.564516	2	42.79	0.778409	2	46.91
TXD12_HUMAN	Thioredoxin domain-containing protein 12	19.2	5.1	49.2	1	8.7	6.72	0.961039	2	15.32	1	2	13.45	0.943182	2	1.84
TXD17_HUMAN	Thioredoxin domain-containing protein 17	13.9	5.3	62.6	1	8.1	12.65	0.519481	4	8.76	0.66129	4	3.8	1.17045	4	7.97
TXND2_HUMAN	Thioredoxin domain-containing protein 2	60.4	4.7	28.7	1	1.1	996.37	2.09091	2	3.51	0.620968	2	52.61	0.272727	2	48.45
TXND5_HUMAN	Thioredoxin domain-containing protein 5	47.6	5.6	132.6	4	7.9	10.01	0.883117	10	33.89	1.82258	10	60.77	1.90341	10	48
TYPH_HUMAN	Thymidine phosphorylase	49.9	5.2	126.2	2	8.5	299.88	1.62338	3	50.05	1.08871	3	56.03	0.482955	2	25.21
TYRO3_HUMAN	Tyrosine-protein kinase receptor TYRO3	96.8	5.4	45.1	1	1.7	6.17	0.987013	2	0.41	0.814516	2	4.88	0.761364	2	4.47
UB2D3_HUMAN	Ubiquitin-conjugating enzyme E2 D3	16.7	9.0	41.6	1	7.5	14.98	0.766234	4	3.6	1.12903	4	3.65	1.35227	4	2.62
UB2L3_HUMAN	Ubiquitin-conjugating enzyme E2 L3	17.9	9.5	77.9	1	14.3	13.59	2.14286	4	13.2	1.43548	4	11.46	0.613636	4	13.49
UB2V2_HUMAN	Ubiquitin-conjugating enzyme E2 variant 2	16.4	9.0	110.8	2	13.8	6.85	0.948052	7	55.09	1.27419	7	21.13	1.23295	7	73.78
UBA1_HUMAN	Ubiquitin-like modifier-activating enzyme 1	117.8	5.4	432.7	9	12.0	11.72	0.636364	24	52.44	0.725806	23	39.1	1.11932	24	30.03
UBP14_HUMAN	Ubiquitin carboxyl-terminal hydrolase 14	56.0	5.1	105.7	2	6.3	7.80	0.792208	3	21.61	0.733871	3	17.67	0.840909	3	3.97
UBP5_HUMAN	Ubiquitin carboxyl-terminal hydrolase 5	95.7	4.8	56.2	1	2.0	8.02	0.974026	3	31.48	0.733871	3	26.6	0.6875	3	6.31
UBXN4_HUMAN	UBX domain-containing protein 4	56.7	6.1	51.5	1	3.1	15.29	0.662338	2	21.19	0.895161	2	54.44	1.25	2	30.69
UDB15_HUMAN	UDP-glucuronosyltransferase 2B15	61.0	9.6	29	1	2.1	18.05	0.623377	2	8.16	0.403226	2	5.99	0.596591	2	14.2
UEVLD_HUMAN	Ubiquitin-conjugating enzyme E2 variant 3	52.2	6.7	47.8	1	2.1	14.74	0.61039	3	9.48	0.556452	3	7.22	0.823864	3	3.59
UFO_HUMAN	Tyrosine-protein kinase receptor UFO	98.3	5.2	422.2	10	10.0	5.96	0.61039	53	62.54	0.66129	51	54.35	1.04545	53	49.71
UGDH_HUMAN	UDP-glucose 6-dehydrogenase	55.0	6.9	35.4	1	1.8	14.56	0.415584	4	23.7	0.629032	4	19.67	1.39773	4	24.25
UGPA_HUMAN	UTP--glucose-1-phosphate uridylyltransferase	56.9	8.9	231	4	13.0	13.00	0.701299	13	58.75	0.822581	13	36.32	1.07386	13	25.23
UK114_HUMAN	Ribonuclease UK114	14.5	9.4	182	4	33.6	12.58	1.38961	8	34.67	1.45161	8	23.86	0.954545	8	16.87
ULK3_HUMAN	Serine/threonine-protein kinase ULK3	53.4	7.1	100.4	1	3.4	273.74	0.493506	3	62.98	0.306452	3	39.03	0.568182	3	23.42
UN13C_HUMAN	Protein unc-13 homolog C	250.8	5.6	62.2	2	0.5	15.84	1.20779	6	15.26	6.20161	6	55.38	4.67614	6	65.92
UPAR_HUMAN	Urokinase plasminogen activator surface receptor	37.0	6.2	68.5	1	3.9	16.73	1.33766	4	8.98	2.05645	4	3.94	1.40909	4	5.61
UPK3A_HUMAN	Uroplakin-3a	30.7	4.5	47.4	1	3.8	7.57	0.467532	2	31.14	0.435484	2	29.41	0.852273	2	1.62
URM1_HUMAN	Ubiquitin-related modifier 1 homolog	11.4	4.4	90.3	2	19.8	10.95	0.74026	7	49.33	1.8871	7	5.99	2.33523	7	52.69
UROK_HUMAN	Urokinase-type plasminogen activator	48.5	9.9	306.8	6	15.5	12.86	0.558442	23	69.86	0.927419	22	14.5	1.47727	23	65.19
UROM_HUMAN	Uromodulin	69.7	4.9	3224.8	64	36.4	12.19	0.285714	1238	178.67	0.435484	1283	114.24	1.375	1246	79.32
UTER_HUMAN	Uteroglobin	10.0	4.8	807.6	15	54.9	27.20	2.22078	71	37.82	1.70968	68	45.21	0.732955	86	16.13
VASN_HUMAN	Vasorin	71.7	8.0	657.2	12	18.6	8.86	0.337662	84	76.81	0.516129	86	31.59	1.43182	84	50.05
VASP_HUMAN	Vasodilator-stimulated phosphoprotein	39.8	9.7	40.2	1	3.7	243.59	1.33766	4	17.86	2.30645	4	4.08	1.57386	4	20.53
VAT1_HUMAN	Synaptic vesicle membrane protein VAT-1 homolog	41.9	5.9	319.3	5	17.8	293.97	1.05195	8	48.19	0.556452	8	50.97	0.488636	8	92.69
VATA_HUMAN	V-type proton ATPase catalytic subunit A	68.3	5.2	227.9	3	7.0	7.13	0.454545	7	60.37	0.580645	8	39.56	1.16477	7	30.1
VATB2_HUMAN	V-type proton ATPase subunit B, brain isoform	56.5	5.5	95	2	6.1	10.49	0.25974	9	52.04	0.459677	9	27.69	1.67045	9	62.72
VATE1_HUMAN	V-type proton ATPase subunit E 1	26.1	8.8	82.5	2	8.0	3.61	0.519481	3	13.12	0.5	3	6.01	0.880682	3	18.56
VATG1_HUMAN	V-type proton ATPase subunit G 1	13.7	9.7	35.4	1	7.6	7.14	0.298701	4	16.57	0.33871	4	12.43	1.01136	4	8.12
VATH_HUMAN	V-type proton ATPase subunit H	55.8	6.1	49.2	1	3.3	11.17	1.63636	4	16.66	0.903226	4	25.03	0.505682	4	24.75
VCAM1_HUMAN	Vascular cell adhesion protein 1	81.2	5.0	751.4	13	17.1	9.87	1.67532	93	35.72	2.34677	89	42.23	1.36932	92	43.96
VCIP1_HUMAN	Deubiquitinating protein VCIP135	134.2	6.8	204.5	2	1.5	12.41	0.402597	7	98	0.201613	7	138.18	0.454545	7	22.88
VDAC1_HUMAN	Voltage-dependent anion-selective channel protein 1	30.8	9.2	431.4	7	32.9	11.43	0.467532	19	78.01	0.733871	19	33.85	1.46023	19	49.03
VDAC2_HUMAN	Voltage-dependent anion-selective channel protein 2	31.5	8.7	67.8	1	2.7	11.21	0.597403	3	9.81	0.91129	3	9.64	1.39773	3	12.8
VDAC3_HUMAN	Voltage-dependent anion-selective channel protein 3	30.6	9.5	85.7	2	10.6	7.64	0.324675	5	75.5	0.685484	5	27.22	1.93182	5	45.07
VILI_HUMAN	Villin-1	92.6	6.0	488.4	12	17.7	12.89	0.883117	29	48.42	1.07258	28	22.86	1.125	30	37.99
VIME_HUMAN	Vimentin	53.6	4.9	645.7	14	27.0	9.59	1.46753	48	96.76	2.20161	49	96.76	1.39773	50	67.83
VINC_HUMAN	Vinculin	123.7	5.4	240.9	4	7.4	11.07	1.09091	15	76.57	0.822581	18	70.08	0.607955	14	37.42
VIR_HUMAN	Protein virilizer homolog	201.9	4.8	43.3	1	0.8	516.71	0.350649	4	28.32	1.03226	4	14.42	2.75	4	15.61
VMO1_HUMAN	Vitelline membrane outer layer protein 1 homolog	21.5	4.8	415.3	6	42.1	9.25	0.272727	22	95.44	0.508065	22	39.85	1.65909	23	61.44
VNN1_HUMAN	Pantetheinase	57.0	5.2	173.8	4	12.5	252.76	0.636364	8	56.64	0.717742	8	63.24	1.03409	8	51.39
VP13A_HUMAN	Vacuolar protein sorting-associated protein 13A	360.0	5.9	54.2	2	0.6	42.71	1.28571	2	56.81	0.862903	2	36.58	0.613636	2	108.71
VP37B_HUMAN	Vacuolar protein sorting-associated protein 37B	31.3	7.6	70	1	7.0	9.62	1.22078	4	15.52	0.83871	4	8.94	0.625	4	7.24
VPS28_HUMAN	Vacuolar protein sorting-associated protein 28 homolog	25.4	5.2	43.7	1	4.5	12.91	0.532468	2	9.31	0.556452	2	6.09	0.943182	2	3.21
VPS29_HUMAN	Vacuolar protein sorting-associated protein 29	20.5	6.3	115.1	2	7.7	6.21	0.974026	3	19.88	0.701613	3	19.24	0.653409	3	5.85
VPS35_HUMAN	Vacuolar protein sorting-associated protein 35	91.6	5.2	29.2	1	2.0	9.66	1.58442	2	8.63	0.701613	2	27.02	0.403409	2	18.08
VPS4A_HUMAN	Vacuolar protein sorting-associated protein 4A	48.9	8.6	223.3	4	11.2	193.68	0.337662	16	43.15	0.298387	16	34.54	0.880682	15	31.17
VPS4B_HUMAN	Vacuolar protein sorting-associated protein 4B	49.3	6.9	159.4	4	10.4	8.87	0.350649	10	31.13	0.33871	10	35.76	1.02273	9	19.43
VSIG4_HUMAN	V-set and immunoglobulin domain-containing protein 4	44.0	5.9	243	5	15.3	15.06	1.23377	21	20.07	2.12903	22	31.35	1.5	24	34.88
VTA1_HUMAN	Vacuolar protein sorting-associated protein VTA1 homolog	33.9	5.8	80.1	2	5.9	9.34	0.363636	8	28.95	0.427419	8	20.74	1.05114	8	35.46
VTDB_HUMAN	Vitamin D-binding protein	52.9	5.3	2562.5	47	55.5	10.90	1.97403	283	50.6	1.16129	283	85.93	0.579545	306	45.08
VTNC_HUMAN	Vitronectin	54.3	5.5	404.7	7	18.2	12.75	0.818182	46	49.86	1.42742	46	53.25	1.60795	46	55.32
VWF_HUMAN	von Willebrand factor	309.1	5.2	194.2	4	2.2	16.13	0.649351	9	39.16	1.06452	9	19.88	1.51136	9	42.12
WDR1_HUMAN	WD repeat-containing protein 1	66.2	6.2	321.7	6	20.3	15.01	0.688312	14	55.06	0.580645	14	55.13	0.772727	14	37.56
WDR3_HUMAN	WD repeat-containing protein 3	106.0	6.2	27.4	1	0.7	11.81	0.87013	3	27.68	1.39516	3	6.42	1.46591	3	33.7
WISP2_HUMAN	WNT1-inducible-signaling pathway protein 2	26.8	11.3	55	2	2.8	932.62	1.38961	4	15.81	1.65323	4	2.99	1.08523	4	15.44
WRP73_HUMAN	WD repeat-containing protein WRAP73	51.6	6.4	29	1	2.0	22.77	1.11688	8	33.69	1.56452	8	25.57	1.27273	8	25.54
XDH_HUMAN	Xanthine dehydrogenase/oxidase	146.3	8.9	57.9	2	1.2	994.71	1.58442	2	12.3	1.62097	2	36.5	0.9375	2	50.46
XIRP2_HUMAN	Xin actin-binding repeat-containing protein 2	382.1	6.0	112.8	2	0.6	512.18	0.584416	2	92.55	0.467742	2	27.7	0.738636	2	143.73
XPO1_HUMAN	Exportin-1	123.3	5.7	111.6	3	2.2	861.00	0.935065	4	46.51	1.45161	4	18.58	1.42614	4	27.46
XPO2_HUMAN	Exportin-2	110.3	5.4	58.1	1	2.4	10.11	0.87013	2	27.07	0.524194	2	22.47	0.551136	2	4.4
XPP2_HUMAN	Xaa-Pro aminopeptidase 2	75.6	5.6	518.5	9	19.3	64.75	0.441558	28	40.19	0.548387	33	50.46	1.08523	29	30.44
XRCC5_HUMAN	X-ray repair cross-complementing protein 5	82.7	5.5	176.6	3	6.1	18.81	1.27273	3	22.18	0.733871	3	50.63	0.75	2	58.31
XRCC6_HUMAN	X-ray repair cross-complementing protein 6	69.8	6.2	53	2	2.1	689.92	2.45455	2	31.52	1.14516	2	42.77	0.426136	2	82.07
YTDC2_HUMAN	Probable ATP-dependent RNA helicase YTHDC2	160.1	9.5	64.4	1	0.6	19.81	2.66234	2	3.83	1.33871	2	23.72	0.460227	2	27.73
YV020_HUMAN	Putative uncharacterized protein LOC388882	26.9	4.4	54	2	3.3	719.76	2.19481	2	9.15	2.74194	2	13.11	1.14205	2	22.47
Z585A_HUMAN	Zinc finger protein 585A	87.9	10.3	54.7	2	2.6	68.89	0.792208	2	74.96	0.532258	2	54.74	0.619318	2	15.67
ZA2G_HUMAN	Zinc-alpha-2-glycoprotein	34.2	5.7	3773.9	82	71.5	11.01	1.8961	573	44.62	1.90323	578	75.2	0.903409	595	51.71
ZBT38_HUMAN	Zinc finger and BTB domain-containing protein 38	134.2	9.3	30.5	1	0.8	827.13	1.57143	5	52.79	1.16129	5	46.19	0.676136	5	6.41
ZC11A_HUMAN	Zinc finger CCCH domain-containing protein 11A	89.1	9.5	55.6	2	2.3	14.83	0.818182	3	19.62	1.87097	3	78.84	2.10795	3	53.83
ZC3H1_HUMAN	Zinc finger C3H1 domain-containing protein	226.2	9.1	83.5	3	1.3	16.83	2.5974	6	95.37	4	6	93.87	1.40909	6	102.4
ZEP1_HUMAN	Zinc finger protein 40	296.7	8.9	107.8	4	1.3	697.01	3.28571	6	70.75	1.79032	6	73.02	0.5	6	61.86
ZG16_HUMAN	Zymogen granule membrane protein 16	18.2	10.0	121.6	3	24.6	17.93	0.727273	7	88.69	0.516129	7	80.52	0.647727	7	28.84
ZG16B_HUMAN	Zymogen granule protein 16 homolog B	22.7	7.6	60.3	1	4.3	11.67	0.376623	3	2.11	1.08065	3	7.94	2.59091	3	7.55
ZHX1R_HUMAN	Zinc fingers and homeoboxes protein 1, isoform 2	33.3	6.7	25.8	1	3.1	824.60	3.09091	3	16.95	0.975806	3	6.67	0.289773	3	20.62
ZN169_HUMAN	Zinc finger protein 169	68.4	10.6	26.4	1	1.2	56.90	0.987013	7	111.49	1.53226	7	70.77	1.42614	7	31.09
ZN195_HUMAN	Zinc finger protein 195	72.3	9.6	38.5	1	1.1	3.98	8.85714	7	46.27	2.09677	7	43.49	0.215909	7	13.18
ZN236_HUMAN	Zinc finger protein 236	203.6	9.6	29	1	0.7	576.02	0.844156	2	25.17	0.298387	2	11.59	0.323864	2	13.29
ZN438_HUMAN	Zinc finger protein 438	91.8	10.3	26.1	1	1.2	862.80	1.05195	3	1.65	1.25806	3	10.7	1.10227	3	9.04
ZN439_HUMAN	Zinc finger protein 439	58.4	10.3	58.3	2	1.4	655.13	0.454545	2	15.58	1.56452	2	74.86	3.13636	2	98.24
ZN462_HUMAN	Zinc finger protein 462	284.5	8.1	52.2	2	0.4	792.22	1.88312	2	40.71	1.28226	2	7.3	0.625	2	32.7
ZN513_HUMAN	Zinc finger protein 513	57.8	8.7	63.7	1	2.8	51.43	1.53247	4	13.53	4.51613	4	13.57	2.69318	4	17.38
ZN862_HUMAN	Zinc finger protein 862	131.6	7.0	55	2	0.5	49.10	2.31169	7	10.51	1.28226	7	28.41	0.505682	7	35.09
ZNF10_HUMAN	Zinc finger protein 10	66.4	9.7	29.1	1	1.7	681.01	0.987013	2	11.66	0.580645	2	3.93	0.534091	2	7.7
ZSWM6_HUMAN	Zinc finger SWIM domain-containing protein 6	133.4	7.1	29.4	1	0.9	668.41	0.753247	5	13.62	1.45161	5	6.99	1.75568	5	20.51

## Sheet: 2nd iTRAQ results
Supplementary Table 2(b). The list of identified proteins of 2nd iTRAQ experiment.
Accession	Protein	MW [kDa]	pI	Scores	#Peptides	SC [%]	RMS90 [ppm]	Median(CKD/N)	#(CKD/N)	CV [%](CKD/N)	Median(UC/N)	#(UC/N)	CV [%](UC/N)	Median(UC/CKD)	#(UC/CKD)	CV [%](UC/CKD)
1433B_HUMAN	14-3-3 protein beta/alpha	28.1	4.6	796.7	14	43.5	15.68	0.512821	78	48.96	1.48544	81	41.2	3.34419	81	85.12
1433E_HUMAN	14-3-3 protein epsilon	29.2	4.5	736.7	13	43.9	14.20	0.487179	76	45.79	1.48544	77	33.28	3.48372	78	76.73
1433F_HUMAN	14-3-3 protein eta	28.2	4.6	317	7	15.4	16.47	0.461538	60	38.8	1.56311	60	36.58	4.24651	60	63.32
1433G_HUMAN	14-3-3 protein gamma	28.3	4.7	574.1	11	28.3	15.25	0.461538	73	39.86	1.4466	73	39.12	3.84651	73	67.42
1433S_HUMAN	14-3-3 protein sigma	27.8	4.5	608.3	11	49.2	15.30	0.512821	72	50.18	1.4466	73	38.43	3.40465	73	83.43
1433T_HUMAN	14-3-3 protein theta	27.7	4.5	488	8	23.3	16.22	0.461538	63	41.47	1.59223	64	37.83	4.07907	64	65.17
1433Z_HUMAN	14-3-3 protein zeta/delta	27.7	4.6	1039.5	16	53.9	13.81	0.487179	89	52.54	1.66019	90	39.28	3.85581	91	74.01
2AAA_HUMAN	Serine/threonine-protein phosphatase 2A 65 kDa regulatory subunit A alpha isoform	65.3	4.9	70.1	2	4.9	285.22	1.20513	2	129.74	1.63107	2	30.66	1.67907	2	78.63
4F2_HUMAN	4F2 cell-surface antigen heavy chain	68.0	4.7	176.4	4	8.7	14.88	0.564103	11	44.92	0.68932	11	15.05	1.4093	11	61.84
6PGD_HUMAN	6-phosphogluconate dehydrogenase, decarboxylating	53.1	7.0	178.3	2	6.6	20.68	1.28205	10	60.02	2.21359	10	25.5	2.13488	10	59.41
6PGL_HUMAN	6-phosphogluconolactonase	27.5	5.7	708.5	11	57.8	13.20	0.641026	54	79.7	0.631068	60	56.32	1.2186	53	76.3
8ODP_HUMAN	7,8-dihydro-8-oxoguanine triphosphatase	22.5	5.0	164.5	3	20.3	11.25	0.897436	6	22.27	0.640777	6	54.96	0.883721	6	46.62
A1AG1_HUMAN	Alpha-1-acid glycoprotein 1	23.5	4.8	1182	18	53.2	12.67	1.51282	190	22.63	0.932039	191	35.71	0.786047	192	32.27
A1AG2_HUMAN	Alpha-1-acid glycoprotein 2	23.6	4.9	655.3	12	54.2	11.74	0.820513	55	51.32	0.475728	55	60.73	0.739535	57	28.42
A1AT_HUMAN	Alpha-1-antitrypsin	46.7	5.3	6940.4	109	75.8	16.68	7.17949	1803	106.58	4.29126	1803	111.1	0.725581	1795	27.36
A1ATR_HUMAN	Putative alpha-1-antitrypsin-related protein	47.9	8.6	129.4	3	3.3	33.69	1.74359	9	32.31	1.70874	9	31.3	1.20465	9	27.52
A1BG_HUMAN	Alpha-1B-glycoprotein	54.2	5.5	1887.8	28	49.9	19.01	5.64103	366	67.02	2.33981	367	60.65	0.511628	378	36.91
A1CF_HUMAN	APOBEC1 complementation factor	65.2	9.1	35.7	1	1.3	814.58	4.5641	4	27.86	1.97087	4	11.41	0.530233	4	16.16
A2AP_HUMAN	Alpha-2-antiplasmin	54.5	5.9	787	11	31.8	14.18	3.28205	104	48.48	2.53398	106	63.57	0.948837	104	28.8
A2GL_HUMAN	Leucine-rich alpha-2-glycoprotein	38.2	6.5	1704.1	26	66.3	14.00	1.61538	272	52.58	2.3301	280	44.31	1.78605	268	46.22
A2MG_HUMAN	Alpha-2-macroglobulin	163.2	6.0	8663.2	118	63.6	15.98	1.71795	914	68.29	8.59223	962	127.89	6.22791	940	106.37
A2ML1_HUMAN	Alpha-2-macroglobulin-like protein 1	161.0	5.4	1684.9	29	23.0	21.18	0.358974	105	172.08	0.252427	109	187.28	0.827907	107	54.64
A4_HUMAN	Amyloid beta A4 protein	86.9	4.6	113.9	2	1.2	18.69	0.333333	2	5.38	0.203883	2	3.27	0.739535	2	8.66
AACT_HUMAN	Alpha-1-antichymotrypsin	47.6	5.2	3149.9	46	56.5	13.97	4.05128	456	84.77	2.01942	464	64.83	0.595349	453	30.34
AATC_HUMAN	Aspartate aminotransferase, cytoplasmic	46.2	6.6	384.2	7	21.8	11.92	1.35897	30	285.07	1.81553	31	282.98	1.5814	29	56.68
AATM_HUMAN	Aspartate aminotransferase, mitochondrial	47.5	9.8	100.8	2	9.5	7.43	0.717949	6	86.06	3.24272	8	41.2	5.05581	6	59.59
ABCA1_HUMAN	ATP-binding cassette sub-family A member 1	254.1	6.4	28.4	1	0.3	38.21	3.82051	2	29.21	1.1068	2	20.05	0.35814	2	8.78
ABCAD_HUMAN	ATP-binding cassette sub-family A member 13	575.8	6.0	54.6	2	0.4	610.12	2.17949	2	282.03	3.1068	2	242.99	1.73953	2	9.07
ABHEB_HUMAN	Alpha/beta hydrolase domain-containing protein 14B	22.3	5.9	320.9	6	24.8	18.33	1.92308	28	132.99	1.56311	28	116.01	1	28	30.75
ABRAL_HUMAN	Costars family protein ABRACL	9.1	5.8	108.7	1	16.0	13.88	1.5641	14	69.8	2.97087	16	81.8	2.34419	13	26.32
ACBP_HUMAN	Acyl-CoA-binding protein	10.0	6.2	268.2	5	50.6	25.01	0.333333	25	58.71	0.407767	25	38.24	1.45116	25	38.24
ACE_HUMAN	Angiotensin-converting enzyme	149.6	5.9	894.3	16	17.1	12.55	0.794872	59	78.91	2.69903	62	44.87	4.1814	59	92.87
ACE2_HUMAN	Angiotensin-converting enzyme 2	92.4	5.3	598.9	12	20.9	16.45	1.33333	22	78.26	1.59223	28	64.33	1.49767	22	39.46
ACPH_HUMAN	Acylamino-acid-releasing enzyme	81.2	5.2	62.2	1	1.2	17.25	1.05128	3	31.05	0.912621	3	6.18	1.06977	3	27.07
ACSF4_HUMAN	Acyl-CoA synthetase family member 4	122.5	7.0	39.9	1	0.7	21.07	2.87179	12	31.48	1.99029	12	30.14	0.855814	12	11.76
ACTB_HUMAN	Actin, cytoplasmic 1	41.7	5.2	2192.6	33	64.5	14.46	0.769231	224	99	1.40777	217	47.06	2.37674	226	88.64
ACTC_HUMAN	Actin, alpha cardiac muscle 1	42.0	5.1	1045.7	17	30.2	14.91	0.538462	127	66.04	1.29126	129	40.47	2.74884	131	76.12
ACTN1_HUMAN	Alpha-actinin-1	103.0	5.1	1060.4	22	26.8	14.52	0.358974	67	96.5	1.21359	70	43.39	4.02791	67	92.19
ACTN4_HUMAN	Alpha-actinin-4	104.8	5.2	2148	37	51.5	13.95	0.410256	123	83.2	1	129	50.56	2.88837	123	96.49
ACY1_HUMAN	Aminoacylase-1	45.9	5.7	678.6	12	38.0	11.52	0.692308	34	59.09	0.737864	35	32.3	1.28837	34	46.33
ACY3_HUMAN	Aspartoacylase-2	35.2	5.5	84.1	1	5.3	6.65	0.282051	4	27.86	0.203883	4	55.3	0.84186	4	57.65
ADA19_HUMAN	Disintegrin and metalloproteinase domain-containing protein 19	104.9	10.0	56.5	1	0.5	13.47	0.692308	2	17.48	0.601942	2	8.1	1.07907	2	9.28
ADCYA_HUMAN	Adenylate cyclase type 10	187.0	7.1	64.9	1	0.5	33.78	8.89744	7	38.51	2.20388	7	41.02	0.302326	7	24.15
ADEC1_HUMAN	ADAM DEC1	52.7	7.3	131.4	3	9.6	269.26	2.30769	6	143.09	1.36893	6	107.67	0.725581	6	62
ADIPO_HUMAN	Adiponectin	26.4	5.4	398.4	6	22.1	16.41	1.48718	19	43.46	1.28155	19	47.66	1.11163	18	20.32
AFAM_HUMAN	Afamin	69.0	5.6	1878.7	32	50.9	17.11	10.9231	146	96.93	3.01942	148	86.61	0.325581	146	21.53
AGAL_HUMAN	Alpha-galactosidase A	48.7	5.2	176.4	4	12.6	21.77	1.02564	6	30.25	0.92233	7	70.01	0.888372	6	35.13
AGR2_HUMAN	Anterior gradient protein 2 homolog	20.0	9.5	295.4	5	48.6	9.76	1.5641	24	69.09	5.48544	24	92.84	4.29767	24	123.38
AGRIN_HUMAN	Agrin	217.1	6.0	472.6	7	6.5	15.66	1.38462	37	29.03	1.01942	37	31.34	0.916279	37	29.84
AHNK_HUMAN	Neuroblast differentiation-associated protein AHNAK	628.7	5.7	278.2	4	0.6	10.79	0.461538	6	132.73	0.368932	6	107.47	0.995349	6	43.37
AHSP_HUMAN	Alpha-hemoglobin-stabilizing protein	11.8	4.7	95.9	2	20.6	15.89	1.38462	4	23.69	3.81553	4	75.7	3.37209	4	54.02
AK1A1_HUMAN	Alcohol dehydrogenase [NADP(+)]	36.5	6.4	346.3	6	21.2	22.72	0.538462	20	80.04	0.737864	19	38.72	1.62791	19	86.58
AK1BA_HUMAN	Aldo-keto reductase family 1 member B10	36.0	8.7	142	3	8.2	15.60	3.64103	11	108.69	3.16505	11	56.99	1.06047	11	45.31
AK1C3_HUMAN	Aldo-keto reductase family 1 member C3	36.8	9.0	150	2	12.7	20.37	1.02564	2	104.98	1.21359	2	15.3	1.45116	2	80.94
AKAP9_HUMAN	A-kinase anchor protein 9	453.4	4.8	134.2	4	0.7	598.36	1.35897	4	109.21	1.01942	4	41.96	0.930233	4	134.49
AL1A1_HUMAN	Retinal dehydrogenase 1	54.8	6.3	554.5	9	18.8	212.11	0.564103	33	60.67	1.1068	35	43.06	2.29302	32	54.85
ALBU_HUMAN	Serum albumin	69.3	5.9	19332.6	298	91.3	15.33	7.05128	6929	102.2	1.8932	6964	88.18	0.32093	7264	36.87
ALDOA_HUMAN	Fructose-bisphosphate aldolase A	39.4	9.2	1057.5	16	47.5	20.61	0.435897	49	96.85	0.932039	50	67.24	2.7814	49	105.74
ALDOB_HUMAN	Fructose-bisphosphate aldolase B	39.4	9.0	1416	21	45.1	16.76	0.487179	99	63	0.864078	99	45.3	2.11163	101	58.33
ALDR_HUMAN	Aldose reductase	35.8	6.6	144.9	2	9.2	28.74	0.384615	10	31.11	0.669903	10	26.09	2.2	10	33.37
ALS_HUMAN	Insulin-like growth factor-binding protein complex acid labile subunit	66.0	6.4	279	6	14.2	18.73	1.23077	10	48.21	1.65049	10	41.17	1.66047	10	25.97
AMBP_HUMAN	Protein AMBP	39.0	5.9	5019.6	74	63.6	12.66	1.84615	2212	146.54	1.06796	2210	129.09	0.702326	2195	44.95
AMD_HUMAN	Peptidyl-glycine alpha-amidating monooxygenase	108.3	6.0	73.3	2	3.4	17.59	0.820513	3	57.24	0.592233	3	15.01	0.874419	3	39.81
AMPE_HUMAN	Glutamyl aminopeptidase	109.2	5.2	1356	22	25.2	15.16	1.10256	90	58.9	1.71845	91	40.6	1.89767	89	38.07
AMPN_HUMAN	Aminopeptidase N	109.5	5.2	3806.6	56	49.1	12.98	0.564103	469	64.7	1.06796	491	28.61	2.24651	471	63.22
AMY1_HUMAN	Alpha-amylase 1	57.7	6.5	4125.2	59	69.9	12.15	0.384615	450	82.66	0.242718	452	78.69	0.772093	452	38.12
AMY2B_HUMAN	Alpha-amylase 2B	57.7	6.7	4117.4	56	70.6	12.65	0.358974	440	73.52	0.242718	443	67.25	0.795349	435	40.15
AMYP_HUMAN	Pancreatic alpha-amylase	57.7	6.7	4344.2	60	71.8	12.82	0.384615	507	83	0.252427	510	70.56	0.837209	511	45.61
AN18A_HUMAN	Ankyrin repeat domain-containing protein 18A	115.5	8.8	55.3	2	1.4	39.50	0.666667	2	101.61	0.495146	2	82.3	0.902326	2	12.34
AN32A_HUMAN	Acidic leucine-rich nuclear phosphoprotein 32 family member A	28.6	3.8	96.9	1	4.4	13.63	1.87179	2	3.91	2.01942	2	7.24	1.32558	2	3.32
AN36B_HUMAN	Ankyrin repeat domain-containing protein 36B	153.5	9.7	53.3	2	1.3	443.94	0.897436	2	74.05	0.728155	2	45.48	1.0093	2	23.06
ANAG_HUMAN	Alpha-N-acetylglucosaminidase	82.2	6.2	1829.3	25	42.1	11.26	0.358974	196	59.83	0.38835	202	32.19	1.32558	193	46.31
ANF_HUMAN	Natriuretic peptides A	16.7	7.6	58.6	1	5.9	13.04	0.666667	4	28.67	1.01942	5	60.08	1.69302	4	100.6
ANGL2_HUMAN	Angiopoietin-related protein 2	57.1	7.8	506.4	13	26.6	17.14	0.564103	30	45.13	0.873786	30	43.99	1.93488	30	31.24
ANGL3_HUMAN	Angiopoietin-related protein 3	53.6	6.2	163.4	3	6.7	10.23	0.564103	7	48.69	0.631068	7	40.23	1.38605	7	43.92
ANGL6_HUMAN	Angiopoietin-related protein 6	51.7	9.6	74.5	2	5.1	18.60	0.512821	4	45.05	0.912621	4	30.33	2.23721	4	15.01
ANGT_HUMAN	Angiotensinogen	53.1	5.9	1630.2	19	36.3	13.78	2.58974	236	64.99	2.67961	257	67.15	1.25116	257	69.27
ANK3_HUMAN	Ankyrin-3	480.1	6.1	107.5	3	0.6	611.74	3.5641	5	168.12	9.80583	5	12.71	3.38605	5	195.43
ANR12_HUMAN	Ankyrin repeat domain-containing protein 12	235.5	6.6	73.7	2	0.9	23.61	0.974359	2	41.36	0.61165	2	249.65	0.767442	2	133.01
ANR17_HUMAN	Ankyrin repeat domain-containing protein 17	274.1	6.1	72.6	2	0.6	991.48	0.230769	7	269.55	0.407767	7	86.48	2.29302	7	84.43
ANR31_HUMAN	Putative ankyrin repeat domain-containing protein 31	210.7	5.8	60.6	2	0.5	606.05	3.69231	4	69.03	9.72816	4	128.11	3.24186	4	53.89
ANT3_HUMAN	Antithrombin-III	52.6	6.3	2412.4	39	58.4	12.68	6.71795	329	74.06	2.5534	333	67.76	0.469767	331	23.9
ANTR1_HUMAN	Anthrax toxin receptor 1	62.7	8.6	465.2	8	11.9	15.09	1.53846	40	34.84	1.23301	42	39.96	0.962791	40	31.47
ANX11_HUMAN	Annexin A11	54.4	8.5	572.1	10	21.8	15.10	0.307692	41	67.58	0.223301	41	35.45	0.906977	40	40.34
ANX13_HUMAN	Annexin A13	35.4	5.3	138.1	3	9.2	30.49	0.846154	6	168.93	0.514563	6	53.63	0.744186	6	193.43
ANXA1_HUMAN	Annexin A1	38.7	6.7	1954.3	25	59.5	11.97	0.230769	148	72.62	0.15534	150	62.25	0.790698	145	45.75
ANXA2_HUMAN	Annexin A2	38.6	8.5	1884.5	31	72.6	13.56	0.282051	180	87.71	0.223301	183	55.93	1.00465	179	55.87
ANXA3_HUMAN	Annexin A3	36.4	5.5	870.5	17	56.7	10.88	0.384615	56	55.08	0.398058	56	36.17	1.24651	56	43.89
ANXA4_HUMAN	Annexin A4	35.9	5.8	983.7	17	58.6	10.70	0.564103	58	63.56	1.01942	59	27.75	2.17209	59	61.8
ANXA5_HUMAN	Annexin A5	35.9	4.8	991.8	17	53.4	12.71	0.461538	70	52.15	0.398058	73	33.61	1.12093	70	46.52
ANXA6_HUMAN	Annexin A6	75.8	5.3	408.3	8	14.3	11.92	0.589744	18	106.81	0.553398	18	57.75	1.17209	18	57.76
AP2E_HUMAN	Transcription factor AP-2-epsilon	46.2	9.5	29.3	1	1.6	25.15	2.46154	2	4.48	1.47573	2	8.93	0.734884	2	4.44
APLP2_HUMAN	Amyloid-like protein 2	86.9	4.6	183	3	5.0	11.88	0.666667	9	25.25	0.543689	9	47.74	1.02326	9	32.8
APOA_HUMAN	Apolipoprotein(a)	501.0	5.5	42	1	0.4	17.04	0.410256	5	17	0.757282	5	8.31	2.2093	5	16.74
APOA1_HUMAN	Apolipoprotein A-I	30.8	5.5	2853.4	48	74.5	13.61	4.94872	465	98.5	6.86408	466	148.44	1.71628	466	48.29
APOA2_HUMAN	Apolipoprotein A-II	11.2	7.1	627.4	9	69.0	15.47	6.46154	87	74.25	7.2233	88	102.16	1.44186	97	34.41
APOA4_HUMAN	Apolipoprotein A-IV	45.4	5.2	3874	56	75.0	13.26	3.02564	431	82.73	1.38835	433	71.34	0.55814	436	41.13
APOB_HUMAN	Apolipoprotein B-100	515.3	6.6	10005.1	172	44.1	14.90	1.53846	549	80.8	6.14563	577	105.97	4.94419	554	103.19
APOC1_HUMAN	Apolipoprotein C-I	9.3	9.3	186.2	3	24.1	12.99	1.25641	18	54.74	4.18447	18	44.64	4.12093	18	97.21
APOC2_HUMAN	Apolipoprotein C-II	11.3	4.5	267.7	5	49.5	13.40	1.07692	17	45.22	1.43689	19	55.76	1.55814	18	57.79
APOC3_HUMAN	Apolipoprotein C-III	10.8	5.1	160.8	2	27.3	14.97	0.897436	15	16.88	0.854369	15	54.22	1.1814	15	53.33
APOD_HUMAN	Apolipoprotein D	21.3	4.9	1263.5	19	38.1	13.70	0.487179	237	60.15	0.466019	239	35.71	1.22326	237	39.73
APOE_HUMAN	Apolipoprotein E	36.1	5.5	559.3	9	31.5	12.97	0.487179	32	39.71	1.03883	34	43.92	2.28837	34	71.65
APOF_HUMAN	Apolipoprotein F	35.4	5.3	48.8	1	4.0	32.21	1.92308	4	14.66	2.52427	4	24.41	1.60465	4	24.34
APOH_HUMAN	Beta-2-glycoprotein 1	38.3	9.5	1523	24	57.7	17.90	2.10256	317	62.18	1.68932	330	60.18	0.948837	349	45.2
APOL1_HUMAN	Apolipoprotein L1	43.9	5.5	332.7	5	16.3	294.38	1.74359	11	58.2	4.45631	11	73.57	3.11628	11	43.35
APOM_HUMAN	Apolipoprotein M	21.2	5.6	305.1	6	43.1	12.64	1.48718	15	35.13	1.54369	16	23.3	1.28837	15	28.27
AQP1_HUMAN	Aquaporin-1	28.5	7.8	104.9	1	7.4	6.07	0.487179	7	80.63	0.242718	7	45.69	0.609302	7	36.88
AQP2_HUMAN	Aquaporin-2	28.8	6.5	157.4	2	7.7	23.91	0.333333	9	22.26	0.252427	9	15.97	0.934884	9	11.89
ARC1B_HUMAN	Actin-related protein 2/3 complex subunit 1B	40.9	9.8	53.4	2	4.8	626.73	1.23077	4	85.7	1.12621	4	67.79	1.11628	4	32.11
ARF3_HUMAN	ADP-ribosylation factor 3	20.6	7.7	394.5	8	42.0	14.55	0.589744	20	59.77	0.747573	19	39.99	1.68837	20	36.76
ARGAL_HUMAN	Rho guanine nucleotide exchange factor 10-like protein	140.3	5.5	56	2	1.0	52.55	0.538462	2	44.41	4	2	63.09	9.22326	2	15.55
ARHGB_HUMAN	Rho guanine nucleotide exchange factor 11	167.6	5.2	28.5	1	0.5	1003.85	0.384615	2	57.88	0.252427	2	20.86	0.804651	2	34.04
ARIP4_HUMAN	Helicase ARIP4	162.7	5.7	57.1	2	1.2	508.51	0.307692	3	5.08	0.281553	3	13.1	1.13023	3	11.21
ARMC8_HUMAN	Armadillo repeat-containing protein 8	75.5	6.3	27.2	1	1.8	12.59	11.6667	4	32.42	2.86408	4	30.3	0.302326	4	17.39
ARP2_HUMAN	Actin-related protein 2	44.7	6.3	72.2	2	4.3	1092.33	0.923077	2	9.74	1.18447	2	5.22	1.55814	2	15.01
ARP3_HUMAN	Actin-related protein 3	47.3	5.5	126.4	3	10.8	8.09	0.564103	7	112.15	1.34951	8	27.21	3.02791	7	85.12
ARPC2_HUMAN	Actin-related protein 2/3 complex subunit 2	34.3	7.0	45.9	1	4.0	13.15	1	2	3.72	0.825243	2	3.78	1.00465	2	0.06
ARPC3_HUMAN	Actin-related protein 2/3 complex subunit 3	20.5	9.5	42.2	1	6.2	2.11	0.512821	2	78.79	1.19417	2	21.75	2.85581	2	50.89
ARRS_HUMAN	S-arrestin	45.1	6.1	35.4	1	2.7	696.58	0.641026	8	60.1	0.572816	8	62.27	1.08837	8	15.31
ARSA_HUMAN	Arylsulfatase A	53.6	5.6	802.9	11	22.5	16.62	0.487179	70	38.66	0.446602	71	33.97	1.09767	72	33.27
ARSB_HUMAN	Arylsulfatase B	59.6	9.2	58.1	2	3.9	27.84	1.87179	2	40.62	1.3301	2	72.67	0.869767	2	26.48
ARSF_HUMAN	Arylsulfatase F	65.9	6.9	58.1	1	1.9	13.89	0.538462	2	6.03	0.339806	2	6.56	0.8	2	0.53
ASAH1_HUMAN	Acid ceramidase	44.6	8.6	1015.7	18	43.0	19.45	0.871795	99	30.58	0.640777	99	27.51	0.930233	101	37.26
ASGR2_HUMAN	Asialoglycoprotein receptor 2	35.1	5.8	259.7	4	18.6	22.25	1.25641	11	62.24	0.941748	11	61.32	0.925581	11	39.44
ASH1L_HUMAN	Histone-lysine N-methyltransferase ASH1L	332.6	10.1	88.6	2	0.4	7.56	1.12821	12	79.6	1.62136	12	61.69	1.74884	12	29.21
ASPG_HUMAN	N(4)-(beta-N-acetylglucosaminyl)-L-asparaginase	37.2	5.8	104.7	2	12.4	11.86	0.692308	8	24.5	0.679612	8	35.36	1.20465	8	45.27
ASPM_HUMAN	Abnormal spindle-like microcephaly-associated protein	409.5	11.2	50.9	1	0.1	974.48	7.71795	2	26.28	2.1165	2	38.17	0.334884	2	11.07
ASSY_HUMAN	Argininosuccinate synthase	46.5	8.9	185.8	4	10.2	14.25	0.846154	9	35.85	0.76699	9	42.9	1.11628	9	26.85
ASXL3_HUMAN	Putative Polycomb group protein ASXL3	241.8	5.8	57.3	2	0.6	646.98	0.461538	2	19.5	0.407767	2	64.49	1.06047	2	41.27
AT10B_HUMAN	Probable phospholipid-transporting ATPase VB	165.3	6.5	58	2	0.9	33.28	1.02564	4	74.88	0.708738	4	36.66	0.851163	4	33.43
AT1A1_HUMAN	Sodium/potassium-transporting ATPase subunit alpha-1	112.8	5.2	34.2	1	1.0	6.80	0.384615	3	32.09	0.68932	3	15.94	2.1814	3	35.81
AT1A2_HUMAN	Sodium/potassium-transporting ATPase subunit alpha-2	112.2	5.4	27.6	1	1.4	622.12	2.25641	3	13.49	0.495146	3	10.48	0.274419	3	2.98
ATNG_HUMAN	Sodium/potassium-transporting ATPase subunit gamma	7.3	9.2	82.9	1	21.2	7.59	0.307692	6	52.26	0.126214	6	83.56	0.525581	6	31.23
ATPB_HUMAN	ATP synthase subunit beta, mitochondrial	56.5	5.1	210.5	3	8.3	11.39	0.74359	11	71.92	2.47573	11	39.85	4.13953	11	87.57
ATRN_HUMAN	Attractin	158.4	7.9	925.9	17	13.8	20.92	0.692308	66	42.63	0.339806	67	50.47	0.604651	66	29.64
ATS1_HUMAN	A disintegrin and metalloproteinase with thrombospondin motifs 1	105.3	6.4	193.5	2	5.3	12.28	1.25641	15	40.65	1.13592	15	20.09	1.10698	15	27.93
ATX2_HUMAN	Ataxin-2	140.2	10.2	64.4	2	1.0	549.10	0.717949	4	143.3	0.475728	4	15.31	0.804651	4	114.92
AVIL_HUMAN	Advillin	92.0	5.4	59.6	2	1.3	53.58	2.02564	3	340.17	0.737864	3	82.07	0.451163	3	125.05
B2MG_HUMAN	Beta-2-microglobulin	13.7	6.1	2080.3	32	66.4	15.28	2.71795	460	78.69	4.41748	474	113.76	2.11163	460	49.79
B3AT_HUMAN	Band 3 anion transport protein	101.7	4.9	322.7	6	8.5	13.97	1.46154	20	41.04	4.13592	22	58.87	3.31163	19	30.06
B4GT1_HUMAN	Beta-1,4-galactosyltransferase 1	43.9	9.6	171.4	3	9.5	24.39	0.74359	8	48.27	0.786408	9	25.18	1.33023	8	33.18
BABA1_HUMAN	BRISC and BRCA1-A complex member 1	36.5	4.5	31.6	1	2.4	1201.32	0.333333	2	27.44	0.184466	2	13.13	0.67907	2	41.67
BASI_HUMAN	Basigin	42.2	5.3	48.7	1	3.6	17.60	0.717949	3	4.83	0.407767	3	4.22	0.683721	3	4.91
BCAM_HUMAN	Basal cell adhesion molecule	67.4	5.5	276.9	4	9.6	10.79	0.615385	9	44.48	0.417476	9	41.82	0.832558	9	29
BCAR1_HUMAN	Breast cancer anti-estrogen resistance protein 1	93.3	5.3	61.3	2	1.7	856.16	3.10256	5	66.86	22.9029	5	22.74	9.09767	5	90.12
BDH2_HUMAN	3-hydroxybutyrate dehydrogenase type 2	26.7	8.9	108.5	2	11.0	20.04	0.461538	2	13.33	0.417476	2	13.31	1.12093	2	27
BGAL_HUMAN	Beta-galactosidase	76.0	6.1	879.5	14	23.9	20.24	0.74359	82	36.8	0.349515	83	54.35	0.572093	82	32.09
BGH3_HUMAN	Transforming growth factor-beta-induced protein ig-h3	74.6	8.6	195.2	4	11.0	19.65	2.02564	8	48.84	2.16505	9	78.22	1.44651	8	86.79
BGLR_HUMAN	Beta-glucuronidase	74.7	6.6	759.5	14	24.6	15.75	0.666667	85	64.52	0.572816	88	47.27	1.12558	82	46.23
BHMT1_HUMAN	Betaine--homocysteine S-methyltransferase 1	45.0	6.7	529.5	10	29.6	14.73	0.435897	30	52.8	0.417476	30	30.86	1.16744	30	41.54
BID_HUMAN	BH3-interacting domain death agonist	22.0	5.1	356.9	6	41.0	9.71	0.74359	20	51.46	0.38835	20	35.5	0.637209	20	32.53
BLVRB_HUMAN	Flavin reductase (NADPH)	22.1	7.9	377.7	7	45.6	11.99	1.20513	15	58.41	2.03883	15	15.87	2.07442	15	63.97
BPTF_HUMAN	Nucleosome-remodeling factor subunit BPTF	338.1	6.1	143.5	4	0.9	512.03	2.25641	6	215.38	1.50485	6	196.46	0.818605	6	92.41
BRD4_HUMAN	Bromodomain-containing protein 4	152.1	9.8	81	3	1.1	646.08	1.61538	5	99.69	2.25243	5	144.6	1.70698	5	46.5
BROX_HUMAN	BRO1 domain-containing protein BROX	46.4	8.5	359.4	6	18.2	22.08	0.384615	11	68.54	0.242718	11	48.58	0.795349	11	41.08
BST1_HUMAN	ADP-ribosyl cyclase 2	35.7	9.1	207.5	4	18.6	22.31	1.61538	6	128.93	1.12621	6	128.42	0.865116	6	23.54
BT2A1_HUMAN	Butyrophilin subfamily 2 member A1	59.6	6.1	241.3	5	6.6	23.67	0.692308	26	47.65	0.339806	25	31.1	0.632558	26	30.19
BTD_HUMAN	Biotinidase	61.1	5.8	831.7	11	23.0	13.67	1.23077	117	37.94	0.631068	119	41.67	0.613953	117	34.02
BY55_HUMAN	CD160 antigen	19.8	7.9	54.9	1	6.1	15.92	0.769231	2	0.3	0.291262	2	1.12	0.465116	2	0.83
C1QB_HUMAN	Complement C1q subcomponent subunit B	26.7	9.6	178.3	3	18.2	16.50	0.410256	8	190.88	3	10	63.85	8.06047	7	123.56
C1QC_HUMAN	Complement C1q subcomponent subunit C	25.8	9.4	169.8	4	21.2	12.44	0.897436	17	92.68	5.67961	16	64.21	6.86047	17	115.53
C1QR1_HUMAN	Complement component C1q receptor	68.5	5.2	101.7	2	4.4	22.38	1.15385	4	53.33	1.20388	4	32.96	1.28837	4	18.56
C1R_HUMAN	Complement C1r subcomponent	80.1	5.8	447.3	9	18.6	23.20	0.820513	25	82.59	1.90291	27	138.3	2.91163	25	106.88
C1RL_HUMAN	Complement C1r subcomponent-like protein	53.5	6.9	798.3	10	18.5	16.56	0.641026	66	50.04	0.456311	68	45.91	0.869767	67	48.8
C1S_HUMAN	Complement C1s subcomponent	76.6	4.7	804.5	15	23.7	11.60	1.20513	43	59.77	2.48544	43	67.79	2.51628	43	44.78
C2TA_HUMAN	MHC class II transactivator	123.4	5.2	31.4	1	0.7	15.39	2.69231	4	54.6	1.73786	4	22.37	0.790698	4	29.7
C4BPA_HUMAN	C4b-binding protein alpha chain	67.0	7.9	253.5	6	14.4	14.86	1.10256	14	99.23	3.39806	14	53.71	3.76744	14	64.6
CA123_HUMAN	UPF0587 protein C1orf123	18.0	4.8	77.7	2	20.6	12.89	2.15385	3	22.43	3.1165	3	19.19	1.78605	3	3.35
CAB39_HUMAN	Calcium-binding protein 39	39.8	6.5	110.8	3	6.7	575.33	1.4359	6	244.48	0.553398	6	59.61	0.474419	6	103.38
CAB45_HUMAN	45 kDa calcium-binding protein	41.8	4.6	80.6	1	3.3	8.95	0.307692	3	30.52	0.194175	3	19.45	0.818605	3	10.6
CAD11_HUMAN	Cadherin-11	87.9	4.6	891.4	13	20.5	14.16	0.794872	47	25.29	0.349515	48	30.77	0.530233	49	31.36
CAD13_HUMAN	Cadherin-13	78.2	4.7	988	14	19.4	13.08	0.923077	137	28.74	0.485437	139	33.55	0.651163	138	24.87
CAD15_HUMAN	Cadherin-15	88.9	4.7	129.9	1	2.1	10.93	1.5641	5	28.89	0.0485437	5	33.88	0.0418605	5	17.63
CAD16_HUMAN	Cadherin-16	89.9	4.7	48.1	1	1.6	33.72	0.846154	2	29.89	0.466019	2	8.87	0.683721	2	39.53
CAD19_HUMAN	Cadherin-19	86.9	4.5	73.3	2	2.1	779.53	2.28205	4	74.86	2.30097	4	255.3	1.23721	4	92.28
CADH1_HUMAN	Cadherin-1	97.4	4.4	1384	20	23.1	13.64	1.25641	152	29.04	0.68932	151	30.99	0.665116	151	22.01
CADH2_HUMAN	Cadherin-2	99.7	4.5	1133.2	16	24.0	12.49	0.74359	93	30.34	0.485437	96	37.1	0.786047	94	33.14
CADH3_HUMAN	Cadherin-3	91.4	4.5	146.6	2	3.0	16.19	1.15385	8	21.78	0.61165	8	18.15	0.64186	8	10.84
CADH5_HUMAN	Cadherin-5	87.5	5.1	128.5	2	3.2	31.78	1.48718	5	19.47	1.09709	5	26.38	0.902326	5	34.28
CADH6_HUMAN	Cadherin-6	88.3	4.6	256.8	6	6.8	14.43	0.717949	13	31.9	0.339806	13	48.53	0.539535	12	21.38
CADM1_HUMAN	Cell adhesion molecule 1	48.5	4.8	524.4	9	29.0	15.76	0.820513	31	60.77	0.417476	31	45.77	0.613953	31	34.35
CADM3_HUMAN	Cell adhesion molecule 3	43.3	5.7	268.8	4	11.1	19.32	1.17949	16	45.29	1.07767	16	46.55	1.11163	16	40.08
CADM4_HUMAN	Cell adhesion molecule 4	42.8	5.9	413.3	6	19.3	10.87	0.641026	57	37.9	0.281553	56	28.66	0.534884	58	22.81
CAH1_HUMAN	Carbonic anhydrase 1	28.9	6.7	1878.2	27	68.2	13.38	1.92308	269	56.9	6.68932	275	105.05	4.41395	270	60.7
CAH2_HUMAN	Carbonic anhydrase 2	29.2	7.0	838.7	13	50.4	14.28	0.487179	94	68.29	2.2233	99	28.07	5.93488	93	71.59
CAH3_HUMAN	Carbonic anhydrase 3	29.5	7.1	607.6	11	54.2	9.34	1.66667	33	93.1	1.72816	38	56.46	1.46512	35	85.56
CALB1_HUMAN	Calbindin	30.0	4.6	510.5	8	36.4	13.30	0.307692	22	61.97	0.194175	21	31.54	0.823256	23	58.06
CALL3_HUMAN	Calmodulin-like protein 3	16.9	4.1	743.3	12	78.5	11.66	0.179487	47	66.58	0.126214	49	107.14	0.855814	48	59.55
CALL5_HUMAN	Calmodulin-like protein 5	15.9	4.1	134.3	2	18.5	11.19	0.410256	6	27.87	0.330097	6	26.92	1.01395	6	9.98
CALM_HUMAN	Calmodulin	16.8	3.9	953.3	15	77.2	13.02	0.487179	55	39.34	0.776699	57	60.83	1.92093	56	60.68
CALR_HUMAN	Calreticulin	48.1	4.1	1031.5	16	48.2	17.72	1.58974	69	46.1	2.34951	71	40.03	1.90698	69	42.22
CALX_HUMAN	Calnexin	67.5	4.3	131.7	3	6.1	18.05	1.17949	10	36.72	0.970874	10	26.34	1.00465	10	16.37
CAMP_HUMAN	Cathelicidin antimicrobial peptide	19.3	10.3	110.6	3	19.4	13.48	0.589744	10	54.29	0.747573	10	19.98	1.57209	10	76.1
CAN1_HUMAN	Calpain-1 catalytic subunit	81.8	5.4	182.5	3	5.5	11.26	0.538462	6	40.57	0.718447	6	12.27	1.65581	6	30.67
CAN5_HUMAN	Calpain-5	73.1	8.5	49.4	1	2.3	6.93	0.589744	3	94.04	0.504854	3	44.44	1.04186	3	39.28
CAN7_HUMAN	Calpain-7	92.6	8.3	252.3	5	5.5	18.93	0.333333	11	14.59	0.252427	12	35.1	0.846512	12	22.98
CAP1_HUMAN	Adenylyl cyclase-associated protein 1	51.9	9.1	325.8	6	16.6	15.23	1.48718	19	84.48	1.73786	19	25.88	1.44651	19	69.88
CAP7_HUMAN	Azurocidin	26.9	11.9	225.1	4	32.7	9.91	0.692308	7	54.3	2.64078	10	59.85	4.70233	8	78.48
CAPG_HUMAN	Macrophage-capping protein	38.5	5.8	414.5	8	29.0	19.19	0.564103	23	102.4	0.834951	23	65.02	1.7907	23	38.12
CAPZB_HUMAN	F-actin-capping protein subunit beta	31.3	5.2	90.2	2	9.7	33.12	1	4	102.29	1.07767	5	57.98	1.42791	4	71.45
CASPE_HUMAN	Caspase-14	27.7	5.3	222.4	3	17.8	18.37	0.333333	6	62.39	0.300971	6	36.27	1.12093	6	43.13
CATA_HUMAN	Catalase	59.7	7.0	1510.3	24	53.9	7.89	0.897436	78	68.5	3.31068	80	66.68	4.4093	79	130.48
CATB_HUMAN	Cathepsin B	37.8	5.9	765.5	14	30.7	12.97	0.974359	65	30.67	0.446602	65	46.82	0.55814	65	29.11
CATC_HUMAN	Dipeptidyl peptidase 1	51.8	6.6	1023.9	16	36.1	18.60	1.35897	86	64.62	0.76699	84	58.91	0.725581	86	33.75
CATD_HUMAN	Cathepsin D	44.5	6.1	1131	16	42.0	13.36	1.15385	192	30.34	1.18447	196	29.97	1.26977	193	24.78
CATG_HUMAN	Cathepsin G	28.8	12.1	263.6	5	27.5	10.45	0.615385	11	76.38	2.29126	12	208.89	4.96744	11	102.37
CATH_HUMAN	Pro-cathepsin H	37.4	9.3	445.2	7	25.7	11.96	1.38462	28	51.15	1.04854	31	52.84	0.911628	27	33.42
CATL1_HUMAN	Cathepsin L1	37.5	5.2	189.2	3	8.4	10.93	1.46154	8	31.83	0.728155	8	39.98	0.613953	8	45.78
CATS_HUMAN	Cathepsin S	37.5	9.4	93.2	2	7.9	16.36	1.48718	4	12.69	1.33981	4	45.58	1.10698	4	32.67
CATZ_HUMAN	Cathepsin Z	33.8	6.9	262.8	6	21.5	14.01	1.64103	49	28.96	1	49	28.07	0.739535	48	19.69
CAZA1_HUMAN	F-actin-capping protein subunit alpha-1	32.9	5.4	206.8	3	18.2	37.59	0.564103	12	42.89	1.04854	12	25.47	2.01395	12	68.45
CAZA2_HUMAN	F-actin-capping protein subunit alpha-2	32.9	5.5	77.7	2	11.2	42.98	0.641026	6	48.92	1.06796	7	16.91	1.90698	6	47.74
CBG_HUMAN	Corticosteroid-binding globulin	45.1	5.6	937.6	16	39.0	15.86	3.53846	169	39.68	1.43689	168	25.65	0.488372	167	26.37
CBPE_HUMAN	Carboxypeptidase E	53.1	4.9	285.2	7	13.0	12.31	0.538462	20	48.87	0.368932	20	54.29	0.832558	20	40.11
CBPM_HUMAN	Carboxypeptidase M	50.5	7.1	666.7	13	32.3	17.31	0.333333	49	39.08	0.242718	52	72.07	0.874419	51	42.28
CBPN_HUMAN	Carboxypeptidase N catalytic chain	52.3	7.0	96.9	1	3.3	5.83	1.20513	3	26.48	4.84466	3	69.98	4.89302	3	40.05
CBPQ_HUMAN	Carboxypeptidase Q	51.9	5.8	677.3	10	24.4	20.66	0.974359	67	30.59	0.737864	68	49.4	0.865116	66	44.08
CBPZ_HUMAN	Carboxypeptidase Z	73.6	9.2	30.1	1	1.5	10.93	0.769231	4	29.12	0.893204	4	8.44	1.41395	4	28.87
CBR1_HUMAN	Carbonyl reductase [NADPH] 1	30.4	9.5	292.9	5	23.1	16.59	0.358974	12	79.92	0.796117	12	21.32	2.71163	12	68.95
CC168_HUMAN	Coiled-coil domain-containing protein 168	277.8	10.0	113.1	3	1.5	477.46	1.10256	4	204.46	0.407767	4	142	0.451163	4	26.29
CC170_HUMAN	Coiled-coil domain-containing protein 170	82.2	6.2	56.3	1	1.4	827.96	22.4615	4	40.23	15.6796	4	37.85	0.855814	4	15.42
CC176_HUMAN	Coiled-coil domain-containing protein 176	61.9	9.6	30	1	1.9	7.01	4.48718	2	8.8	1.76699	2	4.77	0.483721	2	4.02
CCD37_HUMAN	Coiled-coil domain-containing protein 37	71.1	6.7	28.6	1	0.8	36.56	1.94872	5	9.33	2.73786	5	17.52	1.71628	5	18.3
CCD57_HUMAN	Coiled-coil domain-containing protein 57	103.1	6.1	70.6	2	1.6	16.04	0.205128	6	134.66	0.320388	6	102.44	1.82791	6	27.38
CCD68_HUMAN	Coiled-coil domain-containing protein 68	38.8	9.5	62	2	3.0	9.93	0.538462	6	5.38	0.980583	6	21.23	2.27442	6	17.53
CCD69_HUMAN	Coiled-coil domain-containing protein 69	34.8	5.5	41.6	1	2.7	11.30	3.92308	6	9.93	2.90291	6	13.57	0.906977	6	5.54
CCD78_HUMAN	Coiled-coil domain-containing protein 78	48.5	9.3	60.9	1	1.4	31.10	0.974359	3	10.57	0.23301	3	15.07	0.293023	3	6.52
CD14_HUMAN	Monocyte differentiation antigen CD14	40.1	5.8	1375.4	16	45.6	18.37	0.692308	339	66.46	0.631068	354	50.47	1.16279	337	50.66
CD177_HUMAN	CD177 antigen	46.3	5.9	85.4	2	3.9	5.85	0.333333	8	43.73	0.339806	8	35.52	1.2186	8	41.13
CD248_HUMAN	Endosialin	80.8	5.1	483.3	10	13.2	16.21	0.461538	89	48.71	0.262136	88	40.12	0.711628	89	21.26
CD276_HUMAN	CD276 antigen	57.2	4.6	118.5	1	3.4	3.05	0.641026	5	42.44	0.747573	5	26.42	1.43256	5	22.54
CD44_HUMAN	CD44 antigen	81.5	5.0	613	8	8.9	11.68	0.25641	79	52.5	0.15534	80	76.29	0.632558	77	42.41
CD59_HUMAN	CD59 glycoprotein	14.2	6.1	330.2	6	25.0	19.36	0.358974	54	83.15	0.203883	53	107.11	0.72093	53	35.52
CD5L_HUMAN	CD5 antigen-like	38.1	5.2	350.9	7	21.9	9.51	1.23077	17	89.3	2.2233	18	60.21	2.17674	17	132.52
CD7_HUMAN	T-cell antigen CD7	25.4	7.8	115.4	2	9.6	12.89	0.717949	7	10.8	0.427184	7	49.63	0.748837	7	42.28
CD9_HUMAN	CD9 antigen	25.4	7.7	62.6	1	4.4	13.24	0.410256	9	34.16	0.242718	9	17.67	0.693023	9	18.54
CDC42_HUMAN	Cell division control protein 42 homolog	21.2	6.2	47.6	1	5.8	10.29	0.794872	2	6	0.533981	2	0.05	0.818605	2	6.05
CDD_HUMAN	Cytidine deaminase	16.2	7.5	67.8	1	14.4	2.93	0.846154	3	40.11	1.25243	3	15.33	1.83721	3	31.69
CDHR2_HUMAN	Cadherin-related family member 2	141.5	4.2	590.8	11	11.2	11.00	1.15385	44	44.91	0.815534	43	41.82	0.84186	42	22.09
CDHR5_HUMAN	Cadherin-related family member 5	88.2	4.7	278.1	5	10.1	23.87	0.358974	16	102.96	0.533981	18	25.09	1.8	16	96.52
CE060_HUMAN	Putative uncharacterized protein C5orf60	39.2	10.5	52.9	2	1.4	34.52	2.41026	2	12.46	2.16505	2	16.53	1.10698	2	4.01
CE290_HUMAN	Centrosomal protein of 290 kDa	290.2	5.7	61.1	1	0.5	31.10	0.820513	4	36.84	11.3107	4	18.22	16.7116	4	54.73
CEAM7_HUMAN	Carcinoembryonic antigen-related cell adhesion molecule 7	29.4	5.3	30.1	1	3.4	24.08	0.794872	3	15.71	1.38835	3	19.31	2.12558	3	33.27
CEL_HUMAN	Bile salt-activated lipase	79.3	5.0	485.8	9	14.9	25.70	0.512821	34	64.31	0.38835	35	47.58	0.962791	34	40.31
CENPE_HUMAN	Centromere-associated protein E	316.2	5.4	153.5	2	0.5	26.38	3.23077	7	26.82	3.15534	7	76.37	1.20465	7	104.62
CENPF_HUMAN	Centromere protein F	367.5	4.9	160.5	2	0.5	31.13	3	5	59.97	1.58252	5	9.36	0.646512	5	56.67
CEP85_HUMAN	Centrosomal protein of 85 kDa	85.6	5.6	97.6	3	2.4	25.32	1.61538	6	21.4	29.2233	6	16.32	22.2326	6	17.28
CERU_HUMAN	Ceruloplasmin	122.1	5.4	6508.5	90	58.5	14.72	3.76923	727	64.15	3.48544	729	73.7	1.13953	728	27.07
CETP_HUMAN	Cholesteryl ester transfer protein	54.7	5.7	146.8	4	10.1	29.81	0.641026	7	24.47	0.514563	7	28.93	0.976744	7	26.48
CF120_HUMAN	UPF0669 protein C6orf120	20.8	4.6	87.9	2	11.0	4.20	1.38462	6	46.09	0.61165	6	12.94	0.544186	6	32.54
CFAB_HUMAN	Complement factor B	85.5	6.7	2633.1	36	45.2	12.46	3.28205	317	80.11	3.8835	330	117.1	1.46047	340	53.28
CFAD_HUMAN	Complement factor D	27.0	9.1	1222.2	14	51.4	12.32	1.51282	111	76.17	1.15534	126	72.04	0.930233	112	69.83
CFAH_HUMAN	Complement factor H	139.0	6.2	860.3	19	19.7	12.68	0.948718	56	65.37	1.99029	57	68.63	2.44651	55	64.14
CFAI_HUMAN	Complement factor I	65.7	9.0	617.4	11	23.0	16.48	2.35897	44	42.2	2.69903	43	31.7	1.47442	43	30.58
CH046_HUMAN	Uncharacterized protein C8orf46	22.6	10.7	38	1	3.4	37.35	0.538462	4	13.57	0.116505	4	24.72	0.269767	4	22.61
CH10_HUMAN	10 kDa heat shock protein, mitochondrial	10.9	9.4	117	3	28.4	13.17	0.333333	5	84.77	1.61165	5	18.53	5.79535	5	97.78
CH3L1_HUMAN	Chitinase-3-like protein 1	42.6	9.4	333.2	7	20.6	19.07	0.846154	20	178.81	1.12621	21	80.52	1.89302	21	112.48
CHD5_HUMAN	Chromodomain-helicase-DNA-binding protein 5	222.9	5.8	61.6	1	0.4	10.66	17.9231	5	49.64	3.35922	5	38.83	0.227907	5	10.26
CHD7_HUMAN	Chromodomain-helicase-DNA-binding protein 7	335.7	5.9	34.6	1	0.2	1135.93	0.205128	5	2.94	0.126214	5	39.54	0.72093	5	40.45
CHFR_HUMAN	E3 ubiquitin-protein ligase CHFR	73.3	5.7	44.2	1	1.5	70.48	3.15385	12	96.63	33.1262	8	37.47	19.0698	11	59.21
CHIT1_HUMAN	Chitotriosidase-1	51.6	6.7	84	1	4.5	10.12	3.05128	3	17.27	1.63107	3	27.46	0.655814	3	19.14
CHL1_HUMAN	Neural cell adhesion molecule L1-like protein	135.0	5.4	194	5	4.3	17.44	0.410256	14	85.65	0.23301	16	73.36	0.702326	14	73.48
CHLE_HUMAN	Cholinesterase	68.4	7.8	179.6	2	5.3	5.80	1.33333	4	9.79	1.52427	4	46.95	1.23256	5	45.34
CHM1B_HUMAN	Charged multivesicular body protein 1b	22.1	9.0	171.7	4	15.1	30.68	0.461538	11	32.89	0.271845	11	37.7	0.72093	11	40.92
CHM2B_HUMAN	Charged multivesicular body protein 2b	23.9	9.5	157.5	3	12.7	15.86	0.435897	7	28.96	0.252427	7	40.07	0.72093	7	38.5
CHM4B_HUMAN	Charged multivesicular body protein 4b	24.9	4.6	86.1	2	8.0	13.40	0.205128	2	4.4	0.174757	2	18.92	0.981395	2	23.46
CHMP5_HUMAN	Charged multivesicular body protein 5	24.6	4.5	255.6	6	29.7	15.99	0.820513	11	118.59	0.320388	11	94.13	0.474419	11	67.18
CHODL_HUMAN	Chondrolectin	30.4	6.4	31.9	1	3.7	4.43	0.666667	3	25.22	0.320388	3	11.03	0.6	3	29.65
CILP1_HUMAN	Cartilage intermediate layer protein 1	132.5	9.7	206.9	4	4.6	16.01	1.48718	11	93.89	0.699029	11	48.82	0.572093	11	56.97
CILP2_HUMAN	Cartilage intermediate layer protein 2	126.2	9.8	213.2	4	5.8	11.77	0.538462	14	67.88	0.31068	14	55.65	0.660465	13	32.1
CISY_HUMAN	Citrate synthase, mitochondrial	51.7	9.1	44.5	1	2.6	2.94	1.02564	2	146.38	4.21359	3	29.55	5.73488	2	91.54
CJ118_HUMAN	Uncharacterized protein C10orf118	103.6	5.9	90.6	3	1.6	26.53	0.461538	9	73.15	0.368932	9	125.85	0.962791	9	37.41
CK054_HUMAN	Ester hydrolase C11orf54	35.1	6.3	235.7	4	14.9	9.98	0.538462	24	39.29	0.601942	26	51.37	1.26512	25	29.23
CK063_HUMAN	Uncharacterized protein C11orf63	88.5	9.8	57.3	2	2.2	613.21	3.10256	2	11.09	2.17476	2	26.35	0.865116	2	14.93
CKAP2_HUMAN	Cytoskeleton-associated protein 2	76.9	10.1	81.1	1	1.0	1141.64	0.333333	3	23.41	0.174757	3	35.65	0.674419	3	17.8
CLC4G_HUMAN	C-type lectin domain family 4 member G	32.5	6.2	36.7	1	9.6	15.50	0.794872	2	21.42	0.339806	2	16.22	0.516279	2	5.06
CLCA1_HUMAN	Calcium-activated chloride channel regulator 1	100.2	5.9	2672.1	40	48.8	12.26	1.25641	209	82.05	7.21359	221	141.85	6.09767	207	148.04
CLCA4_HUMAN	Calcium-activated chloride channel regulator 4	101.2	5.2	180.2	4	3.3	193.15	1.17949	30	64.18	6.45631	29	177.55	6.3907	28	109.71
CLH1_HUMAN	Clathrin heavy chain 1	191.5	5.4	337.1	7	5.9	17.41	1.07692	13	68.86	2.45631	15	67.22	2.54419	13	57.9
CLIC1_HUMAN	Chloride intracellular channel protein 1	26.9	4.9	415.9	7	44.0	22.37	0.666667	14	52.1	0.776699	13	19.26	1.53953	14	44.46
CLIC4_HUMAN	Chloride intracellular channel protein 4	28.8	5.3	100.3	2	7.9	27.71	0.538462	5	48.56	0.718447	5	12.32	1.63256	5	52.28
CLM2_HUMAN	CMRF35-like molecule 2	22.9	9.3	103.4	2	9.3	13.85	0.948718	25	28.69	0.524272	25	32.71	0.67907	25	24.24
CLM8_HUMAN	CMRF35-like molecule 8	33.2	5.2	158.6	1	6.0	9.91	1	19	29.33	0.68932	19	32.07	0.790698	18	14.97
CLM9_HUMAN	CMRF35-like molecule 9	36.0	5.6	209.8	4	12.3	11.27	0.74359	14	30.68	0.291262	15	70.44	0.44186	15	29.63
CLMP_HUMAN	CXADR-like membrane protein	41.3	9.0	69.1	2	9.4	176.18	0.948718	4	26.7	0.757282	4	5.31	0.995349	4	26.05
CLN5_HUMAN	Ceroid-lipofuscinosis neuronal protein 5	41.5	7.7	123	3	6.7	13.18	0.717949	5	11.46	0.427184	6	40.2	0.860465	5	17.09
CLUS_HUMAN	Clusterin	52.5	5.9	1541.5	23	33.6	13.86	1.33333	121	43.48	1.12621	122	32.2	1.06047	119	24.65
CMBL_HUMAN	Carboxymethylenebutenolidase homolog	28.0	6.9	229.4	4	22.0	12.89	0.307692	12	56.7	0.640777	19	75.17	1.98605	13	82.59
CMGA_HUMAN	Chromogranin-A	50.7	4.4	121.2	3	11.2	9.37	1.69231	5	131.68	0.679612	5	71.75	0.497674	5	41.24
CNDP1_HUMAN	Beta-Ala-His dipeptidase	56.7	5.0	183	3	7.9	7.47	3.76923	7	28.24	1.64078	7	66.48	0.534884	7	40.67
CNDP2_HUMAN	Cytosolic non-specific dipeptidase	52.8	5.6	227.3	5	19.4	7.58	1.15385	6	73.43	1.25243	6	16.55	1.33488	6	63.9
CNOT1_HUMAN	CCR4-NOT transcription complex subunit 1	266.8	6.7	37.7	1	0.3	47.62	0.384615	4	8.44	0.145631	4	5.41	0.474419	4	13.45
CNTFR_HUMAN	Ciliary neurotrophic factor receptor subunit alpha	40.6	6.3	178.3	4	20.2	23.30	0.820513	18	24.52	0.533981	18	20	0.804651	18	29.77
CNTN1_HUMAN	Contactin-1	113.2	5.5	446.8	9	8.8	15.91	0.358974	23	42.12	0.203883	23	41.5	0.688372	23	24.34
CNTRL_HUMAN	Centriolin	268.7	5.3	88	2	1.2	55.89	1	2	1.74	1.46602	2	131.91	1.8	2	135.59
CO056_HUMAN	Putative uncharacterized protein C15orf56	17.0	12.8	73.1	2	8.7	13.41	0.435897	7	83.89	3.48544	10	46.79	8.90233	7	87.15
CO1A1_HUMAN	Collagen alpha-1(I) chain	138.9	5.5	258.6	5	2.9	10.74	1.15385	16	82.83	1.46602	17	445.1	2.40465	16	104.58
CO2_HUMAN	Complement C2	83.2	7.9	769.1	14	22.6	8.85	2.97436	46	95.58	3.82524	47	94.97	1.64651	48	58.7
CO3_HUMAN	Complement C3	187.0	6.0	10601.8	152	73.9	15.70	3.28205	1159	76.05	5.65049	1179	112.26	2.18605	1193	53.13
CO3A1_HUMAN	Collagen alpha-1(III) chain	138.5	6.2	43.8	1	0.8	36.68	0.666667	2	56.54	2.2233	2	21.31	4.03721	2	85
CO4A_HUMAN	Complement C4-A	192.7	6.7	5181.6	78	48.6	13.94	2.02564	528	74.23	3.60194	540	118.58	2.23721	535	71.22
CO4A1_HUMAN	Collagen alpha-1(IV) chain	160.5	9.4	52.4	1	0.9	6.36	0.820513	2	16.54	0.932039	2	4.51	1.3814	2	11.96
CO4A2_HUMAN	Collagen alpha-2(IV) chain	167.4	9.6	174.7	4	4.0	9.76	0.74359	10	96.02	0.398058	10	147.52	0.669767	10	40.3
CO4B_HUMAN	Complement C4-B	192.6	7.0	5421.8	81	49.7	14.34	2	521	75.88	3.58252	534	120.1	2.28837	528	70.87
CO5_HUMAN	Complement C5	188.2	6.1	784.8	13	13.2	19.54	2.20513	31	89.79	4.57282	34	126.29	2.49302	31	52.38
CO5A1_HUMAN	Collagen alpha-1(V) chain	183.4	4.8	102.2	3	1.6	22.58	0.794872	3	55.36	0.970874	3	39.85	1.49302	3	19.23
CO5A3_HUMAN	Collagen alpha-3(V) chain	172.0	6.4	87.4	2	2.2	11.91	1.10256	4	30.36	0.825243	4	63.24	0.911628	4	50.54
CO6_HUMAN	Complement component C6	104.7	6.4	400.4	9	10.8	12.27	1.84615	16	43.07	3.23301	16	92.96	2.14884	16	69.69
CO6A1_HUMAN	Collagen alpha-1(VI) chain	108.5	5.1	2212.9	30	30.8	11.78	0.487179	246	90.22	0.368932	241	81.15	0.939535	240	62.17
CO6A3_HUMAN	Collagen alpha-3(VI) chain	343.5	6.3	1692.1	30	12.3	14.96	0.974359	98	82.31	0.796117	100	71.96	0.953488	96	46.41
CO7_HUMAN	Complement component C7	93.5	6.1	1106.2	18	30.6	17.36	1.8	50	48.2	2.5	52	63.7	1.6	52	47.7
CO8A_HUMAN	Complement component C8 alpha chain	65.1	6.1	327.4	6	15.9	11.76	1.51282	12	67.4	1.29126	12	66.45	1.12093	13	42.33
CO8B_HUMAN	Complement component C8 beta chain	67.0	9.5	181.4	3	6.9	9.74	3.46154	6	51.78	2.81553	6	18.92	1	6	52.78
CO8G_HUMAN	Complement component C8 gamma chain	22.3	9.4	339.8	6	42.1	13.51	1.69231	15	69.5	1.52427	14	41.04	0.930233	16	47.52
CO9_HUMAN	Complement component C9	63.1	5.3	1546.7	26	49.9	18.18	3.12821	104	78.77	1.85437	105	71.65	0.748837	106	40.6
COCA1_HUMAN	Collagen alpha-1(XII) chain	332.9	5.3	385.5	6	3.3	11.95	1.07692	18	24.3	0.38835	20	37.25	0.474419	19	22.74
COCH_HUMAN	Cochlin	59.4	9.1	97.9	2	3.6	330.90	0.666667	7	42.23	0.514563	7	55.58	0.930233	7	42.09
COEA1_HUMAN	Collagen alpha-1(XIV) chain	193.4	5.0	36.6	1	0.6	30.06	0.666667	2	17.35	0.640777	2	5.83	1.1907	2	11.43
COF1_HUMAN	Cofilin-1	18.5	9.1	669.2	11	61.4	15.94	0.948718	29	76.22	0.980583	29	39.4	1.26977	29	62.14
COFA1_HUMAN	Collagen alpha-1(XV) chain	141.6	4.8	892.1	13	12.2	20.47	0.564103	81	51.54	0.339806	82	54.81	0.753488	82	45.39
COG6_HUMAN	Conserved oligomeric Golgi complex subunit 6	73.2	5.4	98.1	3	2.7	292.58	9.38462	11	37.61	2.92233	11	36.37	0.381395	11	20.52
COIA1_HUMAN	Collagen alpha-1(XVIII) chain	178.1	5.6	469.3	7	7.6	45.38	0.74359	20	76.48	0.378641	20	70.43	0.632558	20	21.96
COL12_HUMAN	Collectin-12	81.5	5.4	466.2	10	10.1	11.91	2.4359	62	50.87	1.54369	62	44.35	0.762791	60	16.83
COMP_HUMAN	Cartilage oligomeric matrix protein	82.8	4.2	465.7	6	12.0	11.20	0.589744	23	111.7	0.427184	23	138.55	0.874419	24	52.17
COR1A_HUMAN	Coronin-1A	51.0	6.3	227.6	3	10.0	15.43	0.307692	8	148.68	0.446602	8	103.37	1.72093	8	38.8
COR2B_HUMAN	Coronin-2B	54.9	9.4	68.6	2	2.5	22.06	0.589744	6	27.43	0.281553	6	35.46	0.6	6	12.25
COSA1_HUMAN	Collagen alpha-1(XXVIII) chain	116.6	6.1	64.6	2	1.4	13.08	0.358974	3	39.91	0.38835	3	95.7	1.32093	3	45.43
COTL1_HUMAN	Coactosin-like protein	15.9	5.4	492	9	62.0	13.53	0.820513	92	52.87	0.61165	94	28.65	0.893023	91	36.1
CP089_HUMAN	UPF0764 protein C16orf89	45.4	5.8	204.8	4	11.9	12.79	0.282051	8	24	0.174757	8	49.19	0.72093	8	38.65
CP135_HUMAN	Centrosomal protein of 135 kDa	133.4	5.8	145.9	5	2.5	30.35	3.64103	17	138.31	1.94175	17	194.94	0.655814	17	84
CP2CJ_HUMAN	Cytochrome P450 2C19	55.9	7.8	27.9	1	2.4	20.70	15.3846	2	25.52	3.41748	2	21.86	0.274419	2	3.51
CPN2_HUMAN	Carboxypeptidase N subunit 2	60.5	5.6	685	12	25.7	20.10	0.948718	60	34.48	1.06796	64	36.49	1.44651	59	21.1
CPNE3_HUMAN	Copine-3	60.1	5.5	75.4	2	4.7	3.24	0.846154	4	60.06	0.61165	4	44.22	0.883721	4	66.98
CPNS1_HUMAN	Calpain small subunit 1	28.3	4.9	108.2	2	13.8	19.04	0.487179	4	114.88	1.07767	4	20.05	2.76744	4	84.77
CPNS2_HUMAN	Calpain small subunit 2	27.6	5.4	79	1	2.8	16.33	0.205128	2	16.39	0.893204	2	3.47	5.61395	2	12.86
CPVL_HUMAN	Probable serine carboxypeptidase CPVL	54.1	5.3	217.5	5	10.3	11.85	0.717949	14	16.64	0.475728	14	21.11	0.874419	15	38.22
CR063_HUMAN	Uncharacterized protein C18orf63	77.2	10.5	63.2	1	1.0	12.49	0.179487	4	28.35	0.15534	4	11.59	1.04651	4	17.99
CRAC1_HUMAN	Cartilage acidic protein 1	71.4	4.8	48.9	1	1.5	10.93	2.41026	3	16.28	1.48544	3	24.69	0.75814	3	42.17
CRHBP_HUMAN	Corticotropin-releasing factor-binding protein	36.1	6.1	145.4	3	11.2	4.26	0.615385	8	90.45	1.23301	9	57.06	2.46047	8	123.35
CRIS3_HUMAN	Cysteine-rich secretory protein 3	27.6	9.2	99	3	8.2	22.36	0.974359	9	43.16	0.349515	9	59.03	0.44186	9	17.28
CRNN_HUMAN	Cornulin	53.5	5.7	874.9	13	36.0	12.05	0.25641	112	70.14	0.0776699	108	107.21	0.386047	103	77.45
CRP_HUMAN	C-reactive protein	25.0	5.3	139	3	13.4	13.66	1.05128	8	54.94	3.83495	8	74.32	4.49767	8	51.5
CRUM2_HUMAN	Protein crumbs homolog 2	134.2	5.2	77.8	1	1.9	49.89	0.666667	2	48.71	0.485437	2	28.77	0.902326	2	18.08
CRYAB_HUMAN	Alpha-crystallin B chain	20.1	6.9	97	2	10.9	11.52	0.692308	4	32.37	0.699029	4	26.23	1.2186	4	12.26
CRYL1_HUMAN	Lambda-crystallin homolog	35.4	5.8	83.6	2	6.9	17.01	1.07692	3	29.64	0.679612	3	15.46	0.762791	3	39.28
CS010_HUMAN	UPF0556 protein C19orf10	18.8	6.2	280.9	6	30.6	26.93	1.33333	15	26.9	1.27184	15	22.74	1.17209	15	23.95
CS077_HUMAN	Transmembrane protein C19orf77	15.0	5.1	72.4	2	18.5	11.01	0.282051	4	31.06	0.601942	4	42.56	2.55814	4	40.65
CSF1_HUMAN	Macrophage colony-stimulating factor 1	60.1	5.0	626	9	10.6	14.62	0.820513	49	55.59	0.504854	50	35.24	0.776744	49	38.12
CSPG4_HUMAN	Chondroitin sulfate proteoglycan 4	250.4	5.2	465.6	9	5.7	11.39	0.435897	30	93.83	0.339806	30	68.51	0.962791	30	42.42
CSTN1_HUMAN	Calsyntenin-1	109.7	4.7	57.3	1	1.1	3.28	0.538462	6	51.71	0.407767	6	30.4	0.934884	6	69.03
CTGF_HUMAN	Connective tissue growth factor	38.1	10.0	369.2	8	24.1	14.52	1.20513	38	30.96	1.46602	38	37.6	1.46977	36	31.3
CTSRB_HUMAN	Cation channel sperm-associated protein subunit beta	126.8	6.8	39.6	1	0.6	3.49	14.3077	3	50.93	11.2136	3	44.12	0.962791	3	8.19
CUBN_HUMAN	Cubilin	398.5	5.0	3358.5	54	18.0	12.87	0.846154	230	54.06	0.504854	232	47.04	0.734884	229	33.77
CUTA_HUMAN	Protein CutA	19.1	5.3	317.7	5	40.8	11.30	0.74359	44	87.28	0.456311	48	55.04	0.734884	44	51.19
CUX2_HUMAN	Homeobox protein cut-like 2	161.6	5.3	95.1	3	1.3	548.01	0.538462	7	69.61	0.300971	6	58.58	0.734884	5	59.58
CX056_HUMAN	UPF0428 protein CXorf56	25.6	9.7	52.6	1	5.0	17.65	19.2308	2	45.31	17.0874	2	31.86	1.09302	2	12.16
CXXC5_HUMAN	CXXC-type zinc finger protein 5	33.0	10.2	27	1	3.1	864.27	0.333333	2	11.83	0.339806	2	12.47	1.22326	2	0.63
CYBR1_HUMAN	Cytochrome b reductase 1	31.6	9.5	46.7	1	3.5	12.50	0.564103	4	9.21	0.631068	4	4.65	1.40465	4	11.19
CYC_HUMAN	Cytochrome c	11.7	10.1	407.3	8	61.9	24.40	0.615385	30	73.05	1.34951	28	14.09	2.66512	30	74.13
CYTA_HUMAN	Cystatin-A	11.0	5.3	286.4	6	60.2	14.03	0.179487	30	44.06	0.116505	28	103.2	0.627907	30	126.02
CYTB_HUMAN	Cystatin-B	11.1	7.9	335.1	6	57.1	26.15	0.358974	29	58.28	0.669903	29	19.37	2.24186	29	47.9
CYTC_HUMAN	Cystatin-C	15.8	9.9	1470.1	22	63.0	18.33	0.717949	182	113.07	0.932039	194	39.82	1.59535	183	97.17
CYTF_HUMAN	Cystatin-F	16.4	10.1	105	3	6.9	339.74	5.28205	4	49.78	2.94175	4	57.36	0.683721	4	95.88
CYTM_HUMAN	Cystatin-M	16.5	9.5	861.8	13	66.4	12.15	1.53846	71	47.71	1.04854	68	46.73	0.809302	69	22.26
CYTS_HUMAN	Cystatin-S	16.2	4.8	122.2	2	20.6	8.86	0.794872	6	46.33	0.475728	6	31.67	0.744186	6	19.31
DAB2_HUMAN	Disabled homolog 2	82.4	5.2	30.2	1	1.2	15.30	0.153846	2	4.93	0.0679612	2	1.43	0.534884	2	6.36
DAF_HUMAN	Complement decay-accelerating factor	41.4	9.1	414.5	9	22.6	21.17	0.435897	44	37.7	0.271845	45	40.09	0.772093	45	28
DAG1_HUMAN	Dystroglycan	97.4	9.4	735.9	10	11.5	10.77	1.51282	41	78.28	1.46602	40	35.49	1.21395	41	61.63
DBF4A_HUMAN	Protein DBF4 homolog A	76.8	8.9	27.9	1	1.3	58.69	50.7436	7	21.43	9.35922	7	23.42	0.227907	7	6.68
DCA13_HUMAN	DDB1- and CUL4-associated factor 13	51.4	10.0	27.7	1	1.8	805.23	2.15385	2	12.55	0.815534	2	5.1	0.460465	2	7.41
DCD_HUMAN	Dermcidin	11.3	6.1	121.8	2	15.5	12.20	0.871795	7	21.36	0.737864	7	17.28	1.02326	7	18.4
DCXR_HUMAN	L-xylulose reductase	25.9	9.7	46.1	1	4.5	2.98	0.333333	2	26.32	0.359223	2	18.52	1.32093	2	7.53
DDAH1_HUMAN	N(G),N(G)-dimethylarginine dimethylaminohydrolase 1	31.1	5.5	111.8	2	7.7	8.61	0.948718	5	112.09	0.815534	5	35.99	1.06512	5	59.93
DDB1_HUMAN	DNA damage-binding protein 1	126.9	5.0	81.4	2	1.5	740.45	1.48718	3	19.48	0.825243	3	37.69	0.688372	3	59.82
DDR1_HUMAN	Epithelial discoidin domain-containing receptor 1	101.1	6.4	91.4	2	2.3	17.81	0.307692	14	64.89	0.31068	15	38.11	1.05116	13	53.14
DDR2_HUMAN	Discoidin domain-containing receptor 2	96.7	5.1	142.4	3	4.7	11.56	1.23077	7	67.38	0.669903	7	50.36	0.674419	7	29.86
DDX24_HUMAN	ATP-dependent RNA helicase DDX24	96.3	9.8	97	2	2.1	10.64	1.17949	10	20.62	2.12621	9	4.21	2.34884	9	13.29
DDX31_HUMAN	Probable ATP-dependent RNA helicase DDX31	94.0	10.7	35.4	1	0.9	13.46	2.71795	2	3.8	1.13592	2	4.33	0.511628	2	0.53
DECR_HUMAN	2,4-dienoyl-CoA reductase, mitochondrial	36.0	10.1	25.7	1	2.1	24.10	5.35897	2	7.19	5.25243	2	2.95	1.20465	2	4.23
DEF1_HUMAN	Neutrophil defensin 1	10.2	7.6	197.3	3	52.1	10.86	1.30769	7	43.75	1.38835	7	29.69	1.31628	8	55.53
DEF5_HUMAN	Defensin-5	10.1	10.0	245.1	3	36.2	11.65	2.33333	9	144.41	4.87379	9	121.11	2.57209	9	202.14
DEF6_HUMAN	Defensin-6	11.0	5.1	522.1	5	40.0	2.68	0.897436	17	55.3	1.28155	20	101.53	1.44186	18	51.44
DEPD5_HUMAN	DEP domain-containing protein 5	181.1	6.3	25.8	1	0.4	23.79	0.897436	3	4.17	0.485437	3	2.08	0.669767	3	4.39
DERM_HUMAN	Dermatopontin	24.0	4.5	598.4	9	49.3	13.15	1.23077	57	56.41	0.747573	58	67.66	0.72093	55	46.29
DESM_HUMAN	Desmin	53.5	5.1	117.8	3	5.3	12.17	0.538462	10	57.85	1.1165	10	50.11	2.49767	10	76.94
DEST_HUMAN	Destrin	18.5	9.2	100.5	2	14.5	29.33	0.615385	6	45.03	0.621359	6	19.55	1.2093	6	26.76
DGKG_HUMAN	Diacylglycerol kinase gamma	89.1	6.4	37.1	1	1.3	60.03	2.02564	4	58.76	0.669903	4	21.35	0.404651	4	79.31
DGKK_HUMAN	Diacylglycerol kinase kappa	141.7	5.3	31.4	1	0.6	958.87	6	3	11.43	1.17476	3	13.6	0.24186	3	5.79
DHAK_HUMAN	Bifunctional ATP-dependent dihydroxyacetone kinase/FAD-AMP lyase (cyclizing)	58.9	7.9	268.3	4	11.0	25.96	0.974359	9	50.96	1.1165	9	32.39	1.42326	9	48.9
DHR11_HUMAN	Dehydrogenase/reductase SDR family member 11	28.3	6.2	72.3	1	6.5	7.40	1.20513	3	45.11	4.03883	4	48.08	5.36744	3	45.87
DHSO_HUMAN	Sorbitol dehydrogenase	38.3	9.3	53.2	1	2.5	19.66	0.974359	2	2.4	0.640777	2	0.75	0.813953	2	1.65
DIAC_HUMAN	Di-N-acetylchitobiase	43.7	6.2	888.5	13	38.2	11.11	1.15385	68	29.78	0.563107	69	33.8	0.576744	68	30.74
DIAP3_HUMAN	Protein diaphanous homolog 3	136.8	6.7	37.5	1	0.6	20.47	2.92308	4	12.13	9.27184	4	29.93	3.87907	4	34.06
DIDO1_HUMAN	Death-inducer obliterator 1	243.7	8.9	33.2	1	0.3	35.51	1.07692	12	37.06	2.51456	12	21.67	2.85581	12	34.68
DIXC1_HUMAN	Dixin	77.4	5.8	64.3	2	0.9	62.93	7.61538	3	112.96	2.64078	3	34.48	0.427907	3	63.05
DJC28_HUMAN	DnaJ homolog subfamily C member 28	45.8	10.1	64.2	2	3.1	18.63	1.38462	5	81.8	2.41748	5	111.55	2.13488	5	252.92
DLGP5_HUMAN	Disks large-associated protein 5	95.1	9.8	30	1	1.2	28.54	6.12821	2	10.59	1.39806	2	7.71	0.27907	2	2.86
DMBT1_HUMAN	Deleted in malignant brain tumors 1 protein	260.6	5.1	770.7	11	6.2	12.91	0.74359	31	165.78	3.97087	34	154.88	3.84186	30	131.84
DNAS1_HUMAN	Deoxyribonuclease-1	31.4	4.6	774.2	13	42.9	13.73	0.307692	82	73.03	0.23301	85	61.61	0.916279	82	45.04
DNPH1_HUMAN	2'-deoxynucleoside 5'-phosphate N-hydrolase 1	19.1	4.8	80.1	2	20.1	6.33	0.769231	3	20.19	0.456311	3	22.52	0.716279	3	40.65
DNS2A_HUMAN	Deoxyribonuclease-2-alpha	39.6	9.2	72.6	1	3.9	35.24	0.641026	4	53.97	2.01942	4	8.88	3.8186	4	57.75
DOK4_HUMAN	Docking protein 4	37.0	9.3	31.4	1	3.1	33.55	3.5641	3	8.63	1.03883	3	1.45	0.35814	3	10.07
DOPD_HUMAN	D-dopachrome decarboxylase	12.7	7.8	188.5	4	32.2	10.88	0.948718	14	29.73	1.28155	14	22.33	1.67442	14	22.51
DPEP1_HUMAN	Dipeptidase 1	45.6	5.7	857.7	14	37.2	11.56	0.461538	80	49.66	0.718447	81	18.79	1.90698	81	50.26
DPOG1_HUMAN	DNA polymerase subunit gamma-1	139.5	6.5	67.1	2	1.0	24.55	0.974359	5	36.33	0.669903	5	23.06	0.84186	5	28.08
DPP2_HUMAN	Dipeptidyl peptidase 2	54.3	5.9	468.8	8	19.3	8.82	1.02564	16	48.17	1.00971	16	39.84	1.29767	15	19.68
DPP3_HUMAN	Dipeptidyl peptidase 3	82.5	4.9	115.8	3	6.6	14.08	1.12821	19	44.23	8.27184	20	144.26	9.96279	19	101.09
DPP4_HUMAN	Dipeptidyl peptidase 4	88.2	5.6	1743.9	31	39.9	14.52	0.692308	157	42.68	0.825243	156	26.6	1.50233	157	39.31
DSC1_HUMAN	Desmocollin-1	99.9	5.1	198.1	4	5.7	12.23	1.30769	11	52.03	1.4466	11	74.77	1.36279	11	59.69
DSC2_HUMAN	Desmocollin-2	99.9	5.1	1200.9	17	26.6	12.08	0.820513	101	69.82	0.582524	104	100.73	0.874419	103	58.13
DSC3_HUMAN	Desmocollin-3	99.9	5.7	38.5	1	1.1	17.47	0.589744	2	9.19	1.43689	2	30.16	3.0093	2	40.16
DSG2_HUMAN	Desmoglein-2	122.2	5.0	247.3	4	5.0	8.87	1	8	70.66	0.679612	8	35.47	0.827907	8	78.1
DSRAD_HUMAN	Double-stranded RNA-specific adenosine deaminase	136.0	9.6	29.8	1	0.8	2.81	0.641026	2	8.99	0.718447	2	4.58	1.36279	2	4.4
DUS13_HUMAN	Dual specificity protein phosphatase 13	22.1	9.9	26.1	1	3.0	1106.80	97.4615	7	58.29	57.8932	6	57.22	0.795349	9	3.67
DYH10_HUMAN	Dynein heavy chain 10, axonemal	514.5	5.6	89.8	2	0.2	54.40	1.84615	2	996.74	0.961165	2	173.84	0.64186	2	124.41
DYH2_HUMAN	Dynein heavy chain 2, axonemal	507.4	5.9	89	2	0.5	32.01	2.41026	2	67.15	2.78641	2	74.46	1.41395	2	201.79
DYL2_HUMAN	Dynein light chain 2, cytoplasmic	10.3	7.7	45	1	12.4	9.70	0.692308	2	7.64	0.728155	2	2.13	1.27907	2	9.79
DYN3_HUMAN	Dynamin-3	97.7	9.2	56.3	1	1.4	567.27	0.461538	3	12.64	0.281553	3	3.83	0.753488	3	10.29
DZI1L_HUMAN	Zinc finger protein DZIP1L	86.8	7.0	26.7	1	0.9	856.99	0.435897	2	8.7	0.242718	2	4.46	0.660465	2	4.22
ECH1_HUMAN	Delta(3,5)-Delta(2,4)-dienoyl-CoA isomerase, mitochondrial	35.8	9.2	55.8	1	6.7	9.92	1.25641	4	115.28	1.62136	4	10.59	1.59535	4	111.54
EF1A1_HUMAN	Elongation factor 1-alpha 1	50.1	9.7	545.6	10	20.3	17.94	0.512821	25	53.57	0.572816	25	54.57	1.4	25	41.23
EF1G_HUMAN	Elongation factor 1-gamma	50.1	6.3	169.2	3	5.5	5.82	1.10256	6	18.07	2.86408	6	30.89	3.16744	6	36.7
EF2_HUMAN	Elongation factor 2	95.3	6.4	187.4	4	5.9	15.85	0.846154	7	98.78	1.58252	8	55.03	2.2093	7	50.81
EFC14_HUMAN	EF-hand calcium-binding domain-containing protein 14	55.0	5.9	127.4	3	10.3	10.01	1.28205	5	17.93	0.893204	5	41.28	0.851163	5	27.4
EFCB5_HUMAN	EF-hand calcium-binding domain-containing protein 5	173.3	5.5	56	2	1.1	828.60	0.717949	6	192.17	0.640777	6	333.02	1.09302	6	55.46
EFHD2_HUMAN	EF-hand domain-containing protein D2	26.7	5.0	44.8	1	3.8	20.03	0.307692	4	24.48	0.92233	4	24.64	3.59535	4	40.67
EFNA1_HUMAN	Ephrin-A1	23.8	6.4	62.9	1	3.9	37.69	0.282051	4	13.38	0.262136	4	13.8	1.17674	4	6.29
EFNB1_HUMAN	Ephrin-B1	38.0	9.8	164.3	3	17.1	12.25	1.30769	11	18.09	0.864078	11	9.46	0.767442	11	9.68
EGF_HUMAN	Pro-epidermal growth factor	133.9	5.5	1961.5	31	27.8	15.71	0.410256	180	53.09	0.359223	184	41.3	1.03256	182	38.43
EHD1_HUMAN	EH domain-containing protein 1	60.6	6.4	315.5	7	13.1	6.47	0.435897	11	51.38	0.456311	11	61.91	1.30233	11	52.36
EHD3_HUMAN	EH domain-containing protein 3	60.8	6.1	302.3	6	11.0	6.08	0.435897	8	53.05	0.504854	8	67.5	1.42326	8	46.38
EIF3E_HUMAN	Eukaryotic translation initiation factor 3 subunit E	52.2	5.7	63.3	1	2.0	9.77	1.15385	2	2.75	0.543689	2	1.87	0.576744	2	0.88
ELAF_HUMAN	Elafin	12.3	10.6	32.5	1	13.7	3.19	0.461538	4	49.65	0.398058	4	8.16	1.07907	4	40.81
ELNE_HUMAN	Neutrophil elastase	28.5	12.2	374.9	5	20.2	8.33	0.538462	23	204.1	1.59223	28	83.71	3.9907	24	122.8
ENDD1_HUMAN	Endonuclease domain-containing 1 protein	55.0	5.4	1438	17	42.0	8.08	1.07692	91	41.69	0.592233	94	49.22	0.627907	92	34.65
ENOA_HUMAN	Alpha-enolase	47.1	7.7	1272.3	19	58.3	12.71	0.717949	90	62.62	1.13592	91	28.99	1.90233	90	69.92
ENPL_HUMAN	Endoplasmin	92.4	4.6	324.2	5	8.0	9.28	0.897436	15	96.15	1.86408	15	39.18	2.55814	15	112.49
EPCR_HUMAN	Endothelial protein C receptor	26.7	6.9	551.6	8	37.0	10.82	0.435897	65	100.48	0.359223	72	109.57	0.95814	65	62.15
EPHA1_HUMAN	Ephrin type-A receptor 1	108.1	6.2	125.8	3	3.8	25.55	1.15385	3	22.85	0.834951	3	32.55	0.893023	3	41.78
EPHA2_HUMAN	Ephrin type-A receptor 2	108.2	5.8	145.4	2	4.0	12.15	0.974359	4	33.36	1.45631	4	315	1.85116	4	201.46
EPHA7_HUMAN	Ephrin type-A receptor 7	112.0	5.5	198.4	3	4.4	6.92	0.641026	6	17.93	0.398058	6	33.87	0.753488	6	32.74
EPHB2_HUMAN	Ephrin type-B receptor 2	117.4	6.1	228.8	3	4.7	6.28	1.35897	6	85.55	0.61165	6	78.41	0.548837	6	43.37
EPHB3_HUMAN	Ephrin type-B receptor 3	110.3	5.9	103.4	2	2.3	8.34	0.512821	6	14.37	0.300971	6	32.53	0.725581	6	35.25
EPHB4_HUMAN	Ephrin type-B receptor 4	108.2	6.5	298.9	6	6.0	13.13	0.794872	33	40.81	0.582524	33	35.73	0.87907	32	22.59
EPHB6_HUMAN	Ephrin type-B receptor 6	110.6	6.2	83	1	2.6	24.19	0.692308	2	23.83	0.640777	2	1.95	1.12558	2	21.8
EPIPL_HUMAN	Epiplakin	555.3	5.3	80	1	0.5	23.06	1.41026	2	31.75	1.4466	2	11.06	1.26047	2	20.16
ERD22_HUMAN	ER lumen protein retaining receptor 2	24.4	9.4	62.3	1	8.0	4.29	1.02564	4	73.79	0.466019	4	24.1	0.553488	4	52.71
ERP44_HUMAN	Endoplasmic reticulum resident protein 44	46.9	5.0	32.2	1	2.5	3.77	2.12821	3	12.41	2.5534	3	21.3	1.47442	3	21.69
ESAM_HUMAN	Endothelial cell-selective adhesion molecule	41.2	10.2	130.6	2	6.2	14.64	0.179487	22	102.87	0.135922	24	62.1	0.976744	21	107.95
EST2_HUMAN	Cocaine esterase	61.8	5.7	286.6	5	15.6	18.88	1.30769	11	30.57	2.7767	12	56.3	2.51628	11	81.94
ESTD_HUMAN	S-formylglutathione hydrolase	31.4	6.6	140.2	4	20.9	31.37	0.897436	5	40.57	0.669903	5	41.61	0.925581	5	39.5
ETFD_HUMAN	Electron transfer flavoprotein-ubiquinone oxidoreductase, mitochondrial	68.5	7.9	32	1	1.3	736.38	11.5641	3	32.68	8.6699	3	29.86	0.92093	3	4.97
EVI5_HUMAN	Ecotropic viral integration site 5 protein homolog	92.9	5.7	82.6	2	1.5	1074.80	0.564103	7	27.23	0.485437	7	81.14	1.06512	7	53.68
EZRI_HUMAN	Ezrin	69.4	5.9	1270.9	27	45.1	16.45	0.435897	94	58.5	0.708738	93	27.17	1.9814	95	57.13
F13B_HUMAN	Coagulation factor XIII B chain	75.5	6.0	138.8	3	4.5	276.44	1	5	120.05	1.73786	5	123.89	2.16744	5	44.74
F151A_HUMAN	Protein FAM151A	64.0	6.2	296.4	6	13.7	13.09	1	10	55.1	0.757282	10	41.64	0.934884	10	20.28
F16P1_HUMAN	Fructose-1,6-bisphosphatase 1	36.8	6.7	264	5	21.6	13.62	0.487179	8	87.56	0.543689	9	35.36	1.4	8	70.18
F208B_HUMAN	Protein FAM208B	268.7	5.5	57.9	2	0.6	32.72	0.974359	10	135.64	0.300971	10	198.83	0.381395	10	27
FA10_HUMAN	Coagulation factor X	54.7	5.6	191.5	3	7.6	20.32	2.12821	4	17.23	1.57282	4	59.7	0.906977	4	45.04
FA12_HUMAN	Coagulation factor XII	67.7	9.4	237.6	3	8.3	19.92	1.38462	22	37.96	1.80583	23	48.99	1.56744	24	48.6
FA22G_HUMAN	Protein FAM22G	79.0	9.5	109.4	3	1.8	52.97	27.8718	25	101.97	16.6311	25	140.23	0.897674	27	18.91
FA7_HUMAN	Coagulation factor VII	51.6	7.2	52.6	1	4.9	0.84	1.17949	2	8.19	1.08738	2	26.68	1.13953	2	35.44
FA8_HUMAN	Coagulation factor VIII	266.8	7.0	80.9	3	0.9	465.22	0.923077	5	57.42	1.34951	5	98.86	1.77674	5	33.15
FA9_HUMAN	Coagulation factor IX	51.7	5.2	273.4	5	14.5	11.84	3.66667	8	109.3	1.32039	8	99.91	0.44186	8	39.93
FAAA_HUMAN	Fumarylacetoacetase	46.3	6.5	168	3	8.8	10.10	0.487179	21	159.33	0.300971	21	83.35	0.772093	21	149.02
FABP4_HUMAN	Fatty acid-binding protein, adipocyte	14.7	7.5	731.7	9	52.3	9.54	1.58974	63	54.36	2.06796	63	61.41	1.57209	64	54.06
FABP5_HUMAN	Fatty acid-binding protein, epidermal	15.2	7.5	463	8	49.6	14.48	0.230769	55	94.01	0.116505	55	90.89	0.627907	54	53.16
FABP6_HUMAN	Gastrotropin	14.4	6.4	987.7	14	80.5	13.17	1.10256	54	95.45	6.61165	63	130.28	6.18605	56	158.2
FABPH_HUMAN	Fatty acid-binding protein, heart	14.8	6.4	332.2	6	47.4	7.85	0.589744	29	51.6	0.679612	31	57.91	1.4186	29	30.33
FABPI_HUMAN	Fatty acid-binding protein, intestinal	15.2	7.5	178.4	3	22.0	16.05	1.51282	14	15.37	3.47573	14	47.89	2.80465	14	38.67
FABPL_HUMAN	Fatty acid-binding protein, liver	14.2	7.5	485.7	7	63.8	14.94	0.769231	34	49.38	0.776699	33	36.35	1.2	34	67.07
FAM3B_HUMAN	Protein FAM3B	26.0	9.7	127.9	3	11.9	22.84	0.615385	8	55.63	0.631068	8	64.47	1.24651	8	22.28
FAM3C_HUMAN	Protein FAM3C	24.7	9.4	1288.4	17	53.7	14.50	1.41026	182	48.87	1.83495	179	37.94	1.58605	179	34.22
FANCM_HUMAN	Fanconi anemia group M protein	232.0	5.7	50.5	1	0.3	50.95	23.1282	4	6	3.65049	4	8.54	0.195349	4	4.83
FAS_HUMAN	Fatty acid synthase	273.3	6.0	97.4	1	0.5	13.13	0.564103	3	39.86	0.747573	3	13.26	1.59535	3	41.05
FBLN1_HUMAN	Fibulin-1	77.2	4.9	413.8	6	15.6	10.14	1.02564	27	42.96	0.912621	28	83.97	1.03256	28	77.7
FBLN2_HUMAN	Fibulin-2	126.5	4.6	148.8	2	3.1	8.03	1.38462	17	63.51	1.07767	17	48.23	0.953488	17	46.96
FBLN3_HUMAN	EGF-containing fibulin-like extracellular matrix protein 1	54.6	4.8	1916.7	28	53.3	16.21	1.58974	298	83.04	1.30097	307	71.56	1.06977	298	41.69
FBLN5_HUMAN	Fibulin-5	50.1	4.4	437.3	8	19.4	16.92	1.20513	28	107.23	0.815534	28	76.51	0.837209	28	47.27
FBLN7_HUMAN	Fibulin-7	47.3	9.4	77.6	1	3.2	33.59	1.30769	3	14.68	1.30097	3	15.87	1.22791	3	29.08
FBN1_HUMAN	Fibrillin-1	312.0	4.7	404.3	8	3.3	9.17	1.20513	24	102.53	0.553398	24	67.7	0.562791	24	62.87
FCG3A_HUMAN	Low affinity immunoglobulin gamma Fc region receptor III-A	29.1	9.1	303.8	6	21.7	19.15	0.25641	56	46.49	0.145631	56	40.06	0.67907	55	30.2
FCG3B_HUMAN	Low affinity immunoglobulin gamma Fc region receptor III-B	26.2	6.3	249.6	5	23.6	20.95	0.333333	30	53.38	0.165049	30	59.13	0.613953	29	14.75
FCGBP_HUMAN	IgGFc-binding protein	571.6	5.0	5380.6	78	17.7	12.79	1.28205	404	75.75	3.42718	414	82.43	3.34884	413	101.14
FCN2_HUMAN	Ficolin-2	34.0	6.4	188.5	4	11.5	18.13	1	13	30.76	0.932039	13	13.55	1.14419	13	22.13
FCN3_HUMAN	Ficolin-3	32.9	6.2	185	2	11.7	11.92	1.69231	4	64.75	6.23301	4	89.27	4.51163	4	21.99
FERM2_HUMAN	Fermitin family homolog 2	77.8	6.3	80.1	3	1.3	695.45	4.58974	3	12.25	2.65049	3	13.15	0.706977	3	1.58
FES_HUMAN	Tyrosine-protein kinase Fes/Fps	93.4	6.3	65.8	2	2.3	904.27	2.15385	8	74.08	1.75728	8	51.36	1	8	22.01
FETUA_HUMAN	Alpha-2-HS-glycoprotein	39.3	5.4	2193.3	29	49.9	12.27	2.41026	391	54.84	1.21359	393	50.74	0.637209	384	38.65
FETUB_HUMAN	Fetuin-B	42.0	6.6	134.8	2	6.8	14.50	5.94872	13	33.08	3.48544	13	28.65	0.67907	15	64.65
FGFR2_HUMAN	Fibroblast growth factor receptor 2	92.0	5.5	135.1	2	2.4	11.51	0.666667	10	19.09	0.398058	10	17.99	0.72093	10	18.87
FGL2_HUMAN	Fibroleukin	50.2	7.7	104.4	3	5.2	17.29	0.974359	8	63.93	0.631068	8	49.1	0.786047	8	15.79
FHR1_HUMAN	Complement factor H-related protein 1	37.6	8.7	565.6	9	27.3	13.38	1.12821	24	42.08	1.13592	27	47.98	1.28837	24	49.86
FHR2_HUMAN	Complement factor H-related protein 2	30.6	6.0	539.4	8	28.9	13.29	1.30769	24	53.27	1.28155	27	61.45	1.25116	24	39.32
FIBA_HUMAN	Fibrinogen alpha chain	94.9	5.6	3764.7	53	44.1	13.40	1.61538	329	63.1	3.42718	339	258.48	2.58605	344	205.63
FIBB_HUMAN	Fibrinogen beta chain	55.9	9.3	4473.1	62	64.6	13.08	1.89744	422	73.88	9.1068	419	155.91	6.53023	432	128.8
FIBG_HUMAN	Fibrinogen gamma chain	51.5	5.3	3498.2	54	60.9	13.15	2	407	67.98	9.42718	406	138.38	6.0186	408	110.07
FINC_HUMAN	Fibronectin	262.5	5.4	2907.5	48	30.3	11.85	0.769231	323	63.73	0.834951	337	78.94	1.37209	320	48.37
FKB1A_HUMAN	Peptidyl-prolyl cis-trans isomerase FKBP1A	11.9	9.1	76.6	1	12.0	12.53	0.641026	4	17.96	1.00971	4	15.79	1.96744	4	33.82
FLIP1_HUMAN	Filamin-A-interacting protein 1	138.0	9.1	117.8	3	1.9	10.13	4.46154	8	15.54	1.31068	9	20.37	0.348837	8	18.93
FLNA_HUMAN	Filamin-A	280.6	5.7	907.7	14	7.8	10.75	0.820513	53	100.05	0.485437	53	112.02	0.688372	52	70.59
FLNB_HUMAN	Filamin-B	278.0	5.4	778	16	7.6	17.86	0.820513	31	59.04	1.3301	31	73.72	2.14884	31	107.53
FLNC_HUMAN	Filamin-C	290.8	5.6	656	12	5.2	13.45	0.871795	37	74.54	0.76699	37	97.56	1	36	74.96
FLRT2_HUMAN	Leucine-rich repeat transmembrane protein FLRT2	74.0	8.9	79	1	3.0	3.39	1.38462	2	27.38	0.737864	2	5.11	0.660465	2	32.83
FMNL2_HUMAN	Formin-like protein 2	123.2	7.1	96.5	1	1.3	619.03	0.897436	3	3.07	0.38835	3	6.92	0.539535	3	4.84
FOLR1_HUMAN	Folate receptor alpha	29.8	9.6	185.3	3	12.8	19.87	0.717949	19	92.43	1.20388	19	117.81	2.07907	19	23.74
FPGT_HUMAN	Fucose-1-phosphate guanylyltransferase	66.6	6.1	25.4	1	1.0	32.95	0.25641	3	18.57	0.145631	3	11.38	0.683721	3	9.98
FREM2_HUMAN	FRAS1-related extracellular matrix protein 2	350.9	4.8	41.5	1	0.4	2.58	0.589744	2	5.26	0.398058	2	6.75	0.837209	2	1.49
FRIH_HUMAN	Ferritin heavy chain	21.2	5.2	186.4	4	27.3	12.55	2.28205	15	62.72	2.73786	15	64.5	1.48372	15	44.46
FRIL_HUMAN	Ferritin light chain	20.0	5.4	528.4	9	51.4	12.87	2.76923	52	37.95	3.1165	52	36.51	1.37674	52	35.25
FRK_HUMAN	Tyrosine-protein kinase FRK	58.2	6.2	35.7	1	3.0	29.21	1	2	5.94	0.61165	2	5.92	0.748837	2	11.9
FUCO_HUMAN	Tissue alpha-L-fucosidase	53.7	6.4	405.4	7	23.0	17.61	0.897436	23	49.62	1.35922	23	11.94	1.83256	23	53.39
FUCO2_HUMAN	Plasma alpha-L-fucosidase	54.0	5.8	340	7	15.8	19.18	0.820513	25	32.14	1.13592	26	30.9	1.60465	24	35.75
FUT10_HUMAN	Alpha-(1,3)-fucosyltransferase 10	56.1	9.4	25.7	1	2.9	49.17	1.48718	2	44.67	2.17476	2	4.62	1.7907	2	50.04
FUT8_HUMAN	Alpha-(1,6)-fucosyltransferase	66.5	7.9	38.5	1	1.6	770.48	0.307692	2	12.38	0.165049	2	17.95	0.64186	2	30.84
G3P_HUMAN	Glyceraldehyde-3-phosphate dehydrogenase	36.0	9.3	900.2	12	40.3	11.26	0.923077	60	60.74	1.45631	64	34.3	1.95349	60	61.96
G6PI_HUMAN	Glucose-6-phosphate isomerase	63.1	9.1	944.9	14	34.8	12.26	0.974359	68	71.3	2.13592	69	51.28	2.88837	69	90.71
GAK_HUMAN	Cyclin-G-associated kinase	143.1	5.4	31.6	1	0.8	682.76	1.46154	2	34.62	2.25243	2	9.02	1.88837	2	44.66
GALNS_HUMAN	N-acetylgalactosamine-6-sulfatase	58.0	6.3	232	5	10.9	7.14	0.333333	12	96.01	0.466019	12	32.56	1.38605	11	35.05
GBB2_HUMAN	Guanine nucleotide-binding protein G(I)/G(S)/G(T) subunit beta-2	37.3	5.6	268.3	4	16.2	10.77	0.410256	25	31.93	0.427184	25	27.37	1.28837	26	36.81
GBLP_HUMAN	Guanine nucleotide-binding protein subunit beta-2-like 1	35.1	8.9	108.8	1	6.3	6.39	2.51282	2	23.56	2.64078	2	22.67	1.29302	2	0.86
GBP6_HUMAN	Guanylate-binding protein 6	72.4	6.0	65.9	1	0.9	18.26	0.358974	2	29.94	1.19417	2	28.27	4.02791	2	1.57
GCN1L_HUMAN	Translational activator GCN1	292.6	7.6	125.2	2	1.1	355.49	1.15385	2	10.29	0.485437	2	44.68	0.525581	2	56.86
GDF15_HUMAN	Growth/differentiation factor 15	34.1	11.5	82.7	1	5.2	11.34	0.589744	2	49.39	1.58252	2	19.64	3.30233	2	74.12
GDF8_HUMAN	Growth/differentiation factor 8	42.7	6.4	57	2	3.5	18.79	6.66667	12	88.1	9.95146	12	112.75	1.97674	11	15.69
GDIB_HUMAN	Rab GDP dissociation inhibitor beta	50.6	6.1	360.9	7	19.3	16.50	0.615385	20	65.69	1.14563	21	30.79	2.32093	20	64.55
GDIR1_HUMAN	Rho GDP-dissociation inhibitor 1	23.2	4.9	45.2	1	7.4	10.86	1.20513	2	14.81	1.46602	2	2.41	1.50233	2	12.37
GDIR2_HUMAN	Rho GDP-dissociation inhibitor 2	23.0	4.9	158.4	4	26.4	11.59	0.820513	14	38.2	1.5534	14	32.8	2.32093	14	36.32
GELS_HUMAN	Gelsolin	85.6	5.9	3927.5	54	52.0	14.15	1.76923	426	69.21	1.42718	426	48.24	0.944186	429	49.25
GFRP_HUMAN	GTP cyclohydrolase 1 feedback regulatory protein	9.7	6.1	227.1	3	27.4	14.50	2.41026	16	56.86	1.18447	17	47.11	0.637209	16	20.14
GGACT_HUMAN	Gamma-glutamylaminecyclotransferase	17.3	6.4	76.4	2	12.4	13.18	1.15385	4	11.5	0.553398	4	4.29	0.586047	4	8.67
GGH_HUMAN	Gamma-glutamyl hydrolase	35.9	6.8	1377.5	21	48.1	18.38	0.923077	109	33.71	0.504854	110	27.51	0.674419	107	20
GGT1_HUMAN	Gamma-glutamyltranspeptidase 1	61.4	6.7	446.4	8	18.1	11.31	0.461538	25	85.81	0.427184	25	72.74	1.12093	24	33.18
GGT6_HUMAN	Gamma-glutamyltransferase 6	50.5	5.6	223.5	4	13.8	5.15	0.948718	10	104.47	0.757282	11	41.97	0.986047	10	73.95
GILT_HUMAN	Gamma-interferon-inducible lysosomal thiol reductase	27.9	4.6	88.4	2	4.4	4.86	0.358974	9	91.93	0.252427	10	40.39	0.860465	9	127.63
GIMA6_HUMAN	GTPase IMAP family member 6	32.9	4.7	53.7	2	3.8	39.43	0.461538	2	87.54	0.475728	2	50.8	1.28837	2	28.04
GINM1_HUMAN	Glycoprotein integral membrane protein 1	36.8	4.7	56.8	1	2.1	1138.76	0.666667	2	6.32	0.543689	2	8.22	1.00465	2	1.89
GKN1_HUMAN	Gastrokine-1	22.0	5.9	178.1	3	15.1	21.31	0.974359	11	57.44	1.01942	11	14.09	1.28837	11	56.37
GLNA_HUMAN	Glutamine synthetase	42.0	6.5	88.6	3	9.7	443.67	1	4	29.76	0.533981	4	64.32	0.651163	4	63.19
GLOD4_HUMAN	Glyoxalase domain-containing protein 4	34.8	5.3	73.4	2	6.1	35.22	1.41026	2	7.21	2.5534	2	38.84	2.24186	2	47.01
GLRX1_HUMAN	Glutaredoxin-1	11.8	9.7	299.5	5	43.4	22.08	1.74359	40	56	1.3301	40	28.86	0.939535	40	42.21
GLU2B_HUMAN	Glucosidase 2 subunit beta	59.4	4.2	323.8	6	12.9	12.00	0.564103	11	35.37	0.61165	12	29.71	1.14884	12	55.08
GML_HUMAN	Glycosyl-phosphatidylinositol-anchored molecule-like protein	17.7	6.1	29.4	1	9.5	16.82	2.74359	2	24.74	1.41748	2	23.99	0.637209	2	0.72
GNA11_HUMAN	Guanine nucleotide-binding protein subunit alpha-11	42.1	5.4	275.9	5	14.2	28.16	0.717949	6	192.02	0.631068	8	57.09	1.21395	6	78.61
GNAI1_HUMAN	Guanine nucleotide-binding protein G(i) subunit alpha-1	40.3	5.6	461.4	8	24.3	9.85	0.384615	21	61.42	0.330097	20	23.13	1.15814	20	33.36
GNAI2_HUMAN	Guanine nucleotide-binding protein G(i) subunit alpha-2	40.4	5.2	427.3	7	24.2	16.32	0.410256	26	60.58	0.417476	26	45.37	1.31628	25	38.48
GNAS1_HUMAN	Guanine nucleotide-binding protein G(s) subunit alpha isoforms XLas	111.0	4.8	179.1	3	3.3	12.14	0.410256	11	55.71	0.349515	11	24.79	1.05581	11	37.69
GNAS2_HUMAN	Guanine nucleotide-binding protein G(s) subunit alpha isoforms short	45.6	5.5	176.6	4	10.4	12.41	0.410256	12	53.2	0.359223	12	26.97	1.08372	12	37.16
GNS_HUMAN	N-acetylglucosamine-6-sulfatase	62.0	9.4	928.3	15	34.1	14.71	1.87179	100	48.81	1.06796	99	48.41	0.716279	102	26
GOGA3_HUMAN	Golgin subfamily A member 3	167.3	5.2	128.9	4	1.5	14.33	0.923077	13	39.76	0.718447	13	59.45	1.00465	14	42.01
GOLM1_HUMAN	Golgi membrane protein 1	45.3	4.8	528.3	9	28.2	13.83	0.384615	50	49.53	0.174757	49	62.93	0.548837	49	60.26
GP155_HUMAN	Integral membrane protein GPR155	96.9	6.5	41.2	1	1.0	32.44	0.333333	2	31.4	0.262136	2	12.67	0.925581	2	45.39
GP180_HUMAN	Integral membrane protein GPR180	49.4	7.2	140.9	2	4.8	19.12	0.871795	7	11.42	0.563107	7	12.85	0.776744	7	10.95
GP1BA_HUMAN	Platelet glycoprotein Ib alpha chain	68.9	6.2	105.8	2	3.4	343.17	1.4359	7	22.18	1	7	29.44	0.855814	7	31.02
GPAT3_HUMAN	Glycerol-3-phosphate acyltransferase 3	48.7	9.8	27.3	1	2.1	61.64	0.153846	2	7.48	0.116505	2	0.16	0.962791	2	7.64
GPC1_HUMAN	Glypican-1	61.6	7.8	97.6	2	6.1	14.66	1.4359	3	34.13	0.825243	3	19.54	0.711628	3	13.95
GPC5B_HUMAN	G-protein coupled receptor family C group 5 member B	44.8	9.6	515	7	15.6	10.23	0.512821	18	68.34	0.242718	19	55.69	0.595349	18	59.16
GPC5C_HUMAN	G-protein coupled receptor family C group 5 member C	48.2	9.6	671	11	26.8	12.05	0.410256	35	40.87	0.203883	35	51.64	0.595349	33	35.31
GPC6_HUMAN	Glypican-6	62.7	5.2	113	3	2.9	49.29	4.05128	11	17.97	0.737864	12	50.04	0.255814	12	45.11
GPDA_HUMAN	Glycerol-3-phosphate dehydrogenase [NAD(+)], cytoplasmic	37.5	5.8	37.4	1	2.9	539.32	0.589744	2	7.77	0.679612	2	9.17	1.44186	2	17.04
GPVI_HUMAN	Platelet glycoprotein VI	36.8	10.1	114.4	2	8.8	8.46	0.74359	7	40.36	0.417476	7	31.41	0.688372	7	38.46
GPX3_HUMAN	Glutathione peroxidase 3	25.6	9.1	375.5	8	28.3	16.29	0.846154	55	23.82	0.504854	54	28.73	0.706977	53	24.38
GRAM3_HUMAN	GRAM domain-containing protein 3	47.8	9.0	31.5	1	1.6	20.91	1.61538	3	8.35	4.02913	3	13.47	3.06047	3	6.54
GRB1L_HUMAN	GREB1-like protein	214.2	6.2	66.4	2	1.1	27.64	0.410256	4	111.62	0.368932	4	68.04	1.13023	4	47.61
GRB2_HUMAN	Growth factor receptor-bound protein 2	25.2	5.9	112.1	3	9.7	234.34	0.769231	5	68.82	1.16505	5	13.76	1.86977	5	73.01
GRP78_HUMAN	78 kDa glucose-regulated protein	72.3	4.9	868.4	16	27.8	11.06	0.666667	57	74.43	1.08738	58	25.86	1.90698	59	87.24
GSH1_HUMAN	Glutamate--cysteine ligase catalytic subunit	72.7	5.7	25.7	1	1.6	743.97	1.87179	3	8.2	2.70874	3	10.45	1.77674	3	5.81
GSHB_HUMAN	Glutathione synthetase	52.4	5.6	144.3	3	9.3	14.26	0.769231	4	20.19	0.854369	4	35.26	1.3907	4	16.07
GSHR_HUMAN	Glutathione reductase, mitochondrial	56.2	9.6	74.4	2	7.9	16.55	0.538462	8	106	0.883495	10	32.26	2.10233	8	77.28
GSTA1_HUMAN	Glutathione S-transferase A1	25.6	9.4	402.6	8	26.6	18.71	0.410256	25	55.86	1.07767	26	33.94	3.27442	25	39.09
GSTA5_HUMAN	Glutathione S-transferase A5	25.7	8.8	231.4	5	14.9	25.25	0.538462	15	43.6	1.34951	14	14.99	3.10698	14	42.32
GSTM3_HUMAN	Glutathione S-transferase Mu 3	26.5	5.2	188.5	4	15.6	11.57	0.564103	8	35.62	0.466019	8	20.38	1.0186	8	30.05
GSTM5_HUMAN	Glutathione S-transferase Mu 5	25.7	7.7	128.7	3	17.4	6.72	0.333333	6	59.08	1.26214	6	41.54	4.56279	6	117.85
GSTO1_HUMAN	Glutathione S-transferase omega-1	27.5	6.3	214.9	6	24.1	13.55	0.512821	17	57.85	1.06796	17	24.61	2.56279	17	59.32
GSTP1_HUMAN	Glutathione S-transferase P	23.3	5.3	773.7	11	64.3	17.10	0.589744	45	68.04	0.990291	46	40.12	2.05581	45	59.27
GTR5_HUMAN	Solute carrier family 2, facilitated glucose transporter member 5	54.9	5.7	182	3	6.4	19.46	0.461538	16	73.07	0.398058	16	25.96	1.06977	16	51.68
GUC2A_HUMAN	Guanylin	12.4	4.4	303.6	6	45.2	12.69	1.76923	25	42.81	0.553398	26	96.05	0.353488	37	61.12
GUC2B_HUMAN	Guanylate cyclase activator 2B	12.1	6.1	282.5	5	49.1	58.45	3.28205	20	52.85	2.03883	20	44.99	0.744186	21	24.24
H2B1K_HUMAN	Histone H2B type 1-K	13.9	10.8	225.6	3	26.2	14.11	0.487179	33	101.59	2.49515	33	31.35	6.34884	33	125.62
H33_HUMAN	Histone H3.3	15.3	11.9	80.2	2	10.3	13.01	0.333333	5	13.19	1.92233	5	9.27	7.29302	5	11.2
H4_HUMAN	Histone H4	11.4	11.8	382.9	7	50.5	19.68	0.692308	38	122.92	2.16505	39	48.94	3.81395	38	129.43
H90B4_HUMAN	Putative heat shock protein HSP 90-beta 4	58.2	4.5	99.1	3	5.9	17.28	0.897436	4	53.46	1.79612	4	17.83	2.44651	4	46.76
HABP2_HUMAN	Hyaluronan-binding protein 2	62.6	6.1	209.7	3	5.2	16.03	6.66667	6	19.16	3.4466	6	16.06	0.637209	6	13.14
HAVR2_HUMAN	Hepatitis A virus cellular receptor 2	33.4	5.4	529.4	12	27.9	12.84	2.02564	52	164.61	1.24272	54	175.69	0.702326	60	42.78
HBA_HUMAN	Hemoglobin subunit alpha	15.2	9.4	3786.4	49	95.8	18.62	1.38462	652	77.38	9.47573	688	147.8	6.13953	591	152.08
HBB_HUMAN	Hemoglobin subunit beta	16.0	6.9	3571.9	43	95.2	16.07	1.46154	1002	69.78	9.33981	1033	133.02	6.29302	910	128.98
HBD_HUMAN	Hemoglobin subunit delta	16.0	9.1	2679	34	92.5	15.69	1.35897	552	74.98	10.5243	576	150.24	7.71163	497	138.25
HBE_HUMAN	Hemoglobin subunit epsilon	16.2	9.4	282.7	6	26.5	14.78	1.23077	32	67.71	14.8835	40	117.76	6.81395	21	225.8
HBG1_HUMAN	Hemoglobin subunit gamma-1	16.1	6.8	1149.5	19	93.9	15.14	1.30769	129	68.28	9.70874	139	104.72	7.52093	111	110
HBG2_HUMAN	Hemoglobin subunit gamma-2	16.1	6.8	1111.3	18	93.9	15.22	1.41026	129	62.18	9.19417	137	103.36	7.17674	115	106.13
HD_HUMAN	Huntingtin	347.4	5.8	33.6	1	0.3	10.69	6.07692	4	10.04	3.01942	4	13.02	0.609302	4	14.86
HDGF_HUMAN	Hepatoma-derived growth factor	26.8	4.6	115.9	2	10.8	6.72	1.53846	3	24.55	2.20388	3	32.6	1.76279	3	52.04
HEAT6_HUMAN	HEAT repeat-containing protein 6	128.7	6.7	32.2	1	0.8	21.36	1.15385	2	31.26	2.23301	2	1.75	2.3907	2	29.39
HEBP2_HUMAN	Heme-binding protein 2	22.9	4.4	132.4	3	18.5	10.73	1.12821	20	28.81	0.76699	21	40.79	0.781395	21	33.47
HECD1_HUMAN	E3 ubiquitin-protein ligase HECTD1	289.2	5.1	58.8	2	0.4	356.15	4.33333	4	13.61	2.57282	4	9.21	0.730233	4	20.05
HEG1_HUMAN	Protein HEG homolog 1	147.4	5.8	107.4	2	1.8	31.31	1.12821	3	36.48	0.543689	3	26.19	0.586047	3	10.76
HEM2_HUMAN	Delta-aminolevulinic acid dehydratase	36.3	6.4	30.8	1	3.0	3.65	0.153846	3	11.45	1.17476	4	32.81	7.47907	3	18.55
HEMGN_HUMAN	Hemogen	55.3	4.7	25.2	1	2.3	42.44	1.41026	2	19.55	0.737864	2	8.05	0.637209	2	11.37
HEMO_HUMAN	Hemopexin	51.6	6.6	3267.2	49	68.8	17.07	4.89744	609	80.61	3.54369	613	82.03	0.897674	614	26.24
HEP2_HUMAN	Heparin cofactor 2	57.0	6.4	948.1	18	37.5	15.70	2.46154	65	54.37	3.54369	65	66.4	1.72093	64	46.09
HEXA_HUMAN	Beta-hexosaminidase subunit alpha	60.7	4.9	631.6	13	26.7	11.24	1	50	54.21	0.660194	50	41.65	0.795349	49	29.43
HEXB_HUMAN	Beta-hexosaminidase subunit beta	63.1	6.3	957.2	16	31.1	11.16	1.02564	68	47.3	0.776699	69	30.58	0.990698	67	32.97
HFM1_HUMAN	Probable ATP-dependent DNA helicase HFM1	162.5	6.7	79.6	2	0.9	30.47	0.897436	2	9.41	2.48544	2	48.45	3.43721	2	59.83
HGFA_HUMAN	Hepatocyte growth factor activator	70.6	7.3	147.6	3	6.4	9.18	1.38462	4	40.43	1.18447	4	40.78	1.05116	4	27.7
HMCN1_HUMAN	Hemicentin-1	613.0	6.1	519.6	8	1.7	14.28	0.846154	86	40.93	0.436893	86	49.92	0.627907	88	31
HMCN2_HUMAN	Hemicentin-2	542.3	5.5	153.5	3	0.7	22.23	0.692308	13	26.48	0.669903	13	44.9	1.1814	13	71.98
HMGCL_HUMAN	Hydroxymethylglutaryl-CoA lyase, mitochondrial	34.3	9.7	27.3	1	3.7	19.51	2.66667	2	11.92	3.13592	2	5.01	1.45116	2	6.88
HMMR_HUMAN	Hyaluronan mediated motility receptor	84.0	5.6	119.1	2	1.9	16.50	9.87179	8	99.75	8.3301	8	38.87	1.03721	8	51.99
HORM1_HUMAN	HORMA domain-containing protein 1	45.2	5.6	26.8	1	3.0	667.21	0.871795	2	30.51	1.05825	2	4.62	1.47442	2	25.61
HPRT_HUMAN	Hypoxanthine-guanine phosphoribosyltransferase	24.6	6.2	111.6	2	9.2	8.85	0.282051	7	78.04	1.02913	7	19.13	4.30698	7	81.67
HPT_HUMAN	Haptoglobin	45.2	6.1	3970.6	60	69.0	13.68	3.23077	639	85.73	9.42718	628	148.88	3.75814	637	67.34
HPTR_HUMAN	Haptoglobin-related protein	39.0	6.7	2394.1	32	42.8	15.30	3.4359	356	88.1	10.7864	348	135.03	4.04651	353	59.5
HRG_HUMAN	Histidine-rich glycoprotein	59.5	7.2	1012.6	17	26.9	17.77	4.74359	126	57.59	4.73786	130	66.43	1.25116	127	39.66
HS90A_HUMAN	Heat shock protein HSP 90-alpha	84.6	4.8	772.3	16	20.4	11.92	0.717949	39	52.35	1.42718	41	34.97	2.50233	40	84.59
HS90B_HUMAN	Heat shock protein HSP 90-beta	83.2	4.8	583.1	10	14.2	11.49	0.871795	28	69.58	1.40777	28	39.07	2.00465	28	85.64
HSB11_HUMAN	Heat shock protein beta-11	16.3	4.8	129.6	2	27.8	27.23	1.82051	6	33.5	1.28155	6	25.09	0.865116	6	47.06
HSP71_HUMAN	Heat shock 70 kDa protein 1A/1B	70.0	5.4	1251.8	19	39.3	10.99	0.589744	98	71.32	0.980583	96	30.73	2.02326	98	69.57
HSP7C_HUMAN	Heat shock cognate 71 kDa protein	70.9	5.2	1390.2	23	36.1	11.93	0.615385	123	59.4	1.00971	124	44.36	2.0186	124	62.08
HSPB1_HUMAN	Heat shock protein beta-1	22.8	6.0	343	5	30.2	12.85	0.512821	13	113.49	0.407767	13	40.37	0.967442	13	68.95
HTR5A_HUMAN	HEAT repeat-containing protein 5A	221.9	6.1	53.9	2	0.8	547.17	2.53846	3	20.21	0.533981	4	66.18	0.367442	3	24.92
HV101_HUMAN	Ig heavy chain V-I region EU	12.5	7.0	83	1	10.3	13.45	0.820513	4	11.74	1.1165	4	16.75	1.68372	4	27.32
HV103_HUMAN	Ig heavy chain V-I region V35	13.0	10.1	88.2	2	21.4	10.61	1.66667	6	21.44	1.33981	6	11.37	0.986047	6	14.07
HV209_HUMAN	Ig heavy chain V-II region ARH-77	16.2	9.3	155.2	2	17.1	14.86	1.25641	31	37.93	1.76699	31	41.52	1.73023	31	17.67
HV301_HUMAN	Ig heavy chain V-III region TRO	13.5	10.2	249.6	2	15.6	13.78	1.53846	40	26.83	1.73786	41	26.99	1.45116	42	31.27
HV304_HUMAN	Ig heavy chain V-III region TIL	12.3	0.0	203.8	2	26.1	15.24	1.05128	13	83.09	1.58252	13	89.97	2.00465	12	19.08
HV305_HUMAN	Ig heavy chain V-III region BRO	13.2	7.0	199	2	25.0	14.67	1.28205	16	72.13	1.97087	16	59.78	2.0186	15	21.23
HV306_HUMAN	Ig heavy chain V-III region BUT	12.4	10.0	112.2	3	35.7	11.71	1.92308	17	30.43	2.25243	18	42.38	1.55814	18	36.79
HV307_HUMAN	Ig heavy chain V-III region CAM	13.7	10.1	173.6	4	23.8	10.92	1.58974	26	39.03	2.45631	25	26.4	1.73953	25	24.29
HV308_HUMAN	Ig heavy chain V-III region GA	13.2	10.3	105.3	2	24.6	13.68	1.92308	9	45.83	2.73786	9	41.36	1.74884	9	12.52
HV310_HUMAN	Ig heavy chain V-III region HIL	13.6	9.9	43.3	1	13.2	53.57	2.35897	6	99.23	0.990291	6	93.09	0.516279	6	17.81
HV312_HUMAN	Ig heavy chain V-III region BUR	13.0	10.2	31.4	1	6.7	836.97	1.5641	2	6.38	1.08738	2	2.15	0.855814	2	8.54
HV318_HUMAN	Ig heavy chain V-III region TUR	12.4	10.6	185.2	2	26.7	13.11	1.07692	16	80.03	2.32039	17	123.33	2.37674	16	66.4
HV319_HUMAN	Ig heavy chain V-III region JON	12.6	10.2	74	1	16.5	5.17	1.07692	10	37.73	0.970874	10	42	1.08837	10	5.56
HV320_HUMAN	Ig heavy chain V-III region GAL	12.7	9.6	156.4	4	26.7	9.78	1.17949	22	31.86	1.4466	22	16.89	1.50233	22	20.71
HYOU1_HUMAN	Hypoxia up-regulated protein 1	111.3	5.0	141.8	2	4.0	14.57	2.89744	4	14.73	1.45631	4	1.74	0.618605	4	16.49
I10R2_HUMAN	Interleukin-10 receptor subunit beta	37.0	4.9	138.8	3	11.7	10.84	0.692308	7	37.1	0.252427	7	43.64	0.437209	7	53.03
I13R1_HUMAN	Interleukin-13 receptor subunit alpha-1	48.7	5.6	49.2	1	3.0	17.76	0.538462	7	68.17	0.446602	7	18.97	1.01395	7	72.34
I18BP_HUMAN	Interleukin-18-binding protein	21.1	8.0	181.7	3	14.9	19.45	0.153846	29	88.59	0.0970874	28	54.5	0.851163	28	79.49
IBP1_HUMAN	Insulin-like growth factor-binding protein 1	27.9	5.0	148	3	11.6	17.78	0.923077	8	125.17	0.786408	8	88.61	1.04186	8	40.95
IBP2_HUMAN	Insulin-like growth factor-binding protein 2	34.8	8.9	478.6	8	31.7	9.99	0.974359	28	253.34	0.864078	32	133.16	1.18605	28	124
IBP3_HUMAN	Insulin-like growth factor-binding protein 3	31.7	10.2	215.2	4	16.2	13.92	5.41026	53	103.08	5.23301	54	106.72	1.2	53	34.47
IBP4_HUMAN	Insulin-like growth factor-binding protein 4	27.9	7.0	279.5	5	25.6	15.41	1.41026	35	73.66	0.990291	35	63.95	0.855814	35	72.06
IBP5_HUMAN	Insulin-like growth factor-binding protein 5	30.5	9.8	168.5	3	13.6	8.98	1.30769	19	71.89	1.83495	19	42.5	1.6093	18	41.66
IBP6_HUMAN	Insulin-like growth factor-binding protein 6	25.3	9.8	186.6	2	10.4	8.70	1.4359	16	127.33	1.34951	15	46.89	1.02791	16	87.03
IBP7_HUMAN	Insulin-like growth factor-binding protein 7	29.1	9.6	359.6	6	17.4	16.38	0.230769	29	65.86	0.300971	29	50.27	1.6186	29	56.37
IC1_HUMAN	Plasma protease C1 inhibitor	55.1	6.1	2299.5	33	39.4	17.64	0.948718	225	51.86	1.2233	235	38.54	1.5814	226	52.42
ICAM1_HUMAN	Intercellular adhesion molecule 1	57.8	9.4	80.6	2	3.9	16.96	0.846154	2	6.48	0.669903	2	11.32	0.967442	2	17.9
ICAM2_HUMAN	Intercellular adhesion molecule 2	30.6	7.9	219.3	3	14.9	24.69	0.358974	20	77.48	0.291262	21	76.31	1.06512	20	61.55
ICOSL_HUMAN	ICOS ligand	33.3	5.0	385.2	7	13.2	13.77	0.410256	65	39.27	0.23301	66	42.01	0.697674	66	36.95
IDH3A_HUMAN	Isocitrate dehydrogenase [NAD] subunit alpha, mitochondrial	39.6	6.5	73.9	2	2.7	24.16	15.5897	20	46.8	10.2233	20	43.45	0.804651	20	8.29
IDHC_HUMAN	Isocitrate dehydrogenase [NADP] cytoplasmic	46.6	6.6	464	8	22.7	16.93	0.820513	36	63.77	2.05825	38	28.14	3.17674	37	71.19
IDS_HUMAN	Iduronate 2-sulfatase	61.8	5.1	216.9	3	5.3	8.84	1.02564	7	38.76	0.543689	7	34.17	0.651163	7	11.11
IF4G3_HUMAN	Eukaryotic translation initiation factor 4 gamma 3	176.5	5.1	34.2	1	0.8	26.82	2.87179	3	4.59	0.961165	3	37.85	0.409302	3	32.84
IF5A1_HUMAN	Eukaryotic translation initiation factor 5A-1	16.8	4.9	101.1	2	7.8	13.60	0.717949	4	20.84	0.825243	4	12.34	1.42791	4	14.76
IF6_HUMAN	Eukaryotic translation initiation factor 6	26.6	4.4	307.7	3	27.3	7.61	0.692308	19	63.63	0.631068	19	69.8	1.10698	19	40.88
IFNE_HUMAN	Interferon epsilon	24.4	9.5	54.8	2	9.1	37.31	0.74359	2	401.56	0.271845	2	1240.87	0.455814	2	60.73
IGF2_HUMAN	Insulin-like growth factor II	20.1	10.8	138.7	3	17.2	13.12	1.64103	16	54.68	2.97087	16	91.71	2.20465	16	96.67
IGHA1_HUMAN	Ig alpha-1 chain C region	37.6	6.1	2526.4	33	60.9	13.28	1.92308	699	56.41	2.08738	706	57.56	1.3814	733	57.04
IGHA2_HUMAN	Ig alpha-2 chain C region	36.5	5.7	1934.9	26	61.5	12.54	1.69231	494	57.5	2.08738	514	69.26	1.48372	511	76.14
IGHG1_HUMAN	Ig gamma-1 chain C region	36.1	9.4	2764.8	34	63.3	14.88	1.10256	419	65.11	0.825243	420	90.39	0.930233	420	39.21
IGHG2_HUMAN	Ig gamma-2 chain C region	35.9	8.8	1790	24	48.2	13.37	1.20513	383	56.49	1.04854	385	77.79	1.06512	377	37.21
IGHG3_HUMAN	Ig gamma-3 chain C region	41.3	9.4	1398.6	22	48.3	14.89	1.30769	314	70.22	1.09709	312	94.95	1.05116	307	38.5
IGHG4_HUMAN	Ig gamma-4 chain C region	35.9	7.8	1972.3	27	46.5	13.20	1.51282	262	70.21	1.41748	265	95.19	1.16279	260	39.38
IGHM_HUMAN	Ig mu chain C region	49.3	6.4	1763.8	27	50.2	17.37	1.30769	310	54.74	5.15534	340	149.04	4.07907	308	147.43
IGJ_HUMAN	Immunoglobulin J chain	18.1	5.0	1166.1	16	63.5	11.84	0.897436	130	63.93	2.45631	130	62.55	3.30698	130	75.34
IGKC_HUMAN	Ig kappa chain C region	11.6	5.5	4139.4	45	86.8	12.78	2.35897	2353	51.29	1.54369	2392	48.18	0.804651	2370	39.05
IGLL1_HUMAN	Immunoglobulin lambda-like polypeptide 1	22.9	11.1	236.8	5	14.6	14.90	0.897436	34	39.35	0.640777	35	41.66	0.902326	35	29.14
IGLL5_HUMAN	Immunoglobulin lambda-like polypeptide 5	23.0	10.0	1769.8	24	45.8	14.71	2.92308	617	65.05	2.18447	637	74.27	0.953488	624	35.43
IGSF8_HUMAN	Immunoglobulin superfamily member 8	65.0	9.1	425.6	7	11.7	14.25	1.41026	50	30.03	0.737864	49	26.3	0.64186	50	32.75
IIGP5_HUMAN	Interferon-inducible GTPase 5	50.3	5.1	57	1	2.2	10.44	1.30769	3	6.21	1.1165	3	9.78	1.04651	3	15.36
IL12A_HUMAN	Interleukin-12 subunit alpha	24.9	6.3	25.7	1	5.0	609.21	2.92308	2	26.88	2.48544	2	1.91	1.04651	2	24.88
IL1AP_HUMAN	Interleukin-1 receptor accessory protein	65.4	9.2	112.8	3	5.1	422.04	0.897436	8	25.29	0.368932	8	68.46	0.506977	8	45.54
IL1RA_HUMAN	Interleukin-1 receptor antagonist protein	20.0	5.8	396.1	6	34.5	15.22	0.384615	31	86.3	0.165049	32	53.22	0.483721	29	26.4
IL6RB_HUMAN	Interleukin-6 receptor subunit beta	103.5	5.6	269.8	5	5.7	26.72	0.641026	16	26.41	0.359223	16	29.29	0.688372	16	15.05
ILEU_HUMAN	Leukocyte elastase inhibitor	42.7	5.9	1580	23	61.5	17.03	0.307692	187	55.82	0.320388	185	33.47	1.2186	184	50.15
INADL_HUMAN	InaD-like protein	196.2	4.7	73.7	2	1.0	18.70	8.53846	8	14.79	2.07767	8	8.32	0.297674	8	7.69
INAR2_HUMAN	Interferon alpha/beta receptor 2	57.7	4.2	119.3	2	3.5	8.44	1.64103	8	27.14	1.16505	8	16.87	0.874419	8	19.58
INVO_HUMAN	Involucrin	68.4	4.5	115.9	2	5.1	16.36	0.205128	2	53.68	0.0970874	2	24.08	0.627907	2	27.05
INVS_HUMAN	Inversin	117.8	10.1	129.6	4	2.1	45.73	14.3846	20	74.25	5.43689	20	46.88	0.465116	20	49.65
IPSP_HUMAN	Plasma serine protease inhibitor	45.6	9.8	1535.9	24	49.0	13.07	0.410256	203	62.6	0.349515	209	36.89	1.04651	199	40.75
IQEC2_HUMAN	IQ motif and SEC7 domain-containing protein 2	161.6	9.5	27	1	0.6	778.87	0.74359	2	3.54	0.38835	2	1.41	0.637209	2	2.13
IQGA1_HUMAN	Ras GTPase-activating-like protein IQGAP1	189.1	6.1	211.3	4	3.7	22.34	1.69231	7	71.86	1.21359	7	40.72	0.87907	7	39.06
IRF4_HUMAN	Interferon regulatory factor 4	51.7	6.4	43	1	2.7	707.09	0.282051	4	47.15	0.135922	4	46.19	0.572093	4	6.87
IRF5_HUMAN	Interferon regulatory factor 5	56.0	5.5	28.2	1	2.4	5.08	0.25641	2	7.39	0.165049	2	24.95	0.748837	2	32.79
IRF7_HUMAN	Interferon regulatory factor 7	54.2	5.9	30.4	1	1.8	803.29	3.87179	8	28.59	0.92233	8	21.18	0.293023	8	19.38
ISK1_HUMAN	Pancreatic secretory trypsin inhibitor	8.5	9.2	240.6	5	53.2	22.12	1.15385	17	153.41	2.15534	17	165.71	2.27907	17	51
ISK5_HUMAN	Serine protease inhibitor Kazal-type 5	120.6	9.6	161.5	3	3.2	11.78	0.435897	10	65.12	0.300971	10	53.34	0.851163	10	22.74
ISLR_HUMAN	Immunoglobulin superfamily containing leucine-rich repeat protein	46.0	4.9	291.9	4	15.9	15.36	0.871795	13	65.84	1.12621	14	51.17	1.54419	13	41.99
IST1_HUMAN	IST1 homolog	39.7	5.1	540.9	10	24.2	16.13	0.435897	29	72.64	0.271845	30	67.57	0.693023	31	59.64
ITAM_HUMAN	Integrin alpha-M	127.1	7.0	87.4	2	2.2	6.08	0.230769	2	172.43	1.1068	6	89.06	3.15349	2	12.71
ITIH1_HUMAN	Inter-alpha-trypsin inhibitor heavy chain H1	101.3	6.3	1819	27	33.8	13.51	2.38462	148	66.5	5.63107	151	117.17	2.88372	153	79.47
ITIH2_HUMAN	Inter-alpha-trypsin inhibitor heavy chain H2	106.4	6.4	2023.1	32	38.9	13.30	3.12821	220	75.45	6.35922	222	115.98	2.56744	225	64.74
ITIH3_HUMAN	Inter-alpha-trypsin inhibitor heavy chain H3	99.8	5.4	956.5	15	21.7	14.53	3.35897	38	77.4	5.09709	41	89.97	1.9814	45	55.11
ITIH4_HUMAN	Inter-alpha-trypsin inhibitor heavy chain H4	103.3	6.5	4106.6	58	51.3	13.98	1.51282	571	68.43	1.67961	570	67.93	1.42791	569	37.92
ITLN1_HUMAN	Intelectin-1	34.9	5.6	337.4	6	18.5	103.47	1.69231	16	39	3.33981	16	44.55	2.47907	16	38.26
ITM2B_HUMAN	Integral membrane protein 2B	30.3	4.9	118.9	2	7.5	7.67	1.23077	5	14.51	0.553398	5	20.1	0.548837	5	33.05
IV4F8_HUMAN	Putative V-set and immunoglobulin domain-containing-like protein IGHV4OR15-8	13.6	10.3	67.2	2	10.6	27.01	1.51282	4	8.76	2.06796	4	11.38	1.66047	4	15.28
IVD_HUMAN	Isovaleryl-CoA dehydrogenase, mitochondrial	46.3	9.3	28	1	3.1	14.34	1.84615	3	36.41	2.66019	3	7.09	1.76744	3	34.19
JAG1_HUMAN	Protein jagged-1	133.7	5.7	53.7	1	0.5	35.57	0.307692	2	17.51	1.71845	2	26.35	6.96279	2	8.55
JAM1_HUMAN	Junctional adhesion molecule A	32.6	9.1	140.7	3	14.0	23.07	0.538462	10	23.9	0.368932	10	37.59	0.851163	10	29.83
JAM3_HUMAN	Junctional adhesion molecule C	35.0	8.8	242.3	6	16.5	12.61	1.05128	11	29.2	0.621359	12	36.13	0.716279	11	59.54
JAML1_HUMAN	Junctional adhesion molecule-like	44.3	6.8	95	2	6.1	19.82	1.46154	6	102.96	0.631068	6	53.74	0.525581	6	36.48
JERKY_HUMAN	Jerky protein homolog	57.4	9.5	27.8	1	2.7	527.05	7.41026	2	26.41	3.46602	2	35.95	0.576744	2	8.91
JKIP2_HUMAN	Janus kinase and microtubule-interacting protein 2	94.9	5.8	59.2	1	1.0	733.50	0.641026	3	9.06	0.223301	3	14.23	0.427907	3	5.36
K1107_HUMAN	Uncharacterized protein KIAA1107	155.6	5.8	57.7	2	1.2	769.30	4.53846	4	162.72	0.970874	4	202.23	0.265116	4	15.77
K1109_HUMAN	Uncharacterized protein KIAA1109	555.1	6.1	59.8	2	0.3	536.54	9.58974	3	58.36	2.67961	3	45.79	0.344186	3	12.61
K1683_HUMAN	Uncharacterized protein KIAA1683	127.6	11.6	110.8	2	2.1	50.62	7.92308	4	533.36	6.58252	4	220.1	1.0186	4	55.68
K1751_HUMAN	Uncharacterized protein KIAA1751	86.9	5.3	27.1	1	1.0	20.84	0.974359	2	12.52	4.19417	2	10.19	5.33953	2	2.31
K1C10_HUMAN	Keratin, type I cytoskeletal 10	58.8	5.0	3781	54	56.7	12.23	0.358974	312	81.66	0.223301	320	91.53	0.725581	312	55.33
K1C12_HUMAN	Keratin, type I cytoskeletal 12	53.5	4.6	360.4	7	9.9	13.71	0.435897	44	119.03	0.223301	41	62.66	0.804651	43	55.8
K1C13_HUMAN	Keratin, type I cytoskeletal 13	49.6	4.8	2311.8	41	51.7	12.78	0.205128	262	127.62	0.126214	272	132.12	0.781395	267	57.67
K1C14_HUMAN	Keratin, type I cytoskeletal 14	51.5	4.9	897	18	23.9	12.23	0.333333	116	60.02	0.368932	119	107.96	1.26977	116	91.81
K1C18_HUMAN	Keratin, type I cytoskeletal 18	48.0	5.2	1044.7	18	33.5	11.39	1.07692	68	109.36	1.66019	69	96.63	1.96744	67	84.13
K1C19_HUMAN	Keratin, type I cytoskeletal 19	44.1	4.9	1996.2	31	61.2	13.26	0.589744	177	99.43	1.06796	184	193.95	2.15349	179	120.88
K1C20_HUMAN	Keratin, type I cytoskeletal 20	48.5	5.4	817.5	16	32.8	10.87	0.897436	75	161.41	1.54369	79	229.87	1.97209	74	99.12
K1C9_HUMAN	Keratin, type I cytoskeletal 9	62.0	5.0	2692.7	38	53.9	11.75	0.435897	140	98.31	0.213592	138	94.94	0.613953	136	54.17
K22E_HUMAN	Keratin, type II cytoskeletal 2 epidermal	65.4	8.9	2729.8	44	59.5	12.10	0.333333	194	97.24	0.23301	204	145.85	0.767442	196	94.23
K2C1_HUMAN	Keratin, type II cytoskeletal 1	66.0	8.8	3562.9	56	53.1	12.13	0.358974	290	109.7	0.213592	291	146.11	0.646512	279	62.29
K2C4_HUMAN	Keratin, type II cytoskeletal 4	57.2	6.2	1432.2	24	37.1	13.90	0.179487	101	76.39	0.135922	102	134.9	0.827907	101	104.9
K2C5_HUMAN	Keratin, type II cytoskeletal 5	62.3	8.6	1556.4	32	34.1	12.08	0.179487	142	86.43	0.194175	141	76.68	1.43721	141	73.49
K2C6A_HUMAN	Keratin, type II cytoskeletal 6A	60.0	8.9	2283	41	46.5	12.77	0.179487	193	106.76	0.194175	197	84.08	1.30698	195	73.5
K2C6B_HUMAN	Keratin, type II cytoskeletal 6B	60.0	8.9	2238	39	43.4	12.70	0.179487	186	104.6	0.194175	190	88.22	1.30233	189	71.77
K2C7_HUMAN	Keratin, type II cytoskeletal 7	51.4	5.3	1108.3	22	36.0	13.00	0.410256	71	142.48	0.990291	71	176.36	2.9907	71	85.6
K2C78_HUMAN	Keratin, type II cytoskeletal 78	56.8	5.7	139.4	4	5.8	13.78	0.282051	20	81.02	0.485437	20	325.42	2.14884	20	179.31
K2C8_HUMAN	Keratin, type II cytoskeletal 8	53.7	5.4	1812.3	34	49.5	12.67	0.615385	138	152.7	1.78641	140	210.07	3.37209	136	116.68
K319L_HUMAN	Dyslexia-associated protein KIAA0319-like protein	115.6	5.7	109.1	2	1.7	6.06	0.307692	5	82.97	0.15534	5	52.67	0.6	5	27.18
K6PL_HUMAN	6-phosphofructokinase, liver type	85.0	7.9	191.5	3	7.2	11.32	1.30769	4	85.06	1.94175	4	36.91	1.43721	5	118.43
KAIN_HUMAN	Kallistatin	48.5	8.0	408.2	7	22.5	20.54	1.87179	20	44.13	0.932039	20	40.85	0.613953	20	31.19
KBTB4_HUMAN	Kelch repeat and BTB domain-containing protein 4	58.1	5.3	33.2	1	1.5	923.87	3.79487	2	11.86	0.737864	2	36.27	0.237209	2	23.66
KCRB_HUMAN	Creatine kinase B-type	42.6	5.2	404.3	6	21.0	10.86	1.15385	14	32.98	2.61165	14	59.91	2.45581	15	70.97
KCY_HUMAN	UMP-CMP kinase	22.2	5.3	99.8	3	25.0	23.48	1.17949	3	53.24	1.1068	3	60.56	1.15349	3	60
KHK_HUMAN	Ketohexokinase	32.7	5.6	53.3	1	4.0	6.37	0.487179	3	20.54	0.563107	3	15.23	1.45116	3	9.61
KIF6_HUMAN	Kinesin-like protein KIF6	92.5	6.5	86.2	2	2.1	18.37	0.461538	2	83.57	0.592233	2	126.92	1.53953	2	25.59
KIRR1_HUMAN	Kin of IRRE-like protein 1	83.5	5.4	96.9	1	2.0	12.88	0.615385	4	0.69	0.339806	4	7.8	0.693023	4	8.47
KLAS1_HUMAN	Putative uncharacterized protein KLHL30-AS1	9.7	11.4	27.3	1	9.8	1046.85	0.128205	2	37.88	0.174757	2	2.07	1.65116	2	35.6
KLK1_HUMAN	Kallikrein-1	28.9	4.5	1226.7	17	33.2	13.73	0.230769	139	80.1	0.194175	142	90.24	1.04651	138	49.93
KLK3_HUMAN	Prostate-specific antigen	28.7	9.0	615	10	53.6	15.39	4.61538	37	73.81	5.65049	37	72.1	1.46047	39	24.94
KLK6_HUMAN	Kallikrein-6	26.8	7.9	51.6	1	5.3	36.26	0.435897	2	42.89	0.631068	2	1.47	1.76279	2	41.23
KLKB1_HUMAN	Plasma kallikrein	71.3	9.7	56	2	1.7	12.54	1.61538	2	24.21	0.417476	2	85.24	0.32093	2	126.52
KNG1_HUMAN	Kininogen-1	71.9	6.4	4063.7	57	39.6	14.00	0.589744	650	52.77	0.368932	651	59.27	0.772093	647	33.67
KPYM_HUMAN	Pyruvate kinase isozymes M1/M2	57.9	9.0	888.1	17	33.7	13.37	0.666667	50	52.04	1.12621	52	64.31	1.92093	49	53.76
KRBA1_HUMAN	Protein KRBA1	107.4	9.5	28.9	1	1.3	25.81	6.15385	8	17.28	1.81553	8	35.33	0.362791	8	23.12
KRT85_HUMAN	Keratin, type II cuticular Hb5	55.8	6.3	196.6	4	3.7	20.77	0.974359	13	439.96	0.76699	13	65.45	0.967442	13	189.37
KT222_HUMAN	Keratin-like protein KRT222	34.1	5.6	152.7	2	3.1	14.52	0.384615	7	329.79	0.708738	8	106.16	2.66047	7	93.64
KTBL1_HUMAN	KATNB1-like protein 1	34.7	9.9	59.3	2	6.6	20.47	1.15385	4	61.99	0.902913	4	19.75	0.967442	4	42.19
KV101_HUMAN	Ig kappa chain V-I region AG	12.0	5.6	809.8	8	38.0	14.07	1.92308	83	42.19	1.33981	85	40.42	0.860465	83	36.58
KV102_HUMAN	Ig kappa chain V-I region AU	11.9	5.0	636.8	6	31.5	14.02	2	75	40.16	1.31068	77	40.55	0.795349	76	36.11
KV104_HUMAN	Ig kappa chain V-I region CAR	11.7	0.0	433.9	7	41.1	17.07	1.53846	37	67.84	1.35922	37	65.61	1.08837	37	31.24
KV105_HUMAN	Ig kappa chain V-I region DEE	11.7	16.4	1143.2	14	56.5	17.74	2.20513	85	43.47	1.33981	88	39.67	0.762791	86	40
KV106_HUMAN	Ig kappa chain V-I region EU	11.8	9.2	425.3	6	49.1	11.63	1.5641	43	54.18	1.49515	44	67.59	1.17209	43	26.44
KV107_HUMAN	Ig kappa chain V-I region Gal	11.8	9.6	547	4	16.7	13.85	2.12821	68	42.93	1.35922	69	40.7	0.795349	68	38.21
KV109_HUMAN	Ig kappa chain V-I region HK101 (Fragment)	12.8	9.5	177.3	4	35.0	20.18	1.07692	11	104.71	1.15534	11	118.99	1.29767	11	35.4
KV110_HUMAN	Ig kappa chain V-I region HK102 (Fragment)	12.8	6.9	174	3	34.2	26.75	2.58974	10	56.14	2.12621	10	45.1	1.0093	10	45.67
KV111_HUMAN	Ig kappa chain V-I region Ka	11.9	9.5	155.5	4	38.0	15.04	1.4359	11	30.23	1.38835	11	25.89	1.1907	11	21.68
KV112_HUMAN	Ig kappa chain V-I region Kue	12.1	9.4	150.6	3	20.4	29.05	2.87179	9	17.45	3.04854	9	30.17	1.30233	9	23.46
KV113_HUMAN	Ig kappa chain V-I region Lay	11.8	9.2	99.1	3	31.5	16.20	1.51282	11	57.19	0.902913	11	54.28	0.734884	11	15.8
KV116_HUMAN	Ig kappa chain V-I region Roy	11.8	5.0	555.1	5	24.1	13.95	2.10256	70	42.77	1.35922	71	40.09	0.8	70	38.08
KV117_HUMAN	Ig kappa chain V-I region Scw	11.8	5.6	611.5	5	27.8	13.79	2.17949	77	42.39	1.38835	78	39.97	0.786047	77	36.19
KV118_HUMAN	Ig kappa chain V-I region WEA	11.8	9.6	663.6	7	37.0	13.43	2.07692	82	51.01	1.28155	88	60.55	0.776744	85	52.69
KV120_HUMAN	Ig kappa chain V-I region Mev	11.9	7.0	409.8	5	38.5	127.94	2	17	52.76	1.49515	17	62.64	0.888372	16	11.25
KV121_HUMAN	Ig kappa chain V-I region Ni	12.2	5.1	545.7	6	30.4	12.25	1.25641	42	30.88	1.56311	43	51.37	1.55814	42	46.75
KV122_HUMAN	Ig kappa chain V-I region BAN	11.8	9.4	317.7	5	22.2	179.79	1.38462	15	27.68	1.1068	15	23.48	0.948837	15	21.02
KV123_HUMAN	Ig kappa chain V-I region Walker	14.1	0.0	366.2	8	45.7	28.84	2.58974	20	53.46	2.83495	20	74.52	1.34884	20	38.78
KV202_HUMAN	Ig kappa chain V-II region FR	12.6	9.1	54.6	1	11.5	13.26	1.92308	6	13.63	1.02913	6	7.81	0.660465	6	13.16
KV203_HUMAN	Ig kappa chain V-II region MIL	12.0	0.0	556.1	6	35.7	16.02	2.10256	118	26.94	1.37864	119	33.11	0.8	116	21.44
KV204_HUMAN	Ig kappa chain V-II region TEW	12.3	5.6	674.8	6	35.4	15.35	2.20513	130	30.54	1.36893	131	37.67	0.75814	126	20.34
KV301_HUMAN	Ig kappa chain V-III region B6	11.6	0.0	701.6	10	51.9	14.97	1.87179	96	29.88	1.17476	94	22.76	0.786047	97	32.02
KV302_HUMAN	Ig kappa chain V-III region SIE	11.8	9.5	690.4	8	59.6	13.50	1.79487	164	31	1.18447	169	36.04	0.772093	166	25.02
KV303_HUMAN	Ig kappa chain V-III region NG9 (Fragment)	10.7	7.1	212.8	3	47.0	8.31	2.05128	24	41.37	1.30097	25	39.01	0.776744	23	22.63
KV304_HUMAN	Ig kappa chain V-III region Ti	11.8	9.6	678.3	9	66.1	13.45	1.84615	159	29.65	1.23301	162	32.05	0.781395	160	26.07
KV305_HUMAN	Ig kappa chain V-III region WOL	11.7	9.5	591.2	8	49.5	13.71	1.84615	158	28.07	1.21359	160	29.02	0.767442	157	21.39
KV307_HUMAN	Ig kappa chain V-III region GOL	11.8	0.0	544.1	6	51.4	13.49	1.84615	152	29.23	1.20388	154	30.84	0.776744	152	24.61
KV309_HUMAN	Ig kappa chain V-III region VG (Fragment)	12.6	4.7	225.1	4	52.2	11.04	2.12821	33	33.89	1.35922	32	36.57	0.795349	32	21.87
KV310_HUMAN	Ig kappa chain V-III region VH (Fragment)	12.7	5.6	108.1	3	23.3	151.34	2.23077	14	26.06	1.21359	14	23.92	0.669767	14	26.62
KV311_HUMAN	Ig kappa chain V-III region IARC/BL41	14.1	7.1	207.5	2	24.2	16.79	1.74359	48	32.89	1.04854	48	26.27	0.753488	48	19.89
KV313_HUMAN	Ig kappa chain V-III region HIC	14.1	7.1	547.2	7	56.6	12.89	1.94872	130	32.12	1.23301	133	35.12	0.753488	131	19.66
KV401_HUMAN	Ig kappa chain V-IV region (Fragment)	13.4	4.9	338.4	7	34.7	22.94	2.05128	49	36.37	1.40777	49	31.74	0.84186	49	25.43
KV402_HUMAN	Ig kappa chain V-IV region Len	12.6	9.0	503.7	8	42.1	14.85	1.79487	68	34.16	1.29126	67	27.63	0.897674	65	19.77
KV405_HUMAN	Ig kappa chain V-IV region STH (Fragment)	12.1	9.1	188.8	4	33.0	23.89	2.23077	16	38.62	1.34951	16	43.34	0.739535	16	20.69
LAC2_HUMAN	Ig lambda-2 chain C regions	11.3	7.7	1949.4	26	91.5	14.37	2.69231	700	61.6	2.05825	722	71.8	0.967442	706	33.17
LAC3_HUMAN	Ig lambda-3 chain C regions	11.2	7.7	1664.9	22	88.7	14.50	2.76923	679	57.69	2.12621	698	66.46	0.967442	683	32.78
LAC7_HUMAN	Ig lambda-7 chain C region	11.3	9.5	1195.7	15	67.9	14.98	2.25641	371	42.02	1.7767	376	48.24	0.972093	373	26.57
LACB2_HUMAN	Beta-lactamase-like protein 2	32.8	6.3	26.8	1	3.1	762.19	21.8205	3	8.81	3.2233	3	7.49	0.181395	3	7.99
LAIR1_HUMAN	Leukocyte-associated immunoglobulin-like receptor 1	31.4	5.3	361.5	6	15.7	12.17	0.205128	25	33.64	0.0873786	26	44.36	0.55814	26	32.8
LAMA4_HUMAN	Laminin subunit alpha-4	202.4	5.9	25.8	1	0.4	26.05	2.79487	4	14.57	1.64078	4	16.23	0.725581	4	4.23
LAMB1_HUMAN	Laminin subunit beta-1	197.9	4.7	138.5	3	1.3	484.56	0.871795	7	65.71	0.601942	7	17.79	0.846512	7	83.45
LAMB2_HUMAN	Laminin subunit beta-2	195.9	6.1	153.4	3	1.7	419.66	1.02564	8	72.95	0.621359	9	27.93	0.739535	8	63.19
LAMC1_HUMAN	Laminin subunit gamma-1	177.5	4.9	115.8	2	1.7	254.51	0.461538	5	32.75	0.291262	5	25.63	0.772093	5	23.51
LAMP1_HUMAN	Lysosome-associated membrane glycoprotein 1	44.9	9.9	108.4	2	5.8	27.55	0.487179	9	75.61	0.504854	10	40.61	1.26977	9	35.01
LAMP2_HUMAN	Lysosome-associated membrane glycoprotein 2	44.9	5.3	181	3	7.3	14.87	0.205128	12	36.23	0.213592	12	81.15	1.25116	12	39.36
LASP1_HUMAN	LIM and SH3 domain protein 1	29.7	6.7	72.2	2	8.4	7.58	0.820513	3	102.26	0.436893	3	45.05	0.64186	3	43.71
LATS1_HUMAN	Serine/threonine-protein kinase LATS1	126.8	9.4	55.1	2	1.3	940.29	20.7949	5	234.98	5.31068	5	98.37	0.311628	5	82.86
LAYN_HUMAN	Layilin	43.1	4.7	120.2	3	8.4	7.15	0.692308	8	18.34	0.436893	8	30.66	0.790698	8	18.44
LBP_HUMAN	Lipopolysaccharide-binding protein	53.3	6.2	383.8	5	14.8	14.12	4.51282	16	55.32	3.61165	16	41.75	0.986047	16	53.37
LCAT_HUMAN	Phosphatidylcholine-sterol acyltransferase	49.5	5.7	796.1	12	17.7	8.92	0.538462	54	51.25	0.339806	56	68.58	0.734884	53	52.59
LCN1_HUMAN	Lipocalin-1	19.2	5.3	113.8	2	12.5	11.30	1.10256	20	46.89	0.592233	20	36.44	0.655814	20	42.24
LDHA_HUMAN	L-lactate dehydrogenase A chain	36.7	9.3	759.3	12	43.1	15.57	0.564103	50	72.83	1.96117	55	37.76	3.70233	50	86.74
LDHB_HUMAN	L-lactate dehydrogenase B chain	36.6	5.7	822.6	14	47.3	19.51	0.538462	44	47.65	0.640777	45	41.29	1.3907	44	53.48
LEG1_HUMAN	Galectin-1	14.7	5.2	134.1	3	20.7	21.57	1.17949	9	12.09	2.19417	9	22.94	2.29767	9	25.76
LEG3_HUMAN	Galectin-3	26.1	9.1	564.9	11	33.6	17.46	0.512821	49	151.29	1.29126	54	57.24	2.87907	49	159.16
LEG4_HUMAN	Galectin-4	35.9	9.7	560.4	9	32.8	17.45	1.41026	30	157.58	2.69903	31	83.64	1.92093	28	89.1
LEG9_HUMAN	Galectin-9	39.5	10.2	338.1	5	20.6	9.21	0.538462	19	39.6	0.514563	19	41.63	1.1814	20	44.42
LFA3_HUMAN	Lymphocyte function-associated antigen 3	28.1	6.3	64.2	2	4.4	25.75	0.410256	6	31.94	0.242718	6	34.49	0.744186	6	10.56
LG3BP_HUMAN	Galectin-3-binding protein	65.3	5.0	1490.7	18	34.4	13.72	0.769231	208	69.36	0.864078	210	44.36	1.38605	214	43.06
LGUL_HUMAN	Lactoylglutathione lyase	20.8	5.0	43.5	1	4.9	29.16	1.07692	5	22.55	1.01942	5	8.09	1.17209	5	25.13
LIN37_HUMAN	Protein lin-37 homolog	28.4	9.7	28.5	1	4.1	798.61	3.25641	2	4.2	0.38835	2	4.78	0.144186	2	0.58
LIRA5_HUMAN	Leukocyte immunoglobulin-like receptor subfamily A member 5	32.7	6.6	199.4	3	17.4	9.67	1.20513	10	43.29	0.446602	11	20.35	0.460465	9	36.39
LKHA4_HUMAN	Leukotriene A-4 hydrolase	69.2	5.8	204.5	3	6.4	10.56	0.564103	5	80.93	0.650485	5	118.02	1.42791	5	24.43
LMAN1_HUMAN	Protein ERGIC-53	57.5	6.3	85.5	1	5.5	6.27	2.05128	2	73.65	1.28155	2	13.96	0.772093	2	94.25
LMAN2_HUMAN	Vesicular integral-membrane protein VIP36	40.2	6.5	2104.6	35	56.5	14.76	1.25641	209	36.69	0.76699	215	40.92	0.762791	208	25.61
LMNA_HUMAN	Prelamin-A/C	74.1	6.6	987.4	20	27.3	12.52	0.435897	40	99.05	0.92233	41	43.43	2.35814	41	89.39
LONF1_HUMAN	LON peptidase N-terminal domain and RING finger protein 1	86.7	7.2	56.9	1	0.8	11.20	0.358974	4	14.87	0.0679612	4	15.59	0.251163	4	8.08
LPHN1_HUMAN	Latrophilin-1	162.6	6.2	88.1	2	2.2	14.66	0.74359	3	29.86	0.456311	2	0.28	0.623256	2	9.65
LPPL_HUMAN	Eosinophil lysophospholipase	16.4	7.7	248.8	4	20.4	21.42	0.589744	15	79.98	1.80583	15	78.48	3.71628	15	172.89
LRC19_HUMAN	Leucine-rich repeat-containing protein 19	42.3	4.9	157	2	8.9	27.88	0.641026	9	45.44	0.495146	9	42.05	0.939535	9	34.75
LRC59_HUMAN	Leucine-rich repeat-containing protein 59	34.9	10.4	59	2	3.9	15.34	2.4359	8	64.89	3.26214	8	95.4	1.65116	8	36.43
LRIF1_HUMAN	Ligand-dependent nuclear receptor-interacting factor 1	84.5	10.2	61.7	2	1.8	28.56	2.84615	5	180.12	12.1068	4	459.11	8.10698	5	138.7
LRP1B_HUMAN	Low-density lipoprotein receptor-related protein 1B	515.2	5.0	52	2	0.3	10.76	2.12821	12	10.52	0.980583	12	13.2	0.562791	12	11.33
LRP2_HUMAN	Low-density lipoprotein receptor-related protein 2	521.6	4.8	3585.1	61	15.9	13.10	0.794872	283	59.9	0.563107	288	59.51	0.888372	282	31.22
LRP3_HUMAN	Low-density lipoprotein receptor-related protein 3	82.8	5.8	41.3	1	2.7	7.06	0.897436	3	18.75	0.883495	3	14.9	1.1907	3	6.57
LSAMP_HUMAN	Limbic system-associated membrane protein	37.4	6.7	71	2	6.2	10.74	0.615385	3	29.55	0.446602	3	70.57	0.869767	3	37.69
LTBP1_HUMAN	Latent-transforming growth factor beta-binding protein 1	186.7	5.6	74.5	2	2.4	384.35	4.84615	2	83.41	1.83495	2	69.66	0.465116	2	9.8
LTBP2_HUMAN	Latent-transforming growth factor beta-binding protein 2	194.9	4.9	102.5	1	1.0	2.17	3.48718	3	16.93	2.36893	3	12.88	0.832558	3	23.54
LUM_HUMAN	Lumican	38.4	6.2	1049.6	14	38.2	16.23	1.87179	130	36.49	1.33981	134	36.12	0.874419	130	27.18
LUZP1_HUMAN	Leucine zipper protein 1	120.2	9.4	28.2	1	1.2	57.96	7.02564	2	18.94	1.49515	2	10.25	0.260465	2	8.57
LV001_HUMAN	Ig lambda chain V region 4A	12.4	7.5	100.6	2	13.7	30.48	1.76923	5	87.69	1.8932	5	74.7	1.30698	5	15.03
LV103_HUMAN	Ig lambda chain V-I region NEW	11.4	9.1	71.5	2	18.9	19.47	2.51282	5	32.74	1.12621	5	49.04	0.548837	5	52.51
LV104_HUMAN	Ig lambda chain V-I region NIG-64	11.4	4.5	182.9	3	7.2	16.79	2.33333	22	39.21	1.86408	22	29.46	0.981395	22	19.49
LV105_HUMAN	Ig lambda chain V-I region NEWM	10.9	10.1	114.7	3	25.2	31.73	1.97436	7	44.84	1.91262	7	15.48	1.1907	7	33.35
LV106_HUMAN	Ig lambda chain V-I region WAH	11.7	6.9	122.6	2	16.5	20.55	2.53846	21	33.8	2.30097	22	41.11	1.15814	21	18.54
LV109_HUMAN	Ig lambda chain V-I region EPS	11.4	10.1	53.4	2	7.3	12.24	2.15385	5	36.18	1.61165	5	12.87	0.916279	5	24.34
LV202_HUMAN	Ig lambda chain V-II region NEI	11.6	9.4	95.3	3	14.4	10.17	3.84615	11	73.67	2.5534	11	42.07	0.813953	11	46
LV204_HUMAN	Ig lambda chain V-II region TRO	11.6	9.4	60.3	2	7.2	16.16	1.94872	10	48.04	1.65049	10	41.96	1.04651	10	15.61
LV205_HUMAN	Ig lambda chain V-II region BUR	11.5	8.9	57	1	10.1	33.18	1.5641	6	38.93	1.02913	6	29.08	0.813953	6	19.17
LV209_HUMAN	Ig lambda chain V-II region WIN	11.7	9.3	62.9	2	7.2	12.81	3.41026	12	18.26	2.19417	12	20.59	0.790698	12	12.67
LV301_HUMAN	Ig lambda chain V-III region SH	11.4	6.1	99.1	2	25.0	13.92	3.82051	27	32.61	3.04854	28	34.96	1.0186	28	17.04
LV302_HUMAN	Ig lambda chain V-III region LOI	11.9	4.8	394.1	6	37.8	18.53	2.61538	35	74.01	1.53398	34	36.92	0.67907	35	37.85
LV403_HUMAN	Ig lambda chain V-IV region Hil	11.5	6.9	146.2	2	28.0	13.95	4.05128	31	39.13	2.6699	31	38.05	0.832558	31	25.53
LV603_HUMAN	Ig lambda chain V-VI region SUT	12.2	4.8	27.2	1	6.3	18.01	1.46154	2	8.24	1.15534	2	9.63	0.967442	2	17.97
LV604_HUMAN	Ig lambda chain V-VI region WLT	12.0	4.5	214.6	1	18.0	12.61	1.82051	35	37.68	1.23301	35	36.66	0.832558	35	27.46
LY6H_HUMAN	Lymphocyte antigen 6H	14.7	7.9	80.4	1	12.1	7.35	0.871795	2	34.23	0.669903	2	8.07	0.930233	2	25.63
LYAG_HUMAN	Lysosomal alpha-glucosidase	105.3	5.6	2526.1	39	41.4	14.68	0.564103	284	60.47	0.300971	286	60.1	0.632558	284	51.15
LYAM1_HUMAN	L-selectin	42.2	6.2	46.6	1	2.2	17.07	0.461538	2	9.43	0.330097	2	3.94	0.893023	2	13.41
LYNX1_HUMAN	Ly-6/neurotoxin-like protein 1	14.0	6.3	120.9	1	9.9	16.07	0.641026	7	22.64	0.475728	7	10	0.916279	7	15.25
LYPA2_HUMAN	Acyl-protein thioesterase 2	24.7	6.9	77	2	14.7	623.58	1.35897	2	195.2	0.883495	2	31.27	0.790698	2	120.67
LYPD3_HUMAN	Ly6/PLAUR domain-containing protein 3	35.9	9.5	104.8	1	5.8	21.36	0.487179	2	13.8	0.378641	2	5.38	0.986047	2	8.37
LYSC_HUMAN	Lysozyme C	16.5	10.6	515.4	9	50.7	15.70	0.538462	74	94.39	1.05825	77	49.52	2.42791	73	62.7
LYVE1_HUMAN	Lymphatic vessel endothelial hyaluronic acid receptor 1	35.2	9.5	432.9	7	14.3	21.81	1.02564	67	29.62	0.941748	68	17.59	1.14419	67	21.9
M3K5_HUMAN	Mitogen-activated protein kinase kinase kinase 5	154.4	5.4	81.7	1	0.7	58.13	3.05128	32	49.1	4.37864	31	46.77	1.67907	32	27.28
MA1A1_HUMAN	Mannosyl-oligosaccharide 1,2-alpha-mannosidase IA	72.9	6.0	385.9	5	10.3	21.04	0.666667	18	58.98	0.92233	18	25.54	1.84186	18	68.02
MA2B2_HUMAN	Epididymis-specific alpha-mannosidase	113.9	6.8	705.2	13	16.7	12.42	0.974359	34	80.26	0.601942	34	65.26	0.762791	34	38.39
MACF1_HUMAN	Microtubule-actin cross-linking factor 1, isoforms 1/2/3/5	837.8	5.2	277.8	5	0.5	219.77	0.769231	11	90.28	1.2233	11	292.65	1.93953	11	249.07
MADCA_HUMAN	Mucosal addressin cell adhesion molecule 1	40.1	4.9	117.5	2	6.3	4.81	0.512821	4	41.85	0.262136	4	29.85	0.637209	4	14.5
MAGD2_HUMAN	Melanoma-associated antigen D2	64.9	9.9	40.1	1	1.7	44.30	3.33333	5	28.23	3.60194	5	53.96	1.32093	5	32.17
MANBA_HUMAN	Beta-mannosidase	100.8	5.2	211.6	5	5.3	20.78	0.692308	11	46.83	0.495146	11	37.84	0.893023	11	28.59
MAP2_HUMAN	Microtubule-associated protein 2	199.4	4.7	85.4	2	0.9	516.96	0.461538	3	237.38	0.242718	3	191.66	0.646512	3	20.06
MAP9_HUMAN	Microtubule-associated protein 9	74.2	8.4	53.9	2	3.1	272.23	0.487179	3	199.61	0.514563	3	14.47	1.29302	3	164.8
MASP2_HUMAN	Mannan-binding lectin serine protease 2	75.7	5.3	854.5	12	12.8	11.83	0.794872	110	55.09	0.543689	110	57.99	0.865116	108	31.86
MATN4_HUMAN	Matrilin-4	68.4	5.7	238.3	2	4.8	12.49	0.666667	49	41.9	0.174757	54	95.09	0.311628	49	74.72
MBB1A_HUMAN	Myb-binding protein 1A	148.8	10.0	95.7	2	1.1	663.21	3.17949	2	68.62	3.28155	2	27.95	1.26977	2	35.77
MCF2_HUMAN	Proto-oncogene DBL	107.6	5.7	87.3	2	1.7	35.08	0.589744	3	127.48	0.339806	3	202.78	0.711628	3	44.62
MCP_HUMAN	Membrane cofactor protein	43.7	6.4	77	2	3.8	25.91	1.07692	2	7.81	1.06796	2	14.4	1.22326	2	6.53
MDHC_HUMAN	Malate dehydrogenase, cytoplasmic	36.4	7.7	61.9	2	8.1	14.60	0.846154	2	4.66	0.660194	2	12.1	0.95814	2	7.42
MDM1_HUMAN	Nuclear protein MDM1	80.7	9.7	29.1	1	1.5	36.58	0.846154	2	3.42	1.06796	2	4.31	1.56279	2	0.89
MDN1_HUMAN	Midasin	632.4	5.4	111.4	3	0.5	831.94	0.692308	3	265.05	0.359223	3	186.83	0.637209	3	22.12
MDR1_HUMAN	Multidrug resistance protein 1	141.4	9.6	85.1	3	2.0	857.73	0.589744	4	73.85	0.495146	4	41	1.05116	4	76.47
MED1_HUMAN	Mediator of RNA polymerase II transcription subunit 1	168.4	9.5	84.6	3	1.2	24.63	2.07692	7	65.88	2.86408	7	59.8	1.68837	7	47.93
MEGF8_HUMAN	Multiple epidermal growth factor-like domains protein 8	302.9	6.5	252.8	5	4.0	23.07	0.230769	7	88.26	0.339806	7	8.25	1.73953	7	98.24
MEP1A_HUMAN	Meprin A subunit alpha	84.4	5.3	913.9	15	20.9	9.88	1.84615	70	79.46	5.65049	74	198.31	4.05116	75	130.53
MEP1B_HUMAN	Meprin A subunit beta	79.5	5.4	258.5	5	9.6	7.52	2.30769	10	22.03	5.48544	10	59.89	2.93488	10	64.16
METRN_HUMAN	Meteorin	31.2	10.8	27.1	1	3.1	72.23	0.487179	2	10.99	0.281553	2	3.27	0.72093	2	7.7
MFAP4_HUMAN	Microfibril-associated glycoprotein 4	28.6	5.3	102.9	1	7.1	24.02	0.512821	2	8.99	0.660194	2	59.83	1.6093	2	48.95
MFAP5_HUMAN	Microfibrillar-associated protein 5	19.6	5.6	42.6	1	5.2	5.94	1.79487	3	25.72	0.893204	3	23.88	0.613953	3	22.63
MGA_HUMAN	Maltase-glucoamylase, intestinal	209.7	5.2	2560.3	43	25.5	12.37	0.923077	183	38.88	0.640777	182	30.2	0.897674	181	27.9
MIA3_HUMAN	Melanoma inhibitory activity protein 3	213.6	4.6	164.4	4	1.8	336.99	0.871795	10	124.3	0.980583	10	82.52	1.36279	10	50.58
MIEN1_HUMAN	Migration and invasion enhancer 1	12.4	4.2	79.1	2	15.7	11.04	0.846154	4	8.46	0.524272	4	4.71	0.767442	4	10.32
MIF_HUMAN	Macrophage migration inhibitory factor	12.5	9.1	66.7	2	17.4	8.21	0.564103	10	23.94	2.07767	10	92.6	4.62326	10	88.45
MIME_HUMAN	Mimecan	33.9	5.3	285.4	5	18.5	11.94	1.41026	18	42.48	0.786408	18	59.16	0.693023	18	59
MINP1_HUMAN	Multiple inositol polyphosphate phosphatase 1	55.0	8.9	35.8	1	2.3	1.56	0.307692	2	52.85	0.281553	2	22.54	1.16279	2	82.26
ML12B_HUMAN	Myosin regulatory light chain 12B	19.8	4.5	125.6	3	17.4	9.53	0.615385	9	27.51	1.17476	9	24.23	2.36744	9	8.13
MMP20_HUMAN	Matrix metalloproteinase-20	54.4	9.4	54.6	2	1.9	11.13	5.46154	16	17.13	1.20388	16	16.14	0.269767	16	10.33
MMP7_HUMAN	Matrilysin	29.7	8.8	85.6	2	7.5	8.55	0.333333	3	141.01	1.12621	4	20.15	3.68372	3	148.22
MMP8_HUMAN	Neutrophil collagenase	53.4	6.4	159.9	2	7.3	9.47	0.358974	11	39.37	1.41748	11	15.8	4.87442	11	42.31
MMP9_HUMAN	Matrix metalloproteinase-9	78.4	5.6	659.6	11	20.8	16.80	0.538462	33	122.54	1.13592	42	49.36	2.46047	33	109.42
MMRN2_HUMAN	Multimerin-2	104.3	5.5	561.3	6	10.1	23.63	0.512821	54	67.9	0.378641	54	58.81	0.883721	54	40.32
MNS1_HUMAN	Meiosis-specific nuclear structural protein 1	60.5	6.8	74	1	2.0	634.40	2.74359	2	5.67	3.78641	2	20.91	1.69302	2	26.81
MOES_HUMAN	Moesin	67.8	6.0	858.5	19	33.1	16.45	0.410256	62	61.08	0.68932	62	29.39	2.09302	62	59.68
MPRI_HUMAN	Cation-independent mannose-6-phosphate receptor	274.2	5.6	42.8	1	0.5	6.60	0.589744	3	15.84	0.300971	3	7.32	0.632558	3	22.58
MRC2_HUMAN	C-type mannose receptor 2	166.6	5.5	84.6	1	0.9	14.34	0.564103	7	27.06	0.466019	7	19.06	1.04186	7	34.42
MRO2B_HUMAN	Maestro heat-like repeat-containing protein family member 2B	180.7	5.9	26.3	1	0.5	9.48	1.07692	3	39.94	1.30097	3	32.28	1.48837	3	9.96
MRRP1_HUMAN	Mitochondrial ribonuclease P protein 1	47.3	10.0	60.8	2	1.7	34.92	1.66667	2	7.5	0.563107	2	5.53	0.413953	2	13.07
MSLN_HUMAN	Mesothelin	68.9	6.0	587.5	9	16.3	10.53	1.71795	25	36.53	1.29126	27	24.82	0.934884	25	25.11
MSMB_HUMAN	Beta-microseminoprotein	12.9	5.2	116.7	3	13.2	13.90	3.71795	10	54.83	1.33981	10	45.82	0.44186	10	15.91
MTPN_HUMAN	Myotrophin	12.9	5.2	95.6	2	18.6	20.71	1.23077	6	57.14	1.36893	6	74.5	1.36279	6	22.97
MUC1_HUMAN	Mucin-1	122.0	7.0	471.7	8	8.0	16.28	0.358974	37	37.22	0.213592	38	55.86	0.683721	38	49.44
MUC13_HUMAN	Mucin-13	54.5	4.8	149.1	2	7.0	203.04	0.589744	5	78.81	2.8932	5	30.27	5.91628	5	59.61
MUC16_HUMAN	Mucin-16	2353.1	5.6	64.7	2	0.1	405.35	1.48718	2	5.48	0.912621	2	1.11	0.748837	2	4.37
MUC18_HUMAN	Cell surface glycoprotein MUC18	71.6	5.5	607	10	15.6	24.24	0.692308	31	79.34	0.466019	32	36.35	0.846512	31	71.9
MUC2_HUMAN	Mucin-2	540.0	5.4	2620.2	41	9.1	12.07	1.12821	146	71.18	3.41748	159	86.3	3.53023	146	107.8
MUC5B_HUMAN	Mucin-5B	596.0	6.2	114.3	2	0.4	8.46	1	5	41.24	3.09709	5	204.91	3.8093	5	241.95
MUCB_HUMAN	Ig mu heavy chain disease protein	43.0	5.0	1067.6	17	46.5	19.82	1.30769	154	76.92	8.72816	180	150.34	6.53953	148	166.34
MVP_HUMAN	Major vault protein	99.3	5.2	138.4	2	3.6	6.26	1.97436	6	34.35	1.63107	6	22.14	1.01395	6	39.35
MXRA5_HUMAN	Matrix-remodeling-associated protein 5	312.0	9.3	32.6	1	0.5	10.39	2.66667	6	9.33	1.82524	6	9.45	0.837209	6	5.18
MXRA8_HUMAN	Matrix-remodeling-associated protein 8	49.1	6.8	448.4	8	17.2	20.02	0.717949	35	38.97	0.776699	36	31.61	1.29767	34	17.05
MYCD_HUMAN	Myocardin	101.9	6.2	29	1	1.3	18.99	3.25641	6	20.4	3.87379	6	31.82	1.46512	6	20.79
MYG_HUMAN	Myoglobin	17.2	7.9	565.8	7	50.6	8.87	2.5641	39	61.63	1.35922	44	90.59	0.739535	40	41.44
MYH11_HUMAN	Myosin-11	227.2	5.3	355.2	7	4.5	14.29	0.871795	22	154.81	1.5534	22	42.31	1.93023	21	97.52
MYH13_HUMAN	Myosin-13	223.5	5.4	166.5	3	1.3	14.16	0.846154	6	47.4	0.466019	6	42.5	0.674419	6	37.99
MYH14_HUMAN	Myosin-14	227.7	5.4	321.4	6	3.3	13.70	0.794872	21	129.38	1.35922	21	36.42	2.10233	21	97.24
MYH7B_HUMAN	Myosin-7B	221.3	5.7	108.5	2	0.7	15.40	0.282051	18	36.73	0.184466	19	63.83	0.730233	19	52.44
MYH9_HUMAN	Myosin-9	226.4	5.4	1943.8	34	20.2	13.87	0.641026	82	68.45	1.32039	86	51.5	2.2	84	74.57
MYL3_HUMAN	Myosin light chain 3	21.9	4.9	136.4	2	11.8	9.51	0.564103	6	25.26	0.456311	6	51.65	0.990698	6	49.64
MYL6_HUMAN	Myosin light polypeptide 6	16.9	4.4	311.7	5	33.1	15.06	0.923077	15	59.76	1.54369	15	47.35	2.05581	15	61.21
MYLK_HUMAN	Myosin light chain kinase, smooth muscle	210.6	5.8	90	1	0.6	10.39	0.435897	4	11.37	0.320388	4	7.54	0.883721	4	7.36
MYO1C_HUMAN	Unconventional myosin-Ic	121.6	10.1	358.3	5	5.0	29.90	0.512821	12	44.75	0.466019	12	29.3	1.10698	12	30.32
MYO1D_HUMAN	Unconventional myosin-Id	116.1	10.0	85.4	2	1.7	17.30	0.564103	3	26.75	0.805825	3	55.6	1.74419	3	31.57
MYO5A_HUMAN	Unconventional myosin-Va	215.3	9.4	120.5	3	1.2	23.44	21.1026	14	413.29	6.17476	14	163.61	0.35814	14	68.14
MYO7B_HUMAN	Unconventional myosin-VIIb	241.4	9.5	55.5	2	0.6	577.39	9.4359	4	75.71	4.36893	4	106.61	0.567442	4	25.23
MYOC_HUMAN	Myocilin	56.9	5.3	380.2	7	13.7	18.14	1.79487	17	56.6	1.52427	17	41.34	1.03721	18	30.56
MYOF_HUMAN	Myoferlin	234.6	5.8	53.5	1	0.4	875.96	13.8718	2	99.11	6.41748	2	110.98	0.567442	2	6.88
MYOME_HUMAN	Myomegalin	264.9	5.2	81.8	2	0.7	26.77	1.15385	3	97.72	0.640777	3	36.59	0.688372	3	49.19
NAA16_HUMAN	N-alpha-acetyltransferase 16, NatA auxiliary subunit	101.4	8.8	81.2	2	1.4	48.05	0.615385	3	89.77	0.436893	3	118.95	0.87907	3	17.31
NADC_HUMAN	Nicotinate-nucleotide pyrophosphorylase [carboxylating]	30.8	5.8	141.5	2	12.5	183.98	0.974359	4	59.44	1.00971	4	20.92	1.26512	4	41.05
NAGAB_HUMAN	Alpha-N-acetylgalactosaminidase	46.5	4.8	185.3	3	10.5	16.99	1.30769	13	87.09	0.631068	17	45	0.613953	13	63.17
NANP_HUMAN	N-acylneuraminate-9-phosphatase	27.8	6.0	60	1	5.2	689.65	2.4359	3	11.34	1.12621	3	3.95	0.567442	3	9.44
NAPSA_HUMAN	Napsin-A	45.4	6.2	393.8	7	19.3	23.46	0.717949	21	63.05	0.601942	21	55.3	1.04186	21	44.41
NAR3_HUMAN	Ecto-ADP-ribosyltransferase 3	43.9	5.7	606.4	9	26.7	20.23	2.92308	38	96.76	2.43689	38	76.75	1.03256	39	35.14
NB5R4_HUMAN	Cytochrome b5 reductase 4	59.4	8.5	62.1	2	1.5	11.21	0.25641	10	23.86	0.339806	10	25.05	1.56279	10	24.62
NBL1_HUMAN	Neuroblastoma suppressor of tumorigenicity 1	19.3	5.0	86	2	7.8	17.34	0.564103	11	37.88	0.631068	10	10.59	1.47907	11	25.2
NCAM1_HUMAN	Neural cell adhesion molecule 1	94.5	4.6	454.6	9	10.4	10.29	0.794872	17	61.78	0.38835	17	54.06	0.581395	16	31.58
NCOAT_HUMAN	Bifunctional protein NCOAT	102.8	4.7	25.7	1	1.0	37.59	2.25641	2	1.5	1.36893	2	2.23	0.748837	2	3.73
NEBU_HUMAN	Nebulin	772.4	9.5	190.3	4	0.5	27.67	1.02564	9	75.35	1.64078	9	87.09	1.94419	9	20.03
NEGR1_HUMAN	Neuronal growth regulator 1	38.7	5.8	596.9	11	33.3	13.74	0.871795	52	46.17	0.524272	53	47.25	0.72093	51	30.02
NEK3_HUMAN	Serine/threonine-protein kinase Nek3	57.7	6.8	63.8	2	3.0	55.20	0.820513	3	258.08	0.330097	3	180.94	0.493023	3	42.01
NEO1_HUMAN	Neogenin	159.9	6.1	175.2	4	2.9	9.94	0.717949	7	49.07	0.359223	7	42.96	0.604651	7	45.55
NEP_HUMAN	Neprilysin	85.5	5.4	1184.2	22	33.6	15.21	0.435897	86	48.93	0.427184	87	32.29	1.20465	87	31.93
NEUR1_HUMAN	Sialidase-1	45.4	5.5	79.6	2	5.1	5.35	1.48718	3	22.87	0.912621	3	7.39	0.753488	3	27.46
NEUS_HUMAN	Neuroserpin	46.4	4.7	243	5	16.6	7.07	0.74359	12	45.95	0.339806	12	59.33	0.562791	12	57.12
NFX1_HUMAN	Transcriptional repressor NF-X1	124.3	10.2	25.9	1	0.9	695.76	1.51282	2	2.2	0.961165	2	0.69	0.776744	2	1.51
NGAL_HUMAN	Neutrophil gelatinase-associated lipocalin	22.6	9.6	526.6	9	53.0	13.24	0.25641	39	89.03	0.320388	44	56.74	1.67442	39	75.34
NHEJ1_HUMAN	Non-homologous end-joining factor 1	33.3	5.6	26.9	1	1.7	33.00	2.51282	2	0.83	2.01942	2	3.31	0.990698	2	2.48
NHLC3_HUMAN	NHL repeat-containing protein 3	38.3	6.0	138.1	3	12.4	7.45	0.923077	6	31.47	0.776699	6	29.69	1.01395	6	40.37
NHRF1_HUMAN	Na(+)/H(+) exchange regulatory cofactor NHE-RF1	38.8	5.5	46.2	1	3.9	14.50	1.41026	2	7	1.01942	2	4.91	0.87907	2	2.08
NID1_HUMAN	Nidogen-1	136.3	5.0	1357.3	15	18.4	12.56	0.820513	132	49.2	0.456311	134	51.47	0.660465	131	42.74
NIT1_HUMAN	Nitrilase homolog 1	35.9	9.2	41.2	1	3.1	26.28	0.794872	3	29.34	1.67961	3	24.52	2.61395	3	44.68
NKAP_HUMAN	NF-kappa-B-activating protein	47.1	10.6	33.9	1	3.6	7.17	1.12821	3	9.4	0.252427	3	20.03	0.269767	3	24.43
NMDE1_HUMAN	Glutamate receptor ionotropic, NMDA 2A	165.2	6.7	54.8	2	1.2	544.73	2.51282	3	169.52	1.06796	3	71.01	0.52093	3	56.36
NOCT_HUMAN	Nocturnin	48.2	7.1	53	2	3.5	17.30	0.717949	2	4.97	0.427184	2	30.97	0.744186	2	25.71
NOD1_HUMAN	Nucleotide-binding oligomerization domain-containing protein 1	107.6	6.8	62.3	1	0.8	33.88	0.461538	2	6.48	0.330097	2	19.5	0.893023	2	26.23
NOMO3_HUMAN	Nodal modulator 3	134.0	5.3	43.1	1	0.8	35.54	0.384615	2	8.53	0.990291	2	0.84	3.09302	2	9.37
NOP56_HUMAN	Nucleolar protein 56	66.0	9.8	25.2	1	1.2	46.10	5.25641	2	13.81	40.5243	2	14.79	9.47907	2	0.97
NOV_HUMAN	Protein NOV homolog	39.1	9.8	135.4	3	11.2	12.27	3.97436	8	68.11	1.96117	8	111.61	0.604651	8	55.22
NP1L2_HUMAN	Nucleosome assembly protein 1-like 2	52.5	4.2	63.3	2	2.4	417.16	12.2564	2	21.31	3	2	26.58	0.302326	2	5.06
NPAS3_HUMAN	Neuronal PAS domain-containing protein 3	100.7	6.2	26.3	1	1.3	39.74	2.51282	3	8.35	1.33981	3	6.57	0.651163	3	7.81
NPC2_HUMAN	Epididymal secretory protein E1	16.6	9.0	230.4	4	32.5	15.90	0.435897	13	62.5	0.398058	13	66.35	1.15814	13	12.68
NPTN_HUMAN	Neuroplastin	44.4	9.0	47.5	1	2.3	8.85	0.333333	2	31.49	0.252427	2	2.85	0.92093	2	28.45
NQO1_HUMAN	NAD(P)H dehydrogenase [quinone] 1	30.8	9.4	33.4	1	3.6	13.17	6.07692	2	14.92	1.65049	2	52.23	0.334884	2	35.31
NQO2_HUMAN	Ribosyldihydronicotinamide dehydrogenase [quinone]	25.9	5.9	33.6	1	3.9	14.83	0.589744	2	12.32	0.563107	2	11.14	1.18605	2	1.17
NRP1_HUMAN	Neuropilin-1	103.1	5.5	45.3	1	1.7	40.62	1.28205	4	35.27	1.26214	4	21.14	1.19535	4	32.04
NSF1C_HUMAN	NSFL1 cofactor p47	40.5	4.9	63.6	1	3.2	7.73	0.641026	3	11.65	0.398058	3	6.13	0.781395	3	11.75
NTF2_HUMAN	Nuclear transport factor 2	14.5	5.0	579.8	9	74.8	15.55	0.589744	57	66.37	0.708738	60	53.77	1.4	56	60.95
NTRI_HUMAN	Neurotrimin	37.9	9.1	236.5	3	9.6	21.22	0.717949	17	41.75	0.349515	17	35.64	0.590698	17	46.45
NU188_HUMAN	Nucleoporin NUP188 homolog	195.9	6.3	69.8	2	0.8	56.76	0.153846	5	96.62	0.135922	5	346.81	1.10233	5	99.64
NUCB1_HUMAN	Nucleobindin-1	53.8	5.0	442.6	8	21.0	16.00	0.74359	21	72.57	0.533981	21	89.88	0.934884	20	31.35
NUCB2_HUMAN	Nucleobindin-2	50.2	4.9	111.4	2	4.5	6.49	1.76923	6	46.07	0.854369	6	29.59	0.595349	6	16.49
NUDC1_HUMAN	NudC domain-containing protein 1	66.7	4.9	40.4	1	1.7	700.01	2.30769	2	4.92	2.46602	2	6.56	1.31163	2	1.63
O4A15_HUMAN	Olfactory receptor 4A15	38.8	9.9	29.6	1	2.6	66.32	3.48718	2	8.6	1.12621	2	15.23	0.395349	2	6.56
OAS1_HUMAN	2'-5'-oligoadenylate synthase 1	46.0	9.4	35.5	1	1.5	1211.93	12.7692	2	47.85	3.96117	2	54.21	0.381395	2	5.35
OAT_HUMAN	Ornithine aminotransferase, mitochondrial	48.5	6.6	91	2	5.7	26.76	1.53846	3	70.88	3.37864	3	85.74	2.68372	3	13.72
ODO2_HUMAN	Dihydrolipoyllysine-residue succinyltransferase component of 2-oxoglutarate dehydrogenase complex, mitochondrial	48.7	9.9	85.5	2	4.0	9.05	0.179487	7	55.47	0.126214	7	73.48	0.851163	7	36.92
OLFM4_HUMAN	Olfactomedin-4	57.2	5.4	1385.1	23	39.8	13.18	0.974359	125	58.75	2.78641	125	35.78	3.20465	130	77.29
OLR1_HUMAN	Oxidized low-density lipoprotein receptor 1	30.9	7.8	191.3	4	21.2	11.79	0.897436	4	73.39	0.776699	5	36.34	0.95814	4	55.57
OMA1_HUMAN	Metalloendopeptidase OMA1, mitochondrial	60.1	10.2	111.8	3	4.4	36.44	6.76923	9	161.76	3.46602	9	57.74	0.632558	9	267.04
OPCM_HUMAN	Opioid-binding protein/cell adhesion molecule	38.0	6.6	386.3	5	20.0	21.92	0.615385	24	33.45	0.291262	25	34.43	0.581395	24	19.27
OPHN1_HUMAN	Oligophrenin-1	91.6	8.9	83.1	1	1.1	54.39	2.10256	2	53.22	1.13592	2	38.88	0.665116	2	12.46
OR1M1_HUMAN	Olfactory receptor 1M1	34.8	10.2	29.5	1	2.2	33.18	1.53846	2	17.71	0.621359	2	2.92	0.493023	2	14.73
OR2I1_HUMAN	Putative olfactory receptor 2I1	34.1	11.3	34.9	1	2.5	1191.35	1.92308	3	23.24	0.84466	3	32.26	0.539535	3	10.65
OSCAR_HUMAN	Osteoclast-associated immunoglobulin-like receptor	30.5	6.1	244.5	5	31.6	30.49	0.25641	28	74.53	0.135922	28	97.26	0.632558	28	47.7
OSTP_HUMAN	Osteopontin	35.4	4.2	906.7	13	37.6	9.70	0.384615	98	96.19	0.116505	84	136.51	0.288372	90	114.51
OX2G_HUMAN	OX-2 membrane glycoprotein	31.2	9.7	63.1	1	8.3	9.39	0.717949	3	32.56	0.417476	3	18.35	0.716279	3	30.26
P3IP1_HUMAN	Phosphoinositide-3-kinase-interacting protein 1	28.2	4.8	138.1	2	9.9	14.32	0.333333	16	219.42	0.106796	16	151.5	0.413953	16	37.32
P66B_HUMAN	Transcriptional repressor p66-beta	65.2	10.4	120.2	2	2.0	1139.35	0.538462	3	19.96	1.16505	3	29.9	2.64651	3	51.04
PA2GA_HUMAN	Phospholipase A2, membrane associated	16.1	10.7	125.3	2	18.1	10.29	1.66667	4	80.15	3.46602	4	17.82	2.55814	4	59.15
PABP3_HUMAN	Polyadenylate-binding protein 3	70.0	10.2	142.9	3	6.5	22.15	0.846154	7	39.73	1.17476	7	44.44	1.73488	7	43
PAG15_HUMAN	Group XV phospholipase A2	46.6	6.3	95.9	2	7.0	27.24	0.692308	2	13.05	0.805825	3	37.87	1.81395	2	23.32
PALMD_HUMAN	Palmdelphin	62.7	5.2	52.9	2	1.1	494.47	2.74359	3	65.89	1.95146	3	78.27	0.874419	3	19.91
PAPP2_HUMAN	Pappalysin-2	198.4	5.2	933.5	20	16.3	15.60	2.12821	44	47.24	1.36893	45	64.62	0.813953	43	30.75
PARK7_HUMAN	Protein DJ-1	19.9	6.4	400	8	50.8	18.66	1.10256	10	117.84	0.990291	11	84.68	1.12093	10	52.49
PARP4_HUMAN	Poly [ADP-ribose] polymerase 4	192.5	5.3	26.4	1	0.8	573.60	0.641026	2	36.62	0.669903	2	13.68	1.30698	2	22.12
PBLD_HUMAN	Phenazine biosynthesis-like domain-containing protein	31.8	6.1	62.6	1	10.8	12.53	0.769231	2	41.35	1.02913	2	8.39	1.66512	2	51.03
PCD16_HUMAN	Protocadherin-16	346.0	4.6	70.1	2	0.9	7.39	0.846154	4	39.19	0.475728	4	37.37	0.693023	4	13.66
PCDGK_HUMAN	Protocadherin gamma-C3	101.0	4.9	362.5	6	9.4	11.90	0.692308	19	70.3	0.38835	19	62.34	0.716279	19	29.72
PCDH1_HUMAN	Protocadherin-1	114.7	4.8	229.5	3	3.2	12.62	0.666667	9	17.45	0.291262	9	14.86	0.539535	9	14
PCF11_HUMAN	Pre-mRNA cleavage complex 2 protein Pcf11	172.9	9.3	26.6	1	0.5	13.48	1.51282	2	0.59	0.718447	2	2.48	0.586047	2	1.89
PCOC1_HUMAN	Procollagen C-endopeptidase enhancer 1	47.9	8.7	551.8	9	16.7	10.40	1.51282	27	38.26	1.06796	29	43.07	0.934884	26	28.31
PCP_HUMAN	Lysosomal Pro-X carboxypeptidase	55.8	6.9	656.6	12	34.1	11.97	0.641026	34	43.11	0.679612	36	32.56	1.20465	36	39.65
PCSK1_HUMAN	ProSAAS	27.4	6.2	111.8	2	9.6	10.71	1.05128	2	26.73	0.398058	2	109.12	0.460465	2	68.85
PDC6I_HUMAN	Programmed cell death 6-interacting protein	96.0	6.1	603.4	11	13.1	11.96	0.384615	31	48.82	0.339806	31	42.39	1.17674	30	31.71
PDCD6_HUMAN	Programmed cell death protein 6	21.9	5.0	230.1	2	12.6	17.11	0.282051	7	23.29	0.291262	7	30.77	1.26047	7	29.48
PDIA1_HUMAN	Protein disulfide-isomerase	57.1	4.6	1425.6	26	54.9	13.40	1	79	104.17	2.09709	79	65.01	2.78605	79	91.06
PDIA3_HUMAN	Protein disulfide-isomerase A3	56.7	5.9	322	6	12.5	9.81	0.615385	10	134.18	1.05825	10	28.19	2.14884	10	140.87
PDIA4_HUMAN	Protein disulfide-isomerase A4	72.9	4.8	147.3	3	4.8	9.14	1.05128	6	65.67	1.58252	6	36.3	1.83721	6	35.79
PDIA6_HUMAN	Protein disulfide-isomerase A6	48.1	4.8	109.9	2	5.7	9.91	0.692308	4	29.21	1.54369	4	23.09	2.71628	4	8.06
PDS5A_HUMAN	Sister chromatid cohesion protein PDS5 homolog A	150.7	9.0	55.2	1	0.5	37.90	0.512821	2	2.54	0.980583	2	6.4	2.37674	2	3.85
PDS5B_HUMAN	Sister chromatid cohesion protein PDS5 homolog B	164.6	9.4	88	2	0.8	17.21	6.35897	12	103.04	9.40777	12	140.89	1.97674	11	15.69
PDXL2_HUMAN	Podocalyxin-like protein 2	65.0	4.1	73.2	1	2.3	14.63	0.871795	2	18.5	0.38835	2	13.97	0.55814	2	4.44
PDZ1I_HUMAN	PDZK1-interacting protein 1	12.2	4.6	42.6	1	9.6	10.18	1.33333	2	7.29	0.718447	2	4.91	0.669767	2	12.23
PDZ1P_HUMAN	Putative PDZ domain-containing protein 1P	44.0	5.3	84.2	2	4.2	34.74	1.10256	7	33.73	0.961165	7	46.74	1.06977	7	22.55
PEBP1_HUMAN	Phosphatidylethanolamine-binding protein 1	21.0	7.8	1237.3	17	83.4	13.32	0.384615	126	61.93	0.368932	128	41.38	1.1814	128	48.16
PEBP4_HUMAN	Phosphatidylethanolamine-binding protein 4	25.7	6.1	491.3	6	40.5	11.82	1.28205	51	69.8	1.21359	53	49	1.16279	51	50.77
PECA1_HUMAN	Platelet endothelial cell adhesion molecule	82.5	6.6	70	2	2.6	10.91	0.564103	3	58.18	0.349515	3	47.19	0.781395	3	12.52
PEDF_HUMAN	Pigment epithelium-derived factor	46.3	6.0	1522.2	20	52.2	16.34	3.10256	111	72.16	1.51456	115	60.02	0.632558	112	33.04
PEF1_HUMAN	Peflin	30.4	6.1	132.8	3	14.8	13.57	0.487179	2	23.93	0.504854	2	33.14	1.28837	2	8.7
PEPA3_HUMAN	Pepsin A-3	41.9	4.1	536.2	11	8.8	14.38	1.64103	75	53.09	0.970874	72	33.05	0.651163	74	41.73
PEPD_HUMAN	Xaa-Pro dipeptidase	54.5	5.6	69.7	2	3.4	8.68	0.717949	6	19.71	1.35922	6	7.98	2.32558	6	23.67
PEPL_HUMAN	Periplakin	204.6	5.4	302.1	6	3.6	14.03	0.512821	8	75.29	0.320388	8	69.41	0.790698	8	24.71
PERE_HUMAN	Eosinophil peroxidase	81.0	11.5	103.6	3	3.8	29.22	0.564103	6	35.36	0.990291	6	9.93	2.12558	6	31.1
PERM_HUMAN	Myeloperoxidase	83.8	10.1	1462.3	26	42.0	11.57	0.487179	105	71.7	1.51456	120	36.5	3.48372	107	78.36
PFD3_HUMAN	Prefoldin subunit 3	22.6	7.5	53.5	2	10.2	48.00	2.51282	3	167.84	0.669903	3	155.39	0.325581	3	5.12
PGAM1_HUMAN	Phosphoglycerate mutase 1	28.8	6.8	549.1	10	44.1	12.65	0.846154	43	57.75	2.21359	46	36.15	3.42326	44	92.41
PGBM_HUMAN	Basement membrane-specific heparan sulfate proteoglycan core protein	468.5	6.1	3516.6	49	12.4	13.91	1.07692	475	68.06	0.737864	477	63.94	0.804651	470	35.37
PGCA_HUMAN	Aggrecan core protein	250.0	4.0	43.3	1	0.5	11.93	0.794872	2	3.59	0.485437	2	3.24	0.744186	2	0.35
PGCB_HUMAN	Brevican core protein	99.1	4.4	27.3	1	0.9	1201.62	4.15385	2	9.45	0.116505	2	30.85	0.0325581	2	41.18
PGFRA_HUMAN	Platelet-derived growth factor receptor alpha	122.6	4.9	48.6	1	1.1	36.58	0.487179	4	42.83	0.300971	4	10.68	0.786047	4	47.91
PGFRB_HUMAN	Platelet-derived growth factor receptor beta	123.9	4.7	236.7	4	4.5	12.09	0.769231	14	56.87	0.446602	14	61.55	0.702326	14	30.01
PGK1_HUMAN	Phosphoglycerate kinase 1	44.6	9.2	716.2	13	40.8	11.36	0.846154	49	83.73	1.35922	49	29.72	1.94884	49	74.89
PGM1_HUMAN	Phosphoglucomutase-1	61.4	6.3	91.5	1	4.4	6.05	2.23077	2	18.4	0.902913	2	4.36	0.497674	2	13.96
PGRP1_HUMAN	Peptidoglycan recognition protein 1	21.7	10.0	471.4	7	40.3	12.28	0.820513	42	75.8	1.63107	52	74.98	2.70233	42	69.94
PGRP2_HUMAN	N-acetylmuramoyl-L-alanine amidase	62.2	8.0	1626.8	20	53.6	8.91	1.05128	118	66.41	0.825243	128	63.6	0.990698	114	60.37
PGTB2_HUMAN	Geranylgeranyl transferase type-2 subunit beta	36.9	4.8	28.2	1	4.2	68.85	1.79487	2	2.79	5.14563	2	16.88	3.50698	2	14.04
PHS_HUMAN	Pterin-4-alpha-carbinolamine dehydratase	12.0	6.3	67	2	19.2	30.56	0.564103	4	16.48	1.39806	4	8.68	3.0186	4	15.29
PHS2_HUMAN	Pterin-4-alpha-carbinolamine dehydratase 2	14.4	9.8	71.6	1	5.4	21.40	0.538462	3	16.98	1.3301	3	2.49	3	3	17.65
PI16_HUMAN	Peptidase inhibitor 16	49.4	5.1	882.8	14	29.4	9.02	2.15385	68	71.37	1.12621	69	100.87	0.702326	68	37.12
PIGR_HUMAN	Polymeric immunoglobulin receptor	83.2	5.5	3094.4	42	42.8	12.57	0.74359	530	76.66	1.01942	574	63.76	1.65581	528	81.08
PIP_HUMAN	Prolactin-inducible protein	16.6	9.3	250.5	5	47.9	22.74	1.38462	31	19.14	0.320388	31	44.68	0.283721	31	42.92
PIPNA_HUMAN	Phosphatidylinositol transfer protein alpha isoform	31.8	6.1	28.4	1	3.3	23.22	0.871795	3	5.48	1.1068	3	21.45	1.54884	3	17.4
PKCB1_HUMAN	Protein kinase C-binding protein 1	131.6	6.9	57.5	2	1.3	919.04	2.05128	2	74.13	2.30097	2	277.39	1.36744	2	966.21
PLAK_HUMAN	Junction plakoglobin	81.7	5.7	113	1	2.4	4.98	0.641026	3	70.17	0.650485	3	87.31	1.24186	3	42.24
PLBL1_HUMAN	Phospholipase B-like 1	63.2	9.5	57.9	2	4.0	7.80	0.820513	2	57.05	0.941748	2	6.06	1.4	2	49.75
PLBL2_HUMAN	Putative phospholipase B-like 2	65.4	6.4	354.6	6	13.8	16.31	0.948718	26	39.45	0.68932	26	29.94	0.902326	26	34.85
PLD3_HUMAN	Phospholipase D3	54.7	6.0	124.4	3	10.2	9.01	0.512821	9	83.41	0.873786	9	41.25	2.08837	9	68.6
PLDX1_HUMAN	Plexin domain-containing protein 1	55.7	5.4	105.1	3	8.6	4.57	0.974359	6	133.9	0.543689	6	177.33	0.697674	6	39.31
PLEC_HUMAN	Plectin	531.5	5.7	238.6	6	1.3	17.30	0.871795	12	109.45	1.14563	12	42.49	1.59535	12	100.08
PLHD1_HUMAN	Pleckstrin homology domain-containing family D member 1	59.2	6.1	59.8	2	2.8	11.67	0.615385	3	19.61	0.514563	3	24.17	1.00465	3	12.27
PLIN4_HUMAN	Perilipin-4	134.3	9.7	67.4	2	0.8	61.04	1.58974	15	22.84	1.94175	15	19.87	1.49302	15	20.15
PLMN_HUMAN	Plasminogen	90.5	7.3	2407.8	42	50.7	12.16	3.89744	206	66.55	3.31068	208	75.09	1.01395	211	34.91
PLSI_HUMAN	Plastin-1	70.2	5.2	859.5	15	27.7	18.26	0.923077	39	144.29	2.05825	38	77.23	2.49767	37	66.7
PLSL_HUMAN	Plastin-2	70.2	5.2	2371.8	41	69.9	14.96	0.410256	156	62.37	0.747573	164	24.81	2.39535	156	56.71
PLST_HUMAN	Plastin-3	70.8	5.3	816.5	16	23.2	27.48	0.333333	45	76.04	0.524272	48	44.91	1.92558	45	70.72
PLVAP_HUMAN	Plasmalemma vesicle-associated protein	50.6	9.8	29.9	1	2.3	76.95	1.48718	2	21.23	0.592233	2	19.13	0.493023	2	2.04
PMGE_HUMAN	Bisphosphoglycerate mutase	30.0	6.1	115.9	2	10.0	919.79	4.33333	4	69.78	3.54369	4	14.22	1.00465	4	52.57
PNISR_HUMAN	Arginine/serine-rich protein PNISR	92.5	10.5	31	1	1.0	15.15	0.615385	8	37.19	0.61165	8	10.72	1.2	8	30.15
PNPH_HUMAN	Purine nucleoside phosphorylase	32.1	6.5	189.3	4	15.9	21.63	0.820513	13	48.26	1.45631	12	13.8	2.35349	13	41.08
PODXL_HUMAN	Podocalyxin	58.6	5.2	269.8	4	7.3	20.11	0.538462	11	35.83	0.281553	11	24.54	0.618605	11	22.96
PON1_HUMAN	Serum paraoxonase/arylesterase 1	39.7	5.0	607.8	10	40.8	17.30	3.23077	31	77.7	6.40777	31	109.65	2.52558	30	33.69
POSTN_HUMAN	Periostin	93.3	7.8	108.5	3	2.9	20.23	3.79487	6	279.97	1.8835	6	152.25	0.609302	6	44.44
PPAL_HUMAN	Lysosomal acid phosphatase	48.3	6.3	407.8	9	18.2	10.11	0.435897	38	59.35	0.291262	38	49.49	0.906977	36	32.9
PPAP_HUMAN	Prostatic acid phosphatase	44.5	5.8	954.5	13	40.4	14.40	0.538462	89	34.34	0.640777	90	20.48	1.43256	90	30.82
PPBI_HUMAN	Intestinal-type alkaline phosphatase	56.8	5.5	121	3	5.5	31.80	0.897436	9	24.97	1.68932	9	40.29	2.30233	9	50.76
PPGB_HUMAN	Lysosomal protective protein	54.4	6.2	695	12	26.0	15.14	1.38462	51	50.16	0.757282	50	45.23	0.72093	50	15.1
PPIA_HUMAN	Peptidyl-prolyl cis-trans isomerase A	18.0	9.0	677	11	68.5	15.58	0.769231	59	65.75	2	59	39.06	3.31628	58	54.5
PPIB_HUMAN	Peptidyl-prolyl cis-trans isomerase B	23.7	9.9	362.1	7	30.1	24.46	0.666667	20	62.26	1.09709	20	37.75	2.0093	20	61
PPIC_HUMAN	Peptidyl-prolyl cis-trans isomerase C	22.7	9.3	94.2	3	13.7	27.84	0.717949	6	90.31	1.23301	6	22.76	2.10698	6	83.54
PPR3A_HUMAN	Protein phosphatase 1 regulatory subunit 3A	125.7	4.8	55.1	2	2.5	597.14	6.10256	2	13.37	5.86408	2	7.43	1.1814	2	20.95
PRAP1_HUMAN	Proline-rich acidic protein 1	17.2	5.1	129.4	3	26.5	13.78	1.10256	13	79.27	0.893204	13	34.09	0.990698	13	73.23
PRDM1_HUMAN	PR domain zinc finger protein 1	91.7	9.5	58.4	2	1.2	14.77	23.8974	17	35.8	6.41748	17	33.63	0.330233	17	7.46
PRDX1_HUMAN	Peroxiredoxin-1	22.1	9.2	765.8	13	44.7	15.54	0.487179	87	54.98	1.03883	87	51.87	2.55814	87	67.66
PRDX2_HUMAN	Peroxiredoxin-2	21.9	5.6	742.4	13	50.5	14.75	0.666667	97	66.44	2.50485	97	42.94	4.4093	98	73.88
PRDX3_HUMAN	Thioredoxin-dependent peroxide reductase, mitochondrial	27.7	8.9	105.7	3	19.5	11.16	1.76923	4	80.81	2.00971	4	15.47	1.3907	4	99.88
PRDX5_HUMAN	Peroxiredoxin-5, mitochondrial	22.1	9.9	86.2	2	10.3	12.38	0.871795	5	108.39	0.834951	5	20.08	1.18605	5	80.63
PRDX6_HUMAN	Peroxiredoxin-6	25.0	6.0	221.1	5	23.7	22.15	0.846154	18	64.69	1.04854	20	44.66	1.6186	18	47.46
PRG2_HUMAN	Bone marrow proteoglycan	25.2	6.4	92.6	2	12.2	3.72	1.30769	7	105.7	1.00971	7	60.45	0.953488	7	43.03
PRI2_HUMAN	DNA primase large subunit	58.8	8.8	55.8	2	4.3	450.89	2.46154	2	58.67	4.75728	2	605.38	2.3814	2	231.79
PRIO_HUMAN	Major prion protein	27.6	9.7	63.8	1	4.7	15.90	0.538462	4	52.77	0.31068	4	30.2	0.702326	4	21.26
PRL_HUMAN	Prolactin	25.9	6.6	333.6	6	33.0	9.64	1.51282	19	236.57	0.757282	19	98.3	0.6	18	89.83
PRND_HUMAN	Prion-like protein doppel	20.3	10.2	68.8	1	6.8	16.06	0.512821	4	11.93	0.330097	4	2.91	0.781395	4	9.57
PROC_HUMAN	Vitamin K-dependent protein C	52.0	5.8	135.7	2	4.3	19.62	1.12821	6	55.21	1.93204	7	53.05	2.06977	6	39.16
PROF1_HUMAN	Profilin-1	15.0	9.4	832.6	11	69.3	15.18	1.23077	155	45.81	3.03883	155	52.62	3.08372	156	55.26
PROF2_HUMAN	Profilin-2	15.0	7.5	59.1	2	5.7	25.34	1.15385	5	28.35	3.49515	5	38.43	3.73953	5	59.82
PROM1_HUMAN	Prominin-1	97.1	7.2	516.8	7	12.5	14.77	0.538462	30	70.92	0.330097	32	50.73	0.916279	30	48.83
PROS_HUMAN	Vitamin K-dependent protein S	75.1	5.4	381.5	8	12.3	10.94	2	15	44.47	2.18447	16	59.38	1.48837	16	41.16
PROZ_HUMAN	Vitamin K-dependent protein Z	44.7	5.6	746.3	13	28.2	18.61	0.717949	75	73.8	0.533981	75	79.67	0.916279	74	31.62
PRS23_HUMAN	Serine protease 23	43.0	10.1	83.6	1	2.9	9.44	1.74359	4	17.57	0.38835	4	8.85	0.274419	4	10.82
PRSS8_HUMAN	Prostasin	36.4	5.5	291.3	4	11.7	9.85	0.358974	16	46.59	0.252427	18	35.58	0.930233	14	29.59
PRTN3_HUMAN	Myeloblastin	27.8	10.3	192.8	3	17.6	14.49	0.384615	30	100.48	2.00971	30	33.26	6.23721	30	112
PRUN2_HUMAN	Protein prune homolog 2	340.4	4.2	60.4	2	0.5	9.14	0.435897	6	50.87	0.126214	6	112.32	0.362791	6	46.5
PSA1_HUMAN	Proteasome subunit alpha type-1	29.5	6.2	43.6	1	3.0	879.93	1.61538	2	18.25	1.28155	2	0.96	0.967442	2	17.27
PSA2_HUMAN	Proteasome subunit alpha type-2	25.9	7.7	212.8	3	23.1	14.11	0.897436	7	74.5	1.25243	8	81.08	1.91628	9	32.18
PSA3_HUMAN	Proteasome subunit alpha type-3	28.4	5.1	83.4	2	8.6	29.67	0.769231	4	45.02	1.01942	4	28.63	1.62791	4	76.23
PSA5_HUMAN	Proteasome subunit alpha type-5	26.4	4.6	201.9	3	18.7	211.97	0.820513	6	39.52	1.12621	6	37.3	1.67907	6	74.53
PSA6_HUMAN	Proteasome subunit alpha type-6	27.4	6.4	131.8	2	9.3	6.39	0.512821	7	37.82	0.961165	9	34.89	2.08372	7	65.21
PSA7_HUMAN	Proteasome subunit alpha type-7	27.9	9.3	53	1	2.8	12.03	1.30769	2	8.84	1.39806	2	1.21	1.32558	2	7.63
PSB2_HUMAN	Proteasome subunit beta type-2	22.8	6.6	52.9	1	5.5	16.62	0.153846	3	27.47	1.16505	7	16.49	8.29767	3	24.74
PSB6_HUMAN	Proteasome subunit beta type-6	25.3	4.7	29.3	1	4.6	14.08	0.410256	2	5.75	0.417476	2	4.26	1.26047	2	1.49
PSCA_HUMAN	Prostate stem cell antigen	12.9	4.9	78.5	1	8.1	32.55	1.38462	7	7.86	0.252427	7	24.85	0.227907	7	23.72
PSME1_HUMAN	Proteasome activator complex subunit 1	28.7	5.7	156.7	3	13.3	12.93	1.4359	7	73.1	2.70874	7	19.73	2.33488	7	88.1
PSME2_HUMAN	Proteasome activator complex subunit 2	27.4	5.4	85.1	2	10.5	9.19	0.717949	3	14.12	1.34951	3	46.31	2.27442	3	30.83
PTBP1_HUMAN	Polypyrimidine tract-binding protein 1	57.2	9.8	61	1	3.8	13.90	2.69231	2	13.88	2.09709	2	11.99	0.953488	2	1.87
PTGDS_HUMAN	Prostaglandin-H2 D-isomerase	21.0	8.9	1223.7	20	47.4	26.10	0.435897	85	98.84	0.281553	99	90.77	0.84186	83	43.03
PTGR1_HUMAN	Prostaglandin reductase 1	35.8	9.2	435	7	26.7	12.35	0.769231	20	56.28	0.747573	20	26.25	1.1814	20	36.57
PTGR2_HUMAN	Prostaglandin reductase 2	38.5	5.1	31.8	1	1.7	1028.78	5.15385	2	27.11	1.68932	2	25.03	0.404651	2	1.99
PTK7_HUMAN	Inactive tyrosine-protein kinase 7	118.3	6.7	47.6	1	1.6	20.65	0.717949	2	30.47	0.553398	2	3.06	0.953488	2	27.22
PTPRA_HUMAN	Receptor-type tyrosine-protein phosphatase alpha	90.5	6.3	51.1	2	1.5	29.42	1.23077	2	211.82	0.728155	2	105.71	0.725581	2	46.05
PTPRG_HUMAN	Receptor-type tyrosine-protein phosphatase gamma	161.9	6.0	644.4	11	10.9	12.58	1.12821	35	45.85	0.92233	35	29.42	1.01395	35	31.25
PTPRJ_HUMAN	Receptor-type tyrosine-protein phosphatase eta	145.9	5.3	64.3	1	1.0	37.29	0.717949	3	26.21	0.349515	3	15.51	0.6	3	19.61
PTPRK_HUMAN	Receptor-type tyrosine-protein phosphatase kappa	162.0	5.5	50.1	1	0.9	3.88	0.307692	4	47.82	0.708738	4	94.51	2.86047	4	47.15
PTPRN_HUMAN	Receptor-type tyrosine-protein phosphatase-like N	105.8	6.7	158.4	2	3.9	10.84	0.794872	6	33.51	0.747573	6	44.87	1.15814	6	29.1
PTPRS_HUMAN	Receptor-type tyrosine-protein phosphatase S	216.9	6.0	160.9	3	2.5	7.49	0.435897	12	62.8	0.262136	10	69.12	0.72093	10	27.47
PVR_HUMAN	Poliovirus receptor	45.3	6.1	269.3	5	13.9	11.92	0.487179	29	35.29	0.320388	29	36.32	0.804651	29	19.98
PVRL1_HUMAN	Poliovirus receptor-related protein 1	57.1	5.7	160.8	3	9.1	10.54	1	10	97.89	0.543689	10	106.68	0.665116	10	51.74
PVRL2_HUMAN	Poliovirus receptor-related protein 2	57.7	4.6	570.5	9	19.7	14.48	1	50	23.79	0.708738	49	14.1	0.87907	48	17.14
PVRL4_HUMAN	Poliovirus receptor-related protein 4	55.4	5.1	592.6	8	23.3	9.18	0.820513	35	45.49	0.407767	35	35.84	0.655814	34	29.15
PXDN_HUMAN	Peroxidasin homolog	165.2	6.8	101.6	1	1.3	12.27	0.589744	2	9.9	0.339806	2	14.19	0.711628	2	4.25
PYGB_HUMAN	Glycogen phosphorylase, brain form	96.6	6.4	58.5	2	1.7	784.19	2.30769	4	167.52	0.932039	3	74.14	0.511628	3	85.65
QOR_HUMAN	Quinone oxidoreductase	35.2	9.2	95.4	1	7.3	7.30	0.538462	2	7.77	0.592233	2	29.89	1.31628	2	21.75
QPCT_HUMAN	Glutaminyl-peptide cyclotransferase	40.9	6.1	904.4	13	42.4	18.64	0.461538	52	65.94	0.572816	55	33.77	1.48372	54	46.07
QSOX1_HUMAN	Sulfhydryl oxidase 1	82.5	9.9	324.8	7	11.4	12.09	1.07692	12	82.79	0.61165	12	71.59	0.693023	12	36.24
R4RL2_HUMAN	Reticulon-4 receptor-like 2	46.1	9.0	33.7	1	2.9	16.88	0.307692	5	61.68	1.02913	5	72.02	4.14419	5	105.67
RAB10_HUMAN	Ras-related protein Rab-10	22.5	9.4	191.1	4	22.5	10.58	0.461538	11	50.2	0.524272	11	27.97	1.37209	11	34.74
RAB14_HUMAN	Ras-related protein Rab-14	23.9	5.8	53.9	2	9.8	17.22	1.64103	2	31.57	0.854369	2	1.13	0.646512	2	32.79
RAB1B_HUMAN	Ras-related protein Rab-1B	22.2	5.4	140.3	3	14.4	11.55	0.538462	8	36.21	0.68932	8	22.16	1.61395	8	35.39
RABP2_HUMAN	Cellular retinoic acid-binding protein 2	15.7	5.2	51.5	1	6.5	13.76	0.461538	3	8.89	0.271845	3	2.42	0.739535	3	11.25
RADI_HUMAN	Radixin	68.5	6.0	610	16	26.6	17.77	0.410256	49	78.98	0.718447	49	26.46	2.24651	48	60.86
RAP1A_HUMAN	Ras-related protein Rap-1A	21.0	7.2	308.2	5	34.2	18.63	0.512821	17	31.09	0.524272	17	21.07	1.33953	16	20.23
RB11A_HUMAN	Ras-related protein Rab-11A	24.4	6.1	126.4	3	15.3	521.10	0.461538	8	27.33	0.815534	8	16.54	2.15349	8	38.57
RB15B_HUMAN	Putative RNA-binding protein 15B	97.1	10.3	37.7	1	1.8	19.98	2.71795	22	20.27	1.54369	22	25.01	0.697674	22	20.45
RBMS2_HUMAN	RNA-binding motif, single-stranded-interacting protein 2	43.9	9.7	60.9	2	2.9	20.75	2.94872	2	798.41	1.52427	2	623.11	0.632558	2	12.31
RD23A_HUMAN	UV excision repair protein RAD23 homolog A	39.6	4.4	133.8	3	12.9	23.84	0.923077	4	16.98	1.00971	4	35.76	1.32093	4	22.19
RD23B_HUMAN	UV excision repair protein RAD23 homolog B	43.1	4.6	260.6	5	13.9	21.05	0.794872	12	42.26	0.796117	13	36.78	1.15349	13	43.32
REG1A_HUMAN	Lithostathine-1-alpha	18.7	5.6	495.1	9	49.4	24.05	0.820513	63	58.97	0.912621	66	43.61	1.37209	63	51.95
REG3A_HUMAN	Regenerating islet-derived protein 3-alpha	19.4	9.0	748.2	10	45.1	27.96	1.17949	60	69.58	7.85437	81	191	6.42791	58	177.94
REG4_HUMAN	Regenerating islet-derived protein 4	18.2	10.2	254.4	4	39.9	145.36	1.41026	12	68.4	1.84466	11	34.87	1.38605	12	82.45
RET2_HUMAN	Retinol-binding protein 2	15.7	5.1	122.2	2	14.2	11.96	3.02564	9	34.55	6.83495	9	27.1	2.76744	9	34.7
RET4_HUMAN	Retinol-binding protein 4	23.0	5.7	3004.3	42	77.6	14.52	1.84615	1086	58.6	1.7767	1121	71.26	1.15349	1120	66.99
RETN_HUMAN	Resistin	11.4	7.7	301.2	5	59.3	12.82	0.564103	57	67.43	0.631068	58	43.95	1.27442	59	39.32
RFX6_HUMAN	DNA-binding protein RFX6	102.4	6.1	29.4	1	1.1	5.91	1.12821	4	9.6	3.35922	4	17.48	3.69302	4	25.28
RGSL_HUMAN	Regulator of G-protein signaling protein-like	125.6	9.8	81.1	2	1.1	622.46	1.4359	3	37.69	1.61165	3	89.63	1.38605	3	48.77
RHCG_HUMAN	Ammonium transporter Rh type C	53.1	5.9	115.3	2	6.7	11.95	0.615385	7	31.23	0.427184	7	44.13	0.851163	7	52.4
RHG07_HUMAN	Rho GTPase-activating protein 7	170.5	6.0	120.3	3	1.8	23.63	2.94872	16	312.67	4.62136	16	320.49	1.91628	16	18.17
RHG08_HUMAN	Rho GTPase-activating protein 8	53.5	9.9	66.2	1	2.6	16.88	16.9744	2	18.84	4.53398	2	19.62	0.330233	2	0.76
RHG12_HUMAN	Rho GTPase-activating protein 12	96.2	7.8	63.9	2	1.5	25.04	7.28205	8	19.23	3.15534	9	59.95	0.427907	9	24.36
RHOA_HUMAN	Transforming protein RhoA	21.8	5.8	139.8	4	19.2	26.96	0.769231	12	36.9	0.893204	12	49.44	1.43721	12	37.05
RIF1_HUMAN	Telomere-associated protein RIF1	274.3	5.3	119.3	2	0.6	13.18	1.89744	5	128.33	0.514563	5	72.68	0.334884	5	34.83
RINI_HUMAN	Ribonuclease inhibitor	49.9	4.6	96.4	2	5.6	10.74	0.74359	8	57.22	1.52427	8	34.29	2.51628	8	52.91
RISC_HUMAN	Retinoid-inducible serine carboxypeptidase	50.8	5.5	421.4	8	16.6	19.43	0.666667	18	46.89	0.281553	18	46.53	0.506977	18	36.24
RL40_HUMAN	Ubiquitin-60S ribosomal protein L40	14.7	10.7	535.4	9	50.8	15.60	0.153846	130	86.51	0.0970874	132	59.91	0.739535	131	52.24
RLA1_HUMAN	60S acidic ribosomal protein P1	11.5	4.0	77.9	1	14.0	19.44	1.07692	5	59.01	2.33981	5	62.04	2.69302	5	23.66
RLA2_HUMAN	60S acidic ribosomal protein P2	11.7	4.2	91.2	2	27.0	22.91	0.717949	3	37.78	1.29126	3	113.73	2.23256	3	129.81
RN166_HUMAN	RING finger protein 166	26.1	9.8	38.2	1	4.6	628.74	0.717949	2	9.6	0.553398	2	15.83	0.95814	2	6.15
RN168_HUMAN	E3 ubiquitin-protein ligase RNF168	65.0	9.3	33.4	1	2.6	22.93	0.871795	3	20.06	1.33981	3	18.43	1.57674	4	48.77
RN220_HUMAN	E3 ubiquitin-protein ligase RNF220	62.7	5.6	44	1	1.8	28.78	5.84615	3	14.76	0.271845	3	107.36	0.055814	3	90.91
RNAS1_HUMAN	Ribonuclease pancreatic	17.6	10.2	621.5	8	35.3	15.82	0.384615	31	81.17	0.524272	35	70.73	1.76744	31	47.06
RNAS2_HUMAN	Non-secretory ribonuclease	18.3	10.6	863.2	10	21.1	12.00	0.358974	149	124.59	0.31068	147	73.15	1.04651	145	63.2
RNT2_HUMAN	Ribonuclease T2	29.5	6.8	468.9	9	35.5	23.79	1.38462	23	42.12	1.76699	23	56.91	1.55349	24	37.64
ROBO4_HUMAN	Roundabout homolog 4	107.4	6.2	1183.7	18	19.3	12.68	0.538462	131	62.81	0.436893	133	50.28	1.0186	130	44.88
ROCK1_HUMAN	Rho-associated protein kinase 1	158.1	5.6	58.3	1	0.8	50.32	2.38462	3	18.31	1.18447	3	11.56	0.609302	3	9.49
ROR1_HUMAN	Tyrosine-protein kinase transmembrane receptor ROR1	104.2	6.8	191.6	3	4.6	11.12	0.717949	7	53.53	0.378641	7	22.42	0.665116	7	36.16
ROR2_HUMAN	Tyrosine-protein kinase transmembrane receptor ROR2	104.7	6.1	162.5	3	2.2	9.19	0.461538	13	34.09	0.31068	13	25.8	0.823256	13	40.86
RPAP3_HUMAN	RNA polymerase II-associated protein 3	75.7	6.5	58.8	2	1.8	814.54	8.23077	24	89.99	1.52427	25	50	0.237209	24	51.69
RRAGA_HUMAN	Ras-related GTP-binding protein A	36.5	8.8	123.4	4	6.1	17.84	18.2821	26	57.93	5.28155	26	43.75	0.348837	26	11.87
RRBP1_HUMAN	Ribosome-binding protein 1	152.4	9.3	130.2	1	1.3	9.23	0.974359	2	10.81	0.504854	4	67.55	1.01395	2	12.79
RRP5_HUMAN	Protein RRP5 homolog	208.6	9.6	131.1	3	1.1	856.35	2.30769	4	20.41	25.1262	4	14.27	13.3395	4	10.27
RSCA1_HUMAN	Regulatory solute carrier protein family 1 member 1	66.7	4.6	27.7	1	1.5	26.44	5.74359	3	27.83	1.41748	3	14.78	0.302326	3	13.26
RSH4A_HUMAN	Radial spoke head protein 4 homolog A	80.7	4.2	32.8	1	1.1	588.76	2.02564	2	24.85	1.72816	2	32.35	1.04651	2	7.08
RSSA_HUMAN	40S ribosomal protein SA	32.8	4.6	66.6	1	5.1	2.53	0.333333	2	68.17	1.64078	4	28.92	5.73488	2	46.35
RUN3B_HUMAN	RUN domain-containing protein 3B	52.8	5.3	78.3	2	2.3	19.56	0.435897	3	50.64	0.223301	3	34.14	0.627907	3	14.79
RYK_HUMAN	Tyrosine-protein kinase RYK	67.5	8.6	25.3	1	1.7	27.34	0.794872	2	43.76	2.12621	2	30.89	3.29767	2	82.5
RYR1_HUMAN	Ryanodine receptor 1	564.8	5.1	104.9	2	0.4	271.40	20	5	77.01	5.30097	5	132.05	0.325581	5	33.42
S100P_HUMAN	Protein S100-P	10.4	4.6	197	3	29.5	14.47	0.435897	39	41.44	1.28155	40	11.81	3.50233	39	48.22
S10A2_HUMAN	Protein S100-A2	11.1	4.5	155.4	3	17.3	12.76	0.564103	15	61.39	2.25243	14	22.11	4.57674	15	75.87
S10A4_HUMAN	Protein S100-A4	11.7	5.8	196.3	4	35.6	12.58	0.538462	21	48.4	1.68932	20	25.2	3.77674	21	34.11
S10A6_HUMAN	Protein S100-A6	10.2	5.2	456.5	7	55.6	11.78	0.435897	56	44.73	0.912621	62	18.99	2.55349	57	47.37
S10A7_HUMAN	Protein S100-A7	11.5	6.4	351.1	7	57.4	16.43	0.230769	18	49.06	0.165049	18	71.29	0.790698	17	37.62
S10A8_HUMAN	Protein S100-A8	10.8	6.6	980.5	18	81.7	14.16	0.358974	135	64.34	0.533981	139	47.21	1.7907	135	51.34
S10A9_HUMAN	Protein S100-A9	13.2	5.7	1850	27	85.1	12.83	0.282051	229	69.77	0.38835	228	29.34	1.54884	229	59.03
S10AA_HUMAN	Protein S100-A10	11.2	7.7	71.7	2	22.7	15.71	0.435897	8	25.54	1.16505	8	29.58	3.33023	8	52.08
S10AB_HUMAN	Protein S100-A11	11.7	7.5	298.8	4	41.0	13.18	0.205128	66	63.16	0.378641	66	37.35	2.13953	66	67.48
S10AC_HUMAN	Protein S100-A12	10.6	5.8	225.7	5	35.9	30.07	0.435897	29	58.96	1.17476	29	27.42	3.4	29	59.34
S10AD_HUMAN	Protein S100-A13	11.5	5.9	70.9	1	8.2	7.38	0.25641	3	12.5	0.271845	3	0.79	1.25116	3	12.88
S10AE_HUMAN	Protein S100-A14	11.7	5.0	89	2	25.0	15.47	0.641026	3	15.46	0.359223	3	9.18	0.688372	3	7.15
S10AG_HUMAN	Protein S100-A16	11.8	6.4	118.8	2	30.1	14.35	0.948718	5	94.09	0.728155	5	45.73	0.95814	5	43.03
S12A1_HUMAN	Solute carrier family 12 member 1	121.4	7.8	388.4	8	8.6	10.12	0.461538	34	86.67	0.349515	37	78.43	0.95814	34	79.69
S12A3_HUMAN	Solute carrier family 12 member 3	113.1	9.0	419.1	8	8.4	11.30	0.282051	24	76.93	0.194175	26	85.47	0.981395	25	69.87
S23IP_HUMAN	SEC23-interacting protein	111.0	5.2	27.6	1	1.1	2.03	1.12821	4	53.09	11.1165	4	31.04	12.0419	4	36.23
S26A4_HUMAN	Pendrin	85.7	6.0	120.6	2	3.8	9.40	0.179487	5	147.42	0.145631	5	62.16	0.95814	5	72.87
S36A2_HUMAN	Proton-coupled amino acid transporter 2	53.2	9.3	233	3	7.5	36.10	0.307692	15	75.16	0.339806	15	36.76	1.48372	15	74.83
S38A5_HUMAN	Sodium-coupled neutral amino acid transporter 5	51.4	9.5	25.4	1	2.1	18.57	8.74359	2	1.99	5.34951	2	20.68	0.753488	2	18.64
S38AA_HUMAN	Putative sodium-coupled neutral amino acid transporter 10	119.7	5.4	218.9	3	3.9	10.62	0.487179	6	86.17	0.203883	6	81.77	0.497674	6	44.72
SAA1_HUMAN	Serum amyloid A-1 protein	13.5	6.4	64.3	1	16.4	17.02	1.4359	3	12.34	1.43689	3	7.26	1.22791	3	7.88
SACS_HUMAN	Sacsin	520.8	6.7	57.7	2	0.4	19.30	2.97436	2	22.48	9.69903	2	181.04	4.01395	2	258.36
SAHH_HUMAN	Adenosylhomocysteinase	47.7	5.9	139.3	3	8.6	21.14	0.820513	6	66.51	0.776699	6	25.94	1.15814	6	48.99
SAMP_HUMAN	Serum amyloid P-component	25.4	6.1	301.6	5	23.3	18.80	1.97436	26	27.13	3.5534	26	32.97	2.15814	25	18.43
SAP_HUMAN	Proactivator polypeptide	58.1	4.9	1653.3	22	16.0	11.18	0.435897	153	107.52	0.320388	158	129.66	0.995349	152	47.51
SAP3_HUMAN	Ganglioside GM2 activator	20.8	5.0	579.5	10	50.8	17.77	1.4359	115	50.82	0.834951	113	45.49	0.753488	116	23.77
SBP1_HUMAN	Selenium-binding protein 1	52.4	5.9	710.3	12	30.1	11.48	0.820513	45	56.84	1.03883	46	50.4	1.53023	44	28.26
SBSN_HUMAN	Suprabasin	60.5	6.5	72.2	1	3.1	7.82	0.153846	8	70.83	0.0679612	8	68.61	0.562791	8	52.44
SC5A1_HUMAN	Sodium/glucose cotransporter 1	73.4	8.8	148.2	3	3.2	13.17	0.897436	3	13.78	3.81553	3	50.59	5.27907	3	58.56
SCAFB_HUMAN	Protein SCAF11	164.6	9.5	61.3	2	0.8	17.93	0.666667	5	44.92	3.20388	5	55.04	5.94419	5	115.19
SCG1_HUMAN	Secretogranin-1	78.2	4.9	29.7	1	1.8	399.37	0.333333	2	6.74	0.116505	2	8.22	0.404651	2	15.03
SCRB2_HUMAN	Lysosome membrane protein 2	54.3	4.9	98.8	1	4.0	4.00	0.538462	3	63.43	0.504854	5	37.75	1.30233	3	39.95
SCTM1_HUMAN	Secreted and transmembrane protein 1	27.0	7.9	1015.3	12	22.2	14.57	1.12821	243	43.23	0.728155	244	45.63	0.795349	241	41.04
SCUB2_HUMAN	Signal peptide, CUB and EGF-like domain-containing protein 2	109.9	6.2	158	3	4.0	30.68	1.61538	6	43.31	1.14563	6	49.37	0.874419	6	28.66
SDC4_HUMAN	Syndecan-4	21.6	4.2	100.2	2	12.1	7.78	0.435897	4	32.54	0.203883	4	33.59	0.567442	4	42.79
SDCB1_HUMAN	Syntenin-1	32.4	7.9	469	8	32.9	12.21	0.769231	42	69.12	0.582524	43	57.31	0.916279	40	59.37
SDE2_HUMAN	Protein SDE2 homolog	49.7	5.7	26.7	1	4.4	1.97	2.28205	2	9.93	1.87379	2	25.69	1.0093	2	15.47
SELM_HUMAN	Selenoprotein M	16.2	5.3	57.4	1	9.7	8.02	3.12821	2	29.69	2.31068	2	22.78	0.906977	2	6.58
SEMG1_HUMAN	Semenogelin-1	52.1	9.7	590.9	11	25.1	15.89	18.2564	37	143.22	0.621359	36	77.13	0.0465116	36	164.71
SEMG2_HUMAN	Semenogelin-2	65.4	9.6	514.2	9	15.1	12.71	18.2821	25	144.69	0.68932	25	58.76	0.0465116	25	208.22
SEPP1_HUMAN	Selenoprotein P	43.3	9.2	113.3	3	5.8	16.83	1.53846	8	38.48	1.69903	8	39.06	1.35349	8	24.18
SET_HUMAN	Protein SET	33.5	4.1	162.7	2	14.5	12.71	0.666667	5	49.82	1.08738	5	11.86	1.96744	5	39.15
SETMR_HUMAN	Histone-lysine N-methyltransferase SETMAR	76.6	6.7	30.3	1	0.9	4.46	1.38462	2	3.34	0.796117	2	3.34	0.711628	2	0.01
SF01_HUMAN	Splicing factor 1	68.3	9.7	28.9	1	1.1	66.38	2.33333	12	20.2	1.81553	12	22.35	0.995349	11	10.45
SF3A3_HUMAN	Splicing factor 3A subunit 3	58.8	5.1	31.8	1	2.2	42.58	3.92308	2	12.76	9.53398	2	11.21	2.98605	2	24.23
SFRP1_HUMAN	Secreted frizzled-related protein 1	35.4	10.1	110.9	2	9.2	36.74	1.84615	6	58.95	1.65049	6	48.74	1.09767	6	20.04
SGOL2_HUMAN	Shugoshin-like 2	144.6	8.9	86.9	2	1.1	463.48	1.35897	4	165.33	1.18447	4	190.7	1.07907	4	10.64
SH3L1_HUMAN	SH3 domain-binding glutamic acid-rich-like protein	12.8	5.1	355.8	6	51.8	17.55	1.87179	42	51.21	2.41748	44	72.38	1.64186	42	65.19
SH3L3_HUMAN	SH3 domain-binding glutamic acid-rich-like protein 3	10.4	4.7	648	14	75.3	14.15	1.74359	41	32.01	0.776699	42	37.86	0.55814	42	30.22
SHBG_HUMAN	Sex hormone-binding globulin	43.8	6.2	336.8	5	25.9	12.71	1.17949	15	81.92	1.96117	17	91.88	2.34419	15	71.16
SHE_HUMAN	SH2 domain-containing adapter protein E	53.9	9.8	27.9	1	1.2	3.57	1.53846	2	10.96	2.25243	2	0.62	1.8	2	11.59
SHOT1_HUMAN	Shootin-1	71.6	5.1	79.2	2	1.9	28.55	0.564103	2	69.97	3.23301	2	165.3	7.1907	2	55.28
SHPS1_HUMAN	Tyrosine-protein phosphatase non-receptor type substrate 1	54.9	6.6	779.3	13	27.8	12.66	0.769231	73	68.44	0.427184	71	46.01	0.748837	70	41.39
SHSA5_HUMAN	Protein shisa-5	25.6	6.4	76.2	2	3.3	14.11	0.410256	8	20.27	0.213592	8	14.26	0.655814	8	33.24
SIAE_HUMAN	Sialate O-acetylesterase	58.3	7.1	1047.3	13	39.4	11.36	0.615385	64	58.3	0.941748	76	42.69	1.93488	65	57.05
SIN1_HUMAN	Target of rapamycin complex 2 subunit MAPKAP1	59.1	7.9	30.6	1	1.7	15.31	2.33333	2	69.37	4.34951	2	92.8	2.29767	2	16.25
SIRB1_HUMAN	Signal-regulatory protein beta-1	43.2	6.1	664.5	13	31.9	12.38	0.666667	66	52.89	0.427184	68	39.22	0.734884	67	29.72
SKIL_HUMAN	Ski-like protein	76.9	6.8	32.5	1	1.2	4.08	4.12821	2	6.4	3.34951	2	8.55	0.995349	2	2.14
SLAF5_HUMAN	SLAM family member 5	38.8	6.7	278.2	4	17.1	22.13	0.589744	19	37.15	0.339806	18	19.58	0.744186	19	31.43
SLAI2_HUMAN	SLAIN motif-containing protein 2	62.5	10.0	55.3	2	2.1	859.40	4.97436	2	36.37	0.776699	2	85	0.190698	2	39.97
SLC31_HUMAN	Neutral and basic amino acid transport protein rBAT	78.8	5.6	147.8	3	5.3	35.88	0.846154	6	39.03	0.68932	6	48.49	0.995349	6	75.32
SLIK1_HUMAN	SLIT and NTRK-like protein 1	77.7	6.0	30.4	1	1.1	16.57	0.641026	2	5.48	0.427184	2	6.64	0.809302	2	1.16
SLIT2_HUMAN	Slit homolog 2 protein	169.8	6.9	25.8	1	1.2	19.48	1.64103	2	2.1	1.83495	2	6.08	1.3814	2	8.19
SLUR1_HUMAN	Secreted Ly-6/uPAR-related protein 1	11.2	5.1	434.5	6	68.0	13.00	1.82051	46	61.27	1	46	62.87	0.688372	48	23.39
SMC4_HUMAN	Structural maintenance of chromosomes protein 4	147.1	6.4	129.2	2	0.9	940.73	0.974359	2	84	1.01942	2	68.87	1.29767	2	10.8
SNX14_HUMAN	Sorting nexin-14	110.1	6.3	55.4	2	2.1	504.54	1.25641	3	126.81	0.854369	3	55.07	0.837209	3	52.78
SODC_HUMAN	Superoxide dismutase [Cu-Zn]	15.9	5.7	694.4	8	68.2	14.69	2.02564	67	39.14	1.98058	67	49.07	1.22326	66	24.95
SODE_HUMAN	Extracellular superoxide dismutase [Cu-Zn]	25.8	6.2	249	4	20.0	9.71	0.692308	34	75.51	0.398058	38	66.78	0.702326	34	81.07
SODM_HUMAN	Superoxide dismutase [Mn], mitochondrial	24.7	9.1	334.2	5	28.8	24.01	1	12	36.43	2.3301	14	42.12	3.08837	12	31.05
SORCN_HUMAN	Sorcin	21.7	5.2	39.3	1	5.1	22.06	0.974359	2	7.5	0.786408	2	0.54	0.976744	2	6.96
SORL_HUMAN	Sortilin-related receptor	248.3	5.2	98.8	2	1.7	28.52	0.820513	3	30.72	0.475728	3	38.22	0.725581	3	26.13
SPB10_HUMAN	Serpin B10	45.4	5.8	56.3	1	4.3	6.83	1.64103	2	37.76	2.13592	2	11.99	1.5907	2	51.45
SPB12_HUMAN	Serpin B12	46.2	5.3	355.5	6	20.2	12.61	0.307692	8	68.12	0.165049	8	131.06	0.660465	8	62.55
SPB13_HUMAN	Serpin B13	44.2	5.4	305.6	7	18.7	22.68	0.358974	20	167.08	0.184466	21	188.56	0.725581	21	59.39
SPB3_HUMAN	Serpin B3	44.5	6.4	1545.2	24	62.8	14.06	0.153846	123	72.93	0.126214	124	55.5	0.986047	124	53.43
SPB4_HUMAN	Serpin B4	44.8	5.8	977.5	19	40.8	12.62	0.153846	93	73.76	0.135922	93	56.27	1.00465	94	55.4
SPB5_HUMAN	Serpin B5	42.1	5.7	155.3	3	7.2	13.38	0.487179	7	92.59	1.2233	7	90.4	3.07442	7	41.51
SPB6_HUMAN	Serpin B6	42.6	5.0	273.3	5	18.6	26.64	0.846154	12	87.37	0.825243	14	67.01	1.10233	12	40.78
SPHM_HUMAN	N-sulphoglucosamine sulphohydrolase	56.7	6.5	225.6	5	13.3	18.95	0.666667	15	56.79	1.18447	15	31.23	2.1907	15	44.78
SPIT1_HUMAN	Kunitz-type protease inhibitor 1	58.4	5.9	247.1	6	11.9	10.23	0.641026	11	111.66	0.504854	11	121.7	0.95814	11	23.79
SPR1A_HUMAN	Cornifin-A	9.9	10.3	85.7	2	18.0	10.66	0.179487	9	25.43	0.106796	9	36.92	0.697674	9	26.38
SPRL1_HUMAN	SPARC-like protein 1	75.2	4.6	441.7	8	15.5	11.67	0.538462	21	51.37	0.553398	22	53.32	1.38605	22	87.27
SPRR3_HUMAN	Small proline-rich protein 3	18.1	9.9	506.4	10	52.1	14.33	0.179487	158	61.61	0.0873786	164	86.1	0.6	162	66.15
SPS2_HUMAN	Selenide, water dikinase 2	47.3	5.6	72.2	2	1.6	1097.57	2.97436	6	28.92	0.893204	6	42.26	0.367442	6	33.88
SPTA1_HUMAN	Spectrin alpha chain, erythrocytic 1	279.8	4.8	303.7	6	2.4	29.94	1.10256	9	91.03	2.54369	9	145.2	2.83256	9	125.9
SPTB1_HUMAN	Spectrin beta chain, erythrocytic	246.3	5.0	275.7	5	2.9	11.97	1.07692	9	21.72	1.78641	9	146.6	2.02791	9	143.01
SPTB2_HUMAN	Spectrin beta chain, non-erythrocytic 1	274.4	5.3	176.7	4	1.9	9.95	1.25641	9	116.99	1.20388	9	181.93	1.1907	9	62.25
SPTN1_HUMAN	Spectrin alpha chain, non-erythrocytic 1	284.4	5.1	527	9	5.3	6.41	1.05128	21	63.63	2.30097	22	52.53	2.75814	21	84.61
SPTN4_HUMAN	Spectrin beta chain, non-erythrocytic 4	288.8	5.7	85.1	2	0.8	18.76	1	2	54.57	1.02913	2	29.37	1.26977	2	94.4
SR140_HUMAN	U2 snRNP-associated SURP motif-containing protein	118.2	9.2	35.9	1	0.8	13.96	3.33333	6	12.35	2.68932	6	7.98	0.990698	6	10.05
SRC8_HUMAN	Src substrate cortactin	61.5	5.1	58.2	1	2.2	11.47	0.615385	15	18.77	0.466019	15	13.32	0.906977	15	18.66
ST14_HUMAN	Suppressor of tumorigenicity 14 protein	94.7	6.1	74.5	1	2.2	8.68	0.794872	2	17.59	0.747573	2	27.74	1.13953	2	9.8
STAB2_HUMAN	Stabilin-2	276.8	6.0	58.6	2	0.4	40.43	1.64103	3	44.51	1.48544	3	104.67	1.10698	3	45.65
STK40_HUMAN	Serine/threonine-protein kinase 40	49.0	9.0	45.1	1	2.3	743.57	8.17949	8	28.9	5.54369	8	20.74	0.832558	8	9.17
STOM_HUMAN	Erythrocyte band 7 integral membrane protein	31.7	8.9	196.9	3	16.7	14.67	0.769231	7	125.4	0.941748	10	14.64	1.5907	7	124.05
STX3_HUMAN	Syntaxin-3	33.1	5.2	59.1	2	4.2	739.97	0.410256	2	59.24	0.262136	2	2.18	0.795349	2	56.54
STXB2_HUMAN	Syntaxin-binding protein 2	66.4	6.1	81	1	2.5	11.27	1.25641	2	51.08	0.747573	2	5.62	0.725581	2	57.9
SUCB1_HUMAN	Succinyl-CoA ligase [ADP-forming] subunit beta, mitochondrial	50.3	7.7	64.5	1	1.7	21.15	3.05128	3	37.11	0.61165	3	45.42	0.246512	3	89.79
SUIS_HUMAN	Sucrase-isomaltase, intestinal	209.3	5.3	1488.4	27	20.0	10.11	1.46154	66	86.29	2.92233	70	102.68	2.8	67	111.17
SULF2_HUMAN	Extracellular sulfatase Sulf-2	100.4	10.0	64	1	1.5	4.99	0.410256	8	29.19	0.174757	8	22.85	0.525581	8	19.9
SUSD2_HUMAN	Sushi domain-containing protein 2	90.1	5.8	553.2	7	12.7	11.86	0.589744	17	69.6	0.650485	18	34.76	1.35814	17	47.65
SUSD5_HUMAN	Sushi domain-containing protein 5	68.0	4.6	217.6	3	6.7	18.07	1	6	39.5	0.61165	6	74.86	0.748837	6	49.83
SVEP1_HUMAN	Sushi, von Willebrand factor type A, EGF and pentraxin domain-containing protein 1	389.9	5.2	56.6	2	0.8	541.88	1.30769	5	49.42	0.621359	5	97.81	0.586047	5	36.93
SVIL_HUMAN	Supervillin	247.6	6.6	54.4	2	0.5	29.87	0.461538	3	79.04	1.01942	3	22.34	2.66047	3	114.3
SYG_HUMAN	Glycine--tRNA ligase	83.1	6.7	58.4	2	1.1	40.50	1.61538	2	18.07	2.25243	2	72.26	1.71628	2	99.14
SYHC_HUMAN	Histidine--tRNA ligase, cytoplasmic	57.4	5.6	116.2	1	1.8	29.27	2.87179	4	50.28	0.912621	4	82.1	0.386047	4	32.03
SYMPK_HUMAN	Symplekin	141.1	5.8	62.7	2	1.0	21.88	14.1282	41	61.93	2.54369	41	106.31	0.223256	41	38.74
SYNE1_HUMAN	Nesprin-1	1010.5	5.3	346	5	0.4	279.08	0.820513	10	93.23	0.76699	9	35.34	1.56279	10	83.53
SYNE2_HUMAN	Nesprin-2	795.9	5.1	151	3	0.3	12.03	2.10256	20	242.52	11.165	20	89.81	6.54419	20	307.49
SYRC_HUMAN	Arginine--tRNA ligase, cytoplasmic	75.3	6.3	126	2	2.6	477.91	0.769231	2	107.93	0.961165	2	8.78	1.51163	2	93.28
SZT2_HUMAN	Protein SZT2	377.8	5.8	40.6	1	0.3	22.90	0.282051	6	38.64	0.116505	6	44.24	0.516279	6	39.93
T106B_HUMAN	Transmembrane protein 106B	31.1	6.6	46.6	1	3.6	16.52	1.28205	2	3.2	0.650485	2	2.43	0.627907	2	5.64
T132E_HUMAN	Transmembrane protein 132E	107.0	5.5	30.4	1	0.9	21.01	0.538462	3	10.52	0.407767	3	10.07	0.939535	3	6.15
TAGL_HUMAN	Transgelin	22.6	9.4	277.8	6	31.8	18.55	1	11	60.96	1.32039	11	75.89	1.62326	11	45.84
TAGL2_HUMAN	Transgelin-2	22.4	9.3	394.6	5	28.1	10.55	0.410256	25	125.61	1.52427	26	25.85	4.57674	25	134.54
TALDO_HUMAN	Transaldolase	37.5	6.4	804.8	14	40.1	14.58	0.333333	37	71.11	0.737864	37	36.43	2.72558	37	67.09
TATD2_HUMAN	Putative deoxyribonuclease TATDN2	85.0	7.3	81.4	1	0.9	15.24	1.02564	2	6.93	0.495146	2	2.89	0.586047	2	9.83
TBA1B_HUMAN	Tubulin alpha-1B chain	50.1	4.8	489.2	9	21.7	9.65	0.641026	29	43.54	1.25243	35	45.23	2.65116	30	51.54
TBB4B_HUMAN	Tubulin beta-4B chain	49.8	4.6	421.4	7	24.3	20.20	0.538462	25	86.69	1.09709	28	37.54	2.29767	24	75.94
TBCA_HUMAN	Tubulin-specific chaperone A	12.8	5.1	36.7	1	8.3	11.99	0.512821	2	2.96	0.631068	2	1.05	1.50233	2	4
TCF7_HUMAN	Transcription factor 7	41.6	6.3	26.1	1	2.1	25.61	0.333333	2	37.36	0.349515	2	18.26	1.24651	2	18.19
TCHP_HUMAN	Trichoplein keratin filament-binding protein	61.0	6.2	114.6	2	2.2	12.78	5.61538	3	35.56	1.63107	4	193.56	0.725581	3	11.41
TCO1_HUMAN	Transcobalamin-1	48.2	4.8	105.7	2	6.2	20.93	1.07692	6	81.29	1.19417	7	70.01	1.15814	6	21.92
TCO2_HUMAN	Transcobalamin-2	47.5	6.6	151.2	2	8.4	7.62	0.641026	2	1.89	0.669903	3	46.62	0.939535	2	6.09
TCPB_HUMAN	T-complex protein 1 subunit beta	57.5	6.0	64.2	2	2.6	554.63	31.0256	3	112.51	8.31068	3	113.74	0.330233	3	0.71
TCPG_HUMAN	T-complex protein 1 subunit gamma	60.5	6.1	56	2	2.9	560.19	0.487179	5	40.02	6.06796	5	132.14	15.4512	5	200.85
TCPQ_HUMAN	T-complex protein 1 subunit theta	59.6	5.3	54.8	1	1.8	511.17	0.487179	2	1.79	0.640777	2	0.47	1.6186	2	2.25
TDR15_HUMAN	Tudor domain-containing protein 15	221.6	6.7	73.3	2	0.7	17.55	6.89744	20	115.31	2.25243	20	69.5	0.4	20	31.79
TEANC_HUMAN	Transcription elongation factor A N-terminal and central domain-containing protein	40.2	9.7	31.6	1	2.8	19.55	1.71795	2	2.02	2.08738	2	15.07	1.49767	2	17.13
TECTA_HUMAN	Alpha-tectorin	239.4	5.1	33.2	1	0.5	19.56	1.64103	3	8.97	1.09709	3	5.34	0.823256	3	3.97
TENA_HUMAN	Tenascin	240.7	4.6	431.2	8	5.6	12.69	1.12821	23	42.06	0.485437	25	26.79	0.581395	23	42.26
TENX_HUMAN	Tenascin-X	464.0	5.1	842.5	16	5.3	9.41	0.615385	39	59.52	0.38835	42	43.79	0.762791	39	41.75
TERA_HUMAN	Transitional endoplasmic reticulum ATPase	89.3	5.0	132.3	3	4.2	11.71	0.692308	7	100.47	0.84466	7	184.84	1.48837	7	105.59
TERT_HUMAN	Telomerase reverse transcriptase	126.9	11.8	26.5	1	0.5	61.28	4.05128	4	5.99	2.86408	4	3.72	0.869767	4	4.97
TETN_HUMAN	Tetranectin	22.5	5.4	748	12	60.9	15.26	0.564103	82	51.73	0.398058	82	49.08	0.893023	81	30.75
TEX9_HUMAN	Testis-expressed sequence 9 protein	44.8	6.2	59.9	2	5.6	12.73	1.07692	17	49.77	12.699	16	79.57	13.7953	16	36.93
TF3B_HUMAN	Transcription factor IIIB 90 kDa subunit	73.8	5.2	116	1	1.2	7.43	2.53846	2	12.9	4.81553	2	0.24	2.33953	2	13.15
TFF2_HUMAN	Trefoil factor 2	14.3	5.4	297.4	6	27.9	16.74	1	21	128.79	0.300971	21	146.46	0.372093	21	41.18
TFF3_HUMAN	Trefoil factor 3	8.6	5.6	41.7	1	13.8	2.94	1.41026	3	15.15	3.26214	3	9.87	2.84651	3	5.93
TGM1_HUMAN	Protein-glutamine gamma-glutamyltransferase K	89.7	5.6	52.5	1	1.6	10.53	0.128205	4	97.2	0.0679612	5	40.21	1.23256	5	163.08
TGM3_HUMAN	Protein-glutamine gamma-glutamyltransferase E	76.6	5.5	654.3	13	22.1	17.34	0.435897	34	139.51	0.223301	34	112.17	0.623256	32	71.71
THAP3_HUMAN	THAP domain-containing protein 3	27.0	11.3	31.4	1	2.5	1144.22	0.205128	2	14.55	0.135922	2	16.95	0.744186	2	2.35
THAP4_HUMAN	THAP domain-containing protein 4	62.9	10.2	52.3	2	2.9	30.81	2.20513	2	30.05	4.58252	2	83.11	2.56744	2	135.01
THBG_HUMAN	Thyroxine-binding globulin	46.3	5.9	1294.7	22	47.2	19.15	1.53846	131	26.28	1.04854	135	30.46	0.837209	135	29.86
THEG_HUMAN	Testicular haploid expressed gene protein	43.4	9.9	35.5	1	2.1	895.86	5.48718	9	15.09	2.78641	9	24.35	0.623256	9	21.41
THIO_HUMAN	Thioredoxin	11.7	4.7	260.2	5	31.4	18.33	0.25641	29	57.74	0.203883	28	42.47	1.04651	29	32.27
THOC5_HUMAN	THO complex subunit 5 homolog	78.5	6.4	55.8	1	1.6	622.17	7.15385	2	4.03	6.92233	2	6.74	1.1907	2	2.71
THRB_HUMAN	Prothrombin	70.0	5.6	2015.9	29	47.7	14.32	2.17949	208	129.12	1.43689	207	104.34	0.8	209	50.88
THY1_HUMAN	Thy-1 membrane glycoprotein	17.9	9.8	334.8	4	24.8	18.02	0.692308	51	52.89	0.533981	52	53.87	0.953488	50	32.7
TIF1B_HUMAN	Transcription intermediary factor 1-beta	88.5	5.4	31.7	1	1.3	25.89	29.5641	5	108.62	18.8155	5	99.1	0.781395	5	6.97
TIMP1_HUMAN	Metalloproteinase inhibitor 1	23.2	9.8	226.8	4	25.6	4.20	1.71795	8	60.74	1.84466	9	68.46	1.56279	7	28.6
TIMP2_HUMAN	Metalloproteinase inhibitor 2	24.4	8.8	116.8	2	9.1	7.98	1.76923	4	53.13	1.58252	4	63.31	1.09767	4	9.82
TITIN_HUMAN	Titin	3813.7	6.0	233.9	4	0.1	575.31	1.15385	15	54.52	1.42718	15	87.37	1.50698	15	138.66
TKT_HUMAN	Transketolase	67.8	8.5	860.3	16	27.8	14.22	1.69231	50	131.41	3.12621	51	111	2.26047	49	66.54
TLN1_HUMAN	Talin-1	269.6	5.7	460.7	7	3.7	8.62	2.82051	22	162.91	3.39806	26	178.04	1.87907	24	41.48
TM11D_HUMAN	Transmembrane protease serine 11D	46.2	9.6	57.1	2	4.3	29.41	0.538462	2	30.98	0.38835	2	4.52	0.906977	2	26.19
TM256_HUMAN	Transmembrane protein 256	11.7	9.9	273.6	3	29.2	11.73	0.435897	14	41.58	0.320388	14	30.27	0.92093	14	34.24
TM41B_HUMAN	Transmembrane protein 41B	32.5	10.1	29	1	2.7	856.84	2.66667	2	12.86	1.27184	2	18.61	0.586047	2	32.04
TMCC1_HUMAN	Transmembrane and coiled-coil domains protein 1	72.0	6.1	65.1	2	2.8	17.51	0.333333	9	81.95	0.291262	8	17.94	1.33023	9	20.2
TMED1_HUMAN	Transmembrane emp24 domain-containing protein 1	25.2	4.2	50.2	1	7.5	11.82	0.564103	2	53.02	0.262136	2	4.85	0.572093	2	47.29
TMED3_HUMAN	Transmembrane emp24 domain-containing protein 3	24.8	5.3	82	1	7.8	4.05	1.87179	2	89.55	1.28155	3	17.76	0.953488	2	84.89
TMED7_HUMAN	Transmembrane emp24 domain-containing protein 7	25.2	6.5	52.9	1	5.8	3.97	2.17949	4	36	1.61165	4	8.2	0.902326	4	31.04
TMED9_HUMAN	Transmembrane emp24 domain-containing protein 9	27.3	8.9	77.1	2	4.3	18.22	1.33333	8	46.09	1.16505	8	36.77	1.06047	8	45.87
TMM62_HUMAN	Transmembrane protein 62	73.1	9.9	61.3	2	1.7	15.34	2.05128	8	29.82	2.58252	8	35.43	1.53953	8	28.86
TMM81_HUMAN	Transmembrane protein 81	28.5	9.9	31.1	1	2.7	906.86	5.53846	6	63.11	5.39806	6	59.33	1.19535	6	50.72
TMPS5_HUMAN	Transmembrane protease serine 5	49.5	6.3	30.9	1	2.4	882.06	5.4359	5	25.36	1.33981	5	16.54	0.302326	5	17.5
TNI3K_HUMAN	Serine/threonine-protein kinase TNNI3K	92.8	6.3	62.6	2	1.9	30.03	0.897436	3	54.84	0.961165	3	25.72	1.31628	3	27.22
TNKS2_HUMAN	Tankyrase-2	126.8	6.8	28.4	1	0.9	9.58	2.48718	2	3.95	4.92233	2	0.88	2.44186	2	4.84
TNNT3_HUMAN	Troponin T, fast skeletal muscle	31.8	5.6	44.6	1	4.1	14.25	1	2	28.54	0.349515	2	65.67	0.427907	2	107.89
TNR16_HUMAN	Tumor necrosis factor receptor superfamily member 16	45.2	4.4	47.7	1	2.8	5.90	0.512821	2	15.32	0.300971	2	13.8	0.725581	2	1.5
TNR6_HUMAN	Tumor necrosis factor receptor superfamily member 6	37.7	9.6	89.7	2	4.8	23.56	3.5641	2	69.36	5.97087	2	38.86	2.05581	2	25.58
TOP2B_HUMAN	DNA topoisomerase 2-beta	183.2	8.8	85.9	2	0.7	20.40	29.3077	6	60.61	5.93204	6	53.35	0.246512	6	9.29
TPA_HUMAN	Tissue-type plasminogen activator	62.9	9.4	31.4	1	3.0	56.64	3.51282	2	10.47	5.8835	2	12.45	2.05581	2	1.96
TPIS_HUMAN	Triosephosphate isomerase	30.8	5.6	1240.3	17	73.8	17.55	0.717949	127	52.36	2.13592	126	38.95	3.69767	127	53.11
TPM1_HUMAN	Tropomyosin alpha-1 chain	32.7	4.5	402.1	7	20.8	21.94	0.846154	28	309.68	0.679612	28	124.05	0.972093	28	111.75
TPM2_HUMAN	Tropomyosin beta chain	32.8	4.5	409.9	9	23.9	19.90	0.794872	35	250.36	0.553398	35	99.06	0.855814	35	112.85
TPM3_HUMAN	Tropomyosin alpha-3 chain	32.8	4.5	420.3	8	19.7	16.18	0.282051	42	74.32	0.543689	41	50.1	2.24651	42	82.2
TPM3L_HUMAN	Putative tropomyosin alpha-3 chain-like protein	26.3	4.3	246.9	4	15.7	12.33	0.307692	16	89.92	0.660194	15	21.9	2.69302	16	65.57
TPM4_HUMAN	Tropomyosin alpha-4 chain	28.5	4.5	548.1	13	35.9	14.71	0.410256	39	99.47	0.398058	39	53.68	1.14419	40	91.98
TPP1_HUMAN	Tripeptidyl-peptidase 1	61.2	6.0	734.8	12	25.4	11.37	0.820513	46	35.95	0.631068	51	47.25	0.981395	49	47.49
TPP2_HUMAN	Tripeptidyl-peptidase 2	138.3	5.9	30	1	0.8	23.77	5.17949	2	9.33	2.14563	2	10.89	0.511628	2	1.55
TPRGL_HUMAN	Tumor protein p63-regulated gene 1-like protein	30.2	7.7	53.9	2	4.0	781.03	5.58974	2	53.73	9.74757	2	115.99	2.13953	2	43.89
TR19L_HUMAN	Tumor necrosis factor receptor superfamily member 19L	46.1	10.2	223	4	10.9	6.23	0.717949	20	146.34	0.495146	19	133.57	0.837209	19	57.53
TRBM_HUMAN	Thrombomodulin	60.3	4.6	418.9	5	11.7	8.11	0.564103	25	46.03	0.359223	27	68.79	0.702326	23	41.5
TREA_HUMAN	Trehalase	66.5	5.4	38.4	1	2.4	12.12	1.46154	3	34.85	0.747573	3	25.29	0.632558	3	63.43
TRFE_HUMAN	Serotransferrin	77.0	7.0	11201	165	80.1	14.22	12.7692	2459	128.96	3.61165	2458	105.83	0.339535	2509	29.23
TRFL_HUMAN	Lactotransferrin	78.1	9.6	1803.1	26	40.7	17.13	1.38462	144	224.19	2.35922	145	70.22	2.13023	144	134.8
TRFM_HUMAN	Melanotransferrin	80.2	5.5	517.8	10	21.0	13.31	3.02564	40	665.82	1.33981	40	286.92	0.52093	39	56.4
TRIM7_HUMAN	Tripartite motif-containing protein 7	56.6	9.1	56.2	1	1.6	7.88	1.94872	2	95.32	2.33981	2	24.15	1.46512	2	61.44
TRIPB_HUMAN	Thyroid receptor-interacting protein 11	227.4	5.1	205	3	1.1	396.32	1.12821	10	124.24	1.54369	10	93.48	1.66512	10	129.48
TRNK1_HUMAN	TPR and ankyrin repeat-containing protein 1	336.0	6.3	86.5	3	0.8	19.39	0.871795	6	205.51	1.17476	6	458.4	1.65581	6	162.8
TRPM3_HUMAN	Transient receptor potential cation channel subfamily M member 3	197.4	6.8	29.9	1	0.3	10.10	0.974359	4	39.27	1.00971	4	25.71	1.27907	4	17.31
TRY2_HUMAN	Trypsin-2	26.5	4.6	479.6	8	36.8	14.08	2.97436	46	74.26	7.25243	47	106.8	3.00465	46	81.15
TS101_HUMAN	Tumor susceptibility gene 101 protein	43.9	6.0	207	4	11.3	8.51	0.435897	8	43.03	0.262136	8	73.78	0.748837	8	49.33
TSC1_HUMAN	Hamartin	129.7	6.0	130.1	4	2.1	15.55	3.20513	5	69.4	5.08738	5	126.35	1.95349	5	109.78
TSN1_HUMAN	Tetraspanin-1	26.3	5.0	82.2	1	5.4	13.87	0.974359	4	21.22	0.718447	4	5.76	0.906977	4	15.51
TSN4_HUMAN	Tetraspanin-4	26.1	6.1	65.3	1	10.5	5.01	2	2	23.23	0.990291	2	38.47	0.604651	2	65.93
TSP4_HUMAN	Thrombospondin-4	105.8	4.3	290.3	4	7.1	8.66	1.20513	10	92.27	0.504854	10	61	0.511628	10	31.77
TTC18_HUMAN	Tetratricopeptide repeat protein 18	125.6	5.5	28.6	1	0.7	989.90	4.10256	2	8.39	1.37864	2	22.28	0.413953	2	13.7
TTC37_HUMAN	Tetratricopeptide repeat protein 37	175.4	8.1	55.8	2	1.1	463.60	1.87179	2	284.05	3.65049	2	52.42	2.38605	2	129.45
TTHY_HUMAN	Transthyretin	15.9	5.4	2734	35	73.5	18.61	5.46154	455	130.31	2.14563	462	111.06	0.497674	490	52.18
TWSG1_HUMAN	Twisted gastrulation protein homolog 1	25.0	5.1	246.2	4	24.2	16.76	1.05128	24	40.04	0.563107	24	35	0.67907	24	9.98
TXD17_HUMAN	Thioredoxin domain-containing protein 17	13.9	5.3	94.5	2	15.4	40.38	0.641026	3	34.39	0.757282	3	19.66	1.45116	3	33.07
TXLNB_HUMAN	Beta-taxilin	76.5	4.8	89.3	3	2.9	25.09	1.89744	7	136.83	0.796117	7	196.57	0.516279	7	189.27
TXND5_HUMAN	Thioredoxin domain-containing protein 5	47.6	5.6	157.1	3	12.5	324.59	1.12821	4	38.85	1.12621	4	46.29	1.2093	4	14.08
TYPH_HUMAN	Thymidine phosphorylase	49.9	5.2	100.8	1	5.4	218.02	1.69231	2	38.93	1.29126	3	31.57	0.837209	2	80.23
UB2D3_HUMAN	Ubiquitin-conjugating enzyme E2 D3	16.7	9.0	70.4	1	7.5	34.64	0.589744	3	19.72	0.805825	3	6.64	1.65116	3	15.59
UB2L3_HUMAN	Ubiquitin-conjugating enzyme E2 L3	17.9	9.5	131.4	3	24.0	8.34	2.71795	7	122.47	2.29126	7	38.21	1.04186	7	75
UB2V2_HUMAN	Ubiquitin-conjugating enzyme E2 variant 2	16.4	9.0	128.6	3	18.6	8.61	0.358974	10	128.58	0.757282	10	19.58	2.59535	10	101.33
UBA1_HUMAN	Ubiquitin-like modifier-activating enzyme 1	117.8	5.4	482.1	8	10.6	15.95	0.923077	14	67.24	1.8932	14	52.16	2.54884	14	77.96
UBE2Z_HUMAN	Ubiquitin-conjugating enzyme E2 Z	38.2	5.3	55.9	2	2.8	3.32	0.282051	4	22.27	0.116505	4	13.24	0.506977	4	19.44
UBP14_HUMAN	Ubiquitin carboxyl-terminal hydrolase 14	56.0	5.1	30.4	1	2.6	3.17	1.23077	2	5.8	2.08738	2	9.6	2.08372	2	15.46
UBQL1_HUMAN	Ubiquilin-1	62.5	4.9	60.1	1	2.7	15.74	0.974359	2	15.63	0.660194	2	0.2	0.837209	2	15.82
UBQL2_HUMAN	Ubiquilin-2	65.7	5.0	33.2	1	2.6	13.85	0.692308	2	16.37	0.61165	2	2.13	1.08372	2	18.55
UEVLD_HUMAN	Ubiquitin-conjugating enzyme E2 variant 3	52.2	6.7	128.4	2	6.2	31.48	0.538462	3	40.02	0.339806	3	35.44	0.767442	3	29.1
UFO_HUMAN	Tyrosine-protein kinase receptor UFO	98.3	5.2	685.8	10	12.8	12.11	0.641026	69	52.46	0.359223	69	74.9	0.683721	66	56.54
UN13C_HUMAN	Protein unc-13 homolog C	250.8	5.6	70.2	2	0.5	52.65	8.17949	15	244.04	4.51456	15	221.05	0.67907	15	25.39
UPAR_HUMAN	Urokinase plasminogen activator surface receptor	37.0	6.2	79.5	2	10.1	300.26	1.89744	2	50.2	1.24272	2	8.17	0.804651	2	40.82
URM1_HUMAN	Ubiquitin-related modifier 1 homolog	11.4	4.4	108.1	2	19.8	30.41	0.948718	5	13.38	0.912621	5	3.93	1.17209	5	16.71
UROK_HUMAN	Urokinase-type plasminogen activator	48.5	9.9	369.2	8	19.0	16.44	0.307692	27	71.52	0.359223	30	52.49	1.44186	27	66.98
UROM_HUMAN	Uromodulin	69.7	4.9	5932.3	100	45.5	35.38	0.666667	2013	70.67	0.23301	1992	88.46	0.418605	1933	50.96
UTER_HUMAN	Uteroglobin	10.0	4.8	1221.6	14	50.5	95.52	4.28205	91	53.18	2.5534	91	47.63	0.725581	99	28.68
VAC14_HUMAN	Protein VAC14 homolog	87.9	5.7	25.8	1	1.3	570.21	0.692308	2	10.77	0.23301	2	15.76	0.4	2	26.87
VAS1_HUMAN	V-type proton ATPase subunit S1	52.0	5.7	124.8	3	10.2	10.92	1.5641	6	17.92	0.640777	6	51.08	0.502326	6	66.18
VASN_HUMAN	Vasorin	71.7	8.0	795.7	11	23.2	11.98	0.487179	79	50.8	0.563107	81	61.59	1.45116	79	34.45
VASP_HUMAN	Vasodilator-stimulated phosphoprotein	39.8	9.7	128.6	2	6.6	11.21	0.666667	4	52.29	1.3301	4	24.52	2.44651	4	26.53
VATA_HUMAN	V-type proton ATPase catalytic subunit A	68.3	5.2	171.2	3	5.5	11.38	0.358974	10	37.13	0.38835	13	37.89	1.38605	10	48.13
VATB1_HUMAN	V-type proton ATPase subunit B, kidney isoform	56.8	5.3	193.6	4	13.6	9.67	0.615385	8	28.26	0.757282	8	35.95	1.48837	8	49.16
VATC2_HUMAN	V-type proton ATPase subunit C 2	48.7	5.8	54.5	1	1.9	45.34	1.76923	2	19.94	3.16505	2	6.85	2.20465	2	12.95
VATE2_HUMAN	V-type proton ATPase subunit E 2	26.1	9.4	60.1	2	3.5	12.10	0.487179	2	39.02	0.485437	2	22.88	1.20465	2	15.15
VCAM1_HUMAN	Vascular cell adhesion protein 1	81.2	5.0	1142.5	17	25.2	14.05	2.05128	103	39.06	1.3301	103	36.2	0.837209	99	23.98
VDAC1_HUMAN	Voltage-dependent anion-selective channel protein 1	30.8	9.2	207.3	3	13.8	16.50	0.512821	6	40.31	0.398058	6	31.46	0.95814	6	49.24
VILI_HUMAN	Villin-1	92.6	6.0	244.6	5	9.8	17.32	1.07692	9	50.63	3.38835	12	56.81	4.42791	9	61.85
VIME_HUMAN	Vimentin	53.6	4.9	609.2	13	25.8	11.74	0.487179	41	108.49	0.84466	41	60.33	2.25581	41	83.35
VINC_HUMAN	Vinculin	123.7	5.4	402.6	9	10.1	15.39	1.07692	14	115.87	0.825243	15	78.31	0.916279	14	65.83
VIP_HUMAN	VIP peptides	19.2	6.2	39.4	1	4.7	1040.83	0.974359	2	0.09	0.631068	2	2.88	0.795349	2	2.97
VMO1_HUMAN	Vitelline membrane outer layer protein 1 homolog	21.5	4.8	975.9	10	58.9	11.04	0.820513	73	60.35	0.300971	73	52.61	0.455814	73	42.28
VNN1_HUMAN	Pantetheinase	57.0	5.2	257.9	6	20.7	18.58	1.02564	13	41.87	0.68932	17	71.73	0.753488	14	61.46
VP13C_HUMAN	Vacuolar protein sorting-associated protein 13C	422.1	6.4	134.4	2	0.4	21.66	1.46154	3	9.17	3.30097	3	20.03	2.77209	3	23.49
VP13D_HUMAN	Vacuolar protein sorting-associated protein 13D	491.5	6.1	67.4	2	0.5	21.36	1.61538	2	5.66	1.57282	3	81.96	0.725581	2	12.13
VPS28_HUMAN	Vacuolar protein sorting-associated protein 28 homolog	25.4	5.2	75.7	2	11.3	12.25	0.538462	2	16.21	0.398058	2	6.26	0.883721	2	22.64
VPS4A_HUMAN	Vacuolar protein sorting-associated protein 4A	48.9	8.6	350.8	6	16.2	18.72	0.358974	17	58.05	0.262136	17	42.6	0.906977	17	42.6
VPS4B_HUMAN	Vacuolar protein sorting-associated protein 4B	49.3	6.9	532.8	10	23.9	15.62	0.358974	22	71.43	0.23301	23	65.45	0.762791	22	63.31
VSIG4_HUMAN	V-set and immunoglobulin domain-containing protein 4	44.0	5.9	575	8	25.3	12.25	0.974359	56	63.51	1.24272	56	43.83	1.6	56	38.84
VTA1_HUMAN	Vacuolar protein sorting-associated protein VTA1 homolog	33.9	5.8	108.2	2	9.8	13.94	0.74359	4	164.86	0.378641	4	70.26	0.623256	4	55.45
VTDB_HUMAN	Vitamin D-binding protein	52.9	5.3	4097.4	57	71.3	16.61	7.35897	426	72.06	2.66019	428	75.28	0.47907	427	29.23
VTNC_HUMAN	Vitronectin	54.3	5.5	758.9	12	21.1	13.23	4.4359	127	82.33	1.8835	127	71.28	0.516279	126	23.76
VWDE_HUMAN	von Willebrand factor D and EGF domain-containing protein	176.7	5.3	55.7	2	0.9	42.31	7.23077	9	317.03	3.09709	9	81.28	0.525581	9	103.94
VWF_HUMAN	von Willebrand factor	309.1	5.2	210.2	3	1.4	4.28	0.974359	7	37.52	1.87379	7	65.66	2.3814	7	70.06
WDR1_HUMAN	WD repeat-containing protein 1	66.2	6.2	281.3	5	17.3	126.39	1.20513	9	22.26	1.26214	9	25.78	1.29767	9	19.1
WDR11_HUMAN	WD repeat-containing protein 11	136.6	6.5	30.6	1	0.7	62.64	2.53846	4	20.13	1.08738	4	9.52	0.52093	4	12.6
WDR33_HUMAN	pre-mRNA 3' end processing protein WDR33	145.8	9.9	58.3	2	1.2	14.33	6.12821	12	219.79	2.63107	12	217.43	0.530233	12	12.07
WDR78_HUMAN	WD repeat-containing protein 78	94.5	5.4	25.3	1	0.7	9.10	1.33333	2	6.94	1.43689	2	5.3	1.32558	2	1.63
WISP2_HUMAN	WNT1-inducible-signaling pathway protein 2	26.8	11.3	356	6	29.6	12.85	3.33333	43	131.37	3.83495	43	132.28	1.37674	42	27.51
XPP2_HUMAN	Xaa-Pro aminopeptidase 2	75.6	5.6	729.8	13	23.9	15.95	0.615385	38	75.48	0.92233	38	23.21	1.87442	38	66
XRCC5_HUMAN	X-ray repair cross-complementing protein 5	82.7	5.5	82.3	1	2.6	14.68	0.871795	3	44.2	2.42718	3	63.7	3.40465	3	41.84
XRN1_HUMAN	5'-3' exoribonuclease 1	194.0	6.8	92.4	2	0.9	784.21	1.07692	4	45.61	3.62136	4	190.48	4.10698	4	134.71
YIPF3_HUMAN	Protein YIPF3	38.2	5.4	41	1	2.9	7.02	0.820513	4	44.72	0.660194	4	19.58	0.986047	4	31.6
ZA2G_HUMAN	Zinc-alpha-2-glycoprotein	34.2	5.7	3697.9	63	67.8	14.56	3.53846	612	40.83	1.51456	608	38.65	0.534884	611	27.31
ZBED1_HUMAN	Zinc finger BED domain-containing protein 1	78.1	5.7	27.7	1	1.4	18.10	4.02564	2	11.86	0.92233	2	9.75	0.27907	2	2.09
ZEP1_HUMAN	Zinc finger protein 40	296.7	8.9	38.9	1	0.4	701.17	4.66667	2	36.25	6.83495	2	47.49	1.79535	2	9.99
ZFHX4_HUMAN	Zinc finger homeobox protein 4	393.5	5.9	64.4	1	0.3	22.61	1.15385	2	68.85	2.6699	2	26.14	2.8186	2	37.84
ZG16_HUMAN	Zymogen granule membrane protein 16	18.2	10.0	207.3	4	37.7	11.53	1.35897	7	48.75	2.20388	7	78.43	1.97674	7	69.72
ZG16B_HUMAN	Zymogen granule protein 16 homolog B	22.7	7.6	216	5	30.8	24.42	0.358974	12	138.63	0.223301	12	51.35	0.753488	12	96.25
ZN106_HUMAN	Zinc finger protein 106	208.8	6.8	61	1	0.4	769.04	2.02564	2	61.03	0.951456	2	31.1	0.581395	2	26.33
ZN292_HUMAN	Zinc finger protein 292	304.6	7.7	85	2	0.5	11.69	1.15385	6	59.2	0.708738	6	28.9	0.762791	6	29.81
ZN440_HUMAN	Zinc finger protein 440	69.1	10.3	56.6	1	1.2	902.92	0.384615	3	3.26	0.650485	3	13.46	2.07442	3	10.33
ZN513_HUMAN	Zinc finger protein 513	57.8	8.7	28.2	1	2.2	656.04	1.10256	2	5.05	18.6311	2	29.05	20.7209	2	23.74
ZN645_HUMAN	E3 ubiquitin-protein ligase ZNF645	48.8	10.3	37.9	1	3.1	595.74	0.769231	3	46.69	0.38835	3	24.05	0.613953	3	21.14

## Sheet: 3rd iTRAQ results
Supplementary Table 2(c). The list of identified proteins of 3rd iTRAQ experiment.
Accession	Protein	MW [kDa]	pI	Scores	#Peptides	SC [%]	RMS90 [ppm]	Median(CKD/N)	#(CKD/N)	CV [%](CKD/N)	Median(UC/N)	#(UC/N)	CV [%](UC/N)	Median(UC/CKD)	#(UC/CKD)	CV [%](UC/CKD)
1433B_HUMAN	14-3-3 protein beta/alpha	28.1	4.6	446.7	11	35.4	32.09	0.492537	43	66.34	0.944882	44	25.87	1.79188	44	80.99
1433E_HUMAN	14-3-3 protein epsilon	29.2	4.5	599	11	42.4	30.07	0.552239	65	70.34	0.897638	66	30.67	1.59898	65	71.85
1433T_HUMAN	14-3-3 protein theta	27.7	4.5	272.3	7	24.1	33.02	0.477612	39	69.1	0.96063	39	23.72	1.95431	39	73.54
1433Z_HUMAN	14-3-3 protein zeta/delta	27.7	4.6	460.2	9	38.4	31.39	0.447761	47	67.14	1.03937	49	37.43	2.2132	47	77.88
1B57_HUMAN	HLA class I histocompatibility antigen, B-57 alpha chain	40.2	5.9	107.4	2	7.5	21.17	1.22388	5	22.6	0.92126	5	15.43	0.725888	5	9.42
2AAA_HUMAN	Serine/threonine-protein phosphatase 2A 65 kDa regulatory subunit A alpha isoform	65.3	4.9	79.7	1	2.7	23.03	0.880597	5	34	1.07874	6	46.95	1.21827	5	48.65
4F2_HUMAN	4F2 cell-surface antigen heavy chain	68.0	4.7	316.2	5	11.4	26.73	0.880597	23	42.45	0.976378	23	32.37	1.05076	24	28.42
6PGD_HUMAN	6-phosphogluconate dehydrogenase, decarboxylating	53.1	7.0	76.9	2	6.0	21.04	1.16418	2	8.25	3.00787	2	5.07	2.47208	2	3.17
6PGL_HUMAN	6-phosphogluconolactonase	27.5	5.7	642	11	52.7	28.22	0.910448	62	37.78	1.09449	65	46.72	1.13706	66	51.02
8ODP_HUMAN	7,8-dihydro-8-oxoguanine triphosphatase	22.5	5.0	375.3	6	34.5	23.70	0.895522	23	55.7	0.685039	24	45.3	0.751269	23	43.9
A1AG1_HUMAN	Alpha-1-acid glycoprotein 1	23.5	4.8	2388.5	42	54.7	26.98	1.46269	386	79.98	0.92126	392	77.32	0.568528	392	58.05
A1AG2_HUMAN	Alpha-1-acid glycoprotein 2	23.6	4.9	1838.7	38	58.2	23.96	1.19403	177	148.29	0.968504	174	104.4	0.77665	178	91.03
A1AT_HUMAN	Alpha-1-antitrypsin	46.7	5.3	8657.6	143	71.1	28.74	1.43284	1900	90.58	1.29134	2014	50.47	0.84264	1980	75.9
A1ATR_HUMAN	Putative alpha-1-antitrypsin-related protein	47.9	8.6	55.1	1	1.7	22.98	3.10448	4	7.05	4.43307	4	5.97	1.37563	4	2.84
A1BG_HUMAN	Alpha-1B-glycoprotein	54.2	5.5	3185.8	48	49.9	27.22	1.80597	587	78.69	1.09449	600	54.93	0.517766	653	81.99
A26L1_HUMAN	Putative ankyrin repeat domain-containing protein 26-like 1	14.2	9.6	112.2	2	16.0	44.09	0.462687	5	40.66	0.291339	5	75.82	0.614213	5	32.17
A2AP_HUMAN	Alpha-2-antiplasmin	54.5	5.9	799.6	12	27.3	32.71	0.895522	91	47.88	1.70079	99	46.32	1.88832	93	45.92
A2GL_HUMAN	Leucine-rich alpha-2-glycoprotein	38.2	6.5	2673.3	41	62.5	28.67	1.70149	311	55.37	1.48819	352	47.53	0.86802	329	48.51
A2MG_HUMAN	Alpha-2-macroglobulin	163.2	6.0	8982.4	142	64.0	27.45	1.31343	1062	59.58	6.79528	1142	143.88	5.25888	1137	124.36
A2ML1_HUMAN	Alpha-2-macroglobulin-like protein 1	161.0	5.4	597.8	10	9.5	25.74	0.38806	26	76.91	0.330709	26	76.38	0.847716	27	52.06
A4_HUMAN	Amyloid beta A4 protein	86.9	4.6	71.9	2	3.2	23.38	0.626866	3	18.18	0.377953	3	15.66	0.583756	3	34.55
AACT_HUMAN	Alpha-1-antichymotrypsin	47.6	5.2	4791.7	76	59.6	26.85	1.08955	537	50.63	0.976378	594	42	0.862944	563	48.85
AATC_HUMAN	Aspartate aminotransferase, cytoplasmic	46.2	6.6	302.4	7	27.4	30.86	0.940299	24	52.95	2.33071	24	222.79	2.39086	24	139.03
ABCA1_HUMAN	ATP-binding cassette sub-family A member 1	254.1	6.4	56	1	0.3	15.47	0.835821	15	75.4	1.22047	15	58.55	1.50761	14	20.75
ABCA5_HUMAN	ATP-binding cassette sub-family A member 5	186.4	6.5	60.6	2	0.8	22.03	1.49254	4	16.78	1.75591	4	14.68	1.13198	4	12.92
ABCA8_HUMAN	ATP-binding cassette sub-family A member 8	179.1	6.9	111.2	4	1.7	24.05	1.35821	11	35.83	5.61417	11	319.28	3.9797	11	245.72
ABCC8_HUMAN	ATP-binding cassette sub-family C member 8	176.9	8.9	52.8	2	0.3	24.87	1.25373	4	30.37	1.16535	4	31.05	0.893401	4	6.03
ABHEB_HUMAN	Alpha/beta hydrolase domain-containing protein 14B	22.3	5.9	301.2	5	26.7	26.01	1.25373	35	36.86	1.37795	36	65.16	0.974619	35	44.01
ABP1_HUMAN	Amiloride-sensitive amine oxidase [copper-containing]	85.3	6.6	69.2	2	3.5	22.24	1.16418	4	26.24	1.04724	4	5.58	0.86802	4	24.51
ABRA_HUMAN	Actin-binding Rho-activating protein	43.1	9.4	37.9	1	2.9	14.58	2.9403	2	8.21	2.25984	2	10.76	0.741117	2	19.09
ABRAL_HUMAN	Costars family protein ABRACL	9.1	5.8	187	3	45.7	24.93	0.970149	8	40.15	3.10236	18	68.37	2.61421	9	78.2
ACBP_HUMAN	Acyl-CoA-binding protein	10.0	6.2	182.8	5	57.5	30.31	0.746269	18	40.85	0.984252	17	13.56	1.31472	18	39.51
ACE_HUMAN	Angiotensin-converting enzyme	149.6	5.9	294.6	6	7.7	26.55	0.731343	17	46.08	1.4252	18	36.1	1.85787	17	38.34
ACE2_HUMAN	Angiotensin-converting enzyme 2	92.4	5.3	395.6	7	6.6	23.80	0.985075	22	55.7	1.30709	23	35.7	1.37056	22	42.99
ACON_HUMAN	Aconitate hydratase, mitochondrial	85.4	7.9	30.8	1	0.8	1133.69	3.10448	2	67.64	4.0315	2	70.47	1.24365	3	1.92
ACPH_HUMAN	Acylamino-acid-releasing enzyme	81.2	5.2	265	5	8.7	23.99	0.850746	10	18.75	1.30709	10	39.56	1.49239	10	40.9
ACS2A_HUMAN	Acyl-coenzyme A synthetase ACSM2A, mitochondrial	64.2	9.2	57.6	2	1.9	30.86	0.492537	12	25.78	1.46457	11	10.83	3.14721	12	26.38
ACSF4_HUMAN	Acyl-CoA synthetase family member 4	122.5	7.0	75.2	2	0.7	17.54	2.0597	33	19.07	2.23622	33	21.1	1.07107	33	19.54
ACSS3_HUMAN	Acyl-CoA synthetase short-chain family member 3, mitochondrial	74.7	9.5	55.5	2	2.2	1080.99	2.20896	2	57.65	0.732283	2	57.12	0.319797	2	0.43
ACTB_HUMAN	Actin, cytoplasmic 1	41.7	5.2	2151.7	36	55.2	27.65	1.16418	223	45.11	1.29921	227	35.09	1.05076	228	47.37
ACTBL_HUMAN	Beta-actin-like protein 2	42.0	5.3	523	10	19.1	24.85	1.35821	40	61.47	1.43307	41	41.33	0.959391	41	59.64
ACTC_HUMAN	Actin, alpha cardiac muscle 1	42.0	5.1	1157.1	22	28.4	26.77	1.1194	129	38.11	1.2126	132	26.83	1.00508	132	47.13
ACTN1_HUMAN	Alpha-actinin-1	103.0	5.1	661.1	15	16.5	25.98	1.1194	35	33.7	1.75591	35	39.08	1.49239	34	40.01
ACTN4_HUMAN	Alpha-actinin-4	104.8	5.2	1023.4	23	31.5	24.56	0.940299	49	39.61	1.3937	50	52.04	1.41117	51	50.18
ACTT1_HUMAN	Actin-related protein T1	41.7	6.3	25.8	1	3.5	13.33	4.13433	2	8.46	6.48819	2	5.52	1.50761	2	2.93
ACY1_HUMAN	Aminoacylase-1	45.9	5.7	572.6	11	33.6	27.67	0.955224	38	65.17	0.740157	38	51.01	0.751269	37	55.42
ACY3_HUMAN	Aspartoacylase-2	35.2	5.5	60.8	1	5.3	40.88	0.791045	2	1.38	0.543307	2	28.97	0.670051	2	27.52
ADCYA_HUMAN	Adenylate cyclase type 10	187.0	7.1	94.5	1	0.5	26.01	0.61194	2	9.76	0.393701	2	4.15	0.614213	2	5.59
ADEC1_HUMAN	ADAM DEC1	52.7	7.3	101.8	3	7.4	210.76	1.35821	10	53.58	3.22047	10	108.79	2.26904	10	76.5
ADIPO_HUMAN	Adiponectin	26.4	5.4	398.8	6	25.4	27.47	1.44776	31	76.81	1.86614	32	42.91	1.20305	34	57.03
ADIRF_HUMAN	Adipogenesis regulatory factor	7.8	5.0	122.7	2	52.6	20.68	1.38806	4	30.81	0.795276	4	18.25	0.548223	4	20.03
ADO_HUMAN	Aldehyde oxidase	147.8	6.9	83.6	2	3.4	18.67	1.0597	2	20.49	0.708661	2	12.83	0.639594	2	33.98
AF1L2_HUMAN	Actin filament-associated protein 1-like 2	91.2	5.1	56.3	1	1.5	11.24	1.20896	3	20.44	0.511811	3	8.15	0.406091	3	19.4
AFAD_HUMAN	Afadin	206.7	6.0	62.9	1	0.3	1094.54	2.07463	4	9.49	1.6378	4	14.05	0.761421	4	19.06
AFAM_HUMAN	Afamin	69.0	5.6	1681.4	32	36.4	26.11	2.37313	150	53.59	0.96063	155	43.52	0.365482	152	54.38
AGAL_HUMAN	Alpha-galactosidase A	48.7	5.2	192.6	3	8.4	20.94	0.761194	11	27.37	0.543307	11	33.59	0.680203	11	58.06
AGRIN_HUMAN	Agrin	217.1	6.0	601.4	9	6.0	28.37	1.56716	71	47.54	1.30709	73	49.32	0.827411	72	42.94
AHNK_HUMAN	Neuroblast differentiation-associated protein AHNAK	628.7	5.7	120.1	4	0.7	505.66	1.04478	4	73.66	0.889764	4	46.59	0.822335	4	85.03
AHSP_HUMAN	Alpha-hemoglobin-stabilizing protein	11.8	4.7	109.3	2	20.6	29.33	0.701493	30	41.7	1.95276	30	46.26	2.67005	30	40.67
AIF1_HUMAN	Allograft inflammatory factor 1	16.7	5.9	89.2	2	7.5	49.84	1.8806	2	25.02	2.95276	2	1.7	1.51269	2	26.81
AK1A1_HUMAN	Alcohol dehydrogenase [NADP(+)]	36.5	6.4	262.8	5	19.1	28.73	0.940299	20	72.31	0.779528	19	39.9	0.893401	20	74.09
AK1BA_HUMAN	Aldo-keto reductase family 1 member B10	36.0	8.7	62.7	2	7.3	18.27	0.910448	2	22.44	1.77953	2	30.83	1.86802	2	7.98
AKA11_HUMAN	A-kinase anchor protein 11	210.4	5.1	25.2	1	0.5	38.78	2.44776	3	23.03	1.22047	3	7.72	0.477157	3	17.61
AKAP9_HUMAN	A-kinase anchor protein 9	453.4	4.8	142.1	4	0.8	554.51	1.0597	5	20.12	2.66142	5	49.45	2.4264	5	36.01
AL1A1_HUMAN	Retinal dehydrogenase 1	54.8	6.3	175.7	4	9.0	23.63	0.731343	8	39.74	0.88189	8	20.42	1.15228	8	37.57
AL1L1_HUMAN	Cytosolic 10-formyltetrahydrofolate dehydrogenase	98.8	5.6	76.4	2	3.4	36.21	0.80597	7	67.53	1.10236	7	56.08	1.30964	7	45.18
AL9A1_HUMAN	4-trimethylaminobutyraldehyde dehydrogenase	53.8	5.6	75.3	2	4.7	25.21	1.07463	2	8.49	0.866142	2	24.41	0.781726	2	15.68
ALBU_HUMAN	Serum albumin	69.3	5.9	16333.6	283	80.0	26.82	1.37313	5187	98.97	0.724409	5245	51.57	0.48731	5315	102.28
ALDOA_HUMAN	Fructose-bisphosphate aldolase A	39.4	9.2	260.6	6	21.2	28.80	0.835821	12	57.77	1.38583	12	38.06	1.59898	12	46.09
ALDOB_HUMAN	Fructose-bisphosphate aldolase B	39.4	9.0	960.9	17	34.3	23.74	0.940299	60	46.96	0.787402	60	43.82	0.817259	61	54.91
ALS_HUMAN	Insulin-like growth factor-binding protein complex acid labile subunit	66.0	6.4	170.3	4	9.9	30.44	1.08955	7	23.54	1.14961	8	18.96	1.02538	7	16.71
AMBP_HUMAN	Protein AMBP	39.0	5.9	5367.7	82	49.1	24.76	1.16418	2446	65.61	1.2126	2865	54.55	0.989848	2741	67.99
AMD_HUMAN	Peptidyl-glycine alpha-amidating monooxygenase	108.3	6.0	155.7	3	3.0	25.69	0.925373	11	21.28	0.88189	11	23.97	0.918782	11	25.62
AMER2_HUMAN	APC membrane recruitment protein 2	69.5	6.6	61.4	2	2.4	44.51	1.74627	12	29.17	3.2126	12	114.76	1.7665	12	97.79
AMPE_HUMAN	Glutamyl aminopeptidase	109.2	5.2	1715.6	34	32.0	26.31	1.26866	137	36.83	1.14961	144	34.95	0.86802	139	40.53
AMPN_HUMAN	Aminopeptidase N	109.5	5.2	4481.9	75	46.7	28.48	0.835821	509	50.76	0.834646	559	39.35	0.969543	522	47.23
AMY1_HUMAN	Alpha-amylase 1	57.7	6.5	4314.6	67	60.1	28.42	0.507463	626	94.28	0.456693	661	86.95	0.832487	633	46.67
AMY2B_HUMAN	Alpha-amylase 2B	57.7	6.7	4582.4	73	66.3	28.09	0.477612	545	84.91	0.417323	584	72.99	0.807107	553	48.63
AMYP_HUMAN	Pancreatic alpha-amylase	57.7	6.7	4738.8	77	62.0	28.36	0.477612	609	84.48	0.417323	645	72.95	0.796954	611	49.97
AN34B_HUMAN	Ankyrin repeat domain-containing protein 34B	56.4	8.6	89.3	1	2.1	38.85	2.25373	16	41.59	1.31496	16	33.07	0.522843	15	28.86
AN36A_HUMAN	Ankyrin repeat domain-containing protein 36A	217.3	9.5	137.6	3	1.0	922.66	2.62687	4	80.95	1.48031	4	91.66	0.543147	4	202.04
ANAG_HUMAN	Alpha-N-acetylglucosaminidase	82.2	6.2	2515.9	37	46.6	26.34	0.791045	288	44.67	0.622047	298	58.8	0.741117	291	48.09
ANGL2_HUMAN	Angiopoietin-related protein 2	57.1	7.8	664.2	15	30.0	24.91	0.940299	38	28.77	0.88189	38	43.55	0.86802	37	42.36
ANGT_HUMAN	Angiotensinogen	53.1	5.9	2377.7	31	32.6	26.80	1.70149	352	59.37	2.7874	400	94.11	1.60406	401	67.25
ANKH1_HUMAN	Ankyrin repeat and KH domain-containing protein 1	269.3	5.4	145.5	2	0.5	9.39	0.656716	5	10.54	1.33858	5	17.04	2.1066	6	16.34
ANO9_HUMAN	Anoctamin-9	90.3	9.3	62.6	2	1.8	16.10	0.985075	8	77.71	1.37008	8	114.47	1.33503	8	36.97
ANR11_HUMAN	Ankyrin repeat domain-containing protein 11	297.7	6.7	57.8	1	0.3	32.48	2.38806	2	34.07	2.6378	2	31.1	1.06091	2	2.76
ANR12_HUMAN	Ankyrin repeat domain-containing protein 12	235.5	6.6	50.6	1	0.6	16.00	5.73134	3	80.27	0.937008	3	30.91	0.15736	3	50.4
ANR31_HUMAN	Putative ankyrin repeat domain-containing protein 31	210.7	5.8	29.4	1	0.4	29.45	18.5075	2	2.08	3.92913	2	4.07	0.203046	2	1.99
ANT3_HUMAN	Antithrombin-III	52.6	6.3	2850.8	50	60.3	26.50	1.53731	298	52.59	1.51181	306	52.02	0.964467	298	42.52
ANTR1_HUMAN	Anthrax toxin receptor 1	62.7	8.6	867.6	17	16.8	28.42	1.35821	43	66.87	1.11024	46	60.25	0.817259	46	77.01
ANX11_HUMAN	Annexin A11	54.4	8.5	397.4	7	15.0	25.63	0.298507	34	30.33	0.314961	34	28.53	0.989848	33	20.44
ANXA1_HUMAN	Annexin A1	38.7	6.7	1053.5	14	41.6	31.05	0.447761	115	56.64	0.385827	117	75.31	0.781726	117	64.03
ANXA2_HUMAN	Annexin A2	38.6	8.5	1426.6	24	65.5	25.64	0.328358	98	66.37	0.275591	98	52.92	0.847716	100	48.51
ANXA3_HUMAN	Annexin A3	36.4	5.5	315.3	7	26.6	23.52	0.701493	15	35.95	0.724409	14	18.62	1.06091	15	23.71
ANXA4_HUMAN	Annexin A4	35.9	5.8	597.5	11	41.1	24.17	0.552239	30	47.87	0.606299	30	54.26	1.07107	30	42.22
ANXA5_HUMAN	Annexin A5	35.9	4.8	669.6	13	35.6	29.02	0.41791	62	49.9	0.511811	71	51.17	1.11168	63	54.46
ANXA6_HUMAN	Annexin A6	75.8	5.3	418.8	8	14.4	26.66	0.567164	28	63.06	0.700787	29	48.91	1.19289	27	44.24
AP2E_HUMAN	Transcription factor AP-2-epsilon	46.2	9.5	38.4	1	1.6	29.01	0.955224	8	20.75	1.44094	8	14.6	1.46193	8	14.29
APOA1_HUMAN	Apolipoprotein A-I	30.8	5.5	2583.4	44	65.5	27.33	1.38806	434	66.78	7.62205	436	138.23	5.05584	435	120.56
APOA2_HUMAN	Apolipoprotein A-II	11.2	7.1	488.4	8	69.0	27.98	1.56716	58	34.38	5.26772	57	47.57	3.24873	57	29.4
APOA4_HUMAN	Apolipoprotein A-IV	45.4	5.2	4627.8	78	79.8	25.29	2	452	77.75	5.02362	455	178.21	2.42132	454	106.31
APOB_HUMAN	Apolipoprotein B-100	515.3	6.6	1322.9	27	9.1	26.37	1.25373	48	62	3.72441	56	91.42	3.10152	56	95.99
APOC2_HUMAN	Apolipoprotein C-II	11.3	4.5	317.9	5	49.5	30.37	1.58209	12	30.24	3.32283	18	71.03	2.34518	13	71.92
APOC3_HUMAN	Apolipoprotein C-III	10.8	5.1	215.7	3	34.3	32.32	1.95522	70	36.98	7.02362	70	78.02	3.41117	71	66.75
APOD_HUMAN	Apolipoprotein D	21.3	4.9	1446.4	25	38.1	29.78	1.14925	247	36.53	0.818898	245	44.9	0.695431	244	32.18
APOE_HUMAN	Apolipoprotein E	36.1	5.5	267.1	5	19.6	20.51	0.955224	15	33.88	1.33071	15	18.17	1.36041	15	37.16
APOF_HUMAN	Apolipoprotein F	35.4	5.3	117.8	3	10.4	25.29	1.50746	11	70.3	11.0315	11	93.92	7.04061	11	46.93
APOH_HUMAN	Beta-2-glycoprotein 1	38.3	9.5	829	16	25.8	26.63	1.14925	115	61.02	2.01575	116	57.56	1.63959	122	56.42
APOM_HUMAN	Apolipoprotein M	21.2	5.6	196.6	4	36.2	32.45	1.20896	12	51.84	1.18898	13	51.88	0.86802	14	42.33
AQP1_HUMAN	Aquaporin-1	28.5	7.8	124	2	19.7	22.49	0.671642	8	58.63	0.322835	8	29.21	0.467005	8	44.95
AQP2_HUMAN	Aquaporin-2	28.8	6.5	224.3	4	18.1	104.05	0.358209	9	28.35	0.338583	9	34.43	0.994924	8	27.59
AQR_HUMAN	Intron-binding protein aquarius	171.2	5.9	57.1	2	0.9	1018.85	0.58209	2	130.92	0.834646	2	83.01	1.38071	2	28.05
ARC1B_HUMAN	Actin-related protein 2/3 complex subunit 1B	40.9	9.8	55.6	2	6.2	428.45	1.20896	3	47.13	1.52756	3	45.57	1.21827	3	71.21
ARF3_HUMAN	ADP-ribosylation factor 3	20.6	7.7	313.4	5	41.4	32.29	0.656716	27	48.28	0.755906	27	29.24	1.17766	26	41
ARGAL_HUMAN	Rho guanine nucleotide exchange factor 10-like protein	140.3	5.5	85.6	3	2.0	644.79	1.32836	4	130.09	3.88976	4	131.79	2.82234	4	207.2
ARGI1_HUMAN	Arginase-1	34.7	6.9	33	1	5.3	17.94	1.29851	4	45.18	0.818898	4	23.7	0.609137	4	53.71
ARK72_HUMAN	Aflatoxin B1 aldehyde reductase member 2	39.6	6.8	78.4	2	9.5	382.52	0.895522	2	31.53	1.00787	2	66.44	1.08122	2	30.35
ARK73_HUMAN	Aflatoxin B1 aldehyde reductase member 3	37.2	6.8	99.2	1	4.5	26.04	0.731343	4	45.63	0.826772	4	17.27	1.09137	4	29.19
ARMC4_HUMAN	Armadillo repeat-containing protein 4	115.6	9.0	58.5	2	1.4	40.21	0.671642	6	97.41	0.393701	6	110.6	0.558376	6	13.51
ARMC9_HUMAN	LisH domain-containing protein ARMC9	91.7	5.8	66.8	2	1.0	626.38	5.65672	3	14.53	6.87402	3	23.04	1.17259	3	10.34
ARP2_HUMAN	Actin-related protein 2	44.7	6.3	120.4	2	6.9	23.95	0.61194	6	78.16	0.944882	6	18.46	1.49239	6	89.39
ARP3C_HUMAN	Actin-related protein 3C	23.7	5.3	59.9	1	5.2	29.68	1.37313	18	81.44	1.12598	19	68.63	0.736041	18	51.25
ARPC3_HUMAN	Actin-related protein 2/3 complex subunit 3	20.5	9.5	37.4	1	6.2	34.14	0.761194	2	0.47	1.3622	2	17.09	1.73096	2	17.58
ARSA_HUMAN	Arylsulfatase A	53.6	5.6	956.4	15	25.2	26.42	0.776119	111	36.68	0.590551	114	47.78	0.730964	112	54.53
ARSB_HUMAN	Arylsulfatase B	59.6	9.2	73.3	2	3.9	30.64	1.02985	5	32.58	0.582677	5	36.96	0.548223	5	13.5
ASAH1_HUMAN	Acid ceramidase	44.6	8.6	1306.1	24	47.8	26.30	1.01493	179	42.99	0.669291	178	43.56	0.629442	179	40.53
ASC_HUMAN	Apoptosis-associated speck-like protein containing a CARD	21.6	5.9	84.7	2	12.3	30.03	1.34328	2	23.2	3.61417	2	4.72	2.58376	2	18.33
ASGR2_HUMAN	Asialoglycoprotein receptor 2	35.1	5.8	195	3	10.9	32.22	0.895522	14	58.93	1.71654	16	135.78	1.95431	14	91.98
ASH1L_HUMAN	Histone-lysine N-methyltransferase ASH1L	332.6	10.1	65.7	2	0.5	29.48	0.313433	13	73.47	0.496063	13	26.51	1.53807	13	61.6
ASM_HUMAN	Sphingomyelin phosphodiesterase	69.7	7.0	54	1	2.2	14.44	1.14925	2	7.74	0.897638	2	14.56	0.751269	2	6.77
ASM3A_HUMAN	Acid sphingomyelinase-like phosphodiesterase 3a	51.2	5.9	93	3	6.6	25.78	0.940299	7	26.36	0.724409	7	22.82	0.741117	7	17.44
ASPG_HUMAN	N(4)-(beta-N-acetylglucosaminyl)-L-asparaginase	37.2	5.8	244.8	4	16.5	21.02	0.776119	6	23.95	0.669291	6	48.32	0.822335	6	35.21
ASPH_HUMAN	Aspartyl/asparaginyl beta-hydroxylase	85.8	4.8	56.4	2	2.1	24.75	1.14925	3	25.41	1.92126	3	128.59	1.60406	3	90.63
ASSY_HUMAN	Argininosuccinate synthase	46.5	8.9	242.6	7	24.8	19.72	1.13433	13	38.57	1.01575	13	35.95	0.796954	15	41.49
ASXL3_HUMAN	Putative Polycomb group protein ASXL3	241.8	5.8	85.3	2	0.6	338.97	0.328358	9	34.6	0.322835	9	48.57	0.923858	9	17.51
AT1A1_HUMAN	Sodium/potassium-transporting ATPase subunit alpha-1	112.8	5.2	45.6	1	1.0	34.40	0.880597	4	47.18	0.944882	4	22.55	1.02538	4	31
AT1B1_HUMAN	Sodium/potassium-transporting ATPase subunit beta-1	35.0	9.4	96.5	2	12.9	23.31	1.44776	5	38.66	1.04724	5	31.9	0.695431	5	51.07
AT2B3_HUMAN	Plasma membrane calcium-transporting ATPase 3	134.1	5.3	58.9	2	0.6	983.38	1.46269	12	49.97	13.5197	12	155.43	8.93909	12	166.38
AT7L1_HUMAN	Ataxin-7-like protein 1	91.5	10.6	57	1	0.7	40.76	1.8209	9	4.33	1.33858	9	6.06	0.705584	9	2.7
ATAD1_HUMAN	ATPase family AAA domain-containing protein 1	40.7	6.5	57.8	2	3.6	27.53	0.731343	5	17.99	1.6378	5	48.54	2.15228	5	54.48
ATM_HUMAN	Serine-protein kinase ATM	350.5	6.4	116	3	0.8	642.59	1.29851	12	50.76	1	12	72.43	0.746193	12	147.17
ATNG_HUMAN	Sodium/potassium-transporting ATPase subunit gamma	7.3	9.2	70.6	1	21.2	24.03	0.358209	5	16.87	0.188976	5	9.72	0.497462	5	22.58
ATPA_HUMAN	ATP synthase subunit alpha, mitochondrial	59.7	9.6	47	1	2.4	26.42	1.07463	2	18.26	1.75591	2	11.34	1.56345	2	6.81
ATPB_HUMAN	ATP synthase subunit beta, mitochondrial	56.5	5.1	82.8	2	5.9	21.67	1.46269	2	4.45	1.51969	2	11.85	1	2	16.36
ATRN_HUMAN	Attractin	158.4	7.9	668.2	13	9.9	27.32	0.656716	51	26.4	0.535433	53	30.67	0.796954	52	30.63
ATS1_HUMAN	A disintegrin and metalloproteinase with thrombospondin motifs 1	105.3	6.4	200.6	3	5.3	17.93	1.0597	13	45.57	0.96063	16	37.95	0.857868	14	57.13
ATS5_HUMAN	A disintegrin and metalloproteinase with thrombospondin motifs 5	101.7	10.2	54.2	1	0.9	904.99	0.19403	3	28.46	0.267717	3	11.66	1.35533	3	16.4
AVL9_HUMAN	Late secretory pathway protein AVL9 homolog	71.9	5.8	25.1	1	1.5	23.49	0.761194	2	0.17	0.464567	2	10.86	0.588832	2	11.04
B2MG_HUMAN	Beta-2-microglobulin	13.7	6.1	2360	36	66.4	27.83	2.44776	406	103.99	3.14173	478	160.09	1.2335	466	72.49
B3AT_HUMAN	Band 3 anion transport protein	101.7	4.9	442.6	8	13.7	28.72	1.47761	37	58.02	5.14173	38	129.51	3.64467	38	163.42
B3GN1_HUMAN	N-acetyllactosaminide beta-1,3-N-acetylglucosaminyltransferase	47.1	6.9	124.9	2	6.7	17.15	0.731343	6	46.19	0.818898	6	21.2	1.07107	6	44.2
B4GT1_HUMAN	Beta-1,4-galactosyltransferase 1	43.9	9.6	225.7	4	14.8	24.72	1.1791	24	59.17	1.1811	24	66.36	0.913706	23	33.48
BAF_HUMAN	Barrier-to-autointegration factor	10.1	5.8	147.9	2	13.5	25.05	0.432836	5	42.64	0.913386	5	24.95	2.0203	5	28
BAI2_HUMAN	Brain-specific angiogenesis inhibitor 2	172.5	8.7	56.3	1	0.6	35.43	0.970149	2	11.73	0.503937	2	29.36	0.492386	2	17.19
BARD1_HUMAN	BRCA1-associated RING domain protein 1	86.6	9.9	36.5	1	0.9	22.53	0.701493	4	10.48	0.748031	4	12.73	1.0203	4	11.41
BCAM_HUMAN	Basal cell adhesion molecule	67.4	5.5	382.8	6	15.6	24.06	0.477612	20	29.38	0.527559	24	54.19	0.908629	21	44.49
BCAR1_HUMAN	Breast cancer anti-estrogen resistance protein 1	93.3	5.3	25.9	1	0.9	986.84	0.761194	2	18.34	12.4567	2	60.33	15.6396	2	38.89
BCAS4_HUMAN	Breast carcinoma-amplified sequence 4	22.7	5.5	27.1	1	2.8	1247.21	1.31343	3	0.94	0.661417	3	0.78	0.482234	3	1.63
BCD1_HUMAN	Box C/D snoRNA protein 1	53.9	5.5	79.7	2	3.2	29.94	1.70149	2	3.37	0.88189	2	30.11	0.497462	2	26.54
BD1L1_HUMAN	Biorientation of chromosomes in cell division protein 1-like 1	330.3	4.9	62.2	1	0.3	23.34	0.716418	2	1.71	1.02362	2	6.31	1.38579	2	8.02
BEND6_HUMAN	BEN domain-containing protein 6	31.2	9.4	35.2	1	3.6	17.33	1.07463	2	52.43	1.82677	2	15.72	1.62944	2	34.63
BGAL_HUMAN	Beta-galactosidase	76.0	6.1	1622.2	30	31.2	27.98	0.895522	177	57.97	0.598425	174	56.3	0.64467	182	46.5
BGH3_HUMAN	Transforming growth factor-beta-induced protein ig-h3	74.6	8.6	177.8	3	5.6	24.22	0.835821	6	117.11	1.43307	6	82.22	3.21827	5	63.23
BGLR_HUMAN	Beta-glucuronidase	74.7	6.6	862.8	18	26.7	31.71	0.776119	84	49.95	0.677165	99	42.24	0.837563	83	46.13
BHMT1_HUMAN	Betaine--homocysteine S-methyltransferase 1	45.0	6.7	516	11	30.5	23.00	0.895522	47	81.72	0.748031	46	67.84	0.878173	46	68.74
BID_HUMAN	BH3-interacting domain death agonist	22.0	5.1	392.5	6	33.3	25.65	0.552239	20	100.1	0.503937	19	44.18	0.939086	21	80.55
BIG3_HUMAN	Brefeldin A-inhibited guanine nucleotide-exchange protein 3	240.5	5.5	60.5	2	0.8	404.90	1	2	10.58	1.03937	2	52.3	1.00508	2	40.1
BLK_HUMAN	Tyrosine-protein kinase Blk	57.7	8.8	59.2	2	2.8	31.97	1.19403	14	80.95	14.8976	14	109.62	13.4975	13	39.52
BLVRB_HUMAN	Flavin reductase (NADPH)	22.1	7.9	296.6	6	38.8	30.76	0.895522	42	45.09	2.85039	43	46.36	3.05584	42	39.12
BROMI_HUMAN	Protein broad-minded	144.7	6.3	225	6	0.7	18.27	1.65672	17	37.02	2.14173	17	30.51	1.24365	17	20.79
BROX_HUMAN	BRO1 domain-containing protein BROX	46.4	8.5	539.1	9	33.3	26.65	0.373134	29	71.26	0.322835	29	49.11	0.918782	28	74.53
BRPF3_HUMAN	Bromodomain and PHD finger-containing protein 3	135.7	6.2	26.5	1	0.7	9.86	0.626866	2	0.61	1.62992	2	8.66	2.49239	2	9.27
BRWD3_HUMAN	Bromodomain and WD repeat-containing protein 3	203.5	8.8	31.3	1	0.4	34.72	0.641791	2	39.55	2.2126	2	0.86	3.3401	2	40.51
BST1_HUMAN	ADP-ribosyl cyclase 2	35.7	9.1	114.5	3	11.6	32.55	0.850746	7	14.08	0.645669	7	23.66	0.725888	7	22.13
BT2A1_HUMAN	Butyrophilin subfamily 2 member A1	59.6	6.1	227.1	5	4.9	25.58	0.507463	14	106.42	0.362205	14	64.03	0.685279	14	61.09
BTD_HUMAN	Biotinidase	61.1	5.8	1557.9	23	25.4	29.20	0.895522	231	45.48	0.637795	239	54.08	0.700508	234	55.96
BUD13_HUMAN	BUD13 homolog	70.5	10.3	54.6	2	3.1	28.64	1	2	27.78	0.858268	2	50.18	0.822335	2	20.33
C19L2_HUMAN	CWF19-like protein 2	103.7	9.4	52.1	2	1.8	681.98	2.29851	2	52.8	1.40157	2	11.89	0.588832	2	67.71
C1QB_HUMAN	Complement C1q subcomponent subunit B	26.7	9.6	101.3	3	14.2	27.88	0.641791	5	61.35	1.51181	5	46.34	2.24873	5	55.38
C1QR1_HUMAN	Complement component C1q receptor	68.5	5.2	85.1	2	3.8	37.25	1.50746	5	24.1	1.14961	5	51.93	0.736041	5	34.19
C1R_HUMAN	Complement C1r subcomponent	80.1	5.8	303.4	7	9.9	25.90	1.14925	32	61.14	1.13386	33	111.55	0.928934	32	86.48
C1RL_HUMAN	Complement C1r subcomponent-like protein	53.5	6.9	686	12	20.1	27.59	0.955224	86	69.66	0.614173	83	70.4	0.659898	83	53.73
C1S_HUMAN	Complement C1s subcomponent	76.6	4.7	410.8	9	14.1	27.55	1.1194	31	60.56	2.61417	32	49.53	2.1269	32	47.68
CA123_HUMAN	UPF0587 protein C1orf123	18.0	4.8	159	3	20.0	31.01	1.37313	10	27.95	1.23622	10	33.6	0.86802	10	29.24
CA222_HUMAN	Uncharacterized protein C1orf222	33.1	5.6	28.1	1	2.6	30.50	1.68657	2	8.32	1.33858	2	2.35	0.766497	2	5.97
CAB39_HUMAN	Calcium-binding protein 39	39.8	6.5	195.8	5	11.4	493.36	0.552239	15	59.96	0.425197	15	66.03	0.730964	15	143.58
CAB45_HUMAN	45 kDa calcium-binding protein	41.8	4.6	89	2	4.7	22.11	0.835821	4	16.41	0.968504	4	17.77	1.11675	4	12.64
CAC1D_HUMAN	Voltage-dependent L-type calcium channel subunit alpha-1D	245.0	6.3	34	1	0.3	11.82	0.283582	6	39.88	0.141732	6	28.64	0.477157	6	55.46
CAD11_HUMAN	Cadherin-11	87.9	4.6	975.1	16	19.6	24.73	0.940299	73	34.5	0.692913	72	25.69	0.715736	74	39.12
[truncated: 1,363 more rows]
